# Supplementary material
Source: Royal Society of Chemistry journal article supplement (doi:10.1039/d6an00088f)
Supplement: d6an00088f1.pdf [file d6an00088f1.pdf]

## 1 Supplementary figures

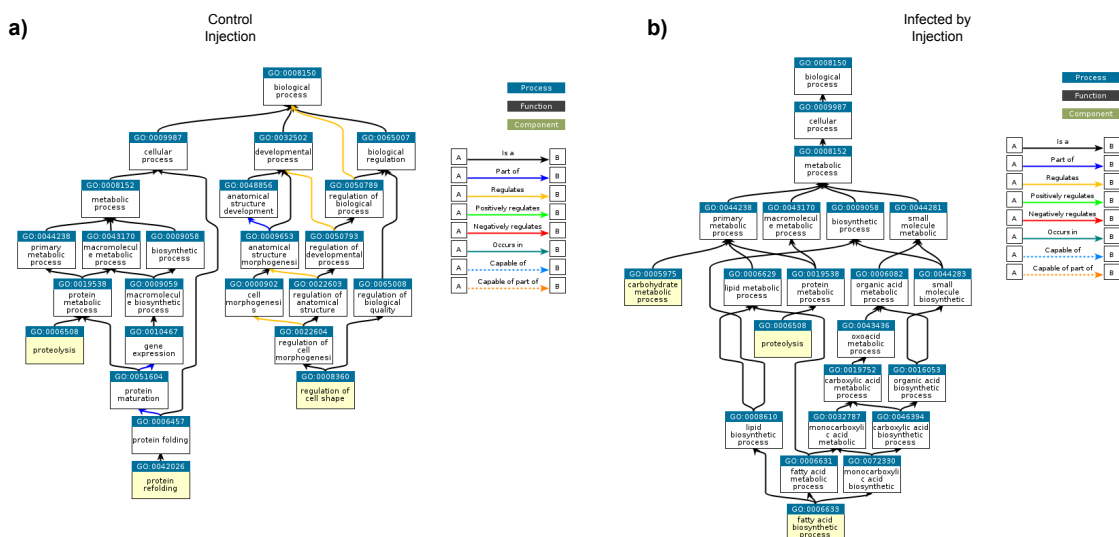

2 **Figure 1S. Functional analysis of microbial-derived peptides under injection-based conditions.**  
 3 **a)** Gene Ontology (GO) biological processes enriched in microbiota peptides from larvae injected with  
 4 PBS (control). Detected processes relate primarily to general metabolism and protein folding. **b)**  
 5 Functional network from larvae injected with *P. aeruginosa* reveals expanded enrichment of  
 6 processes including lipid, organic acid, and small molecule metabolism, as well as proteolysis and  
 7 biosynthetic activity. Diagrams reflect increased metabolic diversity and microbial activation under  
 8 systemic infection.

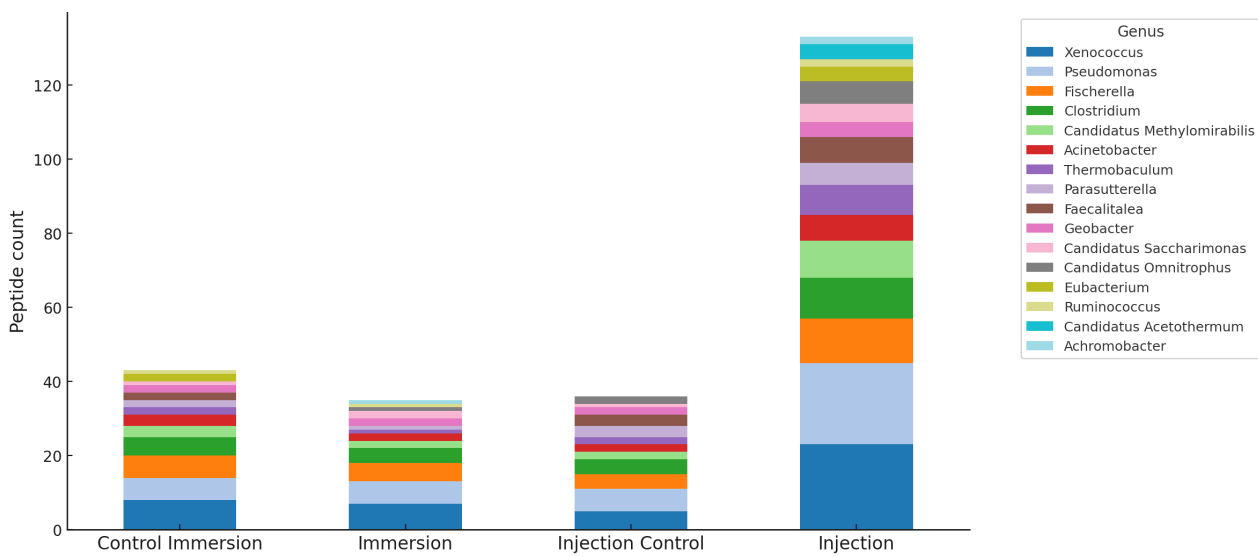

1 **Figure 2S. Genus-level peptide distribution across experimental conditions.** Stacked bar plot  
 2 showing the number of microbial-derived peptides assigned to selected genera in each condition:  
 3 control immersion, infected immersion, control injection, and infected injection. Each color represents  
 4 a different genus, with height proportional to peptide count. A notable increase in both genus richness  
 5 and peptide abundance is observed in the injection-infected group, reflecting taxonomic expansion of  
 6 the microbiota under systemic infection.
