# Supplementary material
Source: Royal Society of Chemistry journal article supplement (doi:10.1039/d6an00088f)
Supplement: d6an00088f2.xlsx [file d6an00088f2.xlsx]

## Sheet: Control Immersion - Control Inm
Control Inmersion
peptide	superkingdom	kingdom	subkingdom	superphylum	phylum	subphylum	superclass	class_	subclass	infraclass	superorder	order	suborder	infraorder	parvorder	superfamily	family	subfamily	tribe	subtribe	genus	subgenus	species_group	species_subgroup	species	subspecies	varietas	forma
AADIECHLQPTVIDCMR	Eukaryota	Metazoa			Chordata	Craniata	Actinopterygii	Actinopteri	Neopterygii	Teleostei	Cypriniphysae	Cypriniformes				Cyprinoidea	Cyprinidae				Danio				Danio rerio
AAVPSIQHCLDNCAK	Eukaryota	Metazoa			Chordata	Craniata	Actinopterygii	Actinopteri	Neopterygii	Teleostei	Cypriniphysae	Cypriniformes				Cyprinoidea	Cyprinidae				Danio				Danio rerio
AAVWVLDHYYTDFPVYNPALLNLPK	Eukaryota	Metazoa			Chordata	Craniata	Actinopterygii	Actinopteri	Neopterygii	Teleostei	Cypriniphysae	Cypriniformes				Cyprinoidea	Cyprinidae				Danio				Danio rerio
AAYQQATSKPLDVALK	Eukaryota	Metazoa			Chordata	Craniata	Actinopterygii	Actinopteri	Neopterygii	Teleostei	Cypriniphysae	Cypriniformes				Cyprinoidea	Cyprinidae				Danio				Danio rerio
ADQGLPVLGHVAAVLLCFEPSGSGVYGSK	Eukaryota	Metazoa			Chordata	Craniata	Actinopterygii	Actinopteri	Neopterygii	Teleostei	Cypriniphysae	Cypriniformes				Cyprinoidea	Cyprinidae				Danio				Danio rerio
AELGWITVTSILR	Eukaryota	Metazoa			Chordata	Craniata	Actinopterygii	Actinopteri	Neopterygii	Teleostei	Cypriniphysae	Cypriniformes				Cyprinoidea	Cyprinidae				Danio				Danio rerio
AENNSWVTPIADQFQLGISHVFEYIR	Eukaryota	Metazoa			Chordata	Craniata	Actinopterygii	Actinopteri	Neopterygii	Teleostei	Cypriniphysae	Cypriniformes				Cyprinoidea	Cyprinidae				Danio				Danio rerio
AEYEGDGEPTIFVAVAGR	Eukaryota	Metazoa			Chordata	Craniata	Actinopterygii	Actinopteri	Neopterygii	Teleostei	Cypriniphysae	Cypriniformes				Cyprinoidea	Cyprinidae				Danio				Danio rerio
AFSDPFVQNLKPSLVYDLAQMPSGTTGLK	Eukaryota	Metazoa			Chordata	Craniata	Actinopterygii	Actinopteri	Neopterygii	Teleostei	Cypriniphysae	Cypriniformes				Cyprinoidea	Cyprinidae				Danio				Danio rerio
AGDAVSIEAELLGKPQPEVK	Eukaryota	Metazoa			Chordata	Craniata	Actinopterygii	Actinopteri	Neopterygii	Teleostei	Cypriniphysae	Cypriniformes				Cyprinoidea	Cyprinidae				Danio				Danio rerio
AGVLALANLLK	Eukaryota	Metazoa			Chordata	Craniata	Actinopterygii	Actinopteri	Neopterygii	Teleostei	Cypriniphysae	Cypriniformes				Cyprinoidea	Cyprinidae				Danio				Danio rerio
AGVLLVEILK	Eukaryota	Metazoa			Chordata	Craniata	Actinopterygii	Actinopteri	Neopterygii	Teleostei	Cypriniphysae	Cypriniformes				Cyprinoidea	Cyprinidae				Danio				Danio rerio
AGVTHWHAGLIEAAHGLICR	Eukaryota	Metazoa			Chordata	Craniata	Actinopterygii	Actinopteri	Neopterygii	Teleostei	Cypriniphysae	Cypriniformes				Cyprinoidea	Cyprinidae				Danio				Danio rerio
AHDGGIYAVSWSPDSTQLISASGDR	Eukaryota	Metazoa			Chordata	Craniata	Actinopterygii	Actinopteri	Neopterygii	Teleostei	Cypriniphysae	Cypriniformes				Cyprinoidea	Cyprinidae				Danio				Danio rerio
AHLLSDVIQNLQLDSSYYHNR	Eukaryota	Metazoa			Chordata	Craniata	Actinopterygii	Actinopteri	Neopterygii	Teleostei	Cypriniphysae	Cypriniformes				Cyprinoidea	Cyprinidae				Danio				Danio rerio
AHYMTQPLAYHTPDCSCQGFIDLPEFPFALEPR	Eukaryota	Metazoa			Chordata	Craniata	Actinopterygii	Actinopteri	Neopterygii	Teleostei	Cypriniphysae	Cypriniformes				Cyprinoidea	Cyprinidae				Danio				Danio rerio
AIEQFGAVIEELLLK	Eukaryota	Metazoa			Chordata	Craniata	Actinopterygii	Actinopteri	Neopterygii	Teleostei	Cypriniphysae	Cypriniformes				Cyprinoidea	Cyprinidae				Danio				Danio rerio
ALPTDKPLASAYLK	Eukaryota	Metazoa			Chordata	Craniata	Actinopterygii	Actinopteri	Neopterygii	Teleostei	Cypriniphysae	Cypriniformes				Cyprinoidea	Cyprinidae				Danio				Danio rerio
ALQEGVAFQYAKPLLAAEVR	Eukaryota	Metazoa			Chordata	Craniata	Actinopterygii	Actinopteri	Neopterygii	Teleostei	Cypriniphysae	Cypriniformes				Cyprinoidea	Cyprinidae				Danio				Danio rerio
AISALCAVYEHWVPK	Eukaryota	Metazoa			Chordata	Craniata	Actinopterygii	Actinopteri	Neopterygii	Teleostei	Cypriniphysae	Cypriniformes				Cyprinoidea	Cyprinidae				Danio				Danio rerio
AISHLNNNFLFNQK	Eukaryota	Metazoa			Chordata	Craniata	Actinopterygii	Actinopteri	Neopterygii	Teleostei	Cypriniphysae	Cypriniformes				Cyprinoidea	Cyprinidae				Danio				Danio rerio
ALSLPFIDEFPFDLQHMK	Eukaryota	Metazoa			Chordata	Craniata	Actinopterygii	Actinopteri	Neopterygii	Teleostei	Cypriniphysae	Cypriniformes				Cyprinoidea	Cyprinidae				Danio				Danio rerio
ALVAEFLEQNYDAVFDNYEK	Eukaryota	Metazoa			Chordata	Craniata	Actinopterygii	Actinopteri	Neopterygii	Teleostei	Cypriniphysae	Cypriniformes				Cyprinoidea	Cyprinidae				Danio				Danio rerio
AMGSLFSLVCSLYK	Eukaryota	Metazoa			Chordata	Craniata	Actinopterygii	Actinopteri	Neopterygii	Teleostei	Cypriniphysae	Cypriniformes				Cyprinoidea	Cyprinidae				Danio				Danio rerio
ANSFIIGLEEELAPHLAFVGASVK	Eukaryota	Metazoa			Chordata	Craniata	Actinopterygii	Actinopteri	Neopterygii	Teleostei	Cypriniphysae	Cypriniformes				Cyprinoidea	Cyprinidae				Danio				Danio rerio
APYVGMVTKPSNEQSQDFSIHNEDFPALPGPNYK	Eukaryota	Metazoa			Chordata	Craniata	Actinopterygii	Actinopteri	Neopterygii	Teleostei	Cypriniphysae	Cypriniformes				Cyprinoidea	Cyprinidae				Danio				Danio rerio
AQELYEWIK	Eukaryota	Metazoa			Chordata	Craniata	Actinopterygii	Actinopteri	Neopterygii	Teleostei	Cypriniphysae	Cypriniformes				Cyprinoidea	Cyprinidae				Danio				Danio rerio
AQLTLQIIELPGPPASVK	Eukaryota	Metazoa			Chordata	Craniata	Actinopterygii	Actinopteri	Neopterygii	Teleostei	Cypriniphysae	Cypriniformes				Cyprinoidea	Cyprinidae				Danio				Danio rerio
ASDGHVLTEVNEAPTANDKPK	Eukaryota	Metazoa			Chordata	Craniata	Actinopterygii	Actinopteri	Neopterygii	Teleostei	Cypriniphysae	Cypriniformes				Cyprinoidea	Cyprinidae				Danio				Danio rerio
ASGEIVYCGLVFEK	Eukaryota	Metazoa			Chordata	Craniata	Actinopterygii	Actinopteri	Neopterygii	Teleostei	Cypriniphysae	Cypriniformes				Cyprinoidea	Cyprinidae				Danio				Danio rerio
ATAIIHSVGISK	Eukaryota	Metazoa			Chordata	Craniata	Actinopterygii	Actinopteri	Neopterygii	Teleostei	Cypriniphysae	Cypriniformes				Cyprinoidea	Cyprinidae				Danio				Danio rerio
ATELWQWLMTLEAEK	Eukaryota	Metazoa			Chordata	Craniata	Actinopterygii	Actinopteri	Neopterygii	Teleostei	Cypriniphysae	Cypriniformes				Cyprinoidea	Cyprinidae				Danio				Danio rerio
AVSAAAGIVTQALSDLLTHVR	Eukaryota	Metazoa			Chordata	Craniata	Actinopterygii	Actinopteri	Neopterygii	Teleostei	Cypriniphysae	Cypriniformes				Cyprinoidea	Cyprinidae				Danio				Danio rerio
AVYHQYTDATYR	Eukaryota	Metazoa			Chordata	Craniata	Actinopterygii	Actinopteri	Neopterygii	Teleostei	Cypriniphysae	Cypriniformes				Cyprinoidea	Cyprinidae				Danio				Danio rerio
AWQLEVVKPLEDK	Eukaryota	Metazoa			Chordata	Craniata	Actinopterygii	Actinopteri	Neopterygii	Teleostei	Cypriniphysae	Cypriniformes				Cyprinoidea	Cyprinidae				Danio				Danio rerio
CEEWTIAVPGPPHDLQVQEVR	Eukaryota	Metazoa			Chordata	Craniata	Actinopterygii	Actinopteri	Neopterygii	Teleostei	Cypriniphysae	Cypriniformes				Cyprinoidea	Cyprinidae				Danio				Danio rerio
CEHGTFGFDSCTGCR	Eukaryota	Metazoa			Chordata	Craniata	Actinopterygii	Actinopteri	Neopterygii	Teleostei	Cypriniphysae	Cypriniformes				Cyprinoidea	Cyprinidae				Danio				Danio rerio
CELMACEFAHK	Eukaryota	Metazoa			Chordata	Craniata	Actinopterygii	Actinopteri	Neopterygii	Teleostei	Cypriniphysae	Cypriniformes				Cyprinoidea	Cyprinidae				Danio				Danio rerio
CHDSAAYTSVVALLSDIVK	Eukaryota	Metazoa			Chordata	Craniata	Actinopterygii	Actinopteri	Neopterygii	Teleostei	Cypriniphysae	Cypriniformes				Cyprinoidea	Cyprinidae				Danio				Danio rerio
CLQPTSCQNIK	Eukaryota	Metazoa			Chordata	Craniata	Actinopterygii	Actinopteri	Neopterygii	Teleostei	Cypriniphysae	Cypriniformes				Cyprinoidea	Cyprinidae				Danio				Danio rerio
CSANISVHEEALK	Eukaryota	Metazoa			Chordata	Craniata	Actinopterygii	Actinopteri	Neopterygii	Teleostei	Cypriniphysae	Cypriniformes				Cyprinoidea	Cyprinidae				Danio				Danio rerio
CTFIDDFAPYHK	Eukaryota	Metazoa			Chordata	Craniata	Actinopterygii	Actinopteri	Neopterygii	Teleostei	Cypriniphysae	Cypriniformes				Cyprinoidea	Cyprinidae				Danio				Danio rerio
DAADIEWYHAANSK	Eukaryota	Metazoa			Chordata	Craniata	Actinopterygii	Actinopteri	Neopterygii	Teleostei	Cypriniphysae	Cypriniformes				Cyprinoidea	Cyprinidae				Danio				Danio rerio
DAIQLIIQIAAANGIGR	Eukaryota	Metazoa			Chordata	Craniata	Actinopterygii	Actinopteri	Neopterygii	Teleostei	Cypriniphysae	Cypriniformes				Cyprinoidea	Cyprinidae				Danio				Danio rerio
DATIEIITLDKPGPPTGPVR	Eukaryota	Metazoa			Chordata	Craniata	Actinopterygii	Actinopteri	Neopterygii	Teleostei	Cypriniphysae	Cypriniformes				Cyprinoidea	Cyprinidae				Danio				Danio rerio
DAVDKPDGLAVVGVFLK	Eukaryota	Metazoa			Chordata	Craniata	Actinopterygii	Actinopteri	Neopterygii	Teleostei	Cypriniphysae	Cypriniformes				Cyprinoidea	Cyprinidae				Danio				Danio rerio
DAVDLMQALGFR	Eukaryota	Metazoa			Chordata	Craniata	Actinopterygii	Actinopteri	Neopterygii	Teleostei	Cypriniphysae	Cypriniformes				Cyprinoidea	Cyprinidae				Danio				Danio rerio
DELFVLEQSHPQVVLTAGNDR	Eukaryota	Metazoa			Chordata	Craniata	Actinopterygii	Actinopteri	Neopterygii	Teleostei	Cypriniphysae	Cypriniformes				Cyprinoidea	Cyprinidae				Danio				Danio rerio
DELLPHLLPVLK	Eukaryota	Metazoa			Chordata	Craniata	Actinopterygii	Actinopteri	Neopterygii	Teleostei	Cypriniphysae	Cypriniformes				Cyprinoidea	Cyprinidae				Danio				Danio rerio
DEQLHSGLSELLTEVSNPK	Eukaryota	Metazoa			Chordata	Craniata	Actinopterygii	Actinopteri	Neopterygii	Teleostei	Cypriniphysae	Cypriniformes				Cyprinoidea	Cyprinidae				Danio				Danio rerio
DETEIAADCNHLLWNYK	Eukaryota	Metazoa			Chordata	Craniata	Actinopterygii	Actinopteri	Neopterygii	Teleostei	Cypriniphysae	Cypriniformes				Cyprinoidea	Cyprinidae				Danio				Danio rerio
DGELLFVHSAEK	Eukaryota	Metazoa			Chordata	Craniata	Actinopterygii	Actinopteri	Neopterygii	Teleostei	Cypriniphysae	Cypriniformes				Cyprinoidea	Cyprinidae				Danio				Danio rerio
DGMPLAFGPQIEVVHEGLDYYVLHVR	Eukaryota	Metazoa			Chordata	Craniata	Actinopterygii	Actinopteri	Neopterygii	Teleostei	Cypriniphysae	Cypriniformes				Cyprinoidea	Cyprinidae				Danio				Danio rerio
DGNQTIGTGLVTDILTITK	Eukaryota	Metazoa			Chordata	Craniata	Actinopterygii	Actinopteri	Neopterygii	Teleostei	Cypriniphysae	Cypriniformes				Cyprinoidea	Cyprinidae				Danio				Danio rerio
DGYFVSPCVLDNCR	Eukaryota	Metazoa			Chordata	Craniata	Actinopterygii	Actinopteri	Neopterygii	Teleostei	Cypriniphysae	Cypriniformes				Cyprinoidea	Cyprinidae				Danio				Danio rerio
DGYGDIIPPDSILHFDVLMLDIWNK	Eukaryota	Metazoa			Chordata	Craniata	Actinopterygii	Actinopteri	Neopterygii	Teleostei	Cypriniphysae	Cypriniformes				Cyprinoidea	Cyprinidae				Danio				Danio rerio
DHIFDALTNSYNQAR	Eukaryota	Metazoa			Chordata	Craniata	Actinopterygii	Actinopteri	Neopterygii	Teleostei	Cypriniphysae	Cypriniformes				Cyprinoidea	Cyprinidae				Danio				Danio rerio
DHQVPLDEFSQFIK	Eukaryota	Metazoa			Chordata	Craniata	Actinopterygii	Actinopteri	Neopterygii	Teleostei	Cypriniphysae	Cypriniformes				Cyprinoidea	Cyprinidae				Danio				Danio rerio
DHSKPIQEVLVELTDGGVDYSFECIGNVGIMR	Eukaryota	Metazoa			Chordata	Craniata	Actinopterygii	Actinopteri	Neopterygii	Teleostei	Cypriniphysae	Cypriniformes				Cyprinoidea	Cyprinidae				Danio				Danio rerio
DHVSITWDAPLIDGGSPVK	Eukaryota	Metazoa			Chordata	Craniata	Actinopterygii	Actinopteri	Neopterygii	Teleostei	Cypriniphysae	Cypriniformes				Cyprinoidea	Cyprinidae				Danio				Danio rerio
DLDGFLVGGASLKPEFIDIINAK	Eukaryota	Metazoa			Chordata	Craniata	Actinopterygii	Actinopteri	Neopterygii	Teleostei	Cypriniphysae	Cypriniformes				Cyprinoidea	Cyprinidae				Danio				Danio rerio
DLEIERPVAGSHINAR	Eukaryota	Metazoa			Chordata	Craniata	Actinopterygii	Actinopteri	Neopterygii	Teleostei	Cypriniphysae	Cypriniformes				Cyprinoidea	Cyprinidae				Danio				Danio rerio
DINEDEWTVCTPPTGVQATHFTVK	Eukaryota	Metazoa			Chordata	Craniata	Actinopterygii	Actinopteri	Neopterygii	Teleostei	Cypriniphysae	Cypriniformes				Cyprinoidea	Cyprinidae				Danio				Danio rerio
DIQPDIQHLLLFHNAASLGDVSR	Eukaryota	Metazoa			Chordata	Craniata	Actinopterygii	Actinopteri	Neopterygii	Teleostei	Cypriniphysae	Cypriniformes				Cyprinoidea	Cyprinidae				Danio				Danio rerio
DIYLPVTVPINPDGTFSINEDFLSWIHK	Eukaryota	Metazoa			Chordata	Craniata	Actinopterygii	Actinopteri	Neopterygii	Teleostei	Cypriniphysae	Cypriniformes				Cyprinoidea	Cyprinidae				Danio				Danio rerio
DMVHDDAPLK	Eukaryota	Metazoa			Chordata	Craniata	Actinopterygii	Actinopteri	Neopterygii	Teleostei	Cypriniphysae	Cypriniformes				Cyprinoidea	Cyprinidae				Danio				Danio rerio
DPNTYLFDHLLALKPVR	Eukaryota	Metazoa			Chordata	Craniata	Actinopterygii	Actinopteri	Neopterygii	Teleostei	Cypriniphysae	Cypriniformes				Cyprinoidea	Cyprinidae				Danio				Danio rerio
DPYYQWDHPDLR	Eukaryota	Metazoa			Chordata	Craniata	Actinopterygii	Actinopteri	Neopterygii	Teleostei	Cypriniphysae	Cypriniformes				Cyprinoidea	Cyprinidae				Danio				Danio rerio
DSITIHWLRPESDGGK	Eukaryota	Metazoa			Chordata	Craniata	Actinopterygii	Actinopteri	Neopterygii	Teleostei	Cypriniphysae	Cypriniformes				Cyprinoidea	Cyprinidae				Danio				Danio rerio
DYFGAHTYELLSNPGTFIHTNWTGHGGK	Eukaryota	Metazoa			Chordata	Craniata	Actinopterygii	Actinopteri	Neopterygii	Teleostei	Cypriniphysae	Cypriniformes				Cyprinoidea	Cyprinidae				Danio				Danio rerio
EACASFEPGSIQYRPVGIALDTK	Eukaryota	Metazoa			Chordata	Craniata	Actinopterygii	Actinopteri	Neopterygii	Teleostei	Cypriniphysae	Cypriniformes				Cyprinoidea	Cyprinidae				Danio				Danio rerio
EATTAEQLRPLFQQADAK	Eukaryota	Metazoa			Chordata	Craniata	Actinopterygii	Actinopteri	Neopterygii	Teleostei	Cypriniphysae	Cypriniformes				Cyprinoidea	Cyprinidae				Danio				Danio rerio
EDFHSVFSDHAQIK	Eukaryota	Metazoa			Chordata	Craniata	Actinopterygii	Actinopteri	Neopterygii	Teleostei	Cypriniphysae	Cypriniformes				Cyprinoidea	Cyprinidae				Danio				Danio rerio
EEATEEVLQILDLYAR	Eukaryota	Metazoa			Chordata	Craniata	Actinopterygii	Actinopteri	Neopterygii	Teleostei	Cypriniphysae	Cypriniformes				Cyprinoidea	Cyprinidae				Danio				Danio rerio
EEDAAQLK	Eukaryota	Metazoa			Chordata	Craniata	Actinopterygii	Actinopteri	Neopterygii	Teleostei	Cypriniphysae	Cypriniformes				Cyprinoidea	Cyprinidae				Danio				Danio rerio
EELEEIIEEVDEDGSGSIDFEEFLVMMVR	Eukaryota	Metazoa			Chordata	Craniata	Actinopterygii	Actinopteri	Neopterygii	Teleostei	Cypriniphysae	Cypriniformes				Cyprinoidea	Cyprinidae				Danio				Danio rerio
EFYYAEDYHQQYLSK	Eukaryota	Metazoa			Chordata	Craniata	Actinopterygii	Actinopteri	Neopterygii	Teleostei	Cypriniphysae	Cypriniformes				Cyprinoidea	Cyprinidae				Danio				Danio rerio
EGHLDVTTVLLEAGAAHSLATK	Eukaryota	Metazoa			Chordata	Craniata	Actinopterygii	Actinopteri	Neopterygii	Teleostei	Cypriniphysae	Cypriniformes				Cyprinoidea	Cyprinidae				Danio				Danio rerio
EGVSYEIHYR	Eukaryota	Metazoa			Chordata	Craniata	Actinopterygii	Actinopteri	Neopterygii	Teleostei	Cypriniphysae	Cypriniformes				Cyprinoidea	Cyprinidae				Danio				Danio rerio
EHHTDQYSGDQLIIR	Eukaryota	Metazoa			Chordata	Craniata	Actinopterygii	Actinopteri	Neopterygii	Teleostei	Cypriniphysae	Cypriniformes				Cyprinoidea	Cyprinidae				Danio				Danio rerio
EHPDVQGQPIEDLYESVNDR	Eukaryota	Metazoa			Chordata	Craniata	Actinopterygii	Actinopteri	Neopterygii	Teleostei	Cypriniphysae	Cypriniformes				Cyprinoidea	Cyprinidae				Danio				Danio rerio
EHQNAAVLTELLSETCTALASPLENK	Eukaryota	Metazoa			Chordata	Craniata	Actinopterygii	Actinopteri	Neopterygii	Teleostei	Cypriniphysae	Cypriniformes				Cyprinoidea	Cyprinidae				Danio				Danio rerio
EIAEDLADK	Eukaryota	Metazoa			Chordata	Craniata	Actinopterygii	Actinopteri	Neopterygii	Teleostei	Cypriniphysae	Cypriniformes				Cyprinoidea	Cyprinidae				Danio				Danio rerio
ELEEIHGIHCNMTLLFSFAQAVACAEAR	Eukaryota	Metazoa			Chordata	Craniata	Actinopterygii	Actinopteri	Neopterygii	Teleostei	Cypriniphysae	Cypriniformes				Cyprinoidea	Cyprinidae				Danio				Danio rerio
ELESVCQDVLTLLDQYLIK	Eukaryota	Metazoa			Chordata	Craniata	Actinopterygii	Actinopteri	Neopterygii	Teleostei	Cypriniphysae	Cypriniformes				Cyprinoidea	Cyprinidae				Danio				Danio rerio
ELGLSLNQK	Eukaryota	Metazoa			Chordata	Craniata	Actinopterygii	Actinopteri	Neopterygii	Teleostei	Cypriniphysae	Cypriniformes				Cyprinoidea	Cyprinidae				Danio				Danio rerio
EILKPEIAIGLLEAQAATGFIVDPVR	Eukaryota	Metazoa			Chordata	Craniata	Actinopterygii	Actinopteri	Neopterygii	Teleostei	Cypriniphysae	Cypriniformes				Cyprinoidea	Cyprinidae				Danio				Danio rerio
ELPISFVTPLADVHVYEK	Eukaryota	Metazoa			Chordata	Craniata	Actinopterygii	Actinopteri	Neopterygii	Teleostei	Cypriniphysae	Cypriniformes				Cyprinoidea	Cyprinidae				Danio				Danio rerio
EISTVFPDAYIHLGGDEVDFSCWK	Eukaryota	Metazoa			Chordata	Craniata	Actinopterygii	Actinopteri	Neopterygii	Teleostei	Cypriniphysae	Cypriniformes				Cyprinoidea	Cyprinidae				Danio				Danio rerio
EPDPFSLTIGK	Eukaryota	Metazoa			Chordata	Craniata	Actinopterygii	Actinopteri	Neopterygii	Teleostei	Cypriniphysae	Cypriniformes				Cyprinoidea	Cyprinidae				Danio				Danio rerio
ESHMSENCPPLDLPGSVQELQDLCK	Eukaryota	Metazoa			Chordata	Craniata	Actinopterygii	Actinopteri	Neopterygii	Teleostei	Cypriniphysae	Cypriniformes				Cyprinoidea	Cyprinidae				Danio				Danio rerio
ESIISQYGEQISHVYFNK	Eukaryota	Metazoa			Chordata	Craniata	Actinopterygii	Actinopteri	Neopterygii	Teleostei	Cypriniphysae	Cypriniformes				Cyprinoidea	Cyprinidae				Danio				Danio rerio
ETSGSLQEILLAVVK	Eukaryota	Metazoa			Chordata	Craniata	Actinopterygii	Actinopteri	Neopterygii	Teleostei	Cypriniphysae	Cypriniformes				Cyprinoidea	Cyprinidae				Danio				Danio rerio
EVHEVLLPGLQTLHDALAAK	Eukaryota	Metazoa			Chordata	Craniata	Actinopterygii	Actinopteri	Neopterygii	Teleostei	Cypriniphysae	Cypriniformes				Cyprinoidea	Cyprinidae				Danio				Danio rerio
EVLEALGETLVNKPK	Eukaryota	Metazoa			Chordata	Craniata	Actinopterygii	Actinopteri	Neopterygii	Teleostei	Cypriniphysae	Cypriniformes				Cyprinoidea	Cyprinidae				Danio				Danio rerio
EVLNTINALLGQLGNIDK	Eukaryota	Metazoa			Chordata	Craniata	Actinopterygii	Actinopteri	Neopterygii	Teleostei	Cypriniphysae	Cypriniformes				Cyprinoidea	Cyprinidae				Danio				Danio rerio
EWNNYSIVTDTPVYVTAILGHTWASELNYR	Eukaryota	Metazoa			Chordata	Craniata	Actinopterygii	Actinopteri	Neopterygii	Teleostei	Cypriniphysae	Cypriniformes				Cyprinoidea	Cyprinidae				Danio				Danio rerio
EWTVAVPGPPHGLR	Eukaryota	Metazoa			Chordata	Craniata	Actinopterygii	Actinopteri	Neopterygii	Teleostei	Cypriniphysae	Cypriniformes				Cyprinoidea	Cyprinidae				Danio				Danio rerio
EWVDAHDPGALVIPLSGGFESK	Eukaryota	Metazoa			Chordata	Craniata	Actinopterygii	Actinopteri	Neopterygii	Teleostei	Cypriniphysae	Cypriniformes				Cyprinoidea	Cyprinidae				Danio				Danio rerio
EYGCHAQTPQIQSIR	Eukaryota	Metazoa			Chordata	Craniata	Actinopterygii	Actinopteri	Neopterygii	Teleostei	Cypriniphysae	Cypriniformes				Cyprinoidea	Cyprinidae				Danio				Danio rerio
FAHSVEDLLQEGEEADDDDIYNVLSTLK	Eukaryota	Metazoa			Chordata	Craniata	Actinopterygii	Actinopteri	Neopterygii	Teleostei	Cypriniphysae	Cypriniformes				Cyprinoidea	Cyprinidae				Danio				Danio rerio
FALFDLAEDK	Eukaryota	Metazoa			Chordata	Craniata	Actinopterygii	Actinopteri	Neopterygii	Teleostei	Cypriniphysae	Cypriniformes				Cyprinoidea	Cyprinidae				Danio				Danio rerio
FDNLFFIEVPK	Eukaryota	Metazoa			Chordata	Craniata	Actinopterygii	Actinopteri	Neopterygii	Teleostei	Cypriniphysae	Cypriniformes				Cyprinoidea	Cyprinidae				Danio				Danio rerio
FEAIWAQFK	Eukaryota	Metazoa			Chordata	Craniata	Actinopterygii	Actinopteri	Neopterygii	Teleostei	Cypriniphysae	Cypriniformes				Cyprinoidea	Cyprinidae				Danio				Danio rerio
FEEMQSTAGQYGDDLR	Eukaryota	Metazoa			Chordata	Craniata	Actinopterygii	Actinopteri	Neopterygii	Teleostei	Cypriniphysae	Cypriniformes				Cyprinoidea	Cyprinidae				Danio				Danio rerio
FEESVVPHTGSLSVTGLR	Eukaryota	Metazoa			Chordata	Craniata	Actinopterygii	Actinopteri	Neopterygii	Teleostei	Cypriniphysae	Cypriniformes				Cyprinoidea	Cyprinidae				Danio				Danio rerio
FFPDSDATTYAQHVFR	Eukaryota	Metazoa			Chordata	Craniata	Actinopterygii	Actinopteri	Neopterygii	Teleostei	Cypriniphysae	Cypriniformes				Cyprinoidea	Cyprinidae				Danio				Danio rerio
FGAILAQGVLDAGGR	Eukaryota	Metazoa			Chordata	Craniata	Actinopterygii	Actinopteri	Neopterygii	Teleostei	Cypriniphysae	Cypriniformes				Cyprinoidea	Cyprinidae				Danio				Danio rerio
FLGVIGDLR	Eukaryota	Metazoa			Chordata	Craniata	Actinopterygii	Actinopteri	Neopterygii	Teleostei	Cypriniphysae	Cypriniformes				Cyprinoidea	Cyprinidae				Danio				Danio rerio
FIQDSAAHSFLAEHK	Eukaryota	Metazoa			Chordata	Craniata	Actinopterygii	Actinopteri	Neopterygii	Teleostei	Cypriniphysae	Cypriniformes				Cyprinoidea	Cyprinidae				Danio				Danio rerio
FNLPADLLSLELAK	Eukaryota	Metazoa			Chordata	Craniata	Actinopterygii	Actinopteri	Neopterygii	Teleostei	Cypriniphysae	Cypriniformes				Cyprinoidea	Cyprinidae				Danio				Danio rerio
FSHDVSELGLDGSSGELPLVGIR	Eukaryota	Metazoa			Chordata	Craniata	Actinopterygii	Actinopteri	Neopterygii	Teleostei	Cypriniphysae	Cypriniformes				Cyprinoidea	Cyprinidae				Danio				Danio rerio
FSSALWENEGVLEEFLK	Eukaryota	Metazoa			Chordata	Craniata	Actinopterygii	Actinopteri	Neopterygii	Teleostei	Cypriniphysae	Cypriniformes				Cyprinoidea	Cyprinidae				Danio				Danio rerio
FVGEFTGHGGVK	Eukaryota	Metazoa			Chordata	Craniata	Actinopterygii	Actinopteri	Neopterygii	Teleostei	Cypriniphysae	Cypriniformes				Cyprinoidea	Cyprinidae				Danio				Danio rerio
FVQFPGLLK	Eukaryota	Metazoa			Chordata	Craniata	Actinopterygii	Actinopteri	Neopterygii	Teleostei	Cypriniphysae	Cypriniformes				Cyprinoidea	Cyprinidae				Danio				Danio rerio
GAAIEIPAEIVGLPLPTFEWTK	Eukaryota	Metazoa			Chordata	Craniata	Actinopterygii	Actinopteri	Neopterygii	Teleostei	Cypriniphysae	Cypriniformes				Cyprinoidea	Cyprinidae				Danio				Danio rerio
GAGTTEDTLIEILASR	Eukaryota	Metazoa			Chordata	Craniata	Actinopterygii	Actinopteri	Neopterygii	Teleostei	Cypriniphysae	Cypriniformes				Cyprinoidea	Cyprinidae				Danio				Danio rerio
GCGWIPHESVEVVK	Eukaryota	Metazoa			Chordata	Craniata	Actinopterygii	Actinopteri	Neopterygii	Teleostei	Cypriniphysae	Cypriniformes				Cyprinoidea	Cyprinidae				Danio				Danio rerio
GDLLPSALIWITSR	Eukaryota	Metazoa			Chordata	Craniata	Actinopterygii	Actinopteri	Neopterygii	Teleostei	Cypriniphysae	Cypriniformes				Cyprinoidea	Cyprinidae				Danio				Danio rerio
GEAVWFGCDVGK	Eukaryota	Metazoa			Chordata	Craniata	Actinopterygii	Actinopteri	Neopterygii	Teleostei	Cypriniphysae	Cypriniformes				Cyprinoidea	Cyprinidae				Danio				Danio rerio
GEIGVLVCCGNMLVTGSNTK	Eukaryota	Metazoa			Chordata	Craniata	Actinopterygii	Actinopteri	Neopterygii	Teleostei	Cypriniphysae	Cypriniformes				Cyprinoidea	Cyprinidae				Danio				Danio rerio
GEYYFFIDEHTK	Eukaryota	Metazoa			Chordata	Craniata	Actinopterygii	Actinopteri	Neopterygii	Teleostei	Cypriniphysae	Cypriniformes				Cyprinoidea	Cyprinidae				Danio				Danio rerio
GGHFAAFEEPQLLAQDIIQFAEK	Eukaryota	Metazoa			Chordata	Craniata	Actinopterygii	Actinopteri	Neopterygii	Teleostei	Cypriniphysae	Cypriniformes				Cyprinoidea	Cyprinidae				Danio				Danio rerio
GGLLTLSELHAFMLR	Eukaryota	Metazoa			Chordata	Craniata	Actinopterygii	Actinopteri	Neopterygii	Teleostei	Cypriniphysae	Cypriniformes				Cyprinoidea	Cyprinidae				Danio				Danio rerio
GHEGSVGALYWDPVHR	Eukaryota	Metazoa			Chordata	Craniata	Actinopterygii	Actinopteri	Neopterygii	Teleostei	Cypriniphysae	Cypriniformes				Cyprinoidea	Cyprinidae				Danio				Danio rerio
GHFAELESLLELLNTSQFSSR	Eukaryota	Metazoa			Chordata	Craniata	Actinopterygii	Actinopteri	Neopterygii	Teleostei	Cypriniphysae	Cypriniformes				Cyprinoidea	Cyprinidae				Danio				Danio rerio
GHYIGSYEDIFTVHCHR	Eukaryota	Metazoa			Chordata	Craniata	Actinopterygii	Actinopteri	Neopterygii	Teleostei	Cypriniphysae	Cypriniformes				Cyprinoidea	Cyprinidae				Danio				Danio rerio
GLEAVNIWLDK	Eukaryota	Metazoa			Chordata	Craniata	Actinopterygii	Actinopteri	Neopterygii	Teleostei	Cypriniphysae	Cypriniformes				Cyprinoidea	Cyprinidae				Danio				Danio rerio
GLFEEVPEPLSEVEK	Eukaryota	Metazoa			Chordata	Craniata	Actinopterygii	Actinopteri	Neopterygii	Teleostei	Cypriniphysae	Cypriniformes				Cyprinoidea	Cyprinidae				Danio				Danio rerio
GLFLGDLITQLEDCTVR	Eukaryota	Metazoa			Chordata	Craniata	Actinopterygii	Actinopteri	Neopterygii	Teleostei	Cypriniphysae	Cypriniformes				Cyprinoidea	Cyprinidae				Danio				Danio rerio
GLGALNLLDLSHNFLDTFPK	Eukaryota	Metazoa			Chordata	Craniata	Actinopterygii	Actinopteri	Neopterygii	Teleostei	Cypriniphysae	Cypriniformes				Cyprinoidea	Cyprinidae				Danio				Danio rerio
GLGTNEAVLSEILGTR	Eukaryota	Metazoa			Chordata	Craniata	Actinopterygii	Actinopteri	Neopterygii	Teleostei	Cypriniphysae	Cypriniformes				Cyprinoidea	Cyprinidae				Danio				Danio rerio
GLSPVAAYLHIPDIIK	Eukaryota	Metazoa			Chordata	Craniata	Actinopterygii	Actinopteri	Neopterygii	Teleostei	Cypriniphysae	Cypriniformes				Cyprinoidea	Cyprinidae				Danio				Danio rerio
GLWEEVAPTLPDNHFDGILYDTYPLSEETWHTHQFNFIK	Eukaryota	Metazoa			Chordata	Craniata	Actinopterygii	Actinopteri	Neopterygii	Teleostei	Cypriniphysae	Cypriniformes				Cyprinoidea	Cyprinidae				Danio				Danio rerio
GNYCGHNEWQAQNPHIQSIR	Eukaryota	Metazoa			Chordata	Craniata	Actinopterygii	Actinopteri	Neopterygii	Teleostei	Cypriniphysae	Cypriniformes				Cyprinoidea	Cyprinidae				Danio				Danio rerio
GQQPPYLHLAELTASQFLDIWK	Eukaryota	Metazoa			Chordata	Craniata	Actinopterygii	Actinopteri	Neopterygii	Teleostei	Cypriniphysae	Cypriniformes				Cyprinoidea	Cyprinidae				Danio				Danio rerio
GSDHAASLEPEELAELVR	Eukaryota	Metazoa			Chordata	Craniata	Actinopterygii	Actinopteri	Neopterygii	Teleostei	Cypriniphysae	Cypriniformes				Cyprinoidea	Cyprinidae				Danio				Danio rerio
GSIPEHITNLSPSHTR	Eukaryota	Metazoa			Chordata	Craniata	Actinopterygii	Actinopteri	Neopterygii	Teleostei	Cypriniphysae	Cypriniformes				Cyprinoidea	Cyprinidae				Danio				Danio rerio
GVTGHEVCQYFWDTDVR	Eukaryota	Metazoa			Chordata	Craniata	Actinopterygii	Actinopteri	Neopterygii	Teleostei	Cypriniphysae	Cypriniformes				Cyprinoidea	Cyprinidae				Danio				Danio rerio
GYDLKPDAISILAAK	Eukaryota	Metazoa			Chordata	Craniata	Actinopterygii	Actinopteri	Neopterygii	Teleostei	Cypriniphysae	Cypriniformes				Cyprinoidea	Cyprinidae				Danio				Danio rerio
HAVVGSTGHQLPLFTSVDAQGILGADGR	Eukaryota	Metazoa			Chordata	Craniata	Actinopterygii	Actinopteri	Neopterygii	Teleostei	Cypriniphysae	Cypriniformes				Cyprinoidea	Cyprinidae				Danio				Danio rerio
HCTAVPTCPAELLRPIHEIATEAISK	Eukaryota	Metazoa			Chordata	Craniata	Actinopterygii	Actinopteri	Neopterygii	Teleostei	Cypriniphysae	Cypriniformes				Cyprinoidea	Cyprinidae				Danio				Danio rerio
HCVAVPSCPAELLKPIHEITAEAISK	Eukaryota	Metazoa			Chordata	Craniata	Actinopterygii	Actinopteri	Neopterygii	Teleostei	Cypriniphysae	Cypriniformes				Cyprinoidea	Cyprinidae				Danio				Danio rerio
HCVAVPTCPAELLRPIHETATEAISK	Eukaryota	Metazoa			Chordata	Craniata	Actinopterygii	Actinopteri	Neopterygii	Teleostei	Cypriniphysae	Cypriniformes				Cyprinoidea	Cyprinidae				Danio				Danio rerio
HELLHNVNDIVAVGTESFYATNDHYFTNDILK	Eukaryota	Metazoa			Chordata	Craniata	Actinopterygii	Actinopteri	Neopterygii	Teleostei	Cypriniphysae	Cypriniformes				Cyprinoidea	Cyprinidae				Danio				Danio rerio
HELLHSVNDIVAVGTESFYATNDHYFTNDILK	Eukaryota	Metazoa			Chordata	Craniata	Actinopterygii	Actinopteri	Neopterygii	Teleostei	Cypriniphysae	Cypriniformes				Cyprinoidea	Cyprinidae				Danio				Danio rerio
HFSAIINPPQACILAVGGSEK	Eukaryota	Metazoa			Chordata	Craniata	Actinopterygii	Actinopteri	Neopterygii	Teleostei	Cypriniphysae	Cypriniformes				Cyprinoidea	Cyprinidae				Danio				Danio rerio
HGIDGEGIILFR	Eukaryota	Metazoa			Chordata	Craniata	Actinopterygii	Actinopteri	Neopterygii	Teleostei	Cypriniphysae	Cypriniformes				Cyprinoidea	Cyprinidae				Danio				Danio rerio
HGTTVINGVLTAVGLMDDLK	Eukaryota	Metazoa			Chordata	Craniata	Actinopterygii	Actinopteri	Neopterygii	Teleostei	Cypriniphysae	Cypriniformes				Cyprinoidea	Cyprinidae				Danio				Danio rerio
HHPDDVEPSLLK	Eukaryota	Metazoa			Chordata	Craniata	Actinopterygii	Actinopteri	Neopterygii	Teleostei	Cypriniphysae	Cypriniformes				Cyprinoidea	Cyprinidae				Danio				Danio rerio
HHTSSLEIFSPAVADSGEYTCK	Eukaryota	Metazoa			Chordata	Craniata	Actinopterygii	Actinopteri	Neopterygii	Teleostei	Cypriniphysae	Cypriniformes				Cyprinoidea	Cyprinidae				Danio				Danio rerio
HLTTLVDDIWYYAGDR	Eukaryota	Metazoa			Chordata	Craniata	Actinopterygii	Actinopteri	Neopterygii	Teleostei	Cypriniphysae	Cypriniformes				Cyprinoidea	Cyprinidae				Danio				Danio rerio
HSQAFDELNEQLEQVK	Eukaryota	Metazoa			Chordata	Craniata	Actinopterygii	Actinopteri	Neopterygii	Teleostei	Cypriniphysae	Cypriniformes				Cyprinoidea	Cyprinidae				Danio				Danio rerio
HTVLLLPGALGSGETDFGPQLSALDSSR	Eukaryota	Metazoa			Chordata	Craniata	Actinopterygii	Actinopteri	Neopterygii	Teleostei	Cypriniphysae	Cypriniformes				Cyprinoidea	Cyprinidae				Danio				Danio rerio
HVSVEALDFIDR	Eukaryota	Metazoa			Chordata	Craniata	Actinopterygii	Actinopteri	Neopterygii	Teleostei	Cypriniphysae	Cypriniformes				Cyprinoidea	Cyprinidae				Danio				Danio rerio
HVTLEFITVGQDNGPLELSTLECLANAADGVR	Eukaryota	Metazoa			Chordata	Craniata	Actinopterygii	Actinopteri	Neopterygii	Teleostei	Cypriniphysae	Cypriniformes				Cyprinoidea	Cyprinidae				Danio				Danio rerio
HYFDLIIVNDNLDCAFEK	Eukaryota	Metazoa			Chordata	Craniata	Actinopterygii	Actinopteri	Neopterygii	Teleostei	Cypriniphysae	Cypriniformes				Cyprinoidea	Cyprinidae				Danio				Danio rerio
KPLNPSENVIIENTESYTHLVIR	Eukaryota	Metazoa			Chordata	Craniata	Actinopterygii	Actinopteri	Neopterygii	Teleostei	Cypriniphysae	Cypriniformes				Cyprinoidea	Cyprinidae				Danio				Danio rerio
KPPPVLPEFQTR	Eukaryota	Metazoa			Chordata	Craniata	Actinopterygii	Actinopteri	Neopterygii	Teleostei	Cypriniphysae	Cypriniformes				Cyprinoidea	Cyprinidae				Danio				Danio rerio
IAGGLASELEPVVDK	Eukaryota	Metazoa			Chordata	Craniata	Actinopterygii	Actinopteri	Neopterygii	Teleostei	Cypriniphysae	Cypriniformes				Cyprinoidea	Cyprinidae				Danio				Danio rerio
LAQDYLHIVDSLEIPTPDPQYLQDLVK	Eukaryota	Metazoa			Chordata	Craniata	Actinopterygii	Actinopteri	Neopterygii	Teleostei	Cypriniphysae	Cypriniformes				Cyprinoidea	Cyprinidae				Danio				Danio rerio
LAWVSHDSTVTVVDPTISSTPSQLK	Eukaryota	Metazoa			Chordata	Craniata	Actinopterygii	Actinopteri	Neopterygii	Teleostei	Cypriniphysae	Cypriniformes				Cyprinoidea	Cyprinidae				Danio				Danio rerio
LDGSEDQVLITEHGDLGHGR	Eukaryota	Metazoa			Chordata	Craniata	Actinopterygii	Actinopteri	Neopterygii	Teleostei	Cypriniphysae	Cypriniformes				Cyprinoidea	Cyprinidae				Danio				Danio rerio
LDGSEESVLITEHGDLGQGR	Eukaryota	Metazoa			Chordata	Craniata	Actinopterygii	Actinopteri	Neopterygii	Teleostei	Cypriniphysae	Cypriniformes				Cyprinoidea	Cyprinidae				Danio				Danio rerio
IDLRPILTEGIPVLGSFLR	Eukaryota	Metazoa			Chordata	Craniata	Actinopterygii	Actinopteri	Neopterygii	Teleostei	Cypriniphysae	Cypriniformes				Cyprinoidea	Cyprinidae				Danio				Danio rerio
LDSGLDNVSLLIDHVCSR	Eukaryota	Metazoa			Chordata	Craniata	Actinopterygii	Actinopteri	Neopterygii	Teleostei	Cypriniphysae	Cypriniformes				Cyprinoidea	Cyprinidae				Danio				Danio rerio
IEGLHEEIAFLR	Eukaryota	Metazoa			Chordata	Craniata	Actinopterygii	Actinopteri	Neopterygii	Teleostei	Cypriniphysae	Cypriniformes				Cyprinoidea	Cyprinidae				Danio				Danio rerio
LEPYFTSMHER	Eukaryota	Metazoa			Chordata	Craniata	Actinopterygii	Actinopteri	Neopterygii	Teleostei	Cypriniphysae	Cypriniformes				Cyprinoidea	Cyprinidae				Danio				Danio rerio
LEQALQSLLESLTCPPYTPTQHLER	Eukaryota	Metazoa			Chordata	Craniata	Actinopterygii	Actinopteri	Neopterygii	Teleostei	Cypriniphysae	Cypriniformes				Cyprinoidea	Cyprinidae				Danio				Danio rerio
IFLDLLIPDQHVQFINR	Eukaryota	Metazoa			Chordata	Craniata	Actinopterygii	Actinopteri	Neopterygii	Teleostei	Cypriniphysae	Cypriniformes				Cyprinoidea	Cyprinidae				Danio				Danio rerio
LFNHVNDDTGFK	Eukaryota	Metazoa			Chordata	Craniata	Actinopterygii	Actinopteri	Neopterygii	Teleostei	Cypriniphysae	Cypriniformes				Cyprinoidea	Cyprinidae				Danio				Danio rerio
LFSDANLCAIHAK	Eukaryota	Metazoa			Chordata	Craniata	Actinopterygii	Actinopteri	Neopterygii	Teleostei	Cypriniphysae	Cypriniformes				Cyprinoidea	Cyprinidae				Danio				Danio rerio
LGGTVLDTVTDWIR	Eukaryota	Metazoa			Chordata	Craniata	Actinopterygii	Actinopteri	Neopterygii	Teleostei	Cypriniphysae	Cypriniformes				Cyprinoidea	Cyprinidae				Danio				Danio rerio
IGVDEFALLVK	Eukaryota	Metazoa			Chordata	Craniata	Actinopterygii	Actinopteri	Neopterygii	Teleostei	Cypriniphysae	Cypriniformes				Cyprinoidea	Cyprinidae				Danio				Danio rerio
IGVELIAASTDSHFSHLAWINTPR	Eukaryota	Metazoa			Chordata	Craniata	Actinopterygii	Actinopteri	Neopterygii	Teleostei	Cypriniphysae	Cypriniformes				Cyprinoidea	Cyprinidae				Danio				Danio rerio
LGVEMSGSIITNIFNTVDSDNQDHFFSAFLK	Eukaryota	Metazoa			Chordata	Craniata	Actinopterygii	Actinopteri	Neopterygii	Teleostei	Cypriniphysae	Cypriniformes				Cyprinoidea	Cyprinidae				Danio				Danio rerio
IHGLIVQLPLDSIHTINTER	Eukaryota	Metazoa			Chordata	Craniata	Actinopterygii	Actinopteri	Neopterygii	Teleostei	Cypriniphysae	Cypriniformes				Cyprinoidea	Cyprinidae				Danio				Danio rerio
LHPLSPVPSDIEISR	Eukaryota	Metazoa			Chordata	Craniata	Actinopterygii	Actinopteri	Neopterygii	Teleostei	Cypriniphysae	Cypriniformes				Cyprinoidea	Cyprinidae				Danio				Danio rerio
IHPVVLASIVDSYER	Eukaryota	Metazoa			Chordata	Craniata	Actinopterygii	Actinopteri	Neopterygii	Teleostei	Cypriniphysae	Cypriniformes				Cyprinoidea	Cyprinidae				Danio				Danio rerio
LKPDLVDFTFEGK	Eukaryota	Metazoa			Chordata	Craniata	Actinopterygii	Actinopteri	Neopterygii	Teleostei	Cypriniphysae	Cypriniformes				Cyprinoidea	Cyprinidae				Danio				Danio rerio
LLAHPSPDTGLLAFFSSL	Eukaryota	Metazoa			Chordata	Craniata	Actinopterygii	Actinopteri	Neopterygii	Teleostei	Cypriniphysae	Cypriniformes				Cyprinoidea	Cyprinidae				Danio				Danio rerio
LLDCQYATGGIIDPVNSHHVPVQLACTQGQLDEDLSK	Eukaryota	Metazoa			Chordata	Craniata	Actinopterygii	Actinopteri	Neopterygii	Teleostei	Cypriniphysae	Cypriniformes				Cyprinoidea	Cyprinidae				Danio				Danio rerio
IIDEDNSGFIEEAELK	Eukaryota	Metazoa			Chordata	Craniata	Actinopterygii	Actinopteri	Neopterygii	Teleostei	Cypriniphysae	Cypriniformes				Cyprinoidea	Cyprinidae				Danio				Danio rerio
ILESVGIEADDVR	Eukaryota	Metazoa			Chordata	Craniata	Actinopterygii	Actinopteri	Neopterygii	Teleostei	Cypriniphysae	Cypriniformes				Cyprinoidea	Cyprinidae				Danio				Danio rerio
IIEVVDSITTTAQSHQR	Eukaryota	Metazoa			Chordata	Craniata	Actinopterygii	Actinopteri	Neopterygii	Teleostei	Cypriniphysae	Cypriniformes				Cyprinoidea	Cyprinidae				Danio				Danio rerio
IIIGVAFPTAR	Eukaryota	Metazoa			Chordata	Craniata	Actinopterygii	Actinopteri	Neopterygii	Teleostei	Cypriniphysae	Cypriniformes				Cyprinoidea	Cyprinidae				Danio				Danio rerio
LIIQSVESDLAGEYIAVIGHLQCSAHLQVEHLR	Eukaryota	Metazoa			Chordata	Craniata	Actinopterygii	Actinopteri	Neopterygii	Teleostei	Cypriniphysae	Cypriniformes				Cyprinoidea	Cyprinidae				Danio				Danio rerio
IINHNLLVSLAMMFPDDFTPEVHVSVDK	Eukaryota	Metazoa			Chordata	Craniata	Actinopterygii	Actinopteri	Neopterygii	Teleostei	Cypriniphysae	Cypriniformes				Cyprinoidea	Cyprinidae				Danio				Danio rerio
LLSTEATQTITYHCK	Eukaryota	Metazoa			Chordata	Craniata	Actinopterygii	Actinopteri	Neopterygii	Teleostei	Cypriniphysae	Cypriniformes				Cyprinoidea	Cyprinidae				Danio				Danio rerio
IITLPPFLGYGENGDGSDIPAQASLVFDVVLLDLHNPK	Eukaryota	Metazoa			Chordata	Craniata	Actinopterygii	Actinopteri	Neopterygii	Teleostei	Cypriniphysae	Cypriniformes				Cyprinoidea	Cyprinidae				Danio				Danio rerio
LLWTVVEPK	Eukaryota	Metazoa			Chordata	Craniata	Actinopterygii	Actinopteri	Neopterygii	Teleostei	Cypriniphysae	Cypriniformes				Cyprinoidea	Cyprinidae				Danio				Danio rerio
LMELHGEGGSTSAAAKPAEGDTGAK	Eukaryota	Metazoa			Chordata	Craniata	Actinopterygii	Actinopteri	Neopterygii	Teleostei	Cypriniphysae	Cypriniformes				Cyprinoidea	Cyprinidae				Danio				Danio rerio
LNATISDLIMGNTYIFR	Eukaryota	Metazoa			Chordata	Craniata	Actinopterygii	Actinopteri	Neopterygii	Teleostei	Cypriniphysae	Cypriniformes				Cyprinoidea	Cyprinidae				Danio				Danio rerio
INGLEVPISSLPYQHPSGSIQIR	Eukaryota	Metazoa			Chordata	Craniata	Actinopterygii	Actinopteri	Neopterygii	Teleostei	Cypriniphysae	Cypriniformes				Cyprinoidea	Cyprinidae				Danio				Danio rerio
LNSALAAQLQTPIK	Eukaryota	Metazoa			Chordata	Craniata	Actinopterygii	Actinopteri	Neopterygii	Teleostei	Cypriniphysae	Cypriniformes				Cyprinoidea	Cyprinidae				Danio				Danio rerio
LQHPQAGEIENDVSR	Eukaryota	Metazoa			Chordata	Craniata	Actinopterygii	Actinopteri	Neopterygii	Teleostei	Cypriniphysae	Cypriniformes				Cyprinoidea	Cyprinidae				Danio				Danio rerio
LQLVDAGLVECLLEVVAQTVNSER	Eukaryota	Metazoa			Chordata	Craniata	Actinopterygii	Actinopteri	Neopterygii	Teleostei	Cypriniphysae	Cypriniformes				Cyprinoidea	Cyprinidae				Danio				Danio rerio
LSALHTSISQSLVSEDGER	Eukaryota	Metazoa			Chordata	Craniata	Actinopterygii	Actinopteri	Neopterygii	Teleostei	Cypriniphysae	Cypriniformes				Cyprinoidea	Cyprinidae				Danio				Danio rerio
ISELPPVSSEHVGGYR	Eukaryota	Metazoa			Chordata	Craniata	Actinopterygii	Actinopteri	Neopterygii	Teleostei	Cypriniphysae	Cypriniformes				Cyprinoidea	Cyprinidae				Danio				Danio rerio
ISHLEEDSSQMR	Eukaryota	Metazoa			Chordata	Craniata	Actinopterygii	Actinopteri	Neopterygii	Teleostei	Cypriniphysae	Cypriniformes				Cyprinoidea	Cyprinidae				Danio				Danio rerio
LTPNNWSVDQCIQTGVDNPGHPFIK	Eukaryota	Metazoa			Chordata	Craniata	Actinopterygii	Actinopteri	Neopterygii	Teleostei	Cypriniphysae	Cypriniformes				Cyprinoidea	Cyprinidae				Danio				Danio rerio
LVDHVYDDQVIDQLTVR	Eukaryota	Metazoa			Chordata	Craniata	Actinopterygii	Actinopteri	Neopterygii	Teleostei	Cypriniphysae	Cypriniformes				Cyprinoidea	Cyprinidae				Danio				Danio rerio
LVPEFAHDK	Eukaryota	Metazoa			Chordata	Craniata	Actinopterygii	Actinopteri	Neopterygii	Teleostei	Cypriniphysae	Cypriniformes				Cyprinoidea	Cyprinidae				Danio				Danio rerio
LVQPIALQLVLDR	Eukaryota	Metazoa			Chordata	Craniata	Actinopterygii	Actinopteri	Neopterygii	Teleostei	Cypriniphysae	Cypriniformes				Cyprinoidea	Cyprinidae				Danio				Danio rerio
LVTELDTYVVEIEK	Eukaryota	Metazoa			Chordata	Craniata	Actinopterygii	Actinopteri	Neopterygii	Teleostei	Cypriniphysae	Cypriniformes				Cyprinoidea	Cyprinidae				Danio				Danio rerio
LYNLDVFQYELHNPMALYGAVPVLISHSTER	Eukaryota	Metazoa			Chordata	Craniata	Actinopterygii	Actinopteri	Neopterygii	Teleostei	Cypriniphysae	Cypriniformes				Cyprinoidea	Cyprinidae				Danio				Danio rerio
LYTIENLMPGHEYIFR	Eukaryota	Metazoa			Chordata	Craniata	Actinopterygii	Actinopteri	Neopterygii	Teleostei	Cypriniphysae	Cypriniformes				Cyprinoidea	Cyprinidae				Danio				Danio rerio
IYTLNLLDFKPK	Eukaryota	Metazoa			Chordata	Craniata	Actinopterygii	Actinopteri	Neopterygii	Teleostei	Cypriniphysae	Cypriniformes				Cyprinoidea	Cyprinidae				Danio				Danio rerio
MEDTEPYSPELLSAMIR	Eukaryota	Metazoa			Chordata	Craniata	Actinopterygii	Actinopteri	Neopterygii	Teleostei	Cypriniphysae	Cypriniformes				Cyprinoidea	Cyprinidae				Danio				Danio rerio
NAFACFDEEGTGFIHEDYLR	Eukaryota	Metazoa			Chordata	Craniata	Actinopterygii	Actinopteri	Neopterygii	Teleostei	Cypriniphysae	Cypriniformes				Cyprinoidea	Cyprinidae				Danio				Danio rerio
NALLIVTMVSLAGR	Eukaryota	Metazoa			Chordata	Craniata	Actinopterygii	Actinopteri	Neopterygii	Teleostei	Cypriniphysae	Cypriniformes				Cyprinoidea	Cyprinidae				Danio				Danio rerio
NALVSNVNIELYNALHYHMVNK	Eukaryota	Metazoa			Chordata	Craniata	Actinopterygii	Actinopteri	Neopterygii	Teleostei	Cypriniphysae	Cypriniformes				Cyprinoidea	Cyprinidae				Danio				Danio rerio
NAVAHTFSLDNNLSCLINLIEFHAK	Eukaryota	Metazoa			Chordata	Craniata	Actinopterygii	Actinopteri	Neopterygii	Teleostei	Cypriniphysae	Cypriniformes				Cyprinoidea	Cyprinidae				Danio				Danio rerio
NDLIQALSQR	Eukaryota	Metazoa			Chordata	Craniata	Actinopterygii	Actinopteri	Neopterygii	Teleostei	Cypriniphysae	Cypriniformes				Cyprinoidea	Cyprinidae				Danio				Danio rerio
NDLQLAVASESGNLSDAEER	Eukaryota	Metazoa			Chordata	Craniata	Actinopterygii	Actinopteri	Neopterygii	Teleostei	Cypriniphysae	Cypriniformes				Cyprinoidea	Cyprinidae				Danio				Danio rerio
NIASVCLQIGYPTLASIPHTIINGYK	Eukaryota	Metazoa			Chordata	Craniata	Actinopterygii	Actinopteri	Neopterygii	Teleostei	Cypriniphysae	Cypriniformes				Cyprinoidea	Cyprinidae				Danio				Danio rerio
NLHDLEEATAMIR	Eukaryota	Metazoa			Chordata	Craniata	Actinopterygii	Actinopteri	Neopterygii	Teleostei	Cypriniphysae	Cypriniformes				Cyprinoidea	Cyprinidae				Danio				Danio rerio
NLHLDIEEISELVNGLHQTLNHQDLR	Eukaryota	Metazoa			Chordata	Craniata	Actinopterygii	Actinopteri	Neopterygii	Teleostei	Cypriniphysae	Cypriniformes				Cyprinoidea	Cyprinidae				Danio				Danio rerio
NLLDPSNDTLLLGHIIDTQQLEAVR	Eukaryota	Metazoa			Chordata	Craniata	Actinopterygii	Actinopteri	Neopterygii	Teleostei	Cypriniphysae	Cypriniformes				Cyprinoidea	Cyprinidae				Danio				Danio rerio
NNIQHAGVQYILDSVIDQLQK	Eukaryota	Metazoa			Chordata	Craniata	Actinopterygii	Actinopteri	Neopterygii	Teleostei	Cypriniphysae	Cypriniformes				Cyprinoidea	Cyprinidae				Danio				Danio rerio
NQLISLIHDYTISIDDLDAYAER	Eukaryota	Metazoa			Chordata	Craniata	Actinopterygii	Actinopteri	Neopterygii	Teleostei	Cypriniphysae	Cypriniformes				Cyprinoidea	Cyprinidae				Danio				Danio rerio
NSLVFDCHFPEDEVGHGDGEEESDIFTIR	Eukaryota	Metazoa			Chordata	Craniata	Actinopterygii	Actinopteri	Neopterygii	Teleostei	Cypriniphysae	Cypriniformes				Cyprinoidea	Cyprinidae				Danio				Danio rerio
NSVKPDPDWGPALQEHR	Eukaryota	Metazoa			Chordata	Craniata	Actinopterygii	Actinopteri	Neopterygii	Teleostei	Cypriniphysae	Cypriniformes				Cyprinoidea	Cyprinidae				Danio				Danio rerio
NVQSILTWHQAR	Eukaryota	Metazoa			Chordata	Craniata	Actinopterygii	Actinopteri	Neopterygii	Teleostei	Cypriniphysae	Cypriniformes				Cyprinoidea	Cyprinidae				Danio				Danio rerio
NVTIWGNHSSTQYPDVHHAIVTR	Eukaryota	Metazoa			Chordata	Craniata	Actinopterygii	Actinopteri	Neopterygii	Teleostei	Cypriniphysae	Cypriniformes				Cyprinoidea	Cyprinidae				Danio				Danio rerio
QATVAVCNPYLDPYCLYAIRPK	Eukaryota	Metazoa			Chordata	Craniata	Actinopterygii	Actinopteri	Neopterygii	Teleostei	Cypriniphysae	Cypriniformes				Cyprinoidea	Cyprinidae				Danio				Danio rerio
QDLASLPTELIAQIGNR	Eukaryota	Metazoa			Chordata	Craniata	Actinopterygii	Actinopteri	Neopterygii	Teleostei	Cypriniphysae	Cypriniformes				Cyprinoidea	Cyprinidae				Danio				Danio rerio
QFVANFDQEK	Eukaryota	Metazoa			Chordata	Craniata	Actinopterygii	Actinopteri	Neopterygii	Teleostei	Cypriniphysae	Cypriniformes				Cyprinoidea	Cyprinidae				Danio				Danio rerio
QGPHFVEYLSFEVTPECDVHLK	Eukaryota	Metazoa			Chordata	Craniata	Actinopterygii	Actinopteri	Neopterygii	Teleostei	Cypriniphysae	Cypriniformes				Cyprinoidea	Cyprinidae				Danio				Danio rerio
QHFPATQLLDYALEVEK	Eukaryota	Metazoa			Chordata	Craniata	Actinopterygii	Actinopteri	Neopterygii	Teleostei	Cypriniphysae	Cypriniformes				Cyprinoidea	Cyprinidae				Danio				Danio rerio
QLAFLEEAEGGFDHFTR	Eukaryota	Metazoa			Chordata	Craniata	Actinopterygii	Actinopteri	Neopterygii	Teleostei	Cypriniphysae	Cypriniformes				Cyprinoidea	Cyprinidae				Danio				Danio rerio
QLESAVLHCLCLLELALQK	Eukaryota	Metazoa			Chordata	Craniata	Actinopterygii	Actinopteri	Neopterygii	Teleostei	Cypriniphysae	Cypriniformes				Cyprinoidea	Cyprinidae				Danio				Danio rerio
QILANPFQDYVNTHPVSHAHR	Eukaryota	Metazoa			Chordata	Craniata	Actinopterygii	Actinopteri	Neopterygii	Teleostei	Cypriniphysae	Cypriniformes				Cyprinoidea	Cyprinidae				Danio				Danio rerio
QISSLQSAYDNLCASSGTTAVPHFLLK	Eukaryota	Metazoa			Chordata	Craniata	Actinopterygii	Actinopteri	Neopterygii	Teleostei	Cypriniphysae	Cypriniformes				Cyprinoidea	Cyprinidae				Danio				Danio rerio
QMFEADADR	Eukaryota	Metazoa			Chordata	Craniata	Actinopterygii	Actinopteri	Neopterygii	Teleostei	Cypriniphysae	Cypriniformes				Cyprinoidea	Cyprinidae				Danio				Danio rerio
QSGDHAAAETECADNPTVFPHECTR	Eukaryota	Metazoa			Chordata	Craniata	Actinopterygii	Actinopteri	Neopterygii	Teleostei	Cypriniphysae	Cypriniformes				Cyprinoidea	Cyprinidae				Danio				Danio rerio
QVGNVTKPTIVISHEGDK	Eukaryota	Metazoa			Chordata	Craniata	Actinopterygii	Actinopteri	Neopterygii	Teleostei	Cypriniphysae	Cypriniformes				Cyprinoidea	Cyprinidae				Danio				Danio rerio
QVVTFTQLLEDQSAK	Eukaryota	Metazoa			Chordata	Craniata	Actinopterygii	Actinopteri	Neopterygii	Teleostei	Cypriniphysae	Cypriniformes				Cyprinoidea	Cyprinidae				Danio				Danio rerio
QWIEGDLLHLEIHCQDK	Eukaryota	Metazoa			Chordata	Craniata	Actinopterygii	Actinopteri	Neopterygii	Teleostei	Cypriniphysae	Cypriniformes				Cyprinoidea	Cyprinidae				Danio				Danio rerio
QYTAGGEPPCYFIHVVK	Eukaryota	Metazoa			Chordata	Craniata	Actinopterygii	Actinopteri	Neopterygii	Teleostei	Cypriniphysae	Cypriniformes				Cyprinoidea	Cyprinidae				Danio				Danio rerio
SAHGWQTHPPTTPALTEDSHSPSR	Eukaryota	Metazoa			Chordata	Craniata	Actinopterygii	Actinopteri	Neopterygii	Teleostei	Cypriniphysae	Cypriniformes				Cyprinoidea	Cyprinidae				Danio				Danio rerio
SCAALLGLVLESAFK	Eukaryota	Metazoa			Chordata	Craniata	Actinopterygii	Actinopteri	Neopterygii	Teleostei	Cypriniphysae	Cypriniformes				Cyprinoidea	Cyprinidae				Danio				Danio rerio
SCAHITNIPYNVTK	Eukaryota	Metazoa			Chordata	Craniata	Actinopterygii	Actinopteri	Neopterygii	Teleostei	Cypriniphysae	Cypriniformes				Cyprinoidea	Cyprinidae				Danio				Danio rerio
SDASANLDEHTASHMCSLSLTR	Eukaryota	Metazoa			Chordata	Craniata	Actinopterygii	Actinopteri	Neopterygii	Teleostei	Cypriniphysae	Cypriniformes				Cyprinoidea	Cyprinidae				Danio				Danio rerio
SDELNCFKPDDDCAHR	Eukaryota	Metazoa			Chordata	Craniata	Actinopterygii	Actinopteri	Neopterygii	Teleostei	Cypriniphysae	Cypriniformes				Cyprinoidea	Cyprinidae				Danio				Danio rerio
SDSEIAHIALETLEGHQR	Eukaryota	Metazoa			Chordata	Craniata	Actinopterygii	Actinopteri	Neopterygii	Teleostei	Cypriniphysae	Cypriniformes				Cyprinoidea	Cyprinidae				Danio				Danio rerio
SEPKPLAAPVIANDLTIEPSLK	Eukaryota	Metazoa			Chordata	Craniata	Actinopterygii	Actinopteri	Neopterygii	Teleostei	Cypriniphysae	Cypriniformes				Cyprinoidea	Cyprinidae				Danio				Danio rerio
SEVSGQLETTLLALCQATRPEGYNIDDALAHTDAK	Eukaryota	Metazoa			Chordata	Craniata	Actinopterygii	Actinopteri	Neopterygii	Teleostei	Cypriniphysae	Cypriniformes				Cyprinoidea	Cyprinidae				Danio				Danio rerio
SFLTLVECLENK	Eukaryota	Metazoa			Chordata	Craniata	Actinopterygii	Actinopteri	Neopterygii	Teleostei	Cypriniphysae	Cypriniformes				Cyprinoidea	Cyprinidae				Danio				Danio rerio
SHGLDCHDNANVAVIDGDK	Eukaryota	Metazoa			Chordata	Craniata	Actinopterygii	Actinopteri	Neopterygii	Teleostei	Cypriniphysae	Cypriniformes				Cyprinoidea	Cyprinidae				Danio				Danio rerio
SIFLLWEPPR	Eukaryota	Metazoa			Chordata	Craniata	Actinopterygii	Actinopteri	Neopterygii	Teleostei	Cypriniphysae	Cypriniformes				Cyprinoidea	Cyprinidae				Danio				Danio rerio
SIFVPNIGWASQLTTGEVWVQFNDGSQLMVQVGVSCITFTSPEGHITR	Eukaryota	Metazoa			Chordata	Craniata	Actinopterygii	Actinopteri	Neopterygii	Teleostei	Cypriniphysae	Cypriniformes				Cyprinoidea	Cyprinidae				Danio				Danio rerio
SLIETANYNYIIKPSDSGALIAEATVK	Eukaryota	Metazoa			Chordata	Craniata	Actinopterygii	Actinopteri	Neopterygii	Teleostei	Cypriniphysae	Cypriniformes				Cyprinoidea	Cyprinidae				Danio				Danio rerio
SLLHGEYVNLHNSPTSLAFLR	Eukaryota	Metazoa			Chordata	Craniata	Actinopterygii	Actinopteri	Neopterygii	Teleostei	Cypriniphysae	Cypriniformes				Cyprinoidea	Cyprinidae				Danio				Danio rerio
SIMGHISLDLVTFLDPNNLEQQVWAIDLDLGYSNQLAMTQLMLMMTR	Eukaryota	Metazoa			Chordata	Craniata	Actinopterygii	Actinopteri	Neopterygii	Teleostei	Cypriniphysae	Cypriniformes				Cyprinoidea	Cyprinidae				Danio				Danio rerio
SIQDDPLLVHYMHVAK	Eukaryota	Metazoa			Chordata	Craniata	Actinopterygii	Actinopteri	Neopterygii	Teleostei	Cypriniphysae	Cypriniformes				Cyprinoidea	Cyprinidae				Danio				Danio rerio
SLTDAHQLNYDPHNPFDICAASYTPLYR	Eukaryota	Metazoa			Chordata	Craniata	Actinopterygii	Actinopteri	Neopterygii	Teleostei	Cypriniphysae	Cypriniformes				Cyprinoidea	Cyprinidae				Danio				Danio rerio
SLVSEPSFDAEFQHFLR	Eukaryota	Metazoa			Chordata	Craniata	Actinopterygii	Actinopteri	Neopterygii	Teleostei	Cypriniphysae	Cypriniformes				Cyprinoidea	Cyprinidae				Danio				Danio rerio
SSCGSAAVPPELALVFGDTHTHTLSLLFSR	Eukaryota	Metazoa			Chordata	Craniata	Actinopterygii	Actinopteri	Neopterygii	Teleostei	Cypriniphysae	Cypriniformes				Cyprinoidea	Cyprinidae				Danio				Danio rerio
SSHAQSVGLIALMESINK	Eukaryota	Metazoa			Chordata	Craniata	Actinopterygii	Actinopteri	Neopterygii	Teleostei	Cypriniphysae	Cypriniformes				Cyprinoidea	Cyprinidae				Danio				Danio rerio
SSVIVSEHVVAQYPFEIPHPPGIPAVQSATK	Eukaryota	Metazoa			Chordata	Craniata	Actinopterygii	Actinopteri	Neopterygii	Teleostei	Cypriniphysae	Cypriniformes				Cyprinoidea	Cyprinidae				Danio				Danio rerio
SSVQSLEIELQSLLAMK	Eukaryota	Metazoa			Chordata	Craniata	Actinopterygii	Actinopteri	Neopterygii	Teleostei	Cypriniphysae	Cypriniformes				Cyprinoidea	Cyprinidae				Danio				Danio rerio
STAFQDNLIHVAELAYK	Eukaryota	Metazoa			Chordata	Craniata	Actinopterygii	Actinopteri	Neopterygii	Teleostei	Cypriniphysae	Cypriniformes				Cyprinoidea	Cyprinidae				Danio				Danio rerio
SWLNAGEQEHILYLCYEDMISDLK	Eukaryota	Metazoa			Chordata	Craniata	Actinopterygii	Actinopteri	Neopterygii	Teleostei	Cypriniphysae	Cypriniformes				Cyprinoidea	Cyprinidae				Danio				Danio rerio
TAAHGISLFLVDR	Eukaryota	Metazoa			Chordata	Craniata	Actinopterygii	Actinopteri	Neopterygii	Teleostei	Cypriniphysae	Cypriniformes				Cyprinoidea	Cyprinidae				Danio				Danio rerio
TCEDYQLCIIAVLPHILDTGASGR	Eukaryota	Metazoa			Chordata	Craniata	Actinopterygii	Actinopteri	Neopterygii	Teleostei	Cypriniphysae	Cypriniformes				Cyprinoidea	Cyprinidae				Danio				Danio rerio
TDIQIAVPHGYYGR	Eukaryota	Metazoa			Chordata	Craniata	Actinopterygii	Actinopteri	Neopterygii	Teleostei	Cypriniphysae	Cypriniformes				Cyprinoidea	Cyprinidae				Danio				Danio rerio
TEDLGILYSNR	Eukaryota	Metazoa			Chordata	Craniata	Actinopterygii	Actinopteri	Neopterygii	Teleostei	Cypriniphysae	Cypriniformes				Cyprinoidea	Cyprinidae				Danio				Danio rerio
TGDVASEIATLQETVNILGR	Eukaryota	Metazoa			Chordata	Craniata	Actinopterygii	Actinopteri	Neopterygii	Teleostei	Cypriniphysae	Cypriniformes				Cyprinoidea	Cyprinidae				Danio				Danio rerio
TGGSDITGFLVEYQEEGEK	Eukaryota	Metazoa			Chordata	Craniata	Actinopterygii	Actinopteri	Neopterygii	Teleostei	Cypriniphysae	Cypriniformes				Cyprinoidea	Cyprinidae				Danio				Danio rerio
TGIFANDVK	Eukaryota	Metazoa			Chordata	Craniata	Actinopterygii	Actinopteri	Neopterygii	Teleostei	Cypriniphysae	Cypriniformes				Cyprinoidea	Cyprinidae				Danio				Danio rerio
THIEMSVNATFSTMR	Eukaryota	Metazoa			Chordata	Craniata	Actinopterygii	Actinopteri	Neopterygii	Teleostei	Cypriniphysae	Cypriniformes				Cyprinoidea	Cyprinidae				Danio				Danio rerio
THLHQWTCHPEQNDAIR	Eukaryota	Metazoa			Chordata	Craniata	Actinopterygii	Actinopteri	Neopterygii	Teleostei	Cypriniphysae	Cypriniformes				Cyprinoidea	Cyprinidae				Danio				Danio rerio
THPVCNLITSLPLWCPDPLSPGTGR	Eukaryota	Metazoa			Chordata	Craniata	Actinopterygii	Actinopteri	Neopterygii	Teleostei	Cypriniphysae	Cypriniformes				Cyprinoidea	Cyprinidae				Danio				Danio rerio
TLGYQPGVFEVFDVFSEQR	Eukaryota	Metazoa			Chordata	Craniata	Actinopterygii	Actinopteri	Neopterygii	Teleostei	Cypriniphysae	Cypriniformes				Cyprinoidea	Cyprinidae				Danio				Danio rerio
TIIEEAIPMVSGPKPR	Eukaryota	Metazoa			Chordata	Craniata	Actinopterygii	Actinopteri	Neopterygii	Teleostei	Cypriniphysae	Cypriniformes				Cyprinoidea	Cyprinidae				Danio				Danio rerio
TLLNLTDAGYQAVLNEVFR	Eukaryota	Metazoa			Chordata	Craniata	Actinopterygii	Actinopteri	Neopterygii	Teleostei	Cypriniphysae	Cypriniformes				Cyprinoidea	Cyprinidae				Danio				Danio rerio
TLQSLQIELQSQLSMK	Eukaryota	Metazoa			Chordata	Craniata	Actinopterygii	Actinopteri	Neopterygii	Teleostei	Cypriniphysae	Cypriniformes				Cyprinoidea	Cyprinidae				Danio				Danio rerio
TMLEPYVQEYK	Eukaryota	Metazoa			Chordata	Craniata	Actinopterygii	Actinopteri	Neopterygii	Teleostei	Cypriniphysae	Cypriniformes				Cyprinoidea	Cyprinidae				Danio				Danio rerio
TNIPDVFAAGDVVSFPLTLVGHK	Eukaryota	Metazoa			Chordata	Craniata	Actinopterygii	Actinopteri	Neopterygii	Teleostei	Cypriniphysae	Cypriniformes				Cyprinoidea	Cyprinidae				Danio				Danio rerio
TPIGAFNGTLSSVPLHELGTLVIK	Eukaryota	Metazoa			Chordata	Craniata	Actinopterygii	Actinopteri	Neopterygii	Teleostei	Cypriniphysae	Cypriniformes				Cyprinoidea	Cyprinidae				Danio				Danio rerio
TQFSRPGAPDAPEVTK	Eukaryota	Metazoa			Chordata	Craniata	Actinopterygii	Actinopteri	Neopterygii	Teleostei	Cypriniphysae	Cypriniformes				Cyprinoidea	Cyprinidae				Danio				Danio rerio
TSAFLNVEPPFVEFSKPLHDVEVK	Eukaryota	Metazoa			Chordata	Craniata	Actinopterygii	Actinopteri	Neopterygii	Teleostei	Cypriniphysae	Cypriniformes				Cyprinoidea	Cyprinidae				Danio				Danio rerio
TSITLGWVKPVYDGGSEITSYVIEQR	Eukaryota	Metazoa			Chordata	Craniata	Actinopterygii	Actinopteri	Neopterygii	Teleostei	Cypriniphysae	Cypriniformes				Cyprinoidea	Cyprinidae				Danio				Danio rerio
TSRPDTAVIYNPEEK	Eukaryota	Metazoa			Chordata	Craniata	Actinopterygii	Actinopteri	Neopterygii	Teleostei	Cypriniphysae	Cypriniformes				Cyprinoidea	Cyprinidae				Danio				Danio rerio
TTTQHQTEIAQDIFWR	Eukaryota	Metazoa			Chordata	Craniata	Actinopterygii	Actinopteri	Neopterygii	Teleostei	Cypriniphysae	Cypriniformes				Cyprinoidea	Cyprinidae				Danio				Danio rerio
TVLSAASVK	Eukaryota	Metazoa			Chordata	Craniata	Actinopterygii	Actinopteri	Neopterygii	Teleostei	Cypriniphysae	Cypriniformes				Cyprinoidea	Cyprinidae				Danio				Danio rerio
TVPAAVPGICFLSGGQSEEEASLNLNAMNQLSLHRPWK	Eukaryota	Metazoa			Chordata	Craniata	Actinopterygii	Actinopteri	Neopterygii	Teleostei	Cypriniphysae	Cypriniformes				Cyprinoidea	Cyprinidae				Danio				Danio rerio
TVVAVPDVTEAASGADFLIFVIPHQFIVR	Eukaryota	Metazoa			Chordata	Craniata	Actinopterygii	Actinopteri	Neopterygii	Teleostei	Cypriniphysae	Cypriniformes				Cyprinoidea	Cyprinidae				Danio				Danio rerio
VAFTGSTDVGHLIQR	Eukaryota	Metazoa			Chordata	Craniata	Actinopterygii	Actinopteri	Neopterygii	Teleostei	Cypriniphysae	Cypriniformes				Cyprinoidea	Cyprinidae				Danio				Danio rerio
VAVPSTIHCDHLIEAQTGGAQDLQK	Eukaryota	Metazoa			Chordata	Craniata	Actinopterygii	Actinopteri	Neopterygii	Teleostei	Cypriniphysae	Cypriniformes				Cyprinoidea	Cyprinidae				Danio				Danio rerio
VEEIILEAIESCK	Eukaryota	Metazoa			Chordata	Craniata	Actinopterygii	Actinopteri	Neopterygii	Teleostei	Cypriniphysae	Cypriniformes				Cyprinoidea	Cyprinidae				Danio				Danio rerio
VEIQDKPLLPEGPVVVDALLK	Eukaryota	Metazoa			Chordata	Craniata	Actinopterygii	Actinopteri	Neopterygii	Teleostei	Cypriniphysae	Cypriniformes				Cyprinoidea	Cyprinidae				Danio				Danio rerio
VENAHGFATASCDVNVLDKPGPPVNFGFDEIR	Eukaryota	Metazoa			Chordata	Craniata	Actinopterygii	Actinopteri	Neopterygii	Teleostei	Cypriniphysae	Cypriniformes				Cyprinoidea	Cyprinidae				Danio				Danio rerio
VESSYNVHSLEINR	Eukaryota	Metazoa			Chordata	Craniata	Actinopterygii	Actinopteri	Neopterygii	Teleostei	Cypriniphysae	Cypriniformes				Cyprinoidea	Cyprinidae				Danio				Danio rerio
VETLPVELPEHIASASFETLAVVR	Eukaryota	Metazoa			Chordata	Craniata	Actinopterygii	Actinopteri	Neopterygii	Teleostei	Cypriniphysae	Cypriniformes				Cyprinoidea	Cyprinidae				Danio				Danio rerio
VFYQGLLLLDK	Eukaryota	Metazoa			Chordata	Craniata	Actinopterygii	Actinopteri	Neopterygii	Teleostei	Cypriniphysae	Cypriniformes				Cyprinoidea	Cyprinidae				Danio				Danio rerio
VHHELNQFCSVHTLQDVYIGLFDQIDENLK	Eukaryota	Metazoa			Chordata	Craniata	Actinopterygii	Actinopteri	Neopterygii	Teleostei	Cypriniphysae	Cypriniformes				Cyprinoidea	Cyprinidae				Danio				Danio rerio
VHIMPDNPEILLAK	Eukaryota	Metazoa			Chordata	Craniata	Actinopterygii	Actinopteri	Neopterygii	Teleostei	Cypriniphysae	Cypriniformes				Cyprinoidea	Cyprinidae				Danio				Danio rerio
VLLSAATENTFLLK	Eukaryota	Metazoa			Chordata	Craniata	Actinopterygii	Actinopteri	Neopterygii	Teleostei	Cypriniphysae	Cypriniformes				Cyprinoidea	Cyprinidae				Danio				Danio rerio
VLNHLHTQLQNVGFQIETIGK	Eukaryota	Metazoa			Chordata	Craniata	Actinopterygii	Actinopteri	Neopterygii	Teleostei	Cypriniphysae	Cypriniformes				Cyprinoidea	Cyprinidae				Danio				Danio rerio
VLQQLTHLQEDEPQLEVLYDK	Eukaryota	Metazoa			Chordata	Craniata	Actinopterygii	Actinopteri	Neopterygii	Teleostei	Cypriniphysae	Cypriniformes				Cyprinoidea	Cyprinidae				Danio				Danio rerio
VISGVQDLEYTVTDVIEGK	Eukaryota	Metazoa			Chordata	Craniata	Actinopterygii	Actinopteri	Neopterygii	Teleostei	Cypriniphysae	Cypriniformes				Cyprinoidea	Cyprinidae				Danio				Danio rerio
VMGNAGHPSSLKPIMK	Eukaryota	Metazoa			Chordata	Craniata	Actinopterygii	Actinopteri	Neopterygii	Teleostei	Cypriniphysae	Cypriniformes				Cyprinoidea	Cyprinidae				Danio				Danio rerio
VNVSNIANIIQELLQENIVR	Eukaryota	Metazoa			Chordata	Craniata	Actinopterygii	Actinopteri	Neopterygii	Teleostei	Cypriniphysae	Cypriniformes				Cyprinoidea	Cyprinidae				Danio				Danio rerio
VNYSQKPDGPAPIIDVVR	Eukaryota	Metazoa			Chordata	Craniata	Actinopterygii	Actinopteri	Neopterygii	Teleostei	Cypriniphysae	Cypriniformes				Cyprinoidea	Cyprinidae				Danio				Danio rerio
VPILGSLLNLPGISGLVDK	Eukaryota	Metazoa			Chordata	Craniata	Actinopterygii	Actinopteri	Neopterygii	Teleostei	Cypriniphysae	Cypriniformes				Cyprinoidea	Cyprinidae				Danio				Danio rerio
VPQEDGGDPITHYIVER	Eukaryota	Metazoa			Chordata	Craniata	Actinopterygii	Actinopteri	Neopterygii	Teleostei	Cypriniphysae	Cypriniformes				Cyprinoidea	Cyprinidae				Danio				Danio rerio
VQQLLHICSEHFDNK	Eukaryota	Metazoa			Chordata	Craniata	Actinopterygii	Actinopteri	Neopterygii	Teleostei	Cypriniphysae	Cypriniformes				Cyprinoidea	Cyprinidae				Danio				Danio rerio
VSAILSSQKPVVVR	Eukaryota	Metazoa			Chordata	Craniata	Actinopterygii	Actinopteri	Neopterygii	Teleostei	Cypriniphysae	Cypriniformes				Cyprinoidea	Cyprinidae				Danio				Danio rerio
VSPFEGEQYHIAPK	Eukaryota	Metazoa			Chordata	Craniata	Actinopterygii	Actinopteri	Neopterygii	Teleostei	Cypriniphysae	Cypriniformes				Cyprinoidea	Cyprinidae				Danio				Danio rerio
VTAPDVIFPLMQSTEDAGGVQSFSVCELLK	Eukaryota	Metazoa			Chordata	Craniata	Actinopterygii	Actinopteri	Neopterygii	Teleostei	Cypriniphysae	Cypriniformes				Cyprinoidea	Cyprinidae				Danio				Danio rerio
VTSSIHLIDPNTLQIAEVDGSTFWR	Eukaryota	Metazoa			Chordata	Craniata	Actinopterygii	Actinopteri	Neopterygii	Teleostei	Cypriniphysae	Cypriniformes				Cyprinoidea	Cyprinidae				Danio				Danio rerio
VVTNYYSAHDTNSNLLIER	Eukaryota	Metazoa			Chordata	Craniata	Actinopterygii	Actinopteri	Neopterygii	Teleostei	Cypriniphysae	Cypriniformes				Cyprinoidea	Cyprinidae				Danio				Danio rerio
WDGGTPIK	Eukaryota	Metazoa			Chordata	Craniata	Actinopterygii	Actinopteri	Neopterygii	Teleostei	Cypriniphysae	Cypriniformes				Cyprinoidea	Cyprinidae				Danio				Danio rerio
WEDLQNYLHSVNAER	Eukaryota	Metazoa			Chordata	Craniata	Actinopterygii	Actinopteri	Neopterygii	Teleostei	Cypriniphysae	Cypriniformes				Cyprinoidea	Cyprinidae				Danio				Danio rerio
WEEAVDQFWNHVSELTTR	Eukaryota	Metazoa			Chordata	Craniata	Actinopterygii	Actinopteri	Neopterygii	Teleostei	Cypriniphysae	Cypriniformes				Cyprinoidea	Cyprinidae				Danio				Danio rerio
WLGLLGEEPVPHAETILAAVAK	Eukaryota	Metazoa			Chordata	Craniata	Actinopterygii	Actinopteri	Neopterygii	Teleostei	Cypriniphysae	Cypriniformes				Cyprinoidea	Cyprinidae				Danio				Danio rerio
WLLDTLPAVATPVVLK	Eukaryota	Metazoa			Chordata	Craniata	Actinopterygii	Actinopteri	Neopterygii	Teleostei	Cypriniphysae	Cypriniformes				Cyprinoidea	Cyprinidae				Danio				Danio rerio
WVESQFNLLETLAQIR	Eukaryota	Metazoa			Chordata	Craniata	Actinopterygii	Actinopteri	Neopterygii	Teleostei	Cypriniphysae	Cypriniformes				Cyprinoidea	Cyprinidae				Danio				Danio rerio
YCVAVPTCPAELLRPIHEIATEAISK	Eukaryota	Metazoa			Chordata	Craniata	Actinopterygii	Actinopteri	Neopterygii	Teleostei	Cypriniphysae	Cypriniformes				Cyprinoidea	Cyprinidae				Danio				Danio rerio
YDAEEIEAEVSSDVTTEIHNIITTDAIK	Eukaryota	Metazoa			Chordata	Craniata	Actinopterygii	Actinopteri	Neopterygii	Teleostei	Cypriniphysae	Cypriniformes				Cyprinoidea	Cyprinidae				Danio				Danio rerio
YDTTHFLVNTGSLLSVLLPK	Eukaryota	Metazoa			Chordata	Craniata	Actinopterygii	Actinopteri	Neopterygii	Teleostei	Cypriniphysae	Cypriniformes				Cyprinoidea	Cyprinidae				Danio				Danio rerio
YEALLLSGIVQEGLAK	Eukaryota	Metazoa			Chordata	Craniata	Actinopterygii	Actinopteri	Neopterygii	Teleostei	Cypriniphysae	Cypriniformes				Cyprinoidea	Cyprinidae				Danio				Danio rerio
YEAMGIWYEHR	Eukaryota	Metazoa			Chordata	Craniata	Actinopterygii	Actinopteri	Neopterygii	Teleostei	Cypriniphysae	Cypriniformes				Cyprinoidea	Cyprinidae				Danio				Danio rerio
YFGGFGNLYNTEAIMANPK	Eukaryota	Metazoa			Chordata	Craniata	Actinopterygii	Actinopteri	Neopterygii	Teleostei	Cypriniphysae	Cypriniformes				Cyprinoidea	Cyprinidae				Danio				Danio rerio
YGYLESFNLVDGR	Eukaryota	Metazoa			Chordata	Craniata	Actinopterygii	Actinopteri	Neopterygii	Teleostei	Cypriniphysae	Cypriniformes				Cyprinoidea	Cyprinidae				Danio				Danio rerio
YHSPVDMLSVVHAK	Eukaryota	Metazoa			Chordata	Craniata	Actinopterygii	Actinopteri	Neopterygii	Teleostei	Cypriniphysae	Cypriniformes				Cyprinoidea	Cyprinidae				Danio				Danio rerio
YLEQHFPQLNVENRPDILK	Eukaryota	Metazoa			Chordata	Craniata	Actinopterygii	Actinopteri	Neopterygii	Teleostei	Cypriniphysae	Cypriniformes				Cyprinoidea	Cyprinidae				Danio				Danio rerio
YLGLPSEGPFKPDHYR	Eukaryota	Metazoa			Chordata	Craniata	Actinopterygii	Actinopteri	Neopterygii	Teleostei	Cypriniphysae	Cypriniformes				Cyprinoidea	Cyprinidae				Danio				Danio rerio
YLSPFHDIPMFADEAQNIFHMVVEVPR	Eukaryota	Metazoa			Chordata	Craniata	Actinopterygii	Actinopteri	Neopterygii	Teleostei	Cypriniphysae	Cypriniformes				Cyprinoidea	Cyprinidae				Danio				Danio rerio
YPALTKPENQDINWGLLEGETR	Eukaryota	Metazoa			Chordata	Craniata	Actinopterygii	Actinopteri	Neopterygii	Teleostei	Cypriniphysae	Cypriniformes				Cyprinoidea	Cyprinidae				Danio				Danio rerio
YTNMLNGYQFQVSSLEEQLIQLR	Eukaryota	Metazoa			Chordata	Craniata	Actinopterygii	Actinopteri	Neopterygii	Teleostei	Cypriniphysae	Cypriniformes				Cyprinoidea	Cyprinidae				Danio				Danio rerio
YVFTDINFNIPHR	Eukaryota	Metazoa			Chordata	Craniata	Actinopterygii	Actinopteri	Neopterygii	Teleostei	Cypriniphysae	Cypriniformes				Cyprinoidea	Cyprinidae				Danio				Danio rerio
YWESSETVSQLETVR	Eukaryota	Metazoa			Chordata	Craniata	Actinopterygii	Actinopteri	Neopterygii	Teleostei	Cypriniphysae	Cypriniformes				Cyprinoidea	Cyprinidae				Danio				Danio rerio
AALAGGTTIIVDHVVPEPGTSLISAFNQWR	Eukaryota	Metazoa			Chordata	Craniata	Actinopterygii	Actinopteri	Neopterygii	Teleostei	Cypriniphysae	Cypriniformes				Cyprinoidea	Cyprinidae				Danio				Danio rerio
AALAGGTTMIVDHVVPEPGTSLISAFNQWR	Eukaryota	Metazoa			Chordata	Craniata	Actinopterygii	Actinopteri	Neopterygii	Teleostei	Cypriniphysae	Cypriniformes				Cyprinoidea	Cyprinidae				Danio				Danio rerio
AALNPPALAVLSHTPSGATQTIAWVGK	Eukaryota	Metazoa			Chordata	Craniata	Actinopterygii	Actinopteri	Neopterygii	Teleostei	Cypriniphysae	Cypriniformes				Cyprinoidea	Cyprinidae				Danio				Danio rerio
AAQIELLHALAGIAAENNLGEGILVK	Eukaryota	Metazoa			Chordata	Craniata	Actinopterygii	Actinopteri	Neopterygii	Teleostei	Cypriniphysae	Cypriniformes				Cyprinoidea	Cyprinidae				Danio				Danio rerio
AAVAWEAGKPLTIEEVEVAPPK	Eukaryota	Metazoa			Chordata	Craniata	Actinopterygii	Actinopteri	Neopterygii	Teleostei	Cypriniphysae	Cypriniformes				Cyprinoidea	Cyprinidae				Danio				Danio rerio
ADIPEYCVGGLHR	Eukaryota	Metazoa			Chordata	Craniata	Actinopterygii	Actinopteri	Neopterygii	Teleostei	Cypriniphysae	Cypriniformes				Cyprinoidea	Cyprinidae				Danio				Danio rerio
ADVHIFNALLAAVPAVRPK	Eukaryota	Metazoa			Chordata	Craniata	Actinopterygii	Actinopteri	Neopterygii	Teleostei	Cypriniphysae	Cypriniformes				Cyprinoidea	Cyprinidae				Danio				Danio rerio
AEYTSCHLEVPSCLHADAGQYK	Eukaryota	Metazoa			Chordata	Craniata	Actinopterygii	Actinopteri	Neopterygii	Teleostei	Cypriniphysae	Cypriniformes				Cyprinoidea	Cyprinidae				Danio				Danio rerio
AGEDAVLQSVFTHAGGQYTFLK	Eukaryota	Metazoa			Chordata	Craniata	Actinopterygii	Actinopteri	Neopterygii	Teleostei	Cypriniphysae	Cypriniformes				Cyprinoidea	Cyprinidae				Danio				Danio rerio
AGLGSGLTLQGTVHPELNHSGELTVK	Eukaryota	Metazoa			Chordata	Craniata	Actinopterygii	Actinopteri	Neopterygii	Teleostei	Cypriniphysae	Cypriniformes				Cyprinoidea	Cyprinidae				Danio				Danio rerio
AHIVFNFHQAVDGIQEQLR	Eukaryota	Metazoa			Chordata	Craniata	Actinopterygii	Actinopteri	Neopterygii	Teleostei	Cypriniphysae	Cypriniformes				Cyprinoidea	Cyprinidae				Danio				Danio rerio
AHNQDLGLPGSCLPHFSTIPFLYCTANEICYYASR	Eukaryota	Metazoa			Chordata	Craniata	Actinopterygii	Actinopteri	Neopterygii	Teleostei	Cypriniphysae	Cypriniformes				Cyprinoidea	Cyprinidae				Danio				Danio rerio
AHPNVLVEFYAPWCGHCK	Eukaryota	Metazoa			Chordata	Craniata	Actinopterygii	Actinopteri	Neopterygii	Teleostei	Cypriniphysae	Cypriniformes				Cyprinoidea	Cyprinidae				Danio				Danio rerio
ALDLDALDNSHPIEVDVGHPSEVDEIFDAISYSK	Eukaryota	Metazoa			Chordata	Craniata	Actinopterygii	Actinopteri	Neopterygii	Teleostei	Cypriniphysae	Cypriniformes				Cyprinoidea	Cyprinidae				Danio				Danio rerio
ALFPHVLCHNCTVEFNFGQNETPFFPK	Eukaryota	Metazoa			Chordata	Craniata	Actinopterygii	Actinopteri	Neopterygii	Teleostei	Cypriniphysae	Cypriniformes				Cyprinoidea	Cyprinidae				Danio				Danio rerio
ALVWESLAFK	Eukaryota	Metazoa			Chordata	Craniata	Actinopterygii	Actinopteri	Neopterygii	Teleostei	Cypriniphysae	Cypriniformes				Cyprinoidea	Cyprinidae				Danio				Danio rerio
APHSVQDIVLNLFVQK	Eukaryota	Metazoa			Chordata	Craniata	Actinopterygii	Actinopteri	Neopterygii	Teleostei	Cypriniphysae	Cypriniformes				Cyprinoidea	Cyprinidae				Danio				Danio rerio
ASASLHLGR	Eukaryota	Metazoa			Chordata	Craniata	Actinopterygii	Actinopteri	Neopterygii	Teleostei	Cypriniphysae	Cypriniformes				Cyprinoidea	Cyprinidae				Danio				Danio rerio
ATGKPVAATLCIGPDGDMHGVTPGECAVR	Eukaryota	Metazoa			Chordata	Craniata	Actinopterygii	Actinopteri	Neopterygii	Teleostei	Cypriniphysae	Cypriniformes				Cyprinoidea	Cyprinidae				Danio				Danio rerio
AVSHLNNTMLFGQK	Eukaryota	Metazoa			Chordata	Craniata	Actinopterygii	Actinopteri	Neopterygii	Teleostei	Cypriniphysae	Cypriniformes				Cyprinoidea	Cyprinidae				Danio				Danio rerio
CASHGWTLNPECDVVTCELTSNYEVK	Eukaryota	Metazoa			Chordata	Craniata	Actinopterygii	Actinopteri	Neopterygii	Teleostei	Cypriniphysae	Cypriniformes				Cyprinoidea	Cyprinidae				Danio				Danio rerio
CVCYEGYTGHDCSQLTCPNDCK	Eukaryota	Metazoa			Chordata	Craniata	Actinopterygii	Actinopteri	Neopterygii	Teleostei	Cypriniphysae	Cypriniformes				Cyprinoidea	Cyprinidae				Danio				Danio rerio
DADADVAGAPGAPLDVHCLDANK	Eukaryota	Metazoa			Chordata	Craniata	Actinopterygii	Actinopteri	Neopterygii	Teleostei	Cypriniphysae	Cypriniformes				Cyprinoidea	Cyprinidae				Danio				Danio rerio
DAGHPHYPFNDSY	Eukaryota	Metazoa			Chordata	Craniata	Actinopterygii	Actinopteri	Neopterygii	Teleostei	Cypriniphysae	Cypriniformes				Cyprinoidea	Cyprinidae				Danio				Danio rerio
DAQHYYNSEAFGVDFSKPEIAAAEINK	Eukaryota	Metazoa			Chordata	Craniata	Actinopterygii	Actinopteri	Neopterygii	Teleostei	Cypriniphysae	Cypriniformes				Cyprinoidea	Cyprinidae				Danio				Danio rerio
DAVIGIFADLFPQFSR	Eukaryota	Metazoa			Chordata	Craniata	Actinopterygii	Actinopteri	Neopterygii	Teleostei	Cypriniphysae	Cypriniformes				Cyprinoidea	Cyprinidae				Danio				Danio rerio
DDANNDPQWSEEQLLAAGFDLAGLTIGR	Eukaryota	Metazoa			Chordata	Craniata	Actinopterygii	Actinopteri	Neopterygii	Teleostei	Cypriniphysae	Cypriniformes				Cyprinoidea	Cyprinidae				Danio				Danio rerio
DDPLIMLALNSGK	Eukaryota	Metazoa			Chordata	Craniata	Actinopterygii	Actinopteri	Neopterygii	Teleostei	Cypriniphysae	Cypriniformes				Cyprinoidea	Cyprinidae				Danio				Danio rerio
DGHVIPDNSNFLETWEAMEELVDAGLVK	Eukaryota	Metazoa			Chordata	Craniata	Actinopterygii	Actinopteri	Neopterygii	Teleostei	Cypriniphysae	Cypriniformes				Cyprinoidea	Cyprinidae				Danio				Danio rerio
DLFTQLVGACLICIPDGVLK	Eukaryota	Metazoa			Chordata	Craniata	Actinopterygii	Actinopteri	Neopterygii	Teleostei	Cypriniphysae	Cypriniformes				Cyprinoidea	Cyprinidae				Danio				Danio rerio
DLHESSFSLSGAQIDDNVPK	Eukaryota	Metazoa			Chordata	Craniata	Actinopterygii	Actinopteri	Neopterygii	Teleostei	Cypriniphysae	Cypriniformes				Cyprinoidea	Cyprinidae				Danio				Danio rerio
DLHSGVFGGSVHEAMTDLIALMGTLVDNK	Eukaryota	Metazoa			Chordata	Craniata	Actinopterygii	Actinopteri	Neopterygii	Teleostei	Cypriniphysae	Cypriniformes				Cyprinoidea	Cyprinidae				Danio				Danio rerio
DLLFSVDDSISESIGGVILFHETLYQK	Eukaryota	Metazoa			Chordata	Craniata	Actinopterygii	Actinopteri	Neopterygii	Teleostei	Cypriniphysae	Cypriniformes				Cyprinoidea	Cyprinidae				Danio				Danio rerio
DILLRPELEEIMANHPTR	Eukaryota	Metazoa			Chordata	Craniata	Actinopterygii	Actinopteri	Neopterygii	Teleostei	Cypriniphysae	Cypriniformes				Cyprinoidea	Cyprinidae				Danio				Danio rerio
DLLVHPVTEEGSR	Eukaryota	Metazoa			Chordata	Craniata	Actinopterygii	Actinopteri	Neopterygii	Teleostei	Cypriniphysae	Cypriniformes				Cyprinoidea	Cyprinidae				Danio				Danio rerio
DLTEFFSQFGMIEK	Eukaryota	Metazoa			Chordata	Craniata	Actinopterygii	Actinopteri	Neopterygii	Teleostei	Cypriniphysae	Cypriniformes				Cyprinoidea	Cyprinidae				Danio				Danio rerio
DIVATNGVIHLIDEVLMPDSAK	Eukaryota	Metazoa			Chordata	Craniata	Actinopterygii	Actinopteri	Neopterygii	Teleostei	Cypriniphysae	Cypriniformes				Cyprinoidea	Cyprinidae				Danio				Danio rerio
DSHITLQQAEYEFLSFIR	Eukaryota	Metazoa			Chordata	Craniata	Actinopterygii	Actinopteri	Neopterygii	Teleostei	Cypriniphysae	Cypriniformes				Cyprinoidea	Cyprinidae				Danio				Danio rerio
DSKPEDWDER	Eukaryota	Metazoa			Chordata	Craniata	Actinopterygii	Actinopteri	Neopterygii	Teleostei	Cypriniphysae	Cypriniformes				Cyprinoidea	Cyprinidae				Danio				Danio rerio
DSIFQHPALHVLICK	Eukaryota	Metazoa			Chordata	Craniata	Actinopterygii	Actinopteri	Neopterygii	Teleostei	Cypriniphysae	Cypriniformes				Cyprinoidea	Cyprinidae				Danio				Danio rerio
DVTEALILQVFSQIGPCK	Eukaryota	Metazoa			Chordata	Craniata	Actinopterygii	Actinopteri	Neopterygii	Teleostei	Cypriniphysae	Cypriniformes				Cyprinoidea	Cyprinidae				Danio				Danio rerio
DVYNDSALVIWNRPR	Eukaryota	Metazoa			Chordata	Craniata	Actinopterygii	Actinopteri	Neopterygii	Teleostei	Cypriniphysae	Cypriniformes				Cyprinoidea	Cyprinidae				Danio				Danio rerio
DYVIVAWK	Eukaryota	Metazoa			Chordata	Craniata	Actinopterygii	Actinopteri	Neopterygii	Teleostei	Cypriniphysae	Cypriniformes				Cyprinoidea	Cyprinidae				Danio				Danio rerio
DYYFALSHTVR	Eukaryota	Metazoa			Chordata	Craniata	Actinopterygii	Actinopteri	Neopterygii	Teleostei	Cypriniphysae	Cypriniformes				Cyprinoidea	Cyprinidae				Danio				Danio rerio
EEQLTSMEAELTQLR	Eukaryota	Metazoa			Chordata	Craniata	Actinopterygii	Actinopteri	Neopterygii	Teleostei	Cypriniphysae	Cypriniformes				Cyprinoidea	Cyprinidae				Danio				Danio rerio
EEYYEAMQAFK	Eukaryota	Metazoa			Chordata	Craniata	Actinopterygii	Actinopteri	Neopterygii	Teleostei	Cypriniphysae	Cypriniformes				Cyprinoidea	Cyprinidae				Danio				Danio rerio
EGATVYATGTHAHLEDGK	Eukaryota	Metazoa			Chordata	Craniata	Actinopterygii	Actinopteri	Neopterygii	Teleostei	Cypriniphysae	Cypriniformes				Cyprinoidea	Cyprinidae				Danio				Danio rerio
EGLHYTEVCGYDTTALSAGPLFR	Eukaryota	Metazoa			Chordata	Craniata	Actinopterygii	Actinopteri	Neopterygii	Teleostei	Cypriniphysae	Cypriniformes				Cyprinoidea	Cyprinidae				Danio				Danio rerio
EHAIPLLDAQVATGGIIDPVNSHR	Eukaryota	Metazoa			Chordata	Craniata	Actinopterygii	Actinopteri	Neopterygii	Teleostei	Cypriniphysae	Cypriniformes				Cyprinoidea	Cyprinidae				Danio				Danio rerio
ELFDPVISDR	Eukaryota	Metazoa			Chordata	Craniata	Actinopterygii	Actinopteri	Neopterygii	Teleostei	Cypriniphysae	Cypriniformes				Cyprinoidea	Cyprinidae				Danio				Danio rerio
ELLDYSGTGISILEMSHR	Eukaryota	Metazoa			Chordata	Craniata	Actinopterygii	Actinopteri	Neopterygii	Teleostei	Cypriniphysae	Cypriniformes				Cyprinoidea	Cyprinidae				Danio				Danio rerio
EISHYFSADDVAK	Eukaryota	Metazoa			Chordata	Craniata	Actinopterygii	Actinopteri	Neopterygii	Teleostei	Cypriniphysae	Cypriniformes				Cyprinoidea	Cyprinidae				Danio				Danio rerio
ELTDAISHVDR	Eukaryota	Metazoa			Chordata	Craniata	Actinopterygii	Actinopteri	Neopterygii	Teleostei	Cypriniphysae	Cypriniformes				Cyprinoidea	Cyprinidae				Danio				Danio rerio
ELWDWLYSLEAEK	Eukaryota	Metazoa			Chordata	Craniata	Actinopterygii	Actinopteri	Neopterygii	Teleostei	Cypriniphysae	Cypriniformes				Cyprinoidea	Cyprinidae				Danio				Danio rerio
EVNQEVYSFLASAGAK	Eukaryota	Metazoa			Chordata	Craniata	Actinopterygii	Actinopteri	Neopterygii	Teleostei	Cypriniphysae	Cypriniformes				Cyprinoidea	Cyprinidae				Danio				Danio rerio
EVSFQPEGEEDWK	Eukaryota	Metazoa			Chordata	Craniata	Actinopterygii	Actinopteri	Neopterygii	Teleostei	Cypriniphysae	Cypriniformes				Cyprinoidea	Cyprinidae				Danio				Danio rerio
EVYPHVPTVISICLK	Eukaryota	Metazoa			Chordata	Craniata	Actinopterygii	Actinopteri	Neopterygii	Teleostei	Cypriniphysae	Cypriniformes				Cyprinoidea	Cyprinidae				Danio				Danio rerio
FAEAEHWLDYFPPLAVEDLK	Eukaryota	Metazoa			Chordata	Craniata	Actinopterygii	Actinopteri	Neopterygii	Teleostei	Cypriniphysae	Cypriniformes				Cyprinoidea	Cyprinidae				Danio				Danio rerio
FALIHPSLVEGLVLINVDPCAEGWIDWAASK	Eukaryota	Metazoa			Chordata	Craniata	Actinopterygii	Actinopteri	Neopterygii	Teleostei	Cypriniphysae	Cypriniformes				Cyprinoidea	Cyprinidae				Danio				Danio rerio
FAVDEEFPDLSQHNNHMSK	Eukaryota	Metazoa			Chordata	Craniata	Actinopterygii	Actinopteri	Neopterygii	Teleostei	Cypriniphysae	Cypriniformes				Cyprinoidea	Cyprinidae				Danio				Danio rerio
FDPYEHEAVFHAPVEGK	Eukaryota	Metazoa			Chordata	Craniata	Actinopterygii	Actinopteri	Neopterygii	Teleostei	Cypriniphysae	Cypriniformes				Cyprinoidea	Cyprinidae				Danio				Danio rerio
FGQITPMEIDILFQLSGLHSQTGR	Eukaryota	Metazoa			Chordata	Craniata	Actinopterygii	Actinopteri	Neopterygii	Teleostei	Cypriniphysae	Cypriniformes				Cyprinoidea	Cyprinidae				Danio				Danio rerio
FHHPEVLGLLK	Eukaryota	Metazoa			Chordata	Craniata	Actinopterygii	Actinopteri	Neopterygii	Teleostei	Cypriniphysae	Cypriniformes				Cyprinoidea	Cyprinidae				Danio				Danio rerio
FHLPVDLLSLELAK	Eukaryota	Metazoa			Chordata	Craniata	Actinopterygii	Actinopteri	Neopterygii	Teleostei	Cypriniphysae	Cypriniformes				Cyprinoidea	Cyprinidae				Danio				Danio rerio
FHTPDHWFPADLQK	Eukaryota	Metazoa			Chordata	Craniata	Actinopterygii	Actinopteri	Neopterygii	Teleostei	Cypriniphysae	Cypriniformes				Cyprinoidea	Cyprinidae				Danio				Danio rerio
FLQDSVEHCIIGVTILSQLTNEINQADSTHPLTK	Eukaryota	Metazoa			Chordata	Craniata	Actinopterygii	Actinopteri	Neopterygii	Teleostei	Cypriniphysae	Cypriniformes				Cyprinoidea	Cyprinidae				Danio				Danio rerio
FITAEVVEQYFQHLIR	Eukaryota	Metazoa			Chordata	Craniata	Actinopterygii	Actinopteri	Neopterygii	Teleostei	Cypriniphysae	Cypriniformes				Cyprinoidea	Cyprinidae				Danio				Danio rerio
FNLPVDMVAFEHAK	Eukaryota	Metazoa			Chordata	Craniata	Actinopterygii	Actinopteri	Neopterygii	Teleostei	Cypriniphysae	Cypriniformes				Cyprinoidea	Cyprinidae				Danio				Danio rerio
FSCVPVDFEVVHVNSSSTSEDDISNAIMAIR	Eukaryota	Metazoa			Chordata	Craniata	Actinopterygii	Actinopteri	Neopterygii	Teleostei	Cypriniphysae	Cypriniformes				Cyprinoidea	Cyprinidae				Danio				Danio rerio
FSGISQGDLAGSPAVAAHGATVLK	Eukaryota	Metazoa			Chordata	Craniata	Actinopterygii	Actinopteri	Neopterygii	Teleostei	Cypriniphysae	Cypriniformes				Cyprinoidea	Cyprinidae				Danio				Danio rerio
FSVHQLSEQDTEVK	Eukaryota	Metazoa			Chordata	Craniata	Actinopterygii	Actinopteri	Neopterygii	Teleostei	Cypriniphysae	Cypriniformes				Cyprinoidea	Cyprinidae				Danio				Danio rerio
FWFENQPHVR	Eukaryota	Metazoa			Chordata	Craniata	Actinopterygii	Actinopteri	Neopterygii	Teleostei	Cypriniphysae	Cypriniformes				Cyprinoidea	Cyprinidae				Danio				Danio rerio
GAHAGQGLGNAFLSNIFACDAIFHMTR	Eukaryota	Metazoa			Chordata	Craniata	Actinopterygii	Actinopteri	Neopterygii	Teleostei	Cypriniphysae	Cypriniformes				Cyprinoidea	Cyprinidae				Danio				Danio rerio
GAHVFFTDAIPDSLFNLLSK	Eukaryota	Metazoa			Chordata	Craniata	Actinopterygii	Actinopteri	Neopterygii	Teleostei	Cypriniphysae	Cypriniformes				Cyprinoidea	Cyprinidae				Danio				Danio rerio
GEYPIESVLTQHLIAR	Eukaryota	Metazoa			Chordata	Craniata	Actinopterygii	Actinopteri	Neopterygii	Teleostei	Cypriniphysae	Cypriniformes				Cyprinoidea	Cyprinidae				Danio				Danio rerio
GFGGPQGLTIIESVLHEVAVK	Eukaryota	Metazoa			Chordata	Craniata	Actinopterygii	Actinopteri	Neopterygii	Teleostei	Cypriniphysae	Cypriniformes				Cyprinoidea	Cyprinidae				Danio				Danio rerio
GGLPNFLDHIIASVVETK	Eukaryota	Metazoa			Chordata	Craniata	Actinopterygii	Actinopteri	Neopterygii	Teleostei	Cypriniphysae	Cypriniformes				Cyprinoidea	Cyprinidae				Danio				Danio rerio
GHLDNISNNLLIGAVNIENDGVNK	Eukaryota	Metazoa			Chordata	Craniata	Actinopterygii	Actinopteri	Neopterygii	Teleostei	Cypriniphysae	Cypriniformes				Cyprinoidea	Cyprinidae				Danio				Danio rerio
GICTVNVVDRPQPPEGPVIFDEIYR	Eukaryota	Metazoa			Chordata	Craniata	Actinopterygii	Actinopteri	Neopterygii	Teleostei	Cypriniphysae	Cypriniformes				Cyprinoidea	Cyprinidae				Danio				Danio rerio
GLEYNVLHLIEGAEYK	Eukaryota	Metazoa			Chordata	Craniata	Actinopterygii	Actinopteri	Neopterygii	Teleostei	Cypriniphysae	Cypriniformes				Cyprinoidea	Cyprinidae				Danio				Danio rerio
GLQTSQDAHFYAMSAR	Eukaryota	Metazoa			Chordata	Craniata	Actinopterygii	Actinopteri	Neopterygii	Teleostei	Cypriniphysae	Cypriniformes				Cyprinoidea	Cyprinidae				Danio				Danio rerio
GPPPSHLDITPQSDATPTSFHLTNGDAVQSQSSAMK	Eukaryota	Metazoa			Chordata	Craniata	Actinopterygii	Actinopteri	Neopterygii	Teleostei	Cypriniphysae	Cypriniformes				Cyprinoidea	Cyprinidae				Danio				Danio rerio
GQEIINNTAYHQVIITR	Eukaryota	Metazoa			Chordata	Craniata	Actinopterygii	Actinopteri	Neopterygii	Teleostei	Cypriniphysae	Cypriniformes				Cyprinoidea	Cyprinidae				Danio				Danio rerio
GSSLFEALNLLQDK	Eukaryota	Metazoa			Chordata	Craniata	Actinopterygii	Actinopteri	Neopterygii	Teleostei	Cypriniphysae	Cypriniformes				Cyprinoidea	Cyprinidae				Danio				Danio rerio
GVDACHLLAPHNADFAFSLYK	Eukaryota	Metazoa			Chordata	Craniata	Actinopterygii	Actinopteri	Neopterygii	Teleostei	Cypriniphysae	Cypriniformes				Cyprinoidea	Cyprinidae				Danio				Danio rerio
GYGYLEEILSLAKPFGTVVR	Eukaryota	Metazoa			Chordata	Craniata	Actinopterygii	Actinopteri	Neopterygii	Teleostei	Cypriniphysae	Cypriniformes				Cyprinoidea	Cyprinidae				Danio				Danio rerio
GYIFLEYSAPSHAHEAVK	Eukaryota	Metazoa			Chordata	Craniata	Actinopterygii	Actinopteri	Neopterygii	Teleostei	Cypriniphysae	Cypriniformes				Cyprinoidea	Cyprinidae				Danio				Danio rerio
HADSVSDLGEQIDNLQR	Eukaryota	Metazoa			Chordata	Craniata	Actinopterygii	Actinopteri	Neopterygii	Teleostei	Cypriniphysae	Cypriniformes				Cyprinoidea	Cyprinidae				Danio				Danio rerio
HAITSSESLSELAQK	Eukaryota	Metazoa			Chordata	Craniata	Actinopterygii	Actinopteri	Neopterygii	Teleostei	Cypriniphysae	Cypriniformes				Cyprinoidea	Cyprinidae				Danio				Danio rerio
HGAIPPLLALLAVPDLSVFPAGYLR	Eukaryota	Metazoa			Chordata	Craniata	Actinopterygii	Actinopteri	Neopterygii	Teleostei	Cypriniphysae	Cypriniformes				Cyprinoidea	Cyprinidae				Danio				Danio rerio
HGLTEADVGIHR	Eukaryota	Metazoa			Chordata	Craniata	Actinopterygii	Actinopteri	Neopterygii	Teleostei	Cypriniphysae	Cypriniformes				Cyprinoidea	Cyprinidae				Danio				Danio rerio
HGVSLAALK	Eukaryota	Metazoa			Chordata	Craniata	Actinopterygii	Actinopteri	Neopterygii	Teleostei	Cypriniphysae	Cypriniformes				Cyprinoidea	Cyprinidae				Danio				Danio rerio
HIDIEPQNTHILDGNASNLQTECESFEQK	Eukaryota	Metazoa			Chordata	Craniata	Actinopterygii	Actinopteri	Neopterygii	Teleostei	Cypriniphysae	Cypriniformes				Cyprinoidea	Cyprinidae				Danio				Danio rerio
HLEWETALTNTTGCLR	Eukaryota	Metazoa			Chordata	Craniata	Actinopterygii	Actinopteri	Neopterygii	Teleostei	Cypriniphysae	Cypriniformes				Cyprinoidea	Cyprinidae				Danio				Danio rerio
HLFSLSLDAVTK	Eukaryota	Metazoa			Chordata	Craniata	Actinopterygii	Actinopteri	Neopterygii	Teleostei	Cypriniphysae	Cypriniformes				Cyprinoidea	Cyprinidae				Danio				Danio rerio
HPDEPVLLEEPAIAALAK	Eukaryota	Metazoa			Chordata	Craniata	Actinopterygii	Actinopteri	Neopterygii	Teleostei	Cypriniphysae	Cypriniformes				Cyprinoidea	Cyprinidae				Danio				Danio rerio
HPFDPPSEPLNCCVNK	Eukaryota	Metazoa			Chordata	Craniata	Actinopterygii	Actinopteri	Neopterygii	Teleostei	Cypriniphysae	Cypriniformes				Cyprinoidea	Cyprinidae				Danio				Danio rerio
HPFNAPGAPAPPVVVSIR	Eukaryota	Metazoa			Chordata	Craniata	Actinopterygii	Actinopteri	Neopterygii	Teleostei	Cypriniphysae	Cypriniformes				Cyprinoidea	Cyprinidae				Danio				Danio rerio
HQALQAEISGHEPR	Eukaryota	Metazoa			Chordata	Craniata	Actinopterygii	Actinopteri	Neopterygii	Teleostei	Cypriniphysae	Cypriniformes				Cyprinoidea	Cyprinidae				Danio				Danio rerio
HQTGAGLVHALVAIEGASATSAEATAFSVLQHVLGAGPR	Eukaryota	Metazoa			Chordata	Craniata	Actinopterygii	Actinopteri	Neopterygii	Teleostei	Cypriniphysae	Cypriniformes				Cyprinoidea	Cyprinidae				Danio				Danio rerio
HTIVGLNPGTEYQIGVQAIK	Eukaryota	Metazoa			Chordata	Craniata	Actinopterygii	Actinopteri	Neopterygii	Teleostei	Cypriniphysae	Cypriniformes				Cyprinoidea	Cyprinidae				Danio				Danio rerio
HTYYAQVSVPR	Eukaryota	Metazoa			Chordata	Craniata	Actinopterygii	Actinopteri	Neopterygii	Teleostei	Cypriniphysae	Cypriniformes				Cyprinoidea	Cyprinidae				Danio				Danio rerio
HVASFAYSHIK	Eukaryota	Metazoa			Chordata	Craniata	Actinopterygii	Actinopteri	Neopterygii	Teleostei	Cypriniphysae	Cypriniformes				Cyprinoidea	Cyprinidae				Danio				Danio rerio
HVGDLGNVTADASGVAK	Eukaryota	Metazoa			Chordata	Craniata	Actinopterygii	Actinopteri	Neopterygii	Teleostei	Cypriniphysae	Cypriniformes				Cyprinoidea	Cyprinidae				Danio				Danio rerio
HYNEFCAFQPQIQSVR	Eukaryota	Metazoa			Chordata	Craniata	Actinopterygii	Actinopteri	Neopterygii	Teleostei	Cypriniphysae	Cypriniformes				Cyprinoidea	Cyprinidae				Danio				Danio rerio
HYSLQQLLDPSTVTADHLDYR	Eukaryota	Metazoa			Chordata	Craniata	Actinopterygii	Actinopteri	Neopterygii	Teleostei	Cypriniphysae	Cypriniformes				Cyprinoidea	Cyprinidae				Danio				Danio rerio
LAEQFDEASVHLWELLEGR	Eukaryota	Metazoa			Chordata	Craniata	Actinopterygii	Actinopteri	Neopterygii	Teleostei	Cypriniphysae	Cypriniformes				Cyprinoidea	Cyprinidae				Danio				Danio rerio
LDFNLADAINQDFLNTR	Eukaryota	Metazoa			Chordata	Craniata	Actinopterygii	Actinopteri	Neopterygii	Teleostei	Cypriniphysae	Cypriniformes				Cyprinoidea	Cyprinidae				Danio				Danio rerio
LDNNEALLGSYHVDDDCR	Eukaryota	Metazoa			Chordata	Craniata	Actinopterygii	Actinopteri	Neopterygii	Teleostei	Cypriniphysae	Cypriniformes				Cyprinoidea	Cyprinidae				Danio				Danio rerio
LDPNTPDHLIGLLGNDIINVVASDHR	Eukaryota	Metazoa			Chordata	Craniata	Actinopterygii	Actinopteri	Neopterygii	Teleostei	Cypriniphysae	Cypriniformes				Cyprinoidea	Cyprinidae				Danio				Danio rerio
LDTLLAVQELLEDGALELFHR	Eukaryota	Metazoa			Chordata	Craniata	Actinopterygii	Actinopteri	Neopterygii	Teleostei	Cypriniphysae	Cypriniformes				Cyprinoidea	Cyprinidae				Danio				Danio rerio
IDVQSPSCSPTAVVWHPQHSSTIAYGDELGR	Eukaryota	Metazoa			Chordata	Craniata	Actinopterygii	Actinopteri	Neopterygii	Teleostei	Cypriniphysae	Cypriniformes				Cyprinoidea	Cyprinidae				Danio				Danio rerio
LEELSVNDDK	Eukaryota	Metazoa			Chordata	Craniata	Actinopterygii	Actinopteri	Neopterygii	Teleostei	Cypriniphysae	Cypriniformes				Cyprinoidea	Cyprinidae				Danio				Danio rerio
IEESYSTNTDSYAEHFIEK	Eukaryota	Metazoa			Chordata	Craniata	Actinopterygii	Actinopteri	Neopterygii	Teleostei	Cypriniphysae	Cypriniformes				Cyprinoidea	Cyprinidae				Danio				Danio rerio
IEFNEIIHEIYR	Eukaryota	Metazoa			Chordata	Craniata	Actinopterygii	Actinopteri	Neopterygii	Teleostei	Cypriniphysae	Cypriniformes				Cyprinoidea	Cyprinidae				Danio				Danio rerio
LEPEWSIFSGNTPLTVSGTNLDIIHTPLIR	Eukaryota	Metazoa			Chordata	Craniata	Actinopterygii	Actinopteri	Neopterygii	Teleostei	Cypriniphysae	Cypriniformes				Cyprinoidea	Cyprinidae				Danio				Danio rerio
LESSSGILEVLHCILNESPESLNIIQK	Eukaryota	Metazoa			Chordata	Craniata	Actinopterygii	Actinopteri	Neopterygii	Teleostei	Cypriniphysae	Cypriniformes				Cyprinoidea	Cyprinidae				Danio				Danio rerio
IETVGCISPHTEAK	Eukaryota	Metazoa			Chordata	Craniata	Actinopterygii	Actinopteri	Neopterygii	Teleostei	Cypriniphysae	Cypriniformes				Cyprinoidea	Cyprinidae				Danio				Danio rerio
LEVGALVLGCLIPLVLSIGHQH	Eukaryota	Metazoa			Chordata	Craniata	Actinopterygii	Actinopteri	Neopterygii	Teleostei	Cypriniphysae	Cypriniformes				Cyprinoidea	Cyprinidae				Danio				Danio rerio
LEVGNHHWTQCNDTPVK	Eukaryota	Metazoa			Chordata	Craniata	Actinopterygii	Actinopteri	Neopterygii	Teleostei	Cypriniphysae	Cypriniformes				Cyprinoidea	Cyprinidae				Danio				Danio rerio
IFLFDQENFQGR	Eukaryota	Metazoa			Chordata	Craniata	Actinopterygii	Actinopteri	Neopterygii	Teleostei	Cypriniphysae	Cypriniformes				Cyprinoidea	Cyprinidae				Danio				Danio rerio
LFLHNNVVYHEQHVER	Eukaryota	Metazoa			Chordata	Craniata	Actinopterygii	Actinopteri	Neopterygii	Teleostei	Cypriniphysae	Cypriniformes				Cyprinoidea	Cyprinidae				Danio				Danio rerio
LFLNAEGAAK	Eukaryota	Metazoa			Chordata	Craniata	Actinopterygii	Actinopteri	Neopterygii	Teleostei	Cypriniphysae	Cypriniformes				Cyprinoidea	Cyprinidae				Danio				Danio rerio
LFTWVEWVK	Eukaryota	Metazoa			Chordata	Craniata	Actinopterygii	Actinopteri	Neopterygii	Teleostei	Cypriniphysae	Cypriniformes				Cyprinoidea	Cyprinidae				Danio				Danio rerio
IGAEEFAALVK	Eukaryota	Metazoa			Chordata	Craniata	Actinopterygii	Actinopteri	Neopterygii	Teleostei	Cypriniphysae	Cypriniformes				Cyprinoidea	Cyprinidae				Danio				Danio rerio
IGGLEEGIEYEFR	Eukaryota	Metazoa			Chordata	Craniata	Actinopterygii	Actinopteri	Neopterygii	Teleostei	Cypriniphysae	Cypriniformes				Cyprinoidea	Cyprinidae				Danio				Danio rerio
IGGILANELSVDEAALHAAVFAINEAIDK	Eukaryota	Metazoa			Chordata	Craniata	Actinopterygii	Actinopteri	Neopterygii	Teleostei	Cypriniphysae	Cypriniformes				Cyprinoidea	Cyprinidae				Danio				Danio rerio
LGQDLINVR	Eukaryota	Metazoa			Chordata	Craniata	Actinopterygii	Actinopteri	Neopterygii	Teleostei	Cypriniphysae	Cypriniformes				Cyprinoidea	Cyprinidae				Danio				Danio rerio
IGSVHSGVPEQNPCFTGR	Eukaryota	Metazoa			Chordata	Craniata	Actinopterygii	Actinopteri	Neopterygii	Teleostei	Cypriniphysae	Cypriniformes				Cyprinoidea	Cyprinidae				Danio				Danio rerio
LGTVGAEPFSAK	Eukaryota	Metazoa			Chordata	Craniata	Actinopterygii	Actinopteri	Neopterygii	Teleostei	Cypriniphysae	Cypriniformes				Cyprinoidea	Cyprinidae				Danio				Danio rerio
IGTVVSVLIDVLTTR	Eukaryota	Metazoa			Chordata	Craniata	Actinopterygii	Actinopteri	Neopterygii	Teleostei	Cypriniphysae	Cypriniformes				Cyprinoidea	Cyprinidae				Danio				Danio rerio
LGVVKPGLTEDALWR	Eukaryota	Metazoa			Chordata	Craniata	Actinopterygii	Actinopteri	Neopterygii	Teleostei	Cypriniphysae	Cypriniformes				Cyprinoidea	Cyprinidae				Danio				Danio rerio
IKPCIGGVILFHETLYQK	Eukaryota	Metazoa			Chordata	Craniata	Actinopterygii	Actinopteri	Neopterygii	Teleostei	Cypriniphysae	Cypriniformes				Cyprinoidea	Cyprinidae				Danio				Danio rerio
LLCIPTQLYSQHFQK	Eukaryota	Metazoa			Chordata	Craniata	Actinopterygii	Actinopteri	Neopterygii	Teleostei	Cypriniphysae	Cypriniformes				Cyprinoidea	Cyprinidae				Danio				Danio rerio
ILHATGVNGGIYLSIDNAK	Eukaryota	Metazoa			Chordata	Craniata	Actinopterygii	Actinopteri	Neopterygii	Teleostei	Cypriniphysae	Cypriniformes				Cyprinoidea	Cyprinidae				Danio				Danio rerio
LIHEPSAALLAYDIGQDSPLGK	Eukaryota	Metazoa			Chordata	Craniata	Actinopterygii	Actinopteri	Neopterygii	Teleostei	Cypriniphysae	Cypriniformes				Cyprinoidea	Cyprinidae				Danio				Danio rerio
LLHLYLAHNELEAVPLIPETVR	Eukaryota	Metazoa			Chordata	Craniata	Actinopterygii	Actinopteri	Neopterygii	Teleostei	Cypriniphysae	Cypriniformes				Cyprinoidea	Cyprinidae				Danio				Danio rerio
LLPEFPGVPVGLQEDNGVQYLFEVYESIK	Eukaryota	Metazoa			Chordata	Craniata	Actinopterygii	Actinopteri	Neopterygii	Teleostei	Cypriniphysae	Cypriniformes				Cyprinoidea	Cyprinidae				Danio				Danio rerio
ILQMEEEYVQQICEDIIR	Eukaryota	Metazoa			Chordata	Craniata	Actinopterygii	Actinopteri	Neopterygii	Teleostei	Cypriniphysae	Cypriniformes				Cyprinoidea	Cyprinidae				Danio				Danio rerio
ILSESEVDTHLVSLSER	Eukaryota	Metazoa			Chordata	Craniata	Actinopterygii	Actinopteri	Neopterygii	Teleostei	Cypriniphysae	Cypriniformes				Cyprinoidea	Cyprinidae				Danio				Danio rerio
LLSSLGGSSLAHGLLAELR	Eukaryota	Metazoa			Chordata	Craniata	Actinopterygii	Actinopteri	Neopterygii	Teleostei	Cypriniphysae	Cypriniformes				Cyprinoidea	Cyprinidae				Danio				Danio rerio
LISVSNSLYSVTGTEIK	Eukaryota	Metazoa			Chordata	Craniata	Actinopterygii	Actinopteri	Neopterygii	Teleostei	Cypriniphysae	Cypriniformes				Cyprinoidea	Cyprinidae				Danio				Danio rerio
LITVQTWLTGR	Eukaryota	Metazoa			Chordata	Craniata	Actinopterygii	Actinopteri	Neopterygii	Teleostei	Cypriniphysae	Cypriniformes				Cyprinoidea	Cyprinidae				Danio				Danio rerio
LLVLEMPLAHK	Eukaryota	Metazoa			Chordata	Craniata	Actinopterygii	Actinopteri	Neopterygii	Teleostei	Cypriniphysae	Cypriniformes				Cyprinoidea	Cyprinidae				Danio				Danio rerio
LLWTILAENVIDCHFVANK	Eukaryota	Metazoa			Chordata	Craniata	Actinopterygii	Actinopteri	Neopterygii	Teleostei	Cypriniphysae	Cypriniformes				Cyprinoidea	Cyprinidae				Danio				Danio rerio
INADIAGRPLPVASWTK	Eukaryota	Metazoa			Chordata	Craniata	Actinopterygii	Actinopteri	Neopterygii	Teleostei	Cypriniphysae	Cypriniformes				Cyprinoidea	Cyprinidae				Danio				Danio rerio
INELEGALSHEK	Eukaryota	Metazoa			Chordata	Craniata	Actinopterygii	Actinopteri	Neopterygii	Teleostei	Cypriniphysae	Cypriniformes				Cyprinoidea	Cyprinidae				Danio				Danio rerio
LNTVLDELSAVFGSSFKPVIEDCVK	Eukaryota	Metazoa			Chordata	Craniata	Actinopterygii	Actinopteri	Neopterygii	Teleostei	Cypriniphysae	Cypriniformes				Cyprinoidea	Cyprinidae				Danio				Danio rerio
LPHGVFTTDFEEFVTK	Eukaryota	Metazoa			Chordata	Craniata	Actinopterygii	Actinopteri	Neopterygii	Teleostei	Cypriniphysae	Cypriniformes				Cyprinoidea	Cyprinidae				Danio				Danio rerio
LPIIVTTYAK	Eukaryota	Metazoa			Chordata	Craniata	Actinopterygii	Actinopteri	Neopterygii	Teleostei	Cypriniphysae	Cypriniformes				Cyprinoidea	Cyprinidae				Danio				Danio rerio
IPNLLEEIQNNLFK	Eukaryota	Metazoa			Chordata	Craniata	Actinopterygii	Actinopteri	Neopterygii	Teleostei	Cypriniphysae	Cypriniformes				Cyprinoidea	Cyprinidae				Danio				Danio rerio
LQEVVEELGNK	Eukaryota	Metazoa			Chordata	Craniata	Actinopterygii	Actinopteri	Neopterygii	Teleostei	Cypriniphysae	Cypriniformes				Cyprinoidea	Cyprinidae				Danio				Danio rerio
LRPDLYVVAELFTGSEELDNVFVTR	Eukaryota	Metazoa			Chordata	Craniata	Actinopterygii	Actinopteri	Neopterygii	Teleostei	Cypriniphysae	Cypriniformes				Cyprinoidea	Cyprinidae				Danio				Danio rerio
ISDATAQIVEVLTHLVANNK	Eukaryota	Metazoa			Chordata	Craniata	Actinopterygii	Actinopteri	Neopterygii	Teleostei	Cypriniphysae	Cypriniformes				Cyprinoidea	Cyprinidae				Danio				Danio rerio
LSFTGQQINEAACDLAR	Eukaryota	Metazoa			Chordata	Craniata	Actinopterygii	Actinopteri	Neopterygii	Teleostei	Cypriniphysae	Cypriniformes				Cyprinoidea	Cyprinidae				Danio				Danio rerio
LSGLPALILPHPELCK	Eukaryota	Metazoa			Chordata	Craniata	Actinopterygii	Actinopteri	Neopterygii	Teleostei	Cypriniphysae	Cypriniformes				Cyprinoidea	Cyprinidae				Danio				Danio rerio
LSGWVSVTQLLDR	Eukaryota	Metazoa			Chordata	Craniata	Actinopterygii	Actinopteri	Neopterygii	Teleostei	Cypriniphysae	Cypriniformes				Cyprinoidea	Cyprinidae				Danio				Danio rerio
LSGYQHQVTVLEEQIVQLR	Eukaryota	Metazoa			Chordata	Craniata	Actinopterygii	Actinopteri	Neopterygii	Teleostei	Cypriniphysae	Cypriniformes				Cyprinoidea	Cyprinidae				Danio				Danio rerio
LSLSTTISTELPLTHLR	Eukaryota	Metazoa			Chordata	Craniata	Actinopterygii	Actinopteri	Neopterygii	Teleostei	Cypriniphysae	Cypriniformes				Cyprinoidea	Cyprinidae				Danio				Danio rerio
LSNLTDLLLCLSSVSFSVM	Eukaryota	Metazoa			Chordata	Craniata	Actinopterygii	Actinopteri	Neopterygii	Teleostei	Cypriniphysae	Cypriniformes				Cyprinoidea	Cyprinidae				Danio				Danio rerio
LSSGTDELK	Eukaryota	Metazoa			Chordata	Craniata	Actinopterygii	Actinopteri	Neopterygii	Teleostei	Cypriniphysae	Cypriniformes				Cyprinoidea	Cyprinidae				Danio				Danio rerio
ISYLLGSNSAELLK	Eukaryota	Metazoa			Chordata	Craniata	Actinopterygii	Actinopteri	Neopterygii	Teleostei	Cypriniphysae	Cypriniformes				Cyprinoidea	Cyprinidae				Danio				Danio rerio
ITAFPPGHFEVFDLK	Eukaryota	Metazoa			Chordata	Craniata	Actinopterygii	Actinopteri	Neopterygii	Teleostei	Cypriniphysae	Cypriniformes				Cyprinoidea	Cyprinidae				Danio				Danio rerio
ITFTNEEFLVTLPDDSEIHFPNR	Eukaryota	Metazoa			Chordata	Craniata	Actinopterygii	Actinopteri	Neopterygii	Teleostei	Cypriniphysae	Cypriniformes				Cyprinoidea	Cyprinidae				Danio				Danio rerio
LTHLNFDQWIVVLK	Eukaryota	Metazoa			Chordata	Craniata	Actinopterygii	Actinopteri	Neopterygii	Teleostei	Cypriniphysae	Cypriniformes				Cyprinoidea	Cyprinidae				Danio				Danio rerio
LTHLNTEQWFVVLK	Eukaryota	Metazoa			Chordata	Craniata	Actinopterygii	Actinopteri	Neopterygii	Teleostei	Cypriniphysae	Cypriniformes				Cyprinoidea	Cyprinidae				Danio				Danio rerio
LVFDHQNDGTTQALGTCLR	Eukaryota	Metazoa			Chordata	Craniata	Actinopterygii	Actinopteri	Neopterygii	Teleostei	Cypriniphysae	Cypriniformes				Cyprinoidea	Cyprinidae				Danio				Danio rerio
LVYEILSELDLGDFR	Eukaryota	Metazoa			Chordata	Craniata	Actinopterygii	Actinopteri	Neopterygii	Teleostei	Cypriniphysae	Cypriniformes				Cyprinoidea	Cyprinidae				Danio				Danio rerio
LYHISDAQGSLVVQEVAVKPLTQDLLK	Eukaryota	Metazoa			Chordata	Craniata	Actinopterygii	Actinopteri	Neopterygii	Teleostei	Cypriniphysae	Cypriniformes				Cyprinoidea	Cyprinidae				Danio				Danio rerio
IYLSTLPQALNSLVPDLDEIDHLSWSGVQK	Eukaryota	Metazoa			Chordata	Craniata	Actinopterygii	Actinopteri	Neopterygii	Teleostei	Cypriniphysae	Cypriniformes				Cyprinoidea	Cyprinidae				Danio				Danio rerio
MFDSSTLEHVK	Eukaryota	Metazoa			Chordata	Craniata	Actinopterygii	Actinopteri	Neopterygii	Teleostei	Cypriniphysae	Cypriniformes				Cyprinoidea	Cyprinidae				Danio				Danio rerio
MNLPILTANANHQLTADNK	Eukaryota	Metazoa			Chordata	Craniata	Actinopterygii	Actinopteri	Neopterygii	Teleostei	Cypriniphysae	Cypriniformes				Cyprinoidea	Cyprinidae				Danio				Danio rerio
NDLQLAVASESENLSDAEER	Eukaryota	Metazoa			Chordata	Craniata	Actinopterygii	Actinopteri	Neopterygii	Teleostei	Cypriniphysae	Cypriniformes				Cyprinoidea	Cyprinidae				Danio				Danio rerio
NHTGIYILTVSNSAGSK	Eukaryota	Metazoa			Chordata	Craniata	Actinopterygii	Actinopteri	Neopterygii	Teleostei	Cypriniphysae	Cypriniformes				Cyprinoidea	Cyprinidae				Danio				Danio rerio
NLHFDWFHDDFLFGTSADVYMLQNESPIPTK	Eukaryota	Metazoa			Chordata	Craniata	Actinopterygii	Actinopteri	Neopterygii	Teleostei	Cypriniphysae	Cypriniformes				Cyprinoidea	Cyprinidae				Danio				Danio rerio
NLHHVDADK	Eukaryota	Metazoa			Chordata	Craniata	Actinopterygii	Actinopteri	Neopterygii	Teleostei	Cypriniphysae	Cypriniformes				Cyprinoidea	Cyprinidae				Danio				Danio rerio
NLLCHFYVHDLQSR	Eukaryota	Metazoa			Chordata	Craniata	Actinopterygii	Actinopteri	Neopterygii	Teleostei	Cypriniphysae	Cypriniformes				Cyprinoidea	Cyprinidae				Danio				Danio rerio
NILIQSSELFR	Eukaryota	Metazoa			Chordata	Craniata	Actinopterygii	Actinopteri	Neopterygii	Teleostei	Cypriniphysae	Cypriniformes				Cyprinoidea	Cyprinidae				Danio				Danio rerio
NLLQNPSPYGVNHTVPPPEPHR	Eukaryota	Metazoa			Chordata	Craniata	Actinopterygii	Actinopteri	Neopterygii	Teleostei	Cypriniphysae	Cypriniformes				Cyprinoidea	Cyprinidae				Danio				Danio rerio
NINAEEVAVGDLVEVK	Eukaryota	Metazoa			Chordata	Craniata	Actinopterygii	Actinopteri	Neopterygii	Teleostei	Cypriniphysae	Cypriniformes				Cyprinoidea	Cyprinidae				Danio				Danio rerio
NLYRPDFIQQLK	Eukaryota	Metazoa			Chordata	Craniata	Actinopterygii	Actinopteri	Neopterygii	Teleostei	Cypriniphysae	Cypriniformes				Cyprinoidea	Cyprinidae				Danio				Danio rerio
NMAEIGAVHISNPK	Eukaryota	Metazoa			Chordata	Craniata	Actinopterygii	Actinopteri	Neopterygii	Teleostei	Cypriniphysae	Cypriniformes				Cyprinoidea	Cyprinidae				Danio				Danio rerio
NPEILAITPILLDALTDPSHR	Eukaryota	Metazoa			Chordata	Craniata	Actinopterygii	Actinopteri	Neopterygii	Teleostei	Cypriniphysae	Cypriniformes				Cyprinoidea	Cyprinidae				Danio				Danio rerio
NPELQSLLLDSFFSK	Eukaryota	Metazoa			Chordata	Craniata	Actinopterygii	Actinopteri	Neopterygii	Teleostei	Cypriniphysae	Cypriniformes				Cyprinoidea	Cyprinidae				Danio				Danio rerio
NPEYLQFISILEETR	Eukaryota	Metazoa			Chordata	Craniata	Actinopterygii	Actinopteri	Neopterygii	Teleostei	Cypriniphysae	Cypriniformes				Cyprinoidea	Cyprinidae				Danio				Danio rerio
NQLWEYNQSGPAIHQELQELGGLK	Eukaryota	Metazoa			Chordata	Craniata	Actinopterygii	Actinopteri	Neopterygii	Teleostei	Cypriniphysae	Cypriniformes				Cyprinoidea	Cyprinidae				Danio				Danio rerio
NSIIGNSQEAYK	Eukaryota	Metazoa			Chordata	Craniata	Actinopterygii	Actinopteri	Neopterygii	Teleostei	Cypriniphysae	Cypriniformes				Cyprinoidea	Cyprinidae				Danio				Danio rerio
NSITIVWTKPEYDGGSK	Eukaryota	Metazoa			Chordata	Craniata	Actinopterygii	Actinopteri	Neopterygii	Teleostei	Cypriniphysae	Cypriniformes				Cyprinoidea	Cyprinidae				Danio				Danio rerio
NSPLVSELSLFDIAHTPGVAADLSHIETR	Eukaryota	Metazoa			Chordata	Craniata	Actinopterygii	Actinopteri	Neopterygii	Teleostei	Cypriniphysae	Cypriniformes				Cyprinoidea	Cyprinidae				Danio				Danio rerio
NSTLFYIIGHHSVR	Eukaryota	Metazoa			Chordata	Craniata	Actinopterygii	Actinopteri	Neopterygii	Teleostei	Cypriniphysae	Cypriniformes				Cyprinoidea	Cyprinidae				Danio				Danio rerio
NVPEASLIGLAK	Eukaryota	Metazoa			Chordata	Craniata	Actinopterygii	Actinopteri	Neopterygii	Teleostei	Cypriniphysae	Cypriniformes				Cyprinoidea	Cyprinidae				Danio				Danio rerio
NYLDLSATNNHFIDEYAR	Eukaryota	Metazoa			Chordata	Craniata	Actinopterygii	Actinopteri	Neopterygii	Teleostei	Cypriniphysae	Cypriniformes				Cyprinoidea	Cyprinidae				Danio				Danio rerio
QDYQLVGIIDGYLSLMK	Eukaryota	Metazoa			Chordata	Craniata	Actinopterygii	Actinopteri	Neopterygii	Teleostei	Cypriniphysae	Cypriniformes				Cyprinoidea	Cyprinidae				Danio				Danio rerio
QETALIEILLCTIR	Eukaryota	Metazoa			Chordata	Craniata	Actinopterygii	Actinopteri	Neopterygii	Teleostei	Cypriniphysae	Cypriniformes				Cyprinoidea	Cyprinidae				Danio				Danio rerio
QHPDTVPFTAIDDHPLQLQAK	Eukaryota	Metazoa			Chordata	Craniata	Actinopterygii	Actinopteri	Neopterygii	Teleostei	Cypriniphysae	Cypriniformes				Cyprinoidea	Cyprinidae				Danio				Danio rerio
QIDDILSVASIKPTVLQVESHPYLAQVELLSHCR	Eukaryota	Metazoa			Chordata	Craniata	Actinopterygii	Actinopteri	Neopterygii	Teleostei	Cypriniphysae	Cypriniformes				Cyprinoidea	Cyprinidae				Danio				Danio rerio
QIGVQHVVVYINK	Eukaryota	Metazoa			Chordata	Craniata	Actinopterygii	Actinopteri	Neopterygii	Teleostei	Cypriniphysae	Cypriniformes				Cyprinoidea	Cyprinidae				Danio				Danio rerio
QLHLTELVLELAAQVLEEK	Eukaryota	Metazoa			Chordata	Craniata	Actinopterygii	Actinopteri	Neopterygii	Teleostei	Cypriniphysae	Cypriniformes				Cyprinoidea	Cyprinidae				Danio				Danio rerio
QQGHHIGALSIK	Eukaryota	Metazoa			Chordata	Craniata	Actinopterygii	Actinopteri	Neopterygii	Teleostei	Cypriniphysae	Cypriniformes				Cyprinoidea	Cyprinidae				Danio				Danio rerio
QQLVSAHLDSLLGPDAHINLTDPDGALAK	Eukaryota	Metazoa			Chordata	Craniata	Actinopterygii	Actinopteri	Neopterygii	Teleostei	Cypriniphysae	Cypriniformes				Cyprinoidea	Cyprinidae				Danio				Danio rerio
QSDFLAICCALTPETHGICNWNLFSK	Eukaryota	Metazoa			Chordata	Craniata	Actinopterygii	Actinopteri	Neopterygii	Teleostei	Cypriniphysae	Cypriniformes				Cyprinoidea	Cyprinidae				Danio				Danio rerio
QSLILLPFKPELK	Eukaryota	Metazoa			Chordata	Craniata	Actinopterygii	Actinopteri	Neopterygii	Teleostei	Cypriniphysae	Cypriniformes				Cyprinoidea	Cyprinidae				Danio				Danio rerio
QSVGDCK	Eukaryota	Metazoa			Chordata	Craniata	Actinopterygii	Actinopteri	Neopterygii	Teleostei	Cypriniphysae	Cypriniformes				Cyprinoidea	Cyprinidae				Danio				Danio rerio
QTVVNSCGTVGLVHAVANNQDSIDFDNNSALK	Eukaryota	Metazoa			Chordata	Craniata	Actinopterygii	Actinopteri	Neopterygii	Teleostei	Cypriniphysae	Cypriniformes				Cyprinoidea	Cyprinidae				Danio				Danio rerio
QVVMAILEAMNSVIK	Eukaryota	Metazoa			Chordata	Craniata	Actinopterygii	Actinopteri	Neopterygii	Teleostei	Cypriniphysae	Cypriniformes				Cyprinoidea	Cyprinidae				Danio				Danio rerio
SAEISVIVLDKPGPPGAIK	Eukaryota	Metazoa			Chordata	Craniata	Actinopterygii	Actinopteri	Neopterygii	Teleostei	Cypriniphysae	Cypriniformes				Cyprinoidea	Cyprinidae				Danio				Danio rerio
SAILSQAPFTFR	Eukaryota	Metazoa			Chordata	Craniata	Actinopterygii	Actinopteri	Neopterygii	Teleostei	Cypriniphysae	Cypriniformes				Cyprinoidea	Cyprinidae				Danio				Danio rerio
SCDFNVHQLITHLLR	Eukaryota	Metazoa			Chordata	Craniata	Actinopterygii	Actinopteri	Neopterygii	Teleostei	Cypriniphysae	Cypriniformes				Cyprinoidea	Cyprinidae				Danio				Danio rerio
SEFEALCEDLFDR	Eukaryota	Metazoa			Chordata	Craniata	Actinopterygii	Actinopteri	Neopterygii	Teleostei	Cypriniphysae	Cypriniformes				Cyprinoidea	Cyprinidae				Danio				Danio rerio
SELTGHFEELVLAMLK	Eukaryota	Metazoa			Chordata	Craniata	Actinopterygii	Actinopteri	Neopterygii	Teleostei	Cypriniphysae	Cypriniformes				Cyprinoidea	Cyprinidae				Danio				Danio rerio
SFLTVAEELFR	Eukaryota	Metazoa			Chordata	Craniata	Actinopterygii	Actinopteri	Neopterygii	Teleostei	Cypriniphysae	Cypriniformes				Cyprinoidea	Cyprinidae				Danio				Danio rerio
SFTNIHNDIFYWVLPQNFR	Eukaryota	Metazoa			Chordata	Craniata	Actinopterygii	Actinopteri	Neopterygii	Teleostei	Cypriniphysae	Cypriniformes				Cyprinoidea	Cyprinidae				Danio				Danio rerio
SGHYNLSPSIFFCATPPDDGNLCR	Eukaryota	Metazoa			Chordata	Craniata	Actinopterygii	Actinopteri	Neopterygii	Teleostei	Cypriniphysae	Cypriniformes				Cyprinoidea	Cyprinidae				Danio				Danio rerio
SGVYQHMSGSALGGHAIK	Eukaryota	Metazoa			Chordata	Craniata	Actinopterygii	Actinopteri	Neopterygii	Teleostei	Cypriniphysae	Cypriniformes				Cyprinoidea	Cyprinidae				Danio				Danio rerio
SLIDTLQPIIAEHQEK	Eukaryota	Metazoa			Chordata	Craniata	Actinopterygii	Actinopteri	Neopterygii	Teleostei	Cypriniphysae	Cypriniformes				Cyprinoidea	Cyprinidae				Danio				Danio rerio
SLLLQIAHGLLEEEAAAAEEEK	Eukaryota	Metazoa			Chordata	Craniata	Actinopterygii	Actinopteri	Neopterygii	Teleostei	Cypriniphysae	Cypriniformes				Cyprinoidea	Cyprinidae				Danio				Danio rerio
SLQDDPLLVHYMNVAK	Eukaryota	Metazoa			Chordata	Craniata	Actinopterygii	Actinopteri	Neopterygii	Teleostei	Cypriniphysae	Cypriniformes				Cyprinoidea	Cyprinidae				Danio				Danio rerio
SIQHLSSMLAGHSSDSETSEPNQQELLSSVQQNPCSPVQQSEAVSQLR	Eukaryota	Metazoa			Chordata	Craniata	Actinopterygii	Actinopteri	Neopterygii	Teleostei	Cypriniphysae	Cypriniformes				Cyprinoidea	Cyprinidae				Danio				Danio rerio
SIQLDGLVWGQSK	Eukaryota	Metazoa			Chordata	Craniata	Actinopterygii	Actinopteri	Neopterygii	Teleostei	Cypriniphysae	Cypriniformes				Cyprinoidea	Cyprinidae				Danio				Danio rerio
SQEPVSLDQWHR	Eukaryota	Metazoa			Chordata	Craniata	Actinopterygii	Actinopteri	Neopterygii	Teleostei	Cypriniphysae	Cypriniformes				Cyprinoidea	Cyprinidae				Danio				Danio rerio
SQESEHYLAFQEAAEQFQPFIK	Eukaryota	Metazoa			Chordata	Craniata	Actinopterygii	Actinopteri	Neopterygii	Teleostei	Cypriniphysae	Cypriniformes				Cyprinoidea	Cyprinidae				Danio				Danio rerio
SSVSLSWTKPEYDGGAK	Eukaryota	Metazoa			Chordata	Craniata	Actinopterygii	Actinopteri	Neopterygii	Teleostei	Cypriniphysae	Cypriniformes				Cyprinoidea	Cyprinidae				Danio				Danio rerio
SSVTLTWVKPAHDGGSK	Eukaryota	Metazoa			Chordata	Craniata	Actinopterygii	Actinopteri	Neopterygii	Teleostei	Cypriniphysae	Cypriniformes				Cyprinoidea	Cyprinidae				Danio				Danio rerio
STFPELVLACDVCLCPYTSHGHCGILR	Eukaryota	Metazoa			Chordata	Craniata	Actinopterygii	Actinopteri	Neopterygii	Teleostei	Cypriniphysae	Cypriniformes				Cyprinoidea	Cyprinidae				Danio				Danio rerio
STVTLQWTEPQYDGGHR	Eukaryota	Metazoa			Chordata	Craniata	Actinopterygii	Actinopteri	Neopterygii	Teleostei	Cypriniphysae	Cypriniformes				Cyprinoidea	Cyprinidae				Danio				Danio rerio
TAADLAVVLFETATLR	Eukaryota	Metazoa			Chordata	Craniata	Actinopterygii	Actinopteri	Neopterygii	Teleostei	Cypriniphysae	Cypriniformes				Cyprinoidea	Cyprinidae				Danio				Danio rerio
TACYVVDDK	Eukaryota	Metazoa			Chordata	Craniata	Actinopterygii	Actinopteri	Neopterygii	Teleostei	Cypriniphysae	Cypriniformes				Cyprinoidea	Cyprinidae				Danio				Danio rerio
TAFQNIEQSELGTK	Eukaryota	Metazoa			Chordata	Craniata	Actinopterygii	Actinopteri	Neopterygii	Teleostei	Cypriniphysae	Cypriniformes				Cyprinoidea	Cyprinidae				Danio				Danio rerio
TCYLGLPSLPCLHSFPLR	Eukaryota	Metazoa			Chordata	Craniata	Actinopterygii	Actinopteri	Neopterygii	Teleostei	Cypriniphysae	Cypriniformes				Cyprinoidea	Cyprinidae				Danio				Danio rerio
TDSLLYLK	Eukaryota	Metazoa			Chordata	Craniata	Actinopterygii	Actinopteri	Neopterygii	Teleostei	Cypriniphysae	Cypriniformes				Cyprinoidea	Cyprinidae				Danio				Danio rerio
TEPNMHVSSFAYSHIK	Eukaryota	Metazoa			Chordata	Craniata	Actinopterygii	Actinopteri	Neopterygii	Teleostei	Cypriniphysae	Cypriniformes				Cyprinoidea	Cyprinidae				Danio				Danio rerio
TEVWLQWEWPDR	Eukaryota	Metazoa			Chordata	Craniata	Actinopterygii	Actinopteri	Neopterygii	Teleostei	Cypriniphysae	Cypriniformes				Cyprinoidea	Cyprinidae				Danio				Danio rerio
TGLELASIENIWSVYDTLFCEAQHGK	Eukaryota	Metazoa			Chordata	Craniata	Actinopterygii	Actinopteri	Neopterygii	Teleostei	Cypriniphysae	Cypriniformes				Cyprinoidea	Cyprinidae				Danio				Danio rerio
TGLHLNEDILNLMVVR	Eukaryota	Metazoa			Chordata	Craniata	Actinopterygii	Actinopteri	Neopterygii	Teleostei	Cypriniphysae	Cypriniformes				Cyprinoidea	Cyprinidae				Danio				Danio rerio
THDDIEAQILEIQGK	Eukaryota	Metazoa			Chordata	Craniata	Actinopterygii	Actinopteri	Neopterygii	Teleostei	Cypriniphysae	Cypriniformes				Cyprinoidea	Cyprinidae				Danio				Danio rerio
THHSAAEYNVFEGMELR	Eukaryota	Metazoa			Chordata	Craniata	Actinopterygii	Actinopteri	Neopterygii	Teleostei	Cypriniphysae	Cypriniformes				Cyprinoidea	Cyprinidae				Danio				Danio rerio
TIIEEAIPMVAGPKPR	Eukaryota	Metazoa			Chordata	Craniata	Actinopterygii	Actinopteri	Neopterygii	Teleostei	Cypriniphysae	Cypriniformes				Cyprinoidea	Cyprinidae				Danio				Danio rerio
TLIEILTQR	Eukaryota	Metazoa			Chordata	Craniata	Actinopterygii	Actinopteri	Neopterygii	Teleostei	Cypriniphysae	Cypriniformes				Cyprinoidea	Cyprinidae				Danio				Danio rerio
TLITAAELVPAVLEVLPSLR	Eukaryota	Metazoa			Chordata	Craniata	Actinopterygii	Actinopteri	Neopterygii	Teleostei	Cypriniphysae	Cypriniformes				Cyprinoidea	Cyprinidae				Danio				Danio rerio
TITDYIEQQFEQYFR	Eukaryota	Metazoa			Chordata	Craniata	Actinopterygii	Actinopteri	Neopterygii	Teleostei	Cypriniphysae	Cypriniformes				Cyprinoidea	Cyprinidae				Danio				Danio rerio
TLYDHVDEVTCLSFHPTEQILASGSR	Eukaryota	Metazoa			Chordata	Craniata	Actinopterygii	Actinopteri	Neopterygii	Teleostei	Cypriniphysae	Cypriniformes				Cyprinoidea	Cyprinidae				Danio				Danio rerio
TMAATEIAR	Eukaryota	Metazoa			Chordata	Craniata	Actinopterygii	Actinopteri	Neopterygii	Teleostei	Cypriniphysae	Cypriniformes				Cyprinoidea	Cyprinidae				Danio				Danio rerio
TPLHDGGAEVSHYIVER	Eukaryota	Metazoa			Chordata	Craniata	Actinopterygii	Actinopteri	Neopterygii	Teleostei	Cypriniphysae	Cypriniformes				Cyprinoidea	Cyprinidae				Danio				Danio rerio
TQNIYELQEAGAQGVCK	Eukaryota	Metazoa			Chordata	Craniata	Actinopterygii	Actinopteri	Neopterygii	Teleostei	Cypriniphysae	Cypriniformes				Cyprinoidea	Cyprinidae				Danio				Danio rerio
TSVHGALCDNIDTR	Eukaryota	Metazoa			Chordata	Craniata	Actinopterygii	Actinopteri	Neopterygii	Teleostei	Cypriniphysae	Cypriniformes				Cyprinoidea	Cyprinidae				Danio				Danio rerio
TVEGIWHTGIVAYGEEFFFGGGGVTSCYPGCTILGMPDSTVDLGNTEVPR	Eukaryota	Metazoa			Chordata	Craniata	Actinopterygii	Actinopteri	Neopterygii	Teleostei	Cypriniphysae	Cypriniformes				Cyprinoidea	Cyprinidae				Danio				Danio rerio
TVLQIDWNIPAAHDGVNR	Eukaryota	Metazoa			Chordata	Craniata	Actinopterygii	Actinopteri	Neopterygii	Teleostei	Cypriniphysae	Cypriniformes				Cyprinoidea	Cyprinidae				Danio				Danio rerio
TVVSGLVAYITEEQLQDR	Eukaryota	Metazoa			Chordata	Craniata	Actinopterygii	Actinopteri	Neopterygii	Teleostei	Cypriniphysae	Cypriniformes				Cyprinoidea	Cyprinidae				Danio				Danio rerio
TYEPHEDPGVLSVTK	Eukaryota	Metazoa			Chordata	Craniata	Actinopterygii	Actinopteri	Neopterygii	Teleostei	Cypriniphysae	Cypriniformes				Cyprinoidea	Cyprinidae				Danio				Danio rerio
TYLAGAAADVIEFGVR	Eukaryota	Metazoa			Chordata	Craniata	Actinopterygii	Actinopteri	Neopterygii	Teleostei	Cypriniphysae	Cypriniformes				Cyprinoidea	Cyprinidae				Danio				Danio rerio
TYNDDNNHYVAVYR	Eukaryota	Metazoa			Chordata	Craniata	Actinopterygii	Actinopteri	Neopterygii	Teleostei	Cypriniphysae	Cypriniformes				Cyprinoidea	Cyprinidae				Danio				Danio rerio
VACLQVIIIPCGITATLPEAEK	Eukaryota	Metazoa			Chordata	Craniata	Actinopterygii	Actinopteri	Neopterygii	Teleostei	Cypriniphysae	Cypriniformes				Cyprinoidea	Cyprinidae				Danio				Danio rerio
VAFIAFGPHEGK	Eukaryota	Metazoa			Chordata	Craniata	Actinopterygii	Actinopteri	Neopterygii	Teleostei	Cypriniphysae	Cypriniformes				Cyprinoidea	Cyprinidae				Danio				Danio rerio
VAHDEEEGEEVPTYDSYR	Eukaryota	Metazoa			Chordata	Craniata	Actinopterygii	Actinopteri	Neopterygii	Teleostei	Cypriniphysae	Cypriniformes				Cyprinoidea	Cyprinidae				Danio				Danio rerio
VCLIQGTVEALNNVHDFIAEK	Eukaryota	Metazoa			Chordata	Craniata	Actinopterygii	Actinopteri	Neopterygii	Teleostei	Cypriniphysae	Cypriniformes				Cyprinoidea	Cyprinidae				Danio				Danio rerio
VDALPVELPEHIASASFETYAVVR	Eukaryota	Metazoa			Chordata	Craniata	Actinopterygii	Actinopteri	Neopterygii	Teleostei	Cypriniphysae	Cypriniformes				Cyprinoidea	Cyprinidae				Danio				Danio rerio
VDVDDAQDVAALCGISCMPTFHFYK	Eukaryota	Metazoa			Chordata	Craniata	Actinopterygii	Actinopteri	Neopterygii	Teleostei	Cypriniphysae	Cypriniformes				Cyprinoidea	Cyprinidae				Danio				Danio rerio
VEQADLIIFQYPLYWFTIPAIMK	Eukaryota	Metazoa			Chordata	Craniata	Actinopterygii	Actinopteri	Neopterygii	Teleostei	Cypriniphysae	Cypriniformes				Cyprinoidea	Cyprinidae				Danio				Danio rerio
VEYTAYEDGVHLIEVLYDDVPVPK	Eukaryota	Metazoa			Chordata	Craniata	Actinopterygii	Actinopteri	Neopterygii	Teleostei	Cypriniphysae	Cypriniformes				Cyprinoidea	Cyprinidae				Danio				Danio rerio
VFIAVPAGSTGLCIVNDELFVR	Eukaryota	Metazoa			Chordata	Craniata	Actinopterygii	Actinopteri	Neopterygii	Teleostei	Cypriniphysae	Cypriniformes				Cyprinoidea	Cyprinidae				Danio				Danio rerio
VGSHITGGDIYGNVFENSLIK	Eukaryota	Metazoa			Chordata	Craniata	Actinopterygii	Actinopteri	Neopterygii	Teleostei	Cypriniphysae	Cypriniformes				Cyprinoidea	Cyprinidae				Danio				Danio rerio
VGVPSDSVK	Eukaryota	Metazoa			Chordata	Craniata	Actinopterygii	Actinopteri	Neopterygii	Teleostei	Cypriniphysae	Cypriniformes				Cyprinoidea	Cyprinidae				Danio				Danio rerio
VHGALAQSVVLPCR	Eukaryota	Metazoa			Chordata	Craniata	Actinopterygii	Actinopteri	Neopterygii	Teleostei	Cypriniphysae	Cypriniformes				Cyprinoidea	Cyprinidae				Danio				Danio rerio
VLAENEHGVGLPADIADPLK	Eukaryota	Metazoa			Chordata	Craniata	Actinopterygii	Actinopteri	Neopterygii	Teleostei	Cypriniphysae	Cypriniformes				Cyprinoidea	Cyprinidae				Danio				Danio rerio
VNAVQFMNLVNSVLEK	Eukaryota	Metazoa			Chordata	Craniata	Actinopterygii	Actinopteri	Neopterygii	Teleostei	Cypriniphysae	Cypriniformes				Cyprinoidea	Cyprinidae				Danio				Danio rerio
VNLTGTINLLEVMQSHGVR	Eukaryota	Metazoa			Chordata	Craniata	Actinopterygii	Actinopteri	Neopterygii	Teleostei	Cypriniphysae	Cypriniformes				Cyprinoidea	Cyprinidae				Danio				Danio rerio
VSDNLAVQLK	Eukaryota	Metazoa			Chordata	Craniata	Actinopterygii	Actinopteri	Neopterygii	Teleostei	Cypriniphysae	Cypriniformes				Cyprinoidea	Cyprinidae				Danio				Danio rerio
VSIIEELVVGFETSLR	Eukaryota	Metazoa			Chordata	Craniata	Actinopterygii	Actinopteri	Neopterygii	Teleostei	Cypriniphysae	Cypriniformes				Cyprinoidea	Cyprinidae				Danio				Danio rerio
VSYGEHHWHAEPQCFQCAGCSK	Eukaryota	Metazoa			Chordata	Craniata	Actinopterygii	Actinopteri	Neopterygii	Teleostei	Cypriniphysae	Cypriniformes				Cyprinoidea	Cyprinidae				Danio				Danio rerio
VTIPIFNMR	Eukaryota	Metazoa			Chordata	Craniata	Actinopterygii	Actinopteri	Neopterygii	Teleostei	Cypriniphysae	Cypriniformes				Cyprinoidea	Cyprinidae				Danio				Danio rerio
VTLSWNPPENDGCSEVTHYILEK	Eukaryota	Metazoa			Chordata	Craniata	Actinopterygii	Actinopteri	Neopterygii	Teleostei	Cypriniphysae	Cypriniformes				Cyprinoidea	Cyprinidae				Danio				Danio rerio
VTPEGEFLPLDNSDLNVGFDTGTDR	Eukaryota	Metazoa			Chordata	Craniata	Actinopterygii	Actinopteri	Neopterygii	Teleostei	Cypriniphysae	Cypriniformes				Cyprinoidea	Cyprinidae				Danio				Danio rerio
VTVQALSGLK	Eukaryota	Metazoa			Chordata	Craniata	Actinopterygii	Actinopteri	Neopterygii	Teleostei	Cypriniphysae	Cypriniformes				Cyprinoidea	Cyprinidae				Danio				Danio rerio
VVEFIHQGIQIGQDVK	Eukaryota	Metazoa			Chordata	Craniata	Actinopterygii	Actinopteri	Neopterygii	Teleostei	Cypriniphysae	Cypriniformes				Cyprinoidea	Cyprinidae				Danio				Danio rerio
VYLIYEGYQGLVDGGDHIK	Eukaryota	Metazoa			Chordata	Craniata	Actinopterygii	Actinopteri	Neopterygii	Teleostei	Cypriniphysae	Cypriniformes				Cyprinoidea	Cyprinidae				Danio				Danio rerio
WTPFDFLSGLVK	Eukaryota	Metazoa			Chordata	Craniata	Actinopterygii	Actinopteri	Neopterygii	Teleostei	Cypriniphysae	Cypriniformes				Cyprinoidea	Cyprinidae				Danio				Danio rerio
WVIDGEEIK	Eukaryota	Metazoa			Chordata	Craniata	Actinopterygii	Actinopteri	Neopterygii	Teleostei	Cypriniphysae	Cypriniformes				Cyprinoidea	Cyprinidae				Danio				Danio rerio
YALDNHFQTSSGSR	Eukaryota	Metazoa			Chordata	Craniata	Actinopterygii	Actinopteri	Neopterygii	Teleostei	Cypriniphysae	Cypriniformes				Cyprinoidea	Cyprinidae				Danio				Danio rerio
YANQEYAIDFDSFVSCLIR	Eukaryota	Metazoa			Chordata	Craniata	Actinopterygii	Actinopteri	Neopterygii	Teleostei	Cypriniphysae	Cypriniformes				Cyprinoidea	Cyprinidae				Danio				Danio rerio
YEPFSFPDDLGSNNSGYYELQAVLTHQGR	Eukaryota	Metazoa			Chordata	Craniata	Actinopterygii	Actinopteri	Neopterygii	Teleostei	Cypriniphysae	Cypriniformes				Cyprinoidea	Cyprinidae				Danio				Danio rerio
YEQTGNQDLAEALSR	Eukaryota	Metazoa			Chordata	Craniata	Actinopterygii	Actinopteri	Neopterygii	Teleostei	Cypriniphysae	Cypriniformes				Cyprinoidea	Cyprinidae				Danio				Danio rerio
YFQETEAPRPADFLSK	Eukaryota	Metazoa			Chordata	Craniata	Actinopterygii	Actinopteri	Neopterygii	Teleostei	Cypriniphysae	Cypriniformes				Cyprinoidea	Cyprinidae				Danio				Danio rerio
YGAVWTGDNAADWGHLK	Eukaryota	Metazoa			Chordata	Craniata	Actinopterygii	Actinopteri	Neopterygii	Teleostei	Cypriniphysae	Cypriniformes				Cyprinoidea	Cyprinidae				Danio				Danio rerio
YGIICLEDLIHEIYSAGK	Eukaryota	Metazoa			Chordata	Craniata	Actinopterygii	Actinopteri	Neopterygii	Teleostei	Cypriniphysae	Cypriniformes				Cyprinoidea	Cyprinidae				Danio				Danio rerio
YITELTVSSKPHQVK	Eukaryota	Metazoa			Chordata	Craniata	Actinopterygii	Actinopteri	Neopterygii	Teleostei	Cypriniphysae	Cypriniformes				Cyprinoidea	Cyprinidae				Danio				Danio rerio
YMDAFKPFLIIGLK	Eukaryota	Metazoa			Chordata	Craniata	Actinopterygii	Actinopteri	Neopterygii	Teleostei	Cypriniphysae	Cypriniformes				Cyprinoidea	Cyprinidae				Danio				Danio rerio
YSDSTLVHINTVIK	Eukaryota	Metazoa			Chordata	Craniata	Actinopterygii	Actinopteri	Neopterygii	Teleostei	Cypriniphysae	Cypriniformes				Cyprinoidea	Cyprinidae				Danio				Danio rerio
YSSFDETGFPTHDAEGK	Eukaryota	Metazoa			Chordata	Craniata	Actinopterygii	Actinopteri	Neopterygii	Teleostei	Cypriniphysae	Cypriniformes				Cyprinoidea	Cyprinidae				Danio				Danio rerio
YTLTLDNTFFR	Eukaryota	Metazoa			Chordata	Craniata	Actinopterygii	Actinopteri	Neopterygii	Teleostei	Cypriniphysae	Cypriniformes				Cyprinoidea	Cyprinidae				Danio				Danio rerio
YTSSGPLLAMVWEGLNVIK	Eukaryota	Metazoa			Chordata	Craniata	Actinopterygii	Actinopteri	Neopterygii	Teleostei	Cypriniphysae	Cypriniformes				Cyprinoidea	Cyprinidae				Danio				Danio rerio
AAAQIGITAVHIK	Eukaryota	Metazoa			Chordata	Craniata	Actinopterygii	Actinopteri	Neopterygii	Teleostei	Cypriniphysae	Cypriniformes				Cyprinoidea	Cyprinidae				Danio				Danio rerio
ACNELGITLVHTNIR	Eukaryota	Metazoa			Chordata	Craniata	Actinopterygii	Actinopteri	Neopterygii	Teleostei	Cypriniphysae	Cypriniformes				Cyprinoidea	Cyprinidae				Danio				Danio rerio
AENHYGTGDAIISEPVVAR	Eukaryota	Metazoa			Chordata	Craniata	Actinopterygii	Actinopteri	Neopterygii	Teleostei	Cypriniphysae	Cypriniformes				Cyprinoidea	Cyprinidae				Danio				Danio rerio
AFAEFLTEEIK	Eukaryota	Metazoa			Chordata	Craniata	Actinopterygii	Actinopteri	Neopterygii	Teleostei	Cypriniphysae	Cypriniformes				Cyprinoidea	Cyprinidae				Danio				Danio rerio
AFHMDYYYTPLMIGAAGSAYMINDAATILPR	Eukaryota	Metazoa			Chordata	Craniata	Actinopterygii	Actinopteri	Neopterygii	Teleostei	Cypriniphysae	Cypriniformes				Cyprinoidea	Cyprinidae				Danio				Danio rerio
AFQLDFYHTPLMIGAAGSAYMINDAATILPR	Eukaryota	Metazoa			Chordata	Craniata	Actinopterygii	Actinopteri	Neopterygii	Teleostei	Cypriniphysae	Cypriniformes				Cyprinoidea	Cyprinidae				Danio				Danio rerio
AGGPLGLSIVGGSDHASHPFGINEPGVFISK	Eukaryota	Metazoa			Chordata	Craniata	Actinopterygii	Actinopteri	Neopterygii	Teleostei	Cypriniphysae	Cypriniformes				Cyprinoidea	Cyprinidae				Danio				Danio rerio
AGQIINLVTR	Eukaryota	Metazoa			Chordata	Craniata	Actinopterygii	Actinopteri	Neopterygii	Teleostei	Cypriniphysae	Cypriniformes				Cyprinoidea	Cyprinidae				Danio				Danio rerio
ALFDLLVPLR	Eukaryota	Metazoa			Chordata	Craniata	Actinopterygii	Actinopteri	Neopterygii	Teleostei	Cypriniphysae	Cypriniformes				Cyprinoidea	Cyprinidae				Danio				Danio rerio
AIGGVIDVIGNIDPNQFVPSEPPPPR	Eukaryota	Metazoa			Chordata	Craniata	Actinopterygii	Actinopteri	Neopterygii	Teleostei	Cypriniphysae	Cypriniformes				Cyprinoidea	Cyprinidae				Danio				Danio rerio
ALGTPGTWEHITEQIGMFSFTGLNPK	Eukaryota	Metazoa			Chordata	Craniata	Actinopterygii	Actinopteri	Neopterygii	Teleostei	Cypriniphysae	Cypriniformes				Cyprinoidea	Cyprinidae				Danio				Danio rerio
ALPTDKPLASAYVK	Eukaryota	Metazoa			Chordata	Craniata	Actinopterygii	Actinopteri	Neopterygii	Teleostei	Cypriniphysae	Cypriniformes				Cyprinoidea	Cyprinidae				Danio				Danio rerio
ALPTDRPLASAYVK	Eukaryota	Metazoa			Chordata	Craniata	Actinopterygii	Actinopteri	Neopterygii	Teleostei	Cypriniphysae	Cypriniformes				Cyprinoidea	Cyprinidae				Danio				Danio rerio
ANLLLLSPEHEGQCPLR	Eukaryota	Metazoa			Chordata	Craniata	Actinopterygii	Actinopteri	Neopterygii	Teleostei	Cypriniphysae	Cypriniformes				Cyprinoidea	Cyprinidae				Danio				Danio rerio
ANNVDAIHPGYGFLSER	Eukaryota	Metazoa			Chordata	Craniata	Actinopterygii	Actinopteri	Neopterygii	Teleostei	Cypriniphysae	Cypriniformes				Cyprinoidea	Cyprinidae				Danio				Danio rerio
APEPISLHLAELTASQFLDIWNK	Eukaryota	Metazoa			Chordata	Craniata	Actinopterygii	Actinopteri	Neopterygii	Teleostei	Cypriniphysae	Cypriniformes				Cyprinoidea	Cyprinidae				Danio				Danio rerio
AQVDEFLSWQHTNIR	Eukaryota	Metazoa			Chordata	Craniata	Actinopterygii	Actinopteri	Neopterygii	Teleostei	Cypriniphysae	Cypriniformes				Cyprinoidea	Cyprinidae				Danio				Danio rerio
ASGDVGSTITIMHISNHNSVNNSSLITMMTAHNIR	Eukaryota	Metazoa			Chordata	Craniata	Actinopterygii	Actinopteri	Neopterygii	Teleostei	Cypriniphysae	Cypriniformes				Cyprinoidea	Cyprinidae				Danio				Danio rerio
ASHSVQDIVLNLFVQK	Eukaryota	Metazoa			Chordata	Craniata	Actinopterygii	Actinopteri	Neopterygii	Teleostei	Cypriniphysae	Cypriniformes				Cyprinoidea	Cyprinidae				Danio				Danio rerio
AVDLVLNNAQLIPVLGNLR	Eukaryota	Metazoa			Chordata	Craniata	Actinopterygii	Actinopteri	Neopterygii	Teleostei	Cypriniphysae	Cypriniformes				Cyprinoidea	Cyprinidae				Danio				Danio rerio
AVEGLETMVASAGLVKPGVVK	Eukaryota	Metazoa			Chordata	Craniata	Actinopterygii	Actinopteri	Neopterygii	Teleostei	Cypriniphysae	Cypriniformes				Cyprinoidea	Cyprinidae				Danio				Danio rerio
AVIAELVSVAELAHPLENGNHFPLFLLCLQQASK	Eukaryota	Metazoa			Chordata	Craniata	Actinopterygii	Actinopteri	Neopterygii	Teleostei	Cypriniphysae	Cypriniformes				Cyprinoidea	Cyprinidae				Danio				Danio rerio
AVMFCLSDDK	Eukaryota	Metazoa			Chordata	Craniata	Actinopterygii	Actinopteri	Neopterygii	Teleostei	Cypriniphysae	Cypriniformes				Cyprinoidea	Cyprinidae				Danio				Danio rerio
AVVPNVYLDDDTIYHLQPSGR	Eukaryota	Metazoa			Chordata	Craniata	Actinopterygii	Actinopteri	Neopterygii	Teleostei	Cypriniphysae	Cypriniformes				Cyprinoidea	Cyprinidae				Danio				Danio rerio
AYLAGAAADVIEFGVR	Eukaryota	Metazoa			Chordata	Craniata	Actinopterygii	Actinopteri	Neopterygii	Teleostei	Cypriniphysae	Cypriniformes				Cyprinoidea	Cyprinidae				Danio				Danio rerio
CEAFGFNTYVVDGHDVEELCK	Eukaryota	Metazoa			Chordata	Craniata	Actinopterygii	Actinopteri	Neopterygii	Teleostei	Cypriniphysae	Cypriniformes				Cyprinoidea	Cyprinidae				Danio				Danio rerio
CFLDHFESLEK	Eukaryota	Metazoa			Chordata	Craniata	Actinopterygii	Actinopteri	Neopterygii	Teleostei	Cypriniphysae	Cypriniformes				Cyprinoidea	Cyprinidae				Danio				Danio rerio
CHEEIVQVLGYDR	Eukaryota	Metazoa			Chordata	Craniata	Actinopterygii	Actinopteri	Neopterygii	Teleostei	Cypriniphysae	Cypriniformes				Cyprinoidea	Cyprinidae				Danio				Danio rerio
CLEDLQHFIAELDEVVR	Eukaryota	Metazoa			Chordata	Craniata	Actinopterygii	Actinopteri	Neopterygii	Teleostei	Cypriniphysae	Cypriniformes				Cyprinoidea	Cyprinidae				Danio				Danio rerio
DAPAQIVEVLK	Eukaryota	Metazoa			Chordata	Craniata	Actinopterygii	Actinopteri	Neopterygii	Teleostei	Cypriniphysae	Cypriniformes				Cyprinoidea	Cyprinidae				Danio				Danio rerio
DAVDAIVEGFGFK	Eukaryota	Metazoa			Chordata	Craniata	Actinopterygii	Actinopteri	Neopterygii	Teleostei	Cypriniphysae	Cypriniformes				Cyprinoidea	Cyprinidae				Danio				Danio rerio
DCAAADSFNYK	Eukaryota	Metazoa			Chordata	Craniata	Actinopterygii	Actinopteri	Neopterygii	Teleostei	Cypriniphysae	Cypriniformes				Cyprinoidea	Cyprinidae				Danio				Danio rerio
DDALSELSGIPECIFVHAGGFIGGNK	Eukaryota	Metazoa			Chordata	Craniata	Actinopterygii	Actinopteri	Neopterygii	Teleostei	Cypriniphysae	Cypriniformes				Cyprinoidea	Cyprinidae				Danio				Danio rerio
DDEHAAVALSSLIR	Eukaryota	Metazoa			Chordata	Craniata	Actinopterygii	Actinopteri	Neopterygii	Teleostei	Cypriniphysae	Cypriniformes				Cyprinoidea	Cyprinidae				Danio				Danio rerio
DDTVTFGLK	Eukaryota	Metazoa			Chordata	Craniata	Actinopterygii	Actinopteri	Neopterygii	Teleostei	Cypriniphysae	Cypriniformes				Cyprinoidea	Cyprinidae				Danio				Danio rerio
DFFHGLGIESIR	Eukaryota	Metazoa			Chordata	Craniata	Actinopterygii	Actinopteri	Neopterygii	Teleostei	Cypriniphysae	Cypriniformes				Cyprinoidea	Cyprinidae				Danio				Danio rerio
DFLSWIHK	Eukaryota	Metazoa			Chordata	Craniata	Actinopterygii	Actinopteri	Neopterygii	Teleostei	Cypriniphysae	Cypriniformes				Cyprinoidea	Cyprinidae				Danio				Danio rerio
DGNGYIDEHELDALLR	Eukaryota	Metazoa			Chordata	Craniata	Actinopterygii	Actinopteri	Neopterygii	Teleostei	Cypriniphysae	Cypriniformes				Cyprinoidea	Cyprinidae				Danio				Danio rerio
DHIDTVMEYLINVTTAPEFR	Eukaryota	Metazoa			Chordata	Craniata	Actinopterygii	Actinopteri	Neopterygii	Teleostei	Cypriniphysae	Cypriniformes				Cyprinoidea	Cyprinidae				Danio				Danio rerio
DHTSPLALITGMQYPLAQLIR	Eukaryota	Metazoa			Chordata	Craniata	Actinopterygii	Actinopteri	Neopterygii	Teleostei	Cypriniphysae	Cypriniformes				Cyprinoidea	Cyprinidae				Danio				Danio rerio
DLGDVSTLADSSVIEHLFENR	Eukaryota	Metazoa			Chordata	Craniata	Actinopterygii	Actinopteri	Neopterygii	Teleostei	Cypriniphysae	Cypriniformes				Cyprinoidea	Cyprinidae				Danio				Danio rerio
DLLNFHILK	Eukaryota	Metazoa			Chordata	Craniata	Actinopterygii	Actinopteri	Neopterygii	Teleostei	Cypriniphysae	Cypriniformes				Cyprinoidea	Cyprinidae				Danio				Danio rerio
DLLTAAVHTILDLHR	Eukaryota	Metazoa			Chordata	Craniata	Actinopterygii	Actinopteri	Neopterygii	Teleostei	Cypriniphysae	Cypriniformes				Cyprinoidea	Cyprinidae				Danio				Danio rerio
DLMQLVSSLAR	Eukaryota	Metazoa			Chordata	Craniata	Actinopterygii	Actinopteri	Neopterygii	Teleostei	Cypriniphysae	Cypriniformes				Cyprinoidea	Cyprinidae				Danio				Danio rerio
DLNLQIEALTEELAYMK	Eukaryota	Metazoa			Chordata	Craniata	Actinopterygii	Actinopteri	Neopterygii	Teleostei	Cypriniphysae	Cypriniformes				Cyprinoidea	Cyprinidae				Danio				Danio rerio
DLSGWCVEQILQHIQR	Eukaryota	Metazoa			Chordata	Craniata	Actinopterygii	Actinopteri	Neopterygii	Teleostei	Cypriniphysae	Cypriniformes				Cyprinoidea	Cyprinidae				Danio				Danio rerio
DIYLPVAVPINPDGTFSIETYEDFLAWIQK	Eukaryota	Metazoa			Chordata	Craniata	Actinopterygii	Actinopteri	Neopterygii	Teleostei	Cypriniphysae	Cypriniformes				Cyprinoidea	Cyprinidae				Danio				Danio rerio
DIYLPVTVPINPDGTFTIDK	Eukaryota	Metazoa			Chordata	Craniata	Actinopterygii	Actinopteri	Neopterygii	Teleostei	Cypriniphysae	Cypriniformes				Cyprinoidea	Cyprinidae				Danio				Danio rerio
DMVHDDAPFK	Eukaryota	Metazoa			Chordata	Craniata	Actinopterygii	Actinopteri	Neopterygii	Teleostei	Cypriniphysae	Cypriniformes				Cyprinoidea	Cyprinidae				Danio				Danio rerio
DNTSDDIGWVTVTSTHK	Eukaryota	Metazoa			Chordata	Craniata	Actinopterygii	Actinopteri	Neopterygii	Teleostei	Cypriniphysae	Cypriniformes				Cyprinoidea	Cyprinidae				Danio				Danio rerio
DPVTHSQLSEFGEYVAEILPK	Eukaryota	Metazoa			Chordata	Craniata	Actinopterygii	Actinopteri	Neopterygii	Teleostei	Cypriniphysae	Cypriniformes				Cyprinoidea	Cyprinidae				Danio				Danio rerio
DQHDTFFISDPALAHEFPR	Eukaryota	Metazoa			Chordata	Craniata	Actinopterygii	Actinopteri	Neopterygii	Teleostei	Cypriniphysae	Cypriniformes				Cyprinoidea	Cyprinidae				Danio				Danio rerio
DQLISLYDSFTK	Eukaryota	Metazoa			Chordata	Craniata	Actinopterygii	Actinopteri	Neopterygii	Teleostei	Cypriniphysae	Cypriniformes				Cyprinoidea	Cyprinidae				Danio				Danio rerio
DTSGENIAESLVAEGLAMVR	Eukaryota	Metazoa			Chordata	Craniata	Actinopterygii	Actinopteri	Neopterygii	Teleostei	Cypriniphysae	Cypriniformes				Cyprinoidea	Cyprinidae				Danio				Danio rerio
DVMDEAGQHNFSK	Eukaryota	Metazoa			Chordata	Craniata	Actinopterygii	Actinopteri	Neopterygii	Teleostei	Cypriniphysae	Cypriniformes				Cyprinoidea	Cyprinidae				Danio				Danio rerio
DYQDPLK	Eukaryota	Metazoa			Chordata	Craniata	Actinopterygii	Actinopteri	Neopterygii	Teleostei	Cypriniphysae	Cypriniformes				Cyprinoidea	Cyprinidae				Danio				Danio rerio
DYSAYYATISDLQAK	Eukaryota	Metazoa			Chordata	Craniata	Actinopterygii	Actinopteri	Neopterygii	Teleostei	Cypriniphysae	Cypriniformes				Cyprinoidea	Cyprinidae				Danio				Danio rerio
DYVDHVDVVDAVEGAVK	Eukaryota	Metazoa			Chordata	Craniata	Actinopterygii	Actinopteri	Neopterygii	Teleostei	Cypriniphysae	Cypriniformes				Cyprinoidea	Cyprinidae				Danio				Danio rerio
EAPNPIHLTVDTALQSNK	Eukaryota	Metazoa			Chordata	Craniata	Actinopterygii	Actinopteri	Neopterygii	Teleostei	Cypriniphysae	Cypriniformes				Cyprinoidea	Cyprinidae				Danio				Danio rerio
EEALVLDSSK	Eukaryota	Metazoa			Chordata	Craniata	Actinopterygii	Actinopteri	Neopterygii	Teleostei	Cypriniphysae	Cypriniformes				Cyprinoidea	Cyprinidae				Danio				Danio rerio
EFEPPNLDLEFR	Eukaryota	Metazoa			Chordata	Craniata	Actinopterygii	Actinopteri	Neopterygii	Teleostei	Cypriniphysae	Cypriniformes				Cyprinoidea	Cyprinidae				Danio				Danio rerio
EGESEWHPANTDLVER	Eukaryota	Metazoa			Chordata	Craniata	Actinopterygii	Actinopteri	Neopterygii	Teleostei	Cypriniphysae	Cypriniformes				Cyprinoidea	Cyprinidae				Danio				Danio rerio
EGGLGEAVLSAVGEEPGIVVHR	Eukaryota	Metazoa			Chordata	Craniata	Actinopterygii	Actinopteri	Neopterygii	Teleostei	Cypriniphysae	Cypriniformes				Cyprinoidea	Cyprinidae				Danio				Danio rerio
EIASEPIADHYFYTADFK	Eukaryota	Metazoa			Chordata	Craniata	Actinopterygii	Actinopteri	Neopterygii	Teleostei	Cypriniphysae	Cypriniformes				Cyprinoidea	Cyprinidae				Danio				Danio rerio
ELLSAELGDIFGK	Eukaryota	Metazoa			Chordata	Craniata	Actinopterygii	Actinopteri	Neopterygii	Teleostei	Cypriniphysae	Cypriniformes				Cyprinoidea	Cyprinidae				Danio				Danio rerio
ELWQAALSSLNPNPTDSCPLYLSHAAVAALPSR	Eukaryota	Metazoa			Chordata	Craniata	Actinopterygii	Actinopteri	Neopterygii	Teleostei	Cypriniphysae	Cypriniformes				Cyprinoidea	Cyprinidae				Danio				Danio rerio
EIYYHGDPIPVNIK	Eukaryota	Metazoa			Chordata	Craniata	Actinopterygii	Actinopteri	Neopterygii	Teleostei	Cypriniphysae	Cypriniformes				Cyprinoidea	Cyprinidae				Danio				Danio rerio
EPLPSLEAIYLITPTDK	Eukaryota	Metazoa			Chordata	Craniata	Actinopterygii	Actinopteri	Neopterygii	Teleostei	Cypriniphysae	Cypriniformes				Cyprinoidea	Cyprinidae				Danio				Danio rerio
ESDHIHIIALAQALNVPVLVEYMDR	Eukaryota	Metazoa			Chordata	Craniata	Actinopterygii	Actinopteri	Neopterygii	Teleostei	Cypriniphysae	Cypriniformes				Cyprinoidea	Cyprinidae				Danio				Danio rerio
ESDLLTAFFNVDYLR	Eukaryota	Metazoa			Chordata	Craniata	Actinopterygii	Actinopteri	Neopterygii	Teleostei	Cypriniphysae	Cypriniformes				Cyprinoidea	Cyprinidae				Danio				Danio rerio
ESGDLWLGCHPNAFK	Eukaryota	Metazoa			Chordata	Craniata	Actinopterygii	Actinopteri	Neopterygii	Teleostei	Cypriniphysae	Cypriniformes				Cyprinoidea	Cyprinidae				Danio				Danio rerio
ESHMSENCPALDLPGSVQELQDLCK	Eukaryota	Metazoa			Chordata	Craniata	Actinopterygii	Actinopteri	Neopterygii	Teleostei	Cypriniphysae	Cypriniformes				Cyprinoidea	Cyprinidae				Danio				Danio rerio
ESSGPYPGVLDLWGGGGGLIEYR	Eukaryota	Metazoa			Chordata	Craniata	Actinopterygii	Actinopteri	Neopterygii	Teleostei	Cypriniphysae	Cypriniformes				Cyprinoidea	Cyprinidae				Danio				Danio rerio
EVGVELFDEAHK	Eukaryota	Metazoa			Chordata	Craniata	Actinopterygii	Actinopteri	Neopterygii	Teleostei	Cypriniphysae	Cypriniformes				Cyprinoidea	Cyprinidae				Danio				Danio rerio
EVLQSENPTQHPAYWDVVTSLVLQGR	Eukaryota	Metazoa			Chordata	Craniata	Actinopterygii	Actinopteri	Neopterygii	Teleostei	Cypriniphysae	Cypriniformes				Cyprinoidea	Cyprinidae				Danio				Danio rerio
EVVVIHQDPEALTDIQSLQNYILEELNVR	Eukaryota	Metazoa			Chordata	Craniata	Actinopterygii	Actinopteri	Neopterygii	Teleostei	Cypriniphysae	Cypriniformes				Cyprinoidea	Cyprinidae				Danio				Danio rerio
FAIEIHPTGEVSSYTATADYAYDGK	Eukaryota	Metazoa			Chordata	Craniata	Actinopterygii	Actinopteri	Neopterygii	Teleostei	Cypriniphysae	Cypriniformes				Cyprinoidea	Cyprinidae				Danio				Danio rerio
FCADGVLLSK	Eukaryota	Metazoa			Chordata	Craniata	Actinopterygii	Actinopteri	Neopterygii	Teleostei	Cypriniphysae	Cypriniformes				Cyprinoidea	Cyprinidae				Danio				Danio rerio
FEHMEK	Eukaryota	Metazoa			Chordata	Craniata	Actinopterygii	Actinopteri	Neopterygii	Teleostei	Cypriniphysae	Cypriniformes				Cyprinoidea	Cyprinidae				Danio				Danio rerio
FEQGFITDPVVLSPHHTVGDVLEAK	Eukaryota	Metazoa			Chordata	Craniata	Actinopterygii	Actinopteri	Neopterygii	Teleostei	Cypriniphysae	Cypriniformes				Cyprinoidea	Cyprinidae				Danio				Danio rerio
FLAGEFTTPEFIQTLVIALQR	Eukaryota	Metazoa			Chordata	Craniata	Actinopterygii	Actinopteri	Neopterygii	Teleostei	Cypriniphysae	Cypriniformes				Cyprinoidea	Cyprinidae				Danio				Danio rerio
FICHVVGITYQNIEYR	Eukaryota	Metazoa			Chordata	Craniata	Actinopterygii	Actinopteri	Neopterygii	Teleostei	Cypriniphysae	Cypriniformes				Cyprinoidea	Cyprinidae				Danio				Danio rerio
FILEEPFSAIGELLIK	Eukaryota	Metazoa			Chordata	Craniata	Actinopterygii	Actinopteri	Neopterygii	Teleostei	Cypriniphysae	Cypriniformes				Cyprinoidea	Cyprinidae				Danio				Danio rerio
FIQEVEFHLLK	Eukaryota	Metazoa			Chordata	Craniata	Actinopterygii	Actinopteri	Neopterygii	Teleostei	Cypriniphysae	Cypriniformes				Cyprinoidea	Cyprinidae				Danio				Danio rerio
FQLSPFNHSHQVAK	Eukaryota	Metazoa			Chordata	Craniata	Actinopterygii	Actinopteri	Neopterygii	Teleostei	Cypriniphysae	Cypriniformes				Cyprinoidea	Cyprinidae				Danio				Danio rerio
FSDIVDSVVFIDTEALIEDLR	Eukaryota	Metazoa			Chordata	Craniata	Actinopterygii	Actinopteri	Neopterygii	Teleostei	Cypriniphysae	Cypriniformes				Cyprinoidea	Cyprinidae				Danio				Danio rerio
FTDILNSFNEK	Eukaryota	Metazoa			Chordata	Craniata	Actinopterygii	Actinopteri	Neopterygii	Teleostei	Cypriniphysae	Cypriniformes				Cyprinoidea	Cyprinidae				Danio				Danio rerio
FTLELAAQLQIPIK	Eukaryota	Metazoa			Chordata	Craniata	Actinopterygii	Actinopteri	Neopterygii	Teleostei	Cypriniphysae	Cypriniformes				Cyprinoidea	Cyprinidae				Danio				Danio rerio
FVDPLFYEYAGTWPK	Eukaryota	Metazoa			Chordata	Craniata	Actinopterygii	Actinopteri	Neopterygii	Teleostei	Cypriniphysae	Cypriniformes				Cyprinoidea	Cyprinidae				Danio				Danio rerio
FYFEHLLSK	Eukaryota	Metazoa			Chordata	Craniata	Actinopterygii	Actinopteri	Neopterygii	Teleostei	Cypriniphysae	Cypriniformes				Cyprinoidea	Cyprinidae				Danio				Danio rerio
GAYHPFTHVYTPSDVK	Eukaryota	Metazoa			Chordata	Craniata	Actinopterygii	Actinopteri	Neopterygii	Teleostei	Cypriniphysae	Cypriniformes				Cyprinoidea	Cyprinidae				Danio				Danio rerio
GEFDESLPSPR	Eukaryota	Metazoa			Chordata	Craniata	Actinopterygii	Actinopteri	Neopterygii	Teleostei	Cypriniphysae	Cypriniformes				Cyprinoidea	Cyprinidae				Danio				Danio rerio
GETVSCWYTGTLEDGTVFDTNIPATAK	Eukaryota	Metazoa			Chordata	Craniata	Actinopterygii	Actinopteri	Neopterygii	Teleostei	Cypriniphysae	Cypriniformes				Cyprinoidea	Cyprinidae				Danio				Danio rerio
GFGFIEYEKPQSSLDAVSSMNLFDLGGQYLR	Eukaryota	Metazoa			Chordata	Craniata	Actinopterygii	Actinopteri	Neopterygii	Teleostei	Cypriniphysae	Cypriniformes				Cyprinoidea	Cyprinidae				Danio				Danio rerio
GIAGLGDVAEIK	Eukaryota	Metazoa			Chordata	Craniata	Actinopterygii	Actinopteri	Neopterygii	Teleostei	Cypriniphysae	Cypriniformes				Cyprinoidea	Cyprinidae				Danio				Danio rerio
GLDHLTLAEFVK	Eukaryota	Metazoa			Chordata	Craniata	Actinopterygii	Actinopteri	Neopterygii	Teleostei	Cypriniphysae	Cypriniformes				Cyprinoidea	Cyprinidae				Danio				Danio rerio
GLDTVVHLLSDAVLQPR	Eukaryota	Metazoa			Chordata	Craniata	Actinopterygii	Actinopteri	Neopterygii	Teleostei	Cypriniphysae	Cypriniformes				Cyprinoidea	Cyprinidae				Danio				Danio rerio
GLGVVVQELSNELR	Eukaryota	Metazoa			Chordata	Craniata	Actinopterygii	Actinopteri	Neopterygii	Teleostei	Cypriniphysae	Cypriniformes				Cyprinoidea	Cyprinidae				Danio				Danio rerio
GLHTAIDASQSTDLVFASILAAFSAATCK	Eukaryota	Metazoa			Chordata	Craniata	Actinopterygii	Actinopteri	Neopterygii	Teleostei	Cypriniphysae	Cypriniformes				Cyprinoidea	Cyprinidae				Danio				Danio rerio
GLVLQPLAELK	Eukaryota	Metazoa			Chordata	Craniata	Actinopterygii	Actinopteri	Neopterygii	Teleostei	Cypriniphysae	Cypriniformes				Cyprinoidea	Cyprinidae				Danio				Danio rerio
GMLALATDTPDFLR	Eukaryota	Metazoa			Chordata	Craniata	Actinopterygii	Actinopteri	Neopterygii	Teleostei	Cypriniphysae	Cypriniformes				Cyprinoidea	Cyprinidae				Danio				Danio rerio
GTIAVVVDTLK	Eukaryota	Metazoa			Chordata	Craniata	Actinopterygii	Actinopteri	Neopterygii	Teleostei	Cypriniphysae	Cypriniformes				Cyprinoidea	Cyprinidae				Danio				Danio rerio
GYHETIYDILNDAIFDEDHEELVIVK	Eukaryota	Metazoa			Chordata	Craniata	Actinopterygii	Actinopteri	Neopterygii	Teleostei	Cypriniphysae	Cypriniformes				Cyprinoidea	Cyprinidae				Danio				Danio rerio
GYIVEVQDEGSHEWK	Eukaryota	Metazoa			Chordata	Craniata	Actinopterygii	Actinopteri	Neopterygii	Teleostei	Cypriniphysae	Cypriniformes				Cyprinoidea	Cyprinidae				Danio				Danio rerio
GYNALQYYENLSELK	Eukaryota	Metazoa			Chordata	Craniata	Actinopterygii	Actinopteri	Neopterygii	Teleostei	Cypriniphysae	Cypriniformes				Cyprinoidea	Cyprinidae				Danio				Danio rerio
HCEDINECLLGPHHCVTGER	Eukaryota	Metazoa			Chordata	Craniata	Actinopterygii	Actinopteri	Neopterygii	Teleostei	Cypriniphysae	Cypriniformes				Cyprinoidea	Cyprinidae				Danio				Danio rerio
HCIAVPTCPAELLRPIHEIATEAVSK	Eukaryota	Metazoa			Chordata	Craniata	Actinopterygii	Actinopteri	Neopterygii	Teleostei	Cypriniphysae	Cypriniformes				Cyprinoidea	Cyprinidae				Danio				Danio rerio
HDVSGNLETVLLSLCK	Eukaryota	Metazoa			Chordata	Craniata	Actinopterygii	Actinopteri	Neopterygii	Teleostei	Cypriniphysae	Cypriniformes				Cyprinoidea	Cyprinidae				Danio				Danio rerio
HEAAFDNVVSDLSGK	Eukaryota	Metazoa			Chordata	Craniata	Actinopterygii	Actinopteri	Neopterygii	Teleostei	Cypriniphysae	Cypriniformes				Cyprinoidea	Cyprinidae				Danio				Danio rerio
HFVISHTSGYSDPAILQR	Eukaryota	Metazoa			Chordata	Craniata	Actinopterygii	Actinopteri	Neopterygii	Teleostei	Cypriniphysae	Cypriniformes				Cyprinoidea	Cyprinidae				Danio				Danio rerio
HGEIECSTDLNVDEK	Eukaryota	Metazoa			Chordata	Craniata	Actinopterygii	Actinopteri	Neopterygii	Teleostei	Cypriniphysae	Cypriniformes				Cyprinoidea	Cyprinidae				Danio				Danio rerio
HLFIPFSHEGQYGISSEVK	Eukaryota	Metazoa			Chordata	Craniata	Actinopterygii	Actinopteri	Neopterygii	Teleostei	Cypriniphysae	Cypriniformes				Cyprinoidea	Cyprinidae				Danio				Danio rerio
HIIMEQGQEILQGDEGDPYLK	Eukaryota	Metazoa			Chordata	Craniata	Actinopterygii	Actinopteri	Neopterygii	Teleostei	Cypriniphysae	Cypriniformes				Cyprinoidea	Cyprinidae				Danio				Danio rerio
HLNVFGNDYSTPDGTGVR	Eukaryota	Metazoa			Chordata	Craniata	Actinopterygii	Actinopteri	Neopterygii	Teleostei	Cypriniphysae	Cypriniformes				Cyprinoidea	Cyprinidae				Danio				Danio rerio
HLSAEISQPIIFEFFK	Eukaryota	Metazoa			Chordata	Craniata	Actinopterygii	Actinopteri	Neopterygii	Teleostei	Cypriniphysae	Cypriniformes				Cyprinoidea	Cyprinidae				Danio				Danio rerio
HLSAEISQPIIFEYSK	Eukaryota	Metazoa			Chordata	Craniata	Actinopterygii	Actinopteri	Neopterygii	Teleostei	Cypriniphysae	Cypriniformes				Cyprinoidea	Cyprinidae				Danio				Danio rerio
HQFEAPGHPGKPVASDLSEDALTLGWTMPLFDGGSPISGYIIER	Eukaryota	Metazoa			Chordata	Craniata	Actinopterygii	Actinopteri	Neopterygii	Teleostei	Cypriniphysae	Cypriniformes				Cyprinoidea	Cyprinidae				Danio				Danio rerio
HSAIYPVEEELQAVQR	Eukaryota	Metazoa			Chordata	Craniata	Actinopterygii	Actinopteri	Neopterygii	Teleostei	Cypriniphysae	Cypriniformes				Cyprinoidea	Cyprinidae				Danio				Danio rerio
HSGSVAFDEIVNIAR	Eukaryota	Metazoa			Chordata	Craniata	Actinopterygii	Actinopteri	Neopterygii	Teleostei	Cypriniphysae	Cypriniformes				Cyprinoidea	Cyprinidae				Danio				Danio rerio
HSIIPSGVVEEINELFVPENR	Eukaryota	Metazoa			Chordata	Craniata	Actinopterygii	Actinopteri	Neopterygii	Teleostei	Cypriniphysae	Cypriniformes				Cyprinoidea	Cyprinidae				Danio				Danio rerio
HTLVLSQQQLQR	Eukaryota	Metazoa			Chordata	Craniata	Actinopterygii	Actinopteri	Neopterygii	Teleostei	Cypriniphysae	Cypriniformes				Cyprinoidea	Cyprinidae				Danio				Danio rerio
HVEGGSAGLIPSQLLEEK	Eukaryota	Metazoa			Chordata	Craniata	Actinopterygii	Actinopteri	Neopterygii	Teleostei	Cypriniphysae	Cypriniformes				Cyprinoidea	Cyprinidae				Danio				Danio rerio
HVTAQSAPLPLTAAEEELR	Eukaryota	Metazoa			Chordata	Craniata	Actinopterygii	Actinopteri	Neopterygii	Teleostei	Cypriniphysae	Cypriniformes				Cyprinoidea	Cyprinidae				Danio				Danio rerio
HYCVVLNPAVR	Eukaryota	Metazoa			Chordata	Craniata	Actinopterygii	Actinopteri	Neopterygii	Teleostei	Cypriniphysae	Cypriniformes				Cyprinoidea	Cyprinidae				Danio				Danio rerio
HYDCTGDCGDFSSYMSR	Eukaryota	Metazoa			Chordata	Craniata	Actinopterygii	Actinopteri	Neopterygii	Teleostei	Cypriniphysae	Cypriniformes				Cyprinoidea	Cyprinidae				Danio				Danio rerio
LAEGEFIQGILENEDAIHLIQFEHQK	Eukaryota	Metazoa			Chordata	Craniata	Actinopterygii	Actinopteri	Neopterygii	Teleostei	Cypriniphysae	Cypriniformes				Cyprinoidea	Cyprinidae				Danio				Danio rerio
LAELEVLLQNLNSR	Eukaryota	Metazoa			Chordata	Craniata	Actinopterygii	Actinopteri	Neopterygii	Teleostei	Cypriniphysae	Cypriniformes				Cyprinoidea	Cyprinidae				Danio				Danio rerio
IAHGWQIEEADDWLR	Eukaryota	Metazoa			Chordata	Craniata	Actinopterygii	Actinopteri	Neopterygii	Teleostei	Cypriniphysae	Cypriniformes				Cyprinoidea	Cyprinidae				Danio				Danio rerio
ICNPSDTECLQYHLR	Eukaryota	Metazoa			Chordata	Craniata	Actinopterygii	Actinopteri	Neopterygii	Teleostei	Cypriniphysae	Cypriniformes				Cyprinoidea	Cyprinidae				Danio				Danio rerio
IDDLTAGLLNLSELHAFQLR	Eukaryota	Metazoa			Chordata	Craniata	Actinopterygii	Actinopteri	Neopterygii	Teleostei	Cypriniphysae	Cypriniformes				Cyprinoidea	Cyprinidae				Danio				Danio rerio
LDPNTPDNLIGLLGNDIINVVASDHR	Eukaryota	Metazoa			Chordata	Craniata	Actinopterygii	Actinopteri	Neopterygii	Teleostei	Cypriniphysae	Cypriniformes				Cyprinoidea	Cyprinidae				Danio				Danio rerio
IDTAEWGIDLPTVESQLGSHR	Eukaryota	Metazoa			Chordata	Craniata	Actinopterygii	Actinopteri	Neopterygii	Teleostei	Cypriniphysae	Cypriniformes				Cyprinoidea	Cyprinidae				Danio				Danio rerio
LDYQVELQNLHR	Eukaryota	Metazoa			Chordata	Craniata	Actinopterygii	Actinopteri	Neopterygii	Teleostei	Cypriniphysae	Cypriniformes				Cyprinoidea	Cyprinidae				Danio				Danio rerio
LEADLVQIQGEMEDVVQEAR	Eukaryota	Metazoa			Chordata	Craniata	Actinopterygii	Actinopteri	Neopterygii	Teleostei	Cypriniphysae	Cypriniformes				Cyprinoidea	Cyprinidae				Danio				Danio rerio
LEGFELPAK	Eukaryota	Metazoa			Chordata	Craniata	Actinopterygii	Actinopteri	Neopterygii	Teleostei	Cypriniphysae	Cypriniformes				Cyprinoidea	Cyprinidae				Danio				Danio rerio
LEPSPSHLPLTPEFNGDAYYLAIGGGVAQHNWSHIQSVLQDQGFR	Eukaryota	Metazoa			Chordata	Craniata	Actinopterygii	Actinopteri	Neopterygii	Teleostei	Cypriniphysae	Cypriniformes				Cyprinoidea	Cyprinidae				Danio				Danio rerio
IETELQDICSDVLGLLEK	Eukaryota	Metazoa			Chordata	Craniata	Actinopterygii	Actinopteri	Neopterygii	Teleostei	Cypriniphysae	Cypriniformes				Cyprinoidea	Cyprinidae				Danio				Danio rerio
LEVNGENAHPLFAFLK	Eukaryota	Metazoa			Chordata	Craniata	Actinopterygii	Actinopteri	Neopterygii	Teleostei	Cypriniphysae	Cypriniformes				Cyprinoidea	Cyprinidae				Danio				Danio rerio
LFDIGLLSK	Eukaryota	Metazoa			Chordata	Craniata	Actinopterygii	Actinopteri	Neopterygii	Teleostei	Cypriniphysae	Cypriniformes				Cyprinoidea	Cyprinidae				Danio				Danio rerio
LFQNDGQPISLLFTLWK	Eukaryota	Metazoa			Chordata	Craniata	Actinopterygii	Actinopteri	Neopterygii	Teleostei	Cypriniphysae	Cypriniformes				Cyprinoidea	Cyprinidae				Danio				Danio rerio
LFSEVFQWLPLAQCINDK	Eukaryota	Metazoa			Chordata	Craniata	Actinopterygii	Actinopteri	Neopterygii	Teleostei	Cypriniphysae	Cypriniformes				Cyprinoidea	Cyprinidae				Danio				Danio rerio
LFTLDSVIGLK	Eukaryota	Metazoa			Chordata	Craniata	Actinopterygii	Actinopteri	Neopterygii	Teleostei	Cypriniphysae	Cypriniformes				Cyprinoidea	Cyprinidae				Danio				Danio rerio
LGAIPQIHEEGNALFK	Eukaryota	Metazoa			Chordata	Craniata	Actinopterygii	Actinopteri	Neopterygii	Teleostei	Cypriniphysae	Cypriniformes				Cyprinoidea	Cyprinidae				Danio				Danio rerio
IGEDFLTDLFQLR	Eukaryota	Metazoa			Chordata	Craniata	Actinopterygii	Actinopteri	Neopterygii	Teleostei	Cypriniphysae	Cypriniformes				Cyprinoidea	Cyprinidae				Danio				Danio rerio
LGFLNEQQFEEWVRPHDMLGPK	Eukaryota	Metazoa			Chordata	Craniata	Actinopterygii	Actinopteri	Neopterygii	Teleostei	Cypriniphysae	Cypriniformes				Cyprinoidea	Cyprinidae				Danio				Danio rerio
IGIFSDDEDVTGR	Eukaryota	Metazoa			Chordata	Craniata	Actinopterygii	Actinopteri	Neopterygii	Teleostei	Cypriniphysae	Cypriniformes				Cyprinoidea	Cyprinidae				Danio				Danio rerio
IGQITTEQMHTFVQNNFTSAR	Eukaryota	Metazoa			Chordata	Craniata	Actinopterygii	Actinopteri	Neopterygii	Teleostei	Cypriniphysae	Cypriniformes				Cyprinoidea	Cyprinidae				Danio				Danio rerio
LGTNGVVHYINELLIPDSAK	Eukaryota	Metazoa			Chordata	Craniata	Actinopterygii	Actinopteri	Neopterygii	Teleostei	Cypriniphysae	Cypriniformes				Cyprinoidea	Cyprinidae				Danio				Danio rerio
LHDTNSDGVLDVQELEALFTK	Eukaryota	Metazoa			Chordata	Craniata	Actinopterygii	Actinopteri	Neopterygii	Teleostei	Cypriniphysae	Cypriniformes				Cyprinoidea	Cyprinidae				Danio				Danio rerio
LHDTTDYPWRPTIK	Eukaryota	Metazoa			Chordata	Craniata	Actinopterygii	Actinopteri	Neopterygii	Teleostei	Cypriniphysae	Cypriniformes				Cyprinoidea	Cyprinidae				Danio				Danio rerio
IHELTNTPTQYEAR	Eukaryota	Metazoa			Chordata	Craniata	Actinopterygii	Actinopteri	Neopterygii	Teleostei	Cypriniphysae	Cypriniformes				Cyprinoidea	Cyprinidae				Danio				Danio rerio
IHFLGTSYLQDGPEGNDIR	Eukaryota	Metazoa			Chordata	Craniata	Actinopterygii	Actinopteri	Neopterygii	Teleostei	Cypriniphysae	Cypriniformes				Cyprinoidea	Cyprinidae				Danio				Danio rerio
LHILPVDSQVESTDTTSVVTVPVSLR	Eukaryota	Metazoa			Chordata	Craniata	Actinopterygii	Actinopteri	Neopterygii	Teleostei	Cypriniphysae	Cypriniformes				Cyprinoidea	Cyprinidae				Danio				Danio rerio
LHTVDIGGQGTTSEVVQSIMR	Eukaryota	Metazoa			Chordata	Craniata	Actinopterygii	Actinopteri	Neopterygii	Teleostei	Cypriniphysae	Cypriniformes				Cyprinoidea	Cyprinidae				Danio				Danio rerio
IIEDISEAVIFGFSIPAIK	Eukaryota	Metazoa			Chordata	Craniata	Actinopterygii	Actinopteri	Neopterygii	Teleostei	Cypriniphysae	Cypriniformes				Cyprinoidea	Cyprinidae				Danio				Danio rerio
IIHTAAAPAAIGPYSQAVLVDR	Eukaryota	Metazoa			Chordata	Craniata	Actinopterygii	Actinopteri	Neopterygii	Teleostei	Cypriniphysae	Cypriniformes				Cyprinoidea	Cyprinidae				Danio				Danio rerio
IITITGTQDQIQNAQYLLQNSALHLLGR	Eukaryota	Metazoa			Chordata	Craniata	Actinopterygii	Actinopteri	Neopterygii	Teleostei	Cypriniphysae	Cypriniformes				Cyprinoidea	Cyprinidae				Danio				Danio rerio
IIVENLYYPVSLEVLHQIFSK	Eukaryota	Metazoa			Chordata	Craniata	Actinopterygii	Actinopteri	Neopterygii	Teleostei	Cypriniphysae	Cypriniformes				Cyprinoidea	Cyprinidae				Danio				Danio rerio
LMPILEAIR	Eukaryota	Metazoa			Chordata	Craniata	Actinopterygii	Actinopteri	Neopterygii	Teleostei	Cypriniphysae	Cypriniformes				Cyprinoidea	Cyprinidae				Danio				Danio rerio
LMVDEFVTHTLPFAQINEAFDLMHAGK	Eukaryota	Metazoa			Chordata	Craniata	Actinopterygii	Actinopteri	Neopterygii	Teleostei	Cypriniphysae	Cypriniformes				Cyprinoidea	Cyprinidae				Danio				Danio rerio
LNENFLVDFGAEPEGPALAHELR	Eukaryota	Metazoa			Chordata	Craniata	Actinopterygii	Actinopteri	Neopterygii	Teleostei	Cypriniphysae	Cypriniformes				Cyprinoidea	Cyprinidae				Danio				Danio rerio
INIHVMPDTPEIILGK	Eukaryota	Metazoa			Chordata	Craniata	Actinopterygii	Actinopteri	Neopterygii	Teleostei	Cypriniphysae	Cypriniformes				Cyprinoidea	Cyprinidae				Danio				Danio rerio
LPIIFTTYAK	Eukaryota	Metazoa			Chordata	Craniata	Actinopterygii	Actinopteri	Neopterygii	Teleostei	Cypriniphysae	Cypriniformes				Cyprinoidea	Cyprinidae				Danio				Danio rerio
LPVDMLAFELAK	Eukaryota	Metazoa			Chordata	Craniata	Actinopterygii	Actinopteri	Neopterygii	Teleostei	Cypriniphysae	Cypriniformes				Cyprinoidea	Cyprinidae				Danio				Danio rerio
LQELHAQLTAK	Eukaryota	Metazoa			Chordata	Craniata	Actinopterygii	Actinopteri	Neopterygii	Teleostei	Cypriniphysae	Cypriniformes				Cyprinoidea	Cyprinidae				Danio				Danio rerio
LQQELDDMLVDQDHLR	Eukaryota	Metazoa			Chordata	Craniata	Actinopterygii	Actinopteri	Neopterygii	Teleostei	Cypriniphysae	Cypriniformes				Cyprinoidea	Cyprinidae				Danio				Danio rerio
IQTELDNVSCLLEDAEK	Eukaryota	Metazoa			Chordata	Craniata	Actinopterygii	Actinopteri	Neopterygii	Teleostei	Cypriniphysae	Cypriniformes				Cyprinoidea	Cyprinidae				Danio				Danio rerio
LSAEEFEAIFNYYDK	Eukaryota	Metazoa			Chordata	Craniata	Actinopterygii	Actinopteri	Neopterygii	Teleostei	Cypriniphysae	Cypriniformes				Cyprinoidea	Cyprinidae				Danio				Danio rerio
LSFPSGGAIELGQHLFK	Eukaryota	Metazoa			Chordata	Craniata	Actinopterygii	Actinopteri	Neopterygii	Teleostei	Cypriniphysae	Cypriniformes				Cyprinoidea	Cyprinidae				Danio				Danio rerio
LSGFVIEACK	Eukaryota	Metazoa			Chordata	Craniata	Actinopterygii	Actinopteri	Neopterygii	Teleostei	Cypriniphysae	Cypriniformes				Cyprinoidea	Cyprinidae				Danio				Danio rerio
ISHDVSTGIIQMTIEHFTK	Eukaryota	Metazoa			Chordata	Craniata	Actinopterygii	Actinopteri	Neopterygii	Teleostei	Cypriniphysae	Cypriniformes				Cyprinoidea	Cyprinidae				Danio				Danio rerio
LSNLTSSLSDQIISHLFSQQELSANTELIQTHR	Eukaryota	Metazoa			Chordata	Craniata	Actinopterygii	Actinopteri	Neopterygii	Teleostei	Cypriniphysae	Cypriniformes				Cyprinoidea	Cyprinidae				Danio				Danio rerio
LSPGEYVIIPSSYEPHQEGEFILR	Eukaryota	Metazoa			Chordata	Craniata	Actinopterygii	Actinopteri	Neopterygii	Teleostei	Cypriniphysae	Cypriniformes				Cyprinoidea	Cyprinidae				Danio				Danio rerio
ISWLDYLYYFSYIK	Eukaryota	Metazoa			Chordata	Craniata	Actinopterygii	Actinopteri	Neopterygii	Teleostei	Cypriniphysae	Cypriniformes				Cyprinoidea	Cyprinidae				Danio				Danio rerio
LSYLEFGQFLQELQLEHAR	Eukaryota	Metazoa			Chordata	Craniata	Actinopterygii	Actinopteri	Neopterygii	Teleostei	Cypriniphysae	Cypriniformes				Cyprinoidea	Cyprinidae				Danio				Danio rerio
ITAEIQLANHGSSR	Eukaryota	Metazoa			Chordata	Craniata	Actinopterygii	Actinopteri	Neopterygii	Teleostei	Cypriniphysae	Cypriniformes				Cyprinoidea	Cyprinidae				Danio				Danio rerio
ITEAGLIEILEK	Eukaryota	Metazoa			Chordata	Craniata	Actinopterygii	Actinopteri	Neopterygii	Teleostei	Cypriniphysae	Cypriniformes				Cyprinoidea	Cyprinidae				Danio				Danio rerio
ITGIEECDLLLLIGTNPR	Eukaryota	Metazoa			Chordata	Craniata	Actinopterygii	Actinopteri	Neopterygii	Teleostei	Cypriniphysae	Cypriniformes				Cyprinoidea	Cyprinidae				Danio				Danio rerio
LTPIGDPTMIVEWLHDGKPLAAANR	Eukaryota	Metazoa			Chordata	Craniata	Actinopterygii	Actinopteri	Neopterygii	Teleostei	Cypriniphysae	Cypriniformes				Cyprinoidea	Cyprinidae				Danio				Danio rerio
ITSFGQYELR	Eukaryota	Metazoa			Chordata	Craniata	Actinopterygii	Actinopteri	Neopterygii	Teleostei	Cypriniphysae	Cypriniformes				Cyprinoidea	Cyprinidae				Danio				Danio rerio
LTWTKPANDGGSDILGYLVECK	Eukaryota	Metazoa			Chordata	Craniata	Actinopterygii	Actinopteri	Neopterygii	Teleostei	Cypriniphysae	Cypriniformes				Cyprinoidea	Cyprinidae				Danio				Danio rerio
LVDLSLEGNPLCHHFK	Eukaryota	Metazoa			Chordata	Craniata	Actinopterygii	Actinopteri	Neopterygii	Teleostei	Cypriniphysae	Cypriniformes				Cyprinoidea	Cyprinidae				Danio				Danio rerio
LVELNEDVRPYIR	Eukaryota	Metazoa			Chordata	Craniata	Actinopterygii	Actinopteri	Neopterygii	Teleostei	Cypriniphysae	Cypriniformes				Cyprinoidea	Cyprinidae				Danio				Danio rerio
LVLASGPVGIMQAVLDHAIPYLHVR	Eukaryota	Metazoa			Chordata	Craniata	Actinopterygii	Actinopteri	Neopterygii	Teleostei	Cypriniphysae	Cypriniformes				Cyprinoidea	Cyprinidae				Danio				Danio rerio
IVIENEELVLGLTKPASR	Eukaryota	Metazoa			Chordata	Craniata	Actinopterygii	Actinopteri	Neopterygii	Teleostei	Cypriniphysae	Cypriniformes				Cyprinoidea	Cyprinidae				Danio				Danio rerio
IVPVQITINLLR	Eukaryota	Metazoa			Chordata	Craniata	Actinopterygii	Actinopteri	Neopterygii	Teleostei	Cypriniphysae	Cypriniformes				Cyprinoidea	Cyprinidae				Danio				Danio rerio
LYESELHFIEACLK	Eukaryota	Metazoa			Chordata	Craniata	Actinopterygii	Actinopteri	Neopterygii	Teleostei	Cypriniphysae	Cypriniformes				Cyprinoidea	Cyprinidae				Danio				Danio rerio
LYHPVSEDLAFLYGTILTDGK	Eukaryota	Metazoa			Chordata	Craniata	Actinopterygii	Actinopteri	Neopterygii	Teleostei	Cypriniphysae	Cypriniformes				Cyprinoidea	Cyprinidae				Danio				Danio rerio
MSDSLAPSASK	Eukaryota	Metazoa			Chordata	Craniata	Actinopterygii	Actinopteri	Neopterygii	Teleostei	Cypriniphysae	Cypriniformes				Cyprinoidea	Cyprinidae				Danio				Danio rerio
MTASLATHEK	Eukaryota	Metazoa			Chordata	Craniata	Actinopterygii	Actinopteri	Neopterygii	Teleostei	Cypriniphysae	Cypriniformes				Cyprinoidea	Cyprinidae				Danio				Danio rerio
NCILKPGGSEDAADMLK	Eukaryota	Metazoa			Chordata	Craniata	Actinopterygii	Actinopteri	Neopterygii	Teleostei	Cypriniphysae	Cypriniformes				Cyprinoidea	Cyprinidae				Danio				Danio rerio
NDNGQVAFVCHHAIPESER	Eukaryota	Metazoa			Chordata	Craniata	Actinopterygii	Actinopteri	Neopterygii	Teleostei	Cypriniphysae	Cypriniformes				Cyprinoidea	Cyprinidae				Danio				Danio rerio
NHDHEVLLTNTFCK	Eukaryota	Metazoa			Chordata	Craniata	Actinopterygii	Actinopteri	Neopterygii	Teleostei	Cypriniphysae	Cypriniformes				Cyprinoidea	Cyprinidae				Danio				Danio rerio
NLVHQLGVTLEELYNGSTR	Eukaryota	Metazoa			Chordata	Craniata	Actinopterygii	Actinopteri	Neopterygii	Teleostei	Cypriniphysae	Cypriniformes				Cyprinoidea	Cyprinidae				Danio				Danio rerio
NNEDVDAIKPLFSVNVDHR	Eukaryota	Metazoa			Chordata	Craniata	Actinopterygii	Actinopteri	Neopterygii	Teleostei	Cypriniphysae	Cypriniformes				Cyprinoidea	Cyprinidae				Danio				Danio rerio
NPFDPPDAPEKPEIK	Eukaryota	Metazoa			Chordata	Craniata	Actinopterygii	Actinopteri	Neopterygii	Teleostei	Cypriniphysae	Cypriniformes				Cyprinoidea	Cyprinidae				Danio				Danio rerio
NSFVVSWKPPLSDGGSK	Eukaryota	Metazoa			Chordata	Craniata	Actinopterygii	Actinopteri	Neopterygii	Teleostei	Cypriniphysae	Cypriniformes				Cyprinoidea	Cyprinidae				Danio				Danio rerio
NSTLFYIIGQHSAR	Eukaryota	Metazoa			Chordata	Craniata	Actinopterygii	Actinopteri	Neopterygii	Teleostei	Cypriniphysae	Cypriniformes				Cyprinoidea	Cyprinidae				Danio				Danio rerio
NVLTDFLAVLEEK	Eukaryota	Metazoa			Chordata	Craniata	Actinopterygii	Actinopteri	Neopterygii	Teleostei	Cypriniphysae	Cypriniformes				Cyprinoidea	Cyprinidae				Danio				Danio rerio
QEVVASTETLQTSK	Eukaryota	Metazoa			Chordata	Craniata	Actinopterygii	Actinopteri	Neopterygii	Teleostei	Cypriniphysae	Cypriniformes				Cyprinoidea	Cyprinidae				Danio				Danio rerio
QHAFWVGLAR	Eukaryota	Metazoa			Chordata	Craniata	Actinopterygii	Actinopteri	Neopterygii	Teleostei	Cypriniphysae	Cypriniformes				Cyprinoidea	Cyprinidae				Danio				Danio rerio
QHEDFIWLHDAIVETEEYAGLIIPPAPPKPDFEGPR	Eukaryota	Metazoa			Chordata	Craniata	Actinopterygii	Actinopteri	Neopterygii	Teleostei	Cypriniphysae	Cypriniformes				Cyprinoidea	Cyprinidae				Danio				Danio rerio
QIFEILDEPGHVLVQSK	Eukaryota	Metazoa			Chordata	Craniata	Actinopterygii	Actinopteri	Neopterygii	Teleostei	Cypriniphysae	Cypriniformes				Cyprinoidea	Cyprinidae				Danio				Danio rerio
QLVIVITRPQDVGEYTYQVANSK	Eukaryota	Metazoa			Chordata	Craniata	Actinopterygii	Actinopteri	Neopterygii	Teleostei	Cypriniphysae	Cypriniformes				Cyprinoidea	Cyprinidae				Danio				Danio rerio
QSMPPSFSNSSNLYQGESK	Eukaryota	Metazoa			Chordata	Craniata	Actinopterygii	Actinopteri	Neopterygii	Teleostei	Cypriniphysae	Cypriniformes				Cyprinoidea	Cyprinidae				Danio				Danio rerio
QTVAEQVLVGSYCAFSNQGGLVHAK	Eukaryota	Metazoa			Chordata	Craniata	Actinopterygii	Actinopteri	Neopterygii	Teleostei	Cypriniphysae	Cypriniformes				Cyprinoidea	Cyprinidae				Danio				Danio rerio
QVGAAATGVTQALNELLQHIR	Eukaryota	Metazoa			Chordata	Craniata	Actinopterygii	Actinopteri	Neopterygii	Teleostei	Cypriniphysae	Cypriniformes				Cyprinoidea	Cyprinidae				Danio				Danio rerio
QWWFGGGTDLTPVYIDLEDATHFHK	Eukaryota	Metazoa			Chordata	Craniata	Actinopterygii	Actinopteri	Neopterygii	Teleostei	Cypriniphysae	Cypriniformes				Cyprinoidea	Cyprinidae				Danio				Danio rerio
SACYVVDDK	Eukaryota	Metazoa			Chordata	Craniata	Actinopterygii	Actinopteri	Neopterygii	Teleostei	Cypriniphysae	Cypriniformes				Cyprinoidea	Cyprinidae				Danio				Danio rerio
SDHYHEYEDAAEEFHPHIK	Eukaryota	Metazoa			Chordata	Craniata	Actinopterygii	Actinopteri	Neopterygii	Teleostei	Cypriniphysae	Cypriniformes				Cyprinoidea	Cyprinidae				Danio				Danio rerio
SDPLCVLLQSVGDDK	Eukaryota	Metazoa			Chordata	Craniata	Actinopterygii	Actinopteri	Neopterygii	Teleostei	Cypriniphysae	Cypriniformes				Cyprinoidea	Cyprinidae				Danio				Danio rerio
SEHTSILQSLTETLR	Eukaryota	Metazoa			Chordata	Craniata	Actinopterygii	Actinopteri	Neopterygii	Teleostei	Cypriniphysae	Cypriniformes				Cyprinoidea	Cyprinidae				Danio				Danio rerio
SEQSDQHIEHTTDGENQIVFTHR	Eukaryota	Metazoa			Chordata	Craniata	Actinopterygii	Actinopteri	Neopterygii	Teleostei	Cypriniphysae	Cypriniformes				Cyprinoidea	Cyprinidae				Danio				Danio rerio
SFFLMPGEHLENGIQDVYVLSEEEGLVLR	Eukaryota	Metazoa			Chordata	Craniata	Actinopterygii	Actinopteri	Neopterygii	Teleostei	Cypriniphysae	Cypriniformes				Cyprinoidea	Cyprinidae				Danio				Danio rerio
SFTYGSVEAHK	Eukaryota	Metazoa			Chordata	Craniata	Actinopterygii	Actinopteri	Neopterygii	Teleostei	Cypriniphysae	Cypriniformes				Cyprinoidea	Cyprinidae				Danio				Danio rerio
SGLDWCNAGWLSDGTVQYPITKPR	Eukaryota	Metazoa			Chordata	Craniata	Actinopterygii	Actinopteri	Neopterygii	Teleostei	Cypriniphysae	Cypriniformes				Cyprinoidea	Cyprinidae				Danio				Danio rerio
SGVYQHMSGSPVGGHAIK	Eukaryota	Metazoa			Chordata	Craniata	Actinopterygii	Actinopteri	Neopterygii	Teleostei	Cypriniphysae	Cypriniformes				Cyprinoidea	Cyprinidae				Danio				Danio rerio
SHILNVDITSQTFTDVNLR	Eukaryota	Metazoa			Chordata	Craniata	Actinopterygii	Actinopteri	Neopterygii	Teleostei	Cypriniphysae	Cypriniformes				Cyprinoidea	Cyprinidae				Danio				Danio rerio
SHSGHVTCLDFSSNGK	Eukaryota	Metazoa			Chordata	Craniata	Actinopterygii	Actinopteri	Neopterygii	Teleostei	Cypriniphysae	Cypriniformes				Cyprinoidea	Cyprinidae				Danio				Danio rerio
SLAVAQALADDLDFHVFPIQEFGK	Eukaryota	Metazoa			Chordata	Craniata	Actinopterygii	Actinopteri	Neopterygii	Teleostei	Cypriniphysae	Cypriniformes				Cyprinoidea	Cyprinidae				Danio				Danio rerio
SIEELHDWDGQSPPTIR	Eukaryota	Metazoa			Chordata	Craniata	Actinopterygii	Actinopteri	Neopterygii	Teleostei	Cypriniphysae	Cypriniformes				Cyprinoidea	Cyprinidae				Danio				Danio rerio
SIESFALDICEHFLTAFNHVTR	Eukaryota	Metazoa			Chordata	Craniata	Actinopterygii	Actinopteri	Neopterygii	Teleostei	Cypriniphysae	Cypriniformes				Cyprinoidea	Cyprinidae				Danio				Danio rerio
SLGNAAHLSSIK	Eukaryota	Metazoa			Chordata	Craniata	Actinopterygii	Actinopteri	Neopterygii	Teleostei	Cypriniphysae	Cypriniformes				Cyprinoidea	Cyprinidae				Danio				Danio rerio
SLGNIISVLDR	Eukaryota	Metazoa			Chordata	Craniata	Actinopterygii	Actinopteri	Neopterygii	Teleostei	Cypriniphysae	Cypriniformes				Cyprinoidea	Cyprinidae				Danio				Danio rerio
SLIDSLHEQGSLLPEAYAHSPQVEGR	Eukaryota	Metazoa			Chordata	Craniata	Actinopterygii	Actinopteri	Neopterygii	Teleostei	Cypriniphysae	Cypriniformes				Cyprinoidea	Cyprinidae				Danio				Danio rerio
SLLNMFPTDFLR	Eukaryota	Metazoa			Chordata	Craniata	Actinopterygii	Actinopteri	Neopterygii	Teleostei	Cypriniphysae	Cypriniformes				Cyprinoidea	Cyprinidae				Danio				Danio rerio
SIQHEITSLK	Eukaryota	Metazoa			Chordata	Craniata	Actinopterygii	Actinopteri	Neopterygii	Teleostei	Cypriniphysae	Cypriniformes				Cyprinoidea	Cyprinidae				Danio				Danio rerio
SITAVVVGADR	Eukaryota	Metazoa			Chordata	Craniata	Actinopterygii	Actinopteri	Neopterygii	Teleostei	Cypriniphysae	Cypriniformes				Cyprinoidea	Cyprinidae				Danio				Danio rerio
SLVLSIAFNLLDAEAK	Eukaryota	Metazoa			Chordata	Craniata	Actinopterygii	Actinopteri	Neopterygii	Teleostei	Cypriniphysae	Cypriniformes				Cyprinoidea	Cyprinidae				Danio				Danio rerio
SPYFIEYDDAAEEFHPFIK	Eukaryota	Metazoa			Chordata	Craniata	Actinopterygii	Actinopteri	Neopterygii	Teleostei	Cypriniphysae	Cypriniformes				Cyprinoidea	Cyprinidae				Danio				Danio rerio
SSVLQHTIVSLTENEQYLFR	Eukaryota	Metazoa			Chordata	Craniata	Actinopterygii	Actinopteri	Neopterygii	Teleostei	Cypriniphysae	Cypriniformes				Cyprinoidea	Cyprinidae				Danio				Danio rerio
STDEAGQALLNTGHYASEEVK	Eukaryota	Metazoa			Chordata	Craniata	Actinopterygii	Actinopteri	Neopterygii	Teleostei	Cypriniphysae	Cypriniformes				Cyprinoidea	Cyprinidae				Danio				Danio rerio
STDIAIVVLDKPSPPASVK	Eukaryota	Metazoa			Chordata	Craniata	Actinopterygii	Actinopteri	Neopterygii	Teleostei	Cypriniphysae	Cypriniformes				Cyprinoidea	Cyprinidae				Danio				Danio rerio
SVTELFSVSSNVYAVSR	Eukaryota	Metazoa			Chordata	Craniata	Actinopterygii	Actinopteri	Neopterygii	Teleostei	Cypriniphysae	Cypriniformes				Cyprinoidea	Cyprinidae				Danio				Danio rerio
SVTSTHTITTTTTTETTQNTNFQGIR	Eukaryota	Metazoa			Chordata	Craniata	Actinopterygii	Actinopteri	Neopterygii	Teleostei	Cypriniphysae	Cypriniformes				Cyprinoidea	Cyprinidae				Danio				Danio rerio
SWNIGAVVTDFNPLR	Eukaryota	Metazoa			Chordata	Craniata	Actinopterygii	Actinopteri	Neopterygii	Teleostei	Cypriniphysae	Cypriniformes				Cyprinoidea	Cyprinidae				Danio				Danio rerio
TAEIQAVSLYNSVQEVTQR	Eukaryota	Metazoa			Chordata	Craniata	Actinopterygii	Actinopteri	Neopterygii	Teleostei	Cypriniphysae	Cypriniformes				Cyprinoidea	Cyprinidae				Danio				Danio rerio
TAILGLLDILQSK	Eukaryota	Metazoa			Chordata	Craniata	Actinopterygii	Actinopteri	Neopterygii	Teleostei	Cypriniphysae	Cypriniformes				Cyprinoidea	Cyprinidae				Danio				Danio rerio
TAVEPALEGSPTAGSLK	Eukaryota	Metazoa			Chordata	Craniata	Actinopterygii	Actinopteri	Neopterygii	Teleostei	Cypriniphysae	Cypriniformes				Cyprinoidea	Cyprinidae				Danio				Danio rerio
TCEGTVTGLTSGHEYLFR	Eukaryota	Metazoa			Chordata	Craniata	Actinopterygii	Actinopteri	Neopterygii	Teleostei	Cypriniphysae	Cypriniformes				Cyprinoidea	Cyprinidae				Danio				Danio rerio
TCTSIAFTQTNPEDK	Eukaryota	Metazoa			Chordata	Craniata	Actinopterygii	Actinopteri	Neopterygii	Teleostei	Cypriniphysae	Cypriniformes				Cyprinoidea	Cyprinidae				Danio				Danio rerio
TDGEGFSLFLGNLNNNK	Eukaryota	Metazoa			Chordata	Craniata	Actinopterygii	Actinopteri	Neopterygii	Teleostei	Cypriniphysae	Cypriniformes				Cyprinoidea	Cyprinidae				Danio				Danio rerio
TDHGIYQITGTNPSGTK	Eukaryota	Metazoa			Chordata	Craniata	Actinopterygii	Actinopteri	Neopterygii	Teleostei	Cypriniphysae	Cypriniformes				Cyprinoidea	Cyprinidae				Danio				Danio rerio
TFEQLHTTIGHQALDDILPALLK	Eukaryota	Metazoa			Chordata	Craniata	Actinopterygii	Actinopteri	Neopterygii	Teleostei	Cypriniphysae	Cypriniformes				Cyprinoidea	Cyprinidae				Danio				Danio rerio
TGGIHEALLK	Eukaryota	Metazoa			Chordata	Craniata	Actinopterygii	Actinopteri	Neopterygii	Teleostei	Cypriniphysae	Cypriniformes				Cyprinoidea	Cyprinidae				Danio				Danio rerio
TGHYECAEHLIHCGADVNAK	Eukaryota	Metazoa			Chordata	Craniata	Actinopterygii	Actinopteri	Neopterygii	Teleostei	Cypriniphysae	Cypriniformes				Cyprinoidea	Cyprinidae				Danio				Danio rerio
TGTYSQLFHPEQLITGK	Eukaryota	Metazoa			Chordata	Craniata	Actinopterygii	Actinopteri	Neopterygii	Teleostei	Cypriniphysae	Cypriniformes				Cyprinoidea	Cyprinidae				Danio				Danio rerio
TLGQCGIICIEDLIHEIYTVGK	Eukaryota	Metazoa			Chordata	Craniata	Actinopterygii	Actinopteri	Neopterygii	Teleostei	Cypriniphysae	Cypriniformes				Cyprinoidea	Cyprinidae				Danio				Danio rerio
TLGVSHIVTGLLEGAIYQFR	Eukaryota	Metazoa			Chordata	Craniata	Actinopterygii	Actinopteri	Neopterygii	Teleostei	Cypriniphysae	Cypriniformes				Cyprinoidea	Cyprinidae				Danio				Danio rerio
TLPCHILSYVIAHSFGR	Eukaryota	Metazoa			Chordata	Craniata	Actinopterygii	Actinopteri	Neopterygii	Teleostei	Cypriniphysae	Cypriniformes				Cyprinoidea	Cyprinidae				Danio				Danio rerio
TLSDIHEYVYVDTDVLANAIHWLIK	Eukaryota	Metazoa			Chordata	Craniata	Actinopterygii	Actinopteri	Neopterygii	Teleostei	Cypriniphysae	Cypriniformes				Cyprinoidea	Cyprinidae				Danio				Danio rerio
TPDNQHLSIACNIAMK	Eukaryota	Metazoa			Chordata	Craniata	Actinopterygii	Actinopteri	Neopterygii	Teleostei	Cypriniphysae	Cypriniformes				Cyprinoidea	Cyprinidae				Danio				Danio rerio
TPILAIDPLQKPGEPENFHVGDIGK	Eukaryota	Metazoa			Chordata	Craniata	Actinopterygii	Actinopteri	Neopterygii	Teleostei	Cypriniphysae	Cypriniformes				Cyprinoidea	Cyprinidae				Danio				Danio rerio
TQVTQSNGVEALIHTILR	Eukaryota	Metazoa			Chordata	Craniata	Actinopterygii	Actinopteri	Neopterygii	Teleostei	Cypriniphysae	Cypriniformes				Cyprinoidea	Cyprinidae				Danio				Danio rerio
TSVSLSWTKPEFDGGAK	Eukaryota	Metazoa			Chordata	Craniata	Actinopterygii	Actinopteri	Neopterygii	Teleostei	Cypriniphysae	Cypriniformes				Cyprinoidea	Cyprinidae				Danio				Danio rerio
TVFQGLSQEALSACIQSLLHASDIIQK	Eukaryota	Metazoa			Chordata	Craniata	Actinopterygii	Actinopteri	Neopterygii	Teleostei	Cypriniphysae	Cypriniformes				Cyprinoidea	Cyprinidae				Danio				Danio rerio
TYSDEETK	Eukaryota	Metazoa			Chordata	Craniata	Actinopterygii	Actinopteri	Neopterygii	Teleostei	Cypriniphysae	Cypriniformes				Cyprinoidea	Cyprinidae				Danio				Danio rerio
VAPEHTIFASNTSSLPIADIASCTAR	Eukaryota	Metazoa			Chordata	Craniata	Actinopterygii	Actinopteri	Neopterygii	Teleostei	Cypriniphysae	Cypriniformes				Cyprinoidea	Cyprinidae				Danio				Danio rerio
VAQWMIQEPHNVGTFFGCIGK	Eukaryota	Metazoa			Chordata	Craniata	Actinopterygii	Actinopteri	Neopterygii	Teleostei	Cypriniphysae	Cypriniformes				Cyprinoidea	Cyprinidae				Danio				Danio rerio
VGAYLPGAHEEVVDIVSAFILTDK	Eukaryota	Metazoa			Chordata	Craniata	Actinopterygii	Actinopteri	Neopterygii	Teleostei	Cypriniphysae	Cypriniformes				Cyprinoidea	Cyprinidae				Danio				Danio rerio
VGDVTHHPVGESTPPAAYTVTDLVEYGIVIEMLSGGK	Eukaryota	Metazoa			Chordata	Craniata	Actinopterygii	Actinopteri	Neopterygii	Teleostei	Cypriniphysae	Cypriniformes				Cyprinoidea	Cyprinidae				Danio				Danio rerio
VGTDILEEEITQFEDYVQSVDIAAFNK	Eukaryota	Metazoa			Chordata	Craniata	Actinopterygii	Actinopteri	Neopterygii	Teleostei	Cypriniphysae	Cypriniformes				Cyprinoidea	Cyprinidae				Danio				Danio rerio
VHVTILPVDNQTPLVTVGPTFNVFEADK	Eukaryota	Metazoa			Chordata	Craniata	Actinopterygii	Actinopteri	Neopterygii	Teleostei	Cypriniphysae	Cypriniformes				Cyprinoidea	Cyprinidae				Danio				Danio rerio
VKPCIGGVILFHETLYQK	Eukaryota	Metazoa			Chordata	Craniata	Actinopterygii	Actinopteri	Neopterygii	Teleostei	Cypriniphysae	Cypriniformes				Cyprinoidea	Cyprinidae				Danio				Danio rerio
VLEIIEYSVK	Eukaryota	Metazoa			Chordata	Craniata	Actinopterygii	Actinopteri	Neopterygii	Teleostei	Cypriniphysae	Cypriniformes				Cyprinoidea	Cyprinidae				Danio				Danio rerio
VLGFCHLFLSPSQFPR	Eukaryota	Metazoa			Chordata	Craniata	Actinopterygii	Actinopteri	Neopterygii	Teleostei	Cypriniphysae	Cypriniformes				Cyprinoidea	Cyprinidae				Danio				Danio rerio
VLTVTAVRPTLESALQSANEGVAAISFPDAVYR	Eukaryota	Metazoa			Chordata	Craniata	Actinopterygii	Actinopteri	Neopterygii	Teleostei	Cypriniphysae	Cypriniformes				Cyprinoidea	Cyprinidae				Danio				Danio rerio
VMVIVTDGESHDHHNLK	Eukaryota	Metazoa			Chordata	Craniata	Actinopterygii	Actinopteri	Neopterygii	Teleostei	Cypriniphysae	Cypriniformes				Cyprinoidea	Cyprinidae				Danio				Danio rerio
VNGRPLEMIEPVTLQYK	Eukaryota	Metazoa			Chordata	Craniata	Actinopterygii	Actinopteri	Neopterygii	Teleostei	Cypriniphysae	Cypriniformes				Cyprinoidea	Cyprinidae				Danio				Danio rerio
VNNASLVGVGYTQSLRPGVK	Eukaryota	Metazoa			Chordata	Craniata	Actinopterygii	Actinopteri	Neopterygii	Teleostei	Cypriniphysae	Cypriniformes				Cyprinoidea	Cyprinidae				Danio				Danio rerio
VPEPDIMATNGVVHFVR	Eukaryota	Metazoa			Chordata	Craniata	Actinopterygii	Actinopteri	Neopterygii	Teleostei	Cypriniphysae	Cypriniformes				Cyprinoidea	Cyprinidae				Danio				Danio rerio
VQLELLSGLAEIFGSELNR	Eukaryota	Metazoa			Chordata	Craniata	Actinopterygii	Actinopteri	Neopterygii	Teleostei	Cypriniphysae	Cypriniformes				Cyprinoidea	Cyprinidae				Danio				Danio rerio
VSDTPVEFIVEHLLK	Eukaryota	Metazoa			Chordata	Craniata	Actinopterygii	Actinopteri	Neopterygii	Teleostei	Cypriniphysae	Cypriniformes				Cyprinoidea	Cyprinidae				Danio				Danio rerio
VSHGGLEEGKPVDLILSCVDNFEAR	Eukaryota	Metazoa			Chordata	Craniata	Actinopterygii	Actinopteri	Neopterygii	Teleostei	Cypriniphysae	Cypriniformes				Cyprinoidea	Cyprinidae				Danio				Danio rerio
VSQMENHSGFVCQIFK	Eukaryota	Metazoa			Chordata	Craniata	Actinopterygii	Actinopteri	Neopterygii	Teleostei	Cypriniphysae	Cypriniformes				Cyprinoidea	Cyprinidae				Danio				Danio rerio
VSQPIEGHAAGFGQFK	Eukaryota	Metazoa			Chordata	Craniata	Actinopterygii	Actinopteri	Neopterygii	Teleostei	Cypriniphysae	Cypriniformes				Cyprinoidea	Cyprinidae				Danio				Danio rerio
VTLEELIQEYSILMK	Eukaryota	Metazoa			Chordata	Craniata	Actinopterygii	Actinopteri	Neopterygii	Teleostei	Cypriniphysae	Cypriniformes				Cyprinoidea	Cyprinidae				Danio				Danio rerio
VTSLTSFPSFIPEITIGAHELDSTYYAFK	Eukaryota	Metazoa			Chordata	Craniata	Actinopterygii	Actinopteri	Neopterygii	Teleostei	Cypriniphysae	Cypriniformes				Cyprinoidea	Cyprinidae				Danio				Danio rerio
VTVFQQNQHYAENFIQSIISTVDPAQR	Eukaryota	Metazoa			Chordata	Craniata	Actinopterygii	Actinopteri	Neopterygii	Teleostei	Cypriniphysae	Cypriniformes				Cyprinoidea	Cyprinidae				Danio				Danio rerio
VVEDNPEDFNGWVYLLQYVEQENHLLGSR	Eukaryota	Metazoa			Chordata	Craniata	Actinopterygii	Actinopteri	Neopterygii	Teleostei	Cypriniphysae	Cypriniformes				Cyprinoidea	Cyprinidae				Danio				Danio rerio
VYDPTTSTLSVGWEHAEGPVIQYR	Eukaryota	Metazoa			Chordata	Craniata	Actinopterygii	Actinopteri	Neopterygii	Teleostei	Cypriniphysae	Cypriniformes				Cyprinoidea	Cyprinidae				Danio				Danio rerio
VYHSHTYATIQPR	Eukaryota	Metazoa			Chordata	Craniata	Actinopterygii	Actinopteri	Neopterygii	Teleostei	Cypriniphysae	Cypriniformes				Cyprinoidea	Cyprinidae				Danio				Danio rerio
VYNDQTVAQIMQVLTTVAHDDHSR	Eukaryota	Metazoa			Chordata	Craniata	Actinopterygii	Actinopteri	Neopterygii	Teleostei	Cypriniphysae	Cypriniformes				Cyprinoidea	Cyprinidae				Danio				Danio rerio
WPIDLFQTLLPR	Eukaryota	Metazoa			Chordata	Craniata	Actinopterygii	Actinopteri	Neopterygii	Teleostei	Cypriniphysae	Cypriniformes				Cyprinoidea	Cyprinidae				Danio				Danio rerio
YDGSTIVPGGHGSDYEEFK	Eukaryota	Metazoa			Chordata	Craniata	Actinopterygii	Actinopteri	Neopterygii	Teleostei	Cypriniphysae	Cypriniformes				Cyprinoidea	Cyprinidae				Danio				Danio rerio
YDLSSILAAAECTLHIASK	Eukaryota	Metazoa			Chordata	Craniata	Actinopterygii	Actinopteri	Neopterygii	Teleostei	Cypriniphysae	Cypriniformes				Cyprinoidea	Cyprinidae				Danio				Danio rerio
YGVDGECVLLFRPPR	Eukaryota	Metazoa			Chordata	Craniata	Actinopterygii	Actinopteri	Neopterygii	Teleostei	Cypriniphysae	Cypriniformes				Cyprinoidea	Cyprinidae				Danio				Danio rerio
YHLPVDLLSLELAK	Eukaryota	Metazoa			Chordata	Craniata	Actinopterygii	Actinopteri	Neopterygii	Teleostei	Cypriniphysae	Cypriniformes				Cyprinoidea	Cyprinidae				Danio				Danio rerio
YNHLQPGDHLTDVVLNLSGR	Eukaryota	Metazoa			Chordata	Craniata	Actinopterygii	Actinopteri	Neopterygii	Teleostei	Cypriniphysae	Cypriniformes				Cyprinoidea	Cyprinidae				Danio				Danio rerio
YQEVIHNLEFTR	Eukaryota	Metazoa			Chordata	Craniata	Actinopterygii	Actinopteri	Neopterygii	Teleostei	Cypriniphysae	Cypriniformes				Cyprinoidea	Cyprinidae				Danio				Danio rerio
YSSILNHIPSQPVSIR	Eukaryota	Metazoa			Chordata	Craniata	Actinopterygii	Actinopteri	Neopterygii	Teleostei	Cypriniphysae	Cypriniformes				Cyprinoidea	Cyprinidae				Danio				Danio rerio
YSTTGISELHNCQPFVVDTLHGK	Eukaryota	Metazoa			Chordata	Craniata	Actinopterygii	Actinopteri	Neopterygii	Teleostei	Cypriniphysae	Cypriniformes				Cyprinoidea	Cyprinidae				Danio				Danio rerio
YTITATNNIGTVTEEVAIIILDKPGPPTGPVK	Eukaryota	Metazoa			Chordata	Craniata	Actinopterygii	Actinopteri	Neopterygii	Teleostei	Cypriniphysae	Cypriniformes				Cyprinoidea	Cyprinidae				Danio				Danio rerio
YTPLEVAMATVTALR	Eukaryota	Metazoa			Chordata	Craniata	Actinopterygii	Actinopteri	Neopterygii	Teleostei	Cypriniphysae	Cypriniformes				Cyprinoidea	Cyprinidae				Danio				Danio rerio
YWPFYQQYGGQTFPK	Eukaryota	Metazoa			Chordata	Craniata	Actinopterygii	Actinopteri	Neopterygii	Teleostei	Cypriniphysae	Cypriniformes				Cyprinoidea	Cyprinidae				Danio				Danio rerio
YYEDFIFRPDDILIVTYPK	Eukaryota	Metazoa			Chordata	Craniata	Actinopterygii	Actinopteri	Neopterygii	Teleostei	Cypriniphysae	Cypriniformes				Cyprinoidea	Cyprinidae				Danio				Danio rerio
YYQHLYSVHLCDQPEDCTVQLADHIK	Eukaryota	Metazoa			Chordata	Craniata	Actinopterygii	Actinopteri	Neopterygii	Teleostei	Cypriniphysae	Cypriniformes				Cyprinoidea	Cyprinidae				Danio				Danio rerio
AAGFPLTDQLFQMIIR	Eukaryota	Metazoa			Chordata	Craniata	Actinopterygii	Actinopteri	Neopterygii	Teleostei	Cypriniphysae	Cypriniformes				Cyprinoidea	Cyprinidae				Danio				Danio rerio
AFVHQSLAVMHLPAEIGDYTDFYSSR	Eukaryota	Metazoa			Chordata	Craniata	Actinopterygii	Actinopteri	Neopterygii	Teleostei	Cypriniphysae	Cypriniformes				Cyprinoidea	Cyprinidae				Danio				Danio rerio
AKPSPVDPVIPSVSLGEPPLGFR	Eukaryota	Metazoa			Chordata	Craniata	Actinopterygii	Actinopteri	Neopterygii	Teleostei	Cypriniphysae	Cypriniformes				Cyprinoidea	Cyprinidae				Danio				Danio rerio
ANHVNVQSCAYTVTDLQEGCTCEFR	Eukaryota	Metazoa			Chordata	Craniata	Actinopterygii	Actinopteri	Neopterygii	Teleostei	Cypriniphysae	Cypriniformes				Cyprinoidea	Cyprinidae				Danio				Danio rerio
ANSDDGTYVHDFSLQLQPYSTSLK	Eukaryota	Metazoa			Chordata	Craniata	Actinopterygii	Actinopteri	Neopterygii	Teleostei	Cypriniphysae	Cypriniformes				Cyprinoidea	Cyprinidae				Danio				Danio rerio
APEVAHNLDFAR	Eukaryota	Metazoa			Chordata	Craniata	Actinopterygii	Actinopteri	Neopterygii	Teleostei	Cypriniphysae	Cypriniformes				Cyprinoidea	Cyprinidae				Danio				Danio rerio
DEDVAAALK	Eukaryota	Metazoa			Chordata	Craniata	Actinopterygii	Actinopteri	Neopterygii	Teleostei	Cypriniphysae	Cypriniformes				Cyprinoidea	Cyprinidae				Danio				Danio rerio
DETAFDAVK	Eukaryota	Metazoa			Chordata	Craniata	Actinopterygii	Actinopteri	Neopterygii	Teleostei	Cypriniphysae	Cypriniformes				Cyprinoidea	Cyprinidae				Danio				Danio rerio
DGAAFFFGPIFIHPEETEHEPTK	Eukaryota	Metazoa			Chordata	Craniata	Actinopterygii	Actinopteri	Neopterygii	Teleostei	Cypriniphysae	Cypriniformes				Cyprinoidea	Cyprinidae				Danio				Danio rerio
DHMVISWKPPLDDGGSEISNYIIEK	Eukaryota	Metazoa			Chordata	Craniata	Actinopterygii	Actinopteri	Neopterygii	Teleostei	Cypriniphysae	Cypriniformes				Cyprinoidea	Cyprinidae				Danio				Danio rerio
DICDFTNATKPASIQESLQTLVEVLSR	Eukaryota	Metazoa			Chordata	Craniata	Actinopterygii	Actinopteri	Neopterygii	Teleostei	Cypriniphysae	Cypriniformes				Cyprinoidea	Cyprinidae				Danio				Danio rerio
DLQTAFYELCWHAIQGSLK	Eukaryota	Metazoa			Chordata	Craniata	Actinopterygii	Actinopteri	Neopterygii	Teleostei	Cypriniphysae	Cypriniformes				Cyprinoidea	Cyprinidae				Danio				Danio rerio
DWILPADYDHAEAEAK	Eukaryota	Metazoa			Chordata	Craniata	Actinopterygii	Actinopteri	Neopterygii	Teleostei	Cypriniphysae	Cypriniformes				Cyprinoidea	Cyprinidae				Danio				Danio rerio
DYAFVHFNDR	Eukaryota	Metazoa			Chordata	Craniata	Actinopterygii	Actinopteri	Neopterygii	Teleostei	Cypriniphysae	Cypriniformes				Cyprinoidea	Cyprinidae				Danio				Danio rerio
EAFDDAIGHLDNLNEDSYK	Eukaryota	Metazoa			Chordata	Craniata	Actinopterygii	Actinopteri	Neopterygii	Teleostei	Cypriniphysae	Cypriniformes				Cyprinoidea	Cyprinidae				Danio				Danio rerio
EEEAIQLDGLNTSQLK	Eukaryota	Metazoa			Chordata	Craniata	Actinopterygii	Actinopteri	Neopterygii	Teleostei	Cypriniphysae	Cypriniformes				Cyprinoidea	Cyprinidae				Danio				Danio rerio
EHISEFTSEANK	Eukaryota	Metazoa			Chordata	Craniata	Actinopterygii	Actinopteri	Neopterygii	Teleostei	Cypriniphysae	Cypriniformes				Cyprinoidea	Cyprinidae				Danio				Danio rerio
ELEAMTDLK	Eukaryota	Metazoa			Chordata	Craniata	Actinopterygii	Actinopteri	Neopterygii	Teleostei	Cypriniphysae	Cypriniformes				Cyprinoidea	Cyprinidae				Danio				Danio rerio
EVDLEQYFQNPLPLHCTTK	Eukaryota	Metazoa			Chordata	Craniata	Actinopterygii	Actinopteri	Neopterygii	Teleostei	Cypriniphysae	Cypriniformes				Cyprinoidea	Cyprinidae				Danio				Danio rerio
FEMEGFNSLLGSHNDK	Eukaryota	Metazoa			Chordata	Craniata	Actinopterygii	Actinopteri	Neopterygii	Teleostei	Cypriniphysae	Cypriniformes				Cyprinoidea	Cyprinidae				Danio				Danio rerio
FNDEHIPDSPFVVPVASPSDDAR	Eukaryota	Metazoa			Chordata	Craniata	Actinopterygii	Actinopteri	Neopterygii	Teleostei	Cypriniphysae	Cypriniformes				Cyprinoidea	Cyprinidae				Danio				Danio rerio
FNLAGEHAGVWYLDLK	Eukaryota	Metazoa			Chordata	Craniata	Actinopterygii	Actinopteri	Neopterygii	Teleostei	Cypriniphysae	Cypriniformes				Cyprinoidea	Cyprinidae				Danio				Danio rerio
GGEFFAHMTSWGLK	Eukaryota	Metazoa			Chordata	Craniata	Actinopterygii	Actinopteri	Neopterygii	Teleostei	Cypriniphysae	Cypriniformes				Cyprinoidea	Cyprinidae				Danio				Danio rerio
GIESLSVEALGALDGDLK	Eukaryota	Metazoa			Chordata	Craniata	Actinopterygii	Actinopteri	Neopterygii	Teleostei	Cypriniphysae	Cypriniformes				Cyprinoidea	Cyprinidae				Danio				Danio rerio
GQYFSFLEEYGTHFTK	Eukaryota	Metazoa			Chordata	Craniata	Actinopterygii	Actinopteri	Neopterygii	Teleostei	Cypriniphysae	Cypriniformes				Cyprinoidea	Cyprinidae				Danio				Danio rerio
GQYMVVHDTPQILHAK	Eukaryota	Metazoa			Chordata	Craniata	Actinopterygii	Actinopteri	Neopterygii	Teleostei	Cypriniphysae	Cypriniformes				Cyprinoidea	Cyprinidae				Danio				Danio rerio
GRPEAHFALVHYAGTVDYNISNWLVK	Eukaryota	Metazoa			Chordata	Craniata	Actinopterygii	Actinopteri	Neopterygii	Teleostei	Cypriniphysae	Cypriniformes				Cyprinoidea	Cyprinidae				Danio				Danio rerio
GYAFVQFAQER	Eukaryota	Metazoa			Chordata	Craniata	Actinopterygii	Actinopteri	Neopterygii	Teleostei	Cypriniphysae	Cypriniformes				Cyprinoidea	Cyprinidae				Danio				Danio rerio
HAVEADISGLR	Eukaryota	Metazoa			Chordata	Craniata	Actinopterygii	Actinopteri	Neopterygii	Teleostei	Cypriniphysae	Cypriniformes				Cyprinoidea	Cyprinidae				Danio				Danio rerio
HEYFYETESLNSLNK	Eukaryota	Metazoa			Chordata	Craniata	Actinopterygii	Actinopteri	Neopterygii	Teleostei	Cypriniphysae	Cypriniformes				Cyprinoidea	Cyprinidae				Danio				Danio rerio
HGAETIDSPVFELK	Eukaryota	Metazoa			Chordata	Craniata	Actinopterygii	Actinopteri	Neopterygii	Teleostei	Cypriniphysae	Cypriniformes				Cyprinoidea	Cyprinidae				Danio				Danio rerio
HGAQQLCGILGVSPSELSEGGEDGGFWDALGGK	Eukaryota	Metazoa			Chordata	Craniata	Actinopterygii	Actinopteri	Neopterygii	Teleostei	Cypriniphysae	Cypriniformes				Cyprinoidea	Cyprinidae				Danio				Danio rerio
HGEFEFISGTK	Eukaryota	Metazoa			Chordata	Craniata	Actinopterygii	Actinopteri	Neopterygii	Teleostei	Cypriniphysae	Cypriniformes				Cyprinoidea	Cyprinidae				Danio				Danio rerio
HGTGEAFINLDVIDVPGPVK	Eukaryota	Metazoa			Chordata	Craniata	Actinopterygii	Actinopteri	Neopterygii	Teleostei	Cypriniphysae	Cypriniformes				Cyprinoidea	Cyprinidae				Danio				Danio rerio
HLLGGEVDHSHTTGSSTAHDHTK	Eukaryota	Metazoa			Chordata	Craniata	Actinopterygii	Actinopteri	Neopterygii	Teleostei	Cypriniphysae	Cypriniformes				Cyprinoidea	Cyprinidae				Danio				Danio rerio
HILGLNIAEYMR	Eukaryota	Metazoa			Chordata	Craniata	Actinopterygii	Actinopteri	Neopterygii	Teleostei	Cypriniphysae	Cypriniformes				Cyprinoidea	Cyprinidae				Danio				Danio rerio
HWNEYDQNK	Eukaryota	Metazoa			Chordata	Craniata	Actinopterygii	Actinopteri	Neopterygii	Teleostei	Cypriniphysae	Cypriniformes				Cyprinoidea	Cyprinidae				Danio				Danio rerio
KPPTFTDASIIATELLNSGYEFDQGSIVYNR	Eukaryota	Metazoa			Chordata	Craniata	Actinopterygii	Actinopteri	Neopterygii	Teleostei	Cypriniphysae	Cypriniformes				Cyprinoidea	Cyprinidae				Danio				Danio rerio
LDFTQDQMEDYR	Eukaryota	Metazoa			Chordata	Craniata	Actinopterygii	Actinopteri	Neopterygii	Teleostei	Cypriniphysae	Cypriniformes				Cyprinoidea	Cyprinidae				Danio				Danio rerio
IDGNELDLSLSNLTEVPVK	Eukaryota	Metazoa			Chordata	Craniata	Actinopterygii	Actinopteri	Neopterygii	Teleostei	Cypriniphysae	Cypriniformes				Cyprinoidea	Cyprinidae				Danio				Danio rerio
IEAIWSQFK	Eukaryota	Metazoa			Chordata	Craniata	Actinopterygii	Actinopteri	Neopterygii	Teleostei	Cypriniphysae	Cypriniformes				Cyprinoidea	Cyprinidae				Danio				Danio rerio
LEFEVQVGPR	Eukaryota	Metazoa			Chordata	Craniata	Actinopterygii	Actinopteri	Neopterygii	Teleostei	Cypriniphysae	Cypriniformes				Cyprinoidea	Cyprinidae				Danio				Danio rerio
IEGDAIVCAAYSHELPK	Eukaryota	Metazoa			Chordata	Craniata	Actinopterygii	Actinopteri	Neopterygii	Teleostei	Cypriniphysae	Cypriniformes				Cyprinoidea	Cyprinidae				Danio				Danio rerio
LGIHASSFNGYILGEHGDTSVPVWSGANVAGVSLQK	Eukaryota	Metazoa			Chordata	Craniata	Actinopterygii	Actinopteri	Neopterygii	Teleostei	Cypriniphysae	Cypriniformes				Cyprinoidea	Cyprinidae				Danio				Danio rerio
IHESAGLPFFEVFVNAPLEVCESR	Eukaryota	Metazoa			Chordata	Craniata	Actinopterygii	Actinopteri	Neopterygii	Teleostei	Cypriniphysae	Cypriniformes				Cyprinoidea	Cyprinidae				Danio				Danio rerio
ILHATGVNAGIYLHIDNAK	Eukaryota	Metazoa			Chordata	Craniata	Actinopterygii	Actinopteri	Neopterygii	Teleostei	Cypriniphysae	Cypriniformes				Cyprinoidea	Cyprinidae				Danio				Danio rerio
LISLLPEYVVPYAIHLLVHDPDYVK	Eukaryota	Metazoa			Chordata	Craniata	Actinopterygii	Actinopteri	Neopterygii	Teleostei	Cypriniphysae	Cypriniformes				Cyprinoidea	Cyprinidae				Danio				Danio rerio
IITTEEIIAIILK	Eukaryota	Metazoa			Chordata	Craniata	Actinopterygii	Actinopteri	Neopterygii	Teleostei	Cypriniphysae	Cypriniformes				Cyprinoidea	Cyprinidae				Danio				Danio rerio
ILVTGGGGYIGSHCVVELIEAGFHPVVIDNFSNAVR	Eukaryota	Metazoa			Chordata	Craniata	Actinopterygii	Actinopteri	Neopterygii	Teleostei	Cypriniphysae	Cypriniformes				Cyprinoidea	Cyprinidae				Danio				Danio rerio
LPSSPYDISLLYCDGESMVLNWK	Eukaryota	Metazoa			Chordata	Craniata	Actinopterygii	Actinopteri	Neopterygii	Teleostei	Cypriniphysae	Cypriniformes				Cyprinoidea	Cyprinidae				Danio				Danio rerio
ISASLAWDKPEDDGGSR	Eukaryota	Metazoa			Chordata	Craniata	Actinopterygii	Actinopteri	Neopterygii	Teleostei	Cypriniphysae	Cypriniformes				Cyprinoidea	Cyprinidae				Danio				Danio rerio
LSPIFISVNYSLADSQNAVLHGQSVAVGQTR	Eukaryota	Metazoa			Chordata	Craniata	Actinopterygii	Actinopteri	Neopterygii	Teleostei	Cypriniphysae	Cypriniformes				Cyprinoidea	Cyprinidae				Danio				Danio rerio
ISVAGVTSGNVEYLAHAIHQVTK	Eukaryota	Metazoa			Chordata	Craniata	Actinopterygii	Actinopteri	Neopterygii	Teleostei	Cypriniphysae	Cypriniformes				Cyprinoidea	Cyprinidae				Danio				Danio rerio
ITQLQNLDGLHNLTVLSIQSNR	Eukaryota	Metazoa			Chordata	Craniata	Actinopterygii	Actinopteri	Neopterygii	Teleostei	Cypriniphysae	Cypriniformes				Cyprinoidea	Cyprinidae				Danio				Danio rerio
IVSYHTSGCDPSIMGIGPVPAITEALK	Eukaryota	Metazoa			Chordata	Craniata	Actinopterygii	Actinopteri	Neopterygii	Teleostei	Cypriniphysae	Cypriniformes				Cyprinoidea	Cyprinidae				Danio				Danio rerio
NATIHNANILLQIDNSK	Eukaryota	Metazoa			Chordata	Craniata	Actinopterygii	Actinopteri	Neopterygii	Teleostei	Cypriniphysae	Cypriniformes				Cyprinoidea	Cyprinidae				Danio				Danio rerio
QAGEVTFADAHRPNLNEGVVEFASHSDLK	Eukaryota	Metazoa			Chordata	Craniata	Actinopterygii	Actinopteri	Neopterygii	Teleostei	Cypriniphysae	Cypriniformes				Cyprinoidea	Cyprinidae				Danio				Danio rerio
QDIITTNSK	Eukaryota	Metazoa			Chordata	Craniata	Actinopterygii	Actinopteri	Neopterygii	Teleostei	Cypriniphysae	Cypriniformes				Cyprinoidea	Cyprinidae				Danio				Danio rerio
QENVLADTHIYYLR	Eukaryota	Metazoa			Chordata	Craniata	Actinopterygii	Actinopteri	Neopterygii	Teleostei	Cypriniphysae	Cypriniformes				Cyprinoidea	Cyprinidae				Danio				Danio rerio
QGPHFVEYLGYEVTPECCVR	Eukaryota	Metazoa			Chordata	Craniata	Actinopterygii	Actinopteri	Neopterygii	Teleostei	Cypriniphysae	Cypriniformes				Cyprinoidea	Cyprinidae				Danio				Danio rerio
QLSEVWDQLEQANLELHTFMELK	Eukaryota	Metazoa			Chordata	Craniata	Actinopterygii	Actinopteri	Neopterygii	Teleostei	Cypriniphysae	Cypriniformes				Cyprinoidea	Cyprinidae				Danio				Danio rerio
RPSLMAAMMAEELK	Eukaryota	Metazoa			Chordata	Craniata	Actinopterygii	Actinopteri	Neopterygii	Teleostei	Cypriniphysae	Cypriniformes				Cyprinoidea	Cyprinidae				Danio				Danio rerio
SDGLYDPLEYENHPELYTSHFR	Eukaryota	Metazoa			Chordata	Craniata	Actinopterygii	Actinopteri	Neopterygii	Teleostei	Cypriniphysae	Cypriniformes				Cyprinoidea	Cyprinidae				Danio				Danio rerio
SEFGEHEEIALAHNR	Eukaryota	Metazoa			Chordata	Craniata	Actinopterygii	Actinopteri	Neopterygii	Teleostei	Cypriniphysae	Cypriniformes				Cyprinoidea	Cyprinidae				Danio				Danio rerio
SLQDVQIWFQPNQGDSSSLFMPQSGSQDGFSFSDPLADLNVEAMSSDK	Eukaryota	Metazoa			Chordata	Craniata	Actinopterygii	Actinopteri	Neopterygii	Teleostei	Cypriniphysae	Cypriniformes				Cyprinoidea	Cyprinidae				Danio				Danio rerio
SLTHLDDTEFK	Eukaryota	Metazoa			Chordata	Craniata	Actinopterygii	Actinopteri	Neopterygii	Teleostei	Cypriniphysae	Cypriniformes				Cyprinoidea	Cyprinidae				Danio				Danio rerio
SVSGLEETFHR	Eukaryota	Metazoa			Chordata	Craniata	Actinopterygii	Actinopteri	Neopterygii	Teleostei	Cypriniphysae	Cypriniformes				Cyprinoidea	Cyprinidae				Danio				Danio rerio
TIIEEAIPMATGPKPR	Eukaryota	Metazoa			Chordata	Craniata	Actinopterygii	Actinopteri	Neopterygii	Teleostei	Cypriniphysae	Cypriniformes				Cyprinoidea	Cyprinidae				Danio				Danio rerio
TPFLLSGTTYSDLMPHDLAR	Eukaryota	Metazoa			Chordata	Craniata	Actinopterygii	Actinopteri	Neopterygii	Teleostei	Cypriniphysae	Cypriniformes				Cyprinoidea	Cyprinidae				Danio				Danio rerio
TSVHIMPNTPAIELSR	Eukaryota	Metazoa			Chordata	Craniata	Actinopterygii	Actinopteri	Neopterygii	Teleostei	Cypriniphysae	Cypriniformes				Cyprinoidea	Cyprinidae				Danio				Danio rerio
TTQSFYELIELGIHGLCQSSYTVDEDSNAK	Eukaryota	Metazoa			Chordata	Craniata	Actinopterygii	Actinopteri	Neopterygii	Teleostei	Cypriniphysae	Cypriniformes				Cyprinoidea	Cyprinidae				Danio				Danio rerio
TVPEPEAIKPEILEILVNSISINSAYTTK	Eukaryota	Metazoa			Chordata	Craniata	Actinopterygii	Actinopteri	Neopterygii	Teleostei	Cypriniphysae	Cypriniformes				Cyprinoidea	Cyprinidae				Danio				Danio rerio
TWADDWLVHLISPNVYR	Eukaryota	Metazoa			Chordata	Craniata	Actinopterygii	Actinopteri	Neopterygii	Teleostei	Cypriniphysae	Cypriniformes				Cyprinoidea	Cyprinidae				Danio				Danio rerio
VGLWNVPYVSHIFLIK	Eukaryota	Metazoa			Chordata	Craniata	Actinopterygii	Actinopteri	Neopterygii	Teleostei	Cypriniphysae	Cypriniformes				Cyprinoidea	Cyprinidae				Danio				Danio rerio
VKPASDETAFSECLLK	Eukaryota	Metazoa			Chordata	Craniata	Actinopterygii	Actinopteri	Neopterygii	Teleostei	Cypriniphysae	Cypriniformes				Cyprinoidea	Cyprinidae				Danio				Danio rerio
VLATQTDHQTGGESFTQELAQHLAAEFK	Eukaryota	Metazoa			Chordata	Craniata	Actinopterygii	Actinopteri	Neopterygii	Teleostei	Cypriniphysae	Cypriniformes				Cyprinoidea	Cyprinidae				Danio				Danio rerio
VIFPGLPSHPQHELTK	Eukaryota	Metazoa			Chordata	Craniata	Actinopterygii	Actinopteri	Neopterygii	Teleostei	Cypriniphysae	Cypriniformes				Cyprinoidea	Cyprinidae				Danio				Danio rerio
VNVPVVGGHAGITIIPLISQCTPK	Eukaryota	Metazoa			Chordata	Craniata	Actinopterygii	Actinopteri	Neopterygii	Teleostei	Cypriniphysae	Cypriniformes				Cyprinoidea	Cyprinidae				Danio				Danio rerio
VQALTTDVSLILQALK	Eukaryota	Metazoa			Chordata	Craniata	Actinopterygii	Actinopteri	Neopterygii	Teleostei	Cypriniphysae	Cypriniformes				Cyprinoidea	Cyprinidae				Danio				Danio rerio
VYAELTVTHTQPGEFLLITGSGSELHDLR	Eukaryota	Metazoa			Chordata	Craniata	Actinopterygii	Actinopteri	Neopterygii	Teleostei	Cypriniphysae	Cypriniformes				Cyprinoidea	Cyprinidae				Danio				Danio rerio
WEMQQYAR	Eukaryota	Metazoa			Chordata	Craniata	Actinopterygii	Actinopteri	Neopterygii	Teleostei	Cypriniphysae	Cypriniformes				Cyprinoidea	Cyprinidae				Danio				Danio rerio
WHDGLFEELESLVK	Eukaryota	Metazoa			Chordata	Craniata	Actinopterygii	Actinopteri	Neopterygii	Teleostei	Cypriniphysae	Cypriniformes				Cyprinoidea	Cyprinidae				Danio				Danio rerio
WSTLACNIALDAVR	Eukaryota	Metazoa			Chordata	Craniata	Actinopterygii	Actinopteri	Neopterygii	Teleostei	Cypriniphysae	Cypriniformes				Cyprinoidea	Cyprinidae				Danio				Danio rerio
YANMLNGYQFQVGSMEEQLIQLR	Eukaryota	Metazoa			Chordata	Craniata	Actinopterygii	Actinopteri	Neopterygii	Teleostei	Cypriniphysae	Cypriniformes				Cyprinoidea	Cyprinidae				Danio				Danio rerio
YHFGQPYYTITLPLPLGGK	Eukaryota	Metazoa			Chordata	Craniata	Actinopterygii	Actinopteri	Neopterygii	Teleostei	Cypriniphysae	Cypriniformes				Cyprinoidea	Cyprinidae				Danio				Danio rerio
AAEFSK
AAVPSGASTGVHEALELR
APYGAR
AVEDELR
CGWLDLVILK
DDLNWLK
DEIAVK
DEVLK
DIDFLSEK
DLIDDLK
DMTDK
DPEAPIFQVADYGLVADLFK
DPEEIEK
DPETVR
DPLQK
DQMEK
DSIFFIR
DWIVFK
EAELDK
EAFPGDIFYIHSR
EDFVK
ELANMK
ELATMK
EIESK
ELVDK
EPIEVEER
EVHELER
EYISIYK
FICVR
FTEDVK
FYIFK
GFLSR
GLVVPVIR
GIWHNENK
GVLER
HLQLAIR
LDQIR
LEWEWER
LLLLAGIDR
ILQDQLNK
IPDGDK
LPEGDLGK
LPLEK
IQAQDR
LSTLDK
LVLEVAQHLGENVVR
MLTDR
NVDILK
QEALK
QEYDESGPSIVHR
QHIADK
QVLINLLNNAIK
SAETEK
SLPIK
SLVPIK
SNIDK
STLDK
TIQFVDWCPTGFK
TSFFQALGITTK
TVTAMDVVYALK
VAPEEHPVLLTEAPLNPK
VDESEQR
VDFDDIQK
VDLSK
VELEAK
VFWDDK
VPTPNVSVVDLTVR
WEAVK
YDGLR
YDLNDK
YELTGK
YLESR
YVGSMVADVHR
YYVTIIDAPGHR
AHGGYSVFAGVGER
AIVAK
AVETEK
CHDANK
DADETK
DAFEISK
DAQEK
DDLAGK
DDIEEK
DHYDIK
DLFPLDK
DLQGLR
DQFAK
DTIAR
DVLLFIDNIFR
DVLSLK
DVIVDLLCYR
DVNFGWLIR
DVYFLK
DYGVLK
EAESK
EAFDR
EAVQK
EDEGIAYR
EEAEALIK
EELIFLK
EEVFK
EIDDPK
ELISNSSDALDK
ELTAGDR
ELYVK
EPIICK
EWIEEK
FIELQK
FVIGGPQGDAGLTGR
GELAVK
HVLNLEAVNTYEGTHDIHALILGR
HVVFIAQR
IAEQVGIDK
LALPFTDIAAGAPVLQVDGLR
LDLYYK
LDSGK
LDYILGLK
LEAHIK
IEELPGR
LEVEWER
IFVGGLK
LLDIVAR
ILTLK
ISGLIYEETR
ITVDVLEK
IWHHTFYNELR
LWMPILQK
NAEFDR
NEFWSALLEK
NILGGTVFR
NTYEIK
QAGEGAR
SEGNTK
SEPEK
SETDK
SIYGDR
SLYSEK
SQVAMR
STLADK
SYVEAWEK
TEPNR
TFIAVKPDGVQR
TGLFGGAGVGK
TVIIMELINNVAK
VILHLK
VIPGFMCQGGDFTNHNGTGGK
VPMNK
WEVTEAR
WTFGDK
YDSTHGR
YEEEIK
YSEALK
ALHPEVR
AIIDILAYR
ATEDELDK
DECPEVR
DEEGQDVLLFIDNIFR
DIDIVELLR
DIFQDIFEK
DIFQEIYDK
DLYANNVLSGGTTMYPGIADR
DVFSK
DVGSK
DVVEELK
EDPDILCLQETK
EIPNSLR
ELTMTR
EQETSR
ETLEEDIK
EYALK
FEIAK
HIEVQILGDK
HYFQNTQGLIFVVDSNDR
LCIPHLLK
LDISNVK
LEEDLNK
LELAEK
LENELK
LFLQNFK
IGGIGTVPVGR
IINEPTAAAIAYGLDK
IINTASMASLIVPHPQK
ILQLLGLR
IVADK
MYQGR
NAPAIIFIDELDAIAPK
NGAVIDK
NLFPDK
NISFTVWDVGGQDK
QQSEEK
QSVEADIAGLR
SADEVK
SDAADK
SDLEMQIEGLK
SETLK
SGTPR
SGTYR
SPYGGR
TAIAIDTIINQK
THINIVVIGHVDSGK
TNVNGGAIAIGHPLGASGTR
TYVYK
VAIQLNDTHPALAIPELMR
VNTLTK
WTEVAR
WVILGHSER
YGVIILDEAHER
AGILK
DAVLLVFANK
DDAWLK
DFDELK
DYFSK
EELESFR
FYGDAEK
GDVSSR
GHGGYSVFAGVGER
ILAGDK
IIVDELR
LQTPIK
LSAGK
NDEELNK
NELER
QLEALSK
QLFHPEQLISGK
VTLDK
AAELFHQLSQALEVLTDAAAK	Eukaryota	Metazoa			Chordata	Craniata	Actinopterygii	Actinopteri	Neopterygii	Teleostei
ADELSFPLSVVEFLQGHIGIPHGGFPEPFR	Eukaryota	Metazoa			Chordata	Craniata	Actinopterygii	Actinopteri	Neopterygii	Teleostei
AEAEMWYK	Eukaryota	Metazoa			Chordata	Craniata	Actinopterygii	Actinopteri	Neopterygii	Teleostei
AGEVLGDLFEVSTIR	Eukaryota	Metazoa			Chordata	Craniata	Actinopterygii	Actinopteri	Neopterygii	Teleostei
ALIPNVPFQMLLR	Eukaryota	Metazoa			Chordata	Craniata	Actinopterygii	Actinopteri	Neopterygii	Teleostei
ATASILHNLSHQR	Eukaryota	Metazoa			Chordata	Craniata	Actinopterygii	Actinopteri	Neopterygii	Teleostei
CNPIEGMLSHQLK	Eukaryota	Metazoa			Chordata	Craniata	Actinopterygii	Actinopteri	Neopterygii	Teleostei
CSLHESWTTGK	Eukaryota	Metazoa			Chordata	Craniata	Actinopterygii	Actinopteri	Neopterygii	Teleostei
CTACSPIVLENYER	Eukaryota	Metazoa			Chordata	Craniata	Actinopterygii	Actinopteri	Neopterygii	Teleostei
DAIYTIQYNVR	Eukaryota	Metazoa			Chordata	Craniata	Actinopterygii	Actinopteri	Neopterygii	Teleostei
DASDQHIIDVVLK	Eukaryota	Metazoa			Chordata	Craniata	Actinopterygii	Actinopteri	Neopterygii	Teleostei
DGNPVDVQVK	Eukaryota	Metazoa			Chordata	Craniata	Actinopterygii	Actinopteri	Neopterygii	Teleostei
DIENILISPVVVASSLGLVALGGK	Eukaryota	Metazoa			Chordata	Craniata	Actinopterygii	Actinopteri	Neopterygii	Teleostei
DLMNQVFSVIANSSTPLK	Eukaryota	Metazoa			Chordata	Craniata	Actinopterygii	Actinopteri	Neopterygii	Teleostei
DLVELQALIDAHFEHR	Eukaryota	Metazoa			Chordata	Craniata	Actinopterygii	Actinopteri	Neopterygii	Teleostei
DLVGIISIPLK	Eukaryota	Metazoa			Chordata	Craniata	Actinopterygii	Actinopteri	Neopterygii	Teleostei
DQTDDQVTIDSAIATK	Eukaryota	Metazoa			Chordata	Craniata	Actinopterygii	Actinopteri	Neopterygii	Teleostei
EGNASGTTLLDALDAILPPSRPTDKPLR	Eukaryota	Metazoa			Chordata	Craniata	Actinopterygii	Actinopteri	Neopterygii	Teleostei
EHWNPAISALIYNVLK	Eukaryota	Metazoa			Chordata	Craniata	Actinopterygii	Actinopteri	Neopterygii	Teleostei
EIASDPVEK	Eukaryota	Metazoa			Chordata	Craniata	Actinopterygii	Actinopteri	Neopterygii	Teleostei
ELDAHTGYLSCCR	Eukaryota	Metazoa			Chordata	Craniata	Actinopterygii	Actinopteri	Neopterygii	Teleostei
ELKPGEEYTWK	Eukaryota	Metazoa			Chordata	Craniata	Actinopterygii	Actinopteri	Neopterygii	Teleostei
EILGYWIEFR	Eukaryota	Metazoa			Chordata	Craniata	Actinopterygii	Actinopteri	Neopterygii	Teleostei
ENSTLNCAAFTGGIVEAILTHSGFPAK	Eukaryota	Metazoa			Chordata	Craniata	Actinopterygii	Actinopteri	Neopterygii	Teleostei
EQEQLIADHFLFDKPVSPLLLAAGMAR	Eukaryota	Metazoa			Chordata	Craniata	Actinopterygii	Actinopteri	Neopterygii	Teleostei
EQHIIYTWQGLK	Eukaryota	Metazoa			Chordata	Craniata	Actinopterygii	Actinopteri	Neopterygii	Teleostei
ESEIIDFFLGSALK	Eukaryota	Metazoa			Chordata	Craniata	Actinopterygii	Actinopteri	Neopterygii	Teleostei
EWFTVYEHNR	Eukaryota	Metazoa			Chordata	Craniata	Actinopterygii	Actinopteri	Neopterygii	Teleostei
FEVEISEDDVHGQWK	Eukaryota	Metazoa			Chordata	Craniata	Actinopterygii	Actinopteri	Neopterygii	Teleostei
FEYANGVVGK	Eukaryota	Metazoa			Chordata	Craniata	Actinopterygii	Actinopteri	Neopterygii	Teleostei
FGIGGFLQSEVVECK	Eukaryota	Metazoa			Chordata	Craniata	Actinopterygii	Actinopteri	Neopterygii	Teleostei
FWEVISDEHGIDPTGSYHGDSDLQLDR	Eukaryota	Metazoa			Chordata	Craniata	Actinopterygii	Actinopteri	Neopterygii	Teleostei
GADAATASVLTFLDSHCECNEHWLEPLLER	Eukaryota	Metazoa			Chordata	Craniata	Actinopterygii	Actinopteri	Neopterygii	Teleostei
GHVFEESQVMGTPMFVVK	Eukaryota	Metazoa			Chordata	Craniata	Actinopterygii	Actinopteri	Neopterygii	Teleostei
GIAFPTCVSVNNCVCHFSPLK	Eukaryota	Metazoa			Chordata	Craniata	Actinopterygii	Actinopteri	Neopterygii	Teleostei
GLLEGFEYEFR	Eukaryota	Metazoa			Chordata	Craniata	Actinopterygii	Actinopteri	Neopterygii	Teleostei
GIISALAVPLLEEDR	Eukaryota	Metazoa			Chordata	Craniata	Actinopterygii	Actinopteri	Neopterygii	Teleostei
GTYDDYVEGLR	Eukaryota	Metazoa			Chordata	Craniata	Actinopterygii	Actinopteri	Neopterygii	Teleostei
HAAIYPSEDELQAIQK	Eukaryota	Metazoa			Chordata	Craniata	Actinopterygii	Actinopteri	Neopterygii	Teleostei
HELLQPFSVLNEK	Eukaryota	Metazoa			Chordata	Craniata	Actinopterygii	Actinopteri	Neopterygii	Teleostei
HITSYGESCPGLEQYAIK	Eukaryota	Metazoa			Chordata	Craniata	Actinopterygii	Actinopteri	Neopterygii	Teleostei
HNQETGDNVGPLIIK	Eukaryota	Metazoa			Chordata	Craniata	Actinopterygii	Actinopteri	Neopterygii	Teleostei
HPDADSLYVEQVDVGEAAPR	Eukaryota	Metazoa			Chordata	Craniata	Actinopterygii	Actinopteri	Neopterygii	Teleostei
HSMGVNWEPWK	Eukaryota	Metazoa			Chordata	Craniata	Actinopterygii	Actinopteri	Neopterygii	Teleostei
HTGAGCLSMANAGPNTNGSQFFICTALTSWLDGK	Eukaryota	Metazoa			Chordata	Craniata	Actinopterygii	Actinopteri	Neopterygii	Teleostei
LAEQELMDVSER	Eukaryota	Metazoa			Chordata	Craniata	Actinopterygii	Actinopteri	Neopterygii	Teleostei
IAYLLGLNSADMLK	Eukaryota	Metazoa			Chordata	Craniata	Actinopterygii	Actinopteri	Neopterygii	Teleostei
LDLQWVQVLAEGWASPLK	Eukaryota	Metazoa			Chordata	Craniata	Actinopterygii	Actinopteri	Neopterygii	Teleostei
LEGDHQLSQEGLIFDNK	Eukaryota	Metazoa			Chordata	Craniata	Actinopterygii	Actinopteri	Neopterygii	Teleostei
LETDLVQIQSEVEDTVQEAR	Eukaryota	Metazoa			Chordata	Craniata	Actinopterygii	Actinopteri	Neopterygii	Teleostei
IFDFQGMQHQIAHVATQLEAAR	Eukaryota	Metazoa			Chordata	Craniata	Actinopterygii	Actinopteri	Neopterygii	Teleostei
IGAPALLLYIDAK	Eukaryota	Metazoa			Chordata	Craniata	Actinopterygii	Actinopteri	Neopterygii	Teleostei
LGFYGLEESDLDK	Eukaryota	Metazoa			Chordata	Craniata	Actinopterygii	Actinopteri	Neopterygii	Teleostei
LIEGHEYEFR	Eukaryota	Metazoa			Chordata	Craniata	Actinopterygii	Actinopteri	Neopterygii	Teleostei
LIKPPIQVYGVEGR	Eukaryota	Metazoa			Chordata	Craniata	Actinopterygii	Actinopteri	Neopterygii	Teleostei
LLPLPLSLALGAFLNHR	Eukaryota	Metazoa			Chordata	Craniata	Actinopterygii	Actinopteri	Neopterygii	Teleostei
LISDILSEVVVPDVR	Eukaryota	Metazoa			Chordata	Craniata	Actinopterygii	Actinopteri	Neopterygii	Teleostei
LITDHPPQLTPGIR	Eukaryota	Metazoa			Chordata	Craniata	Actinopterygii	Actinopteri	Neopterygii	Teleostei
LQANQVEIHEDFIQSCFDR	Eukaryota	Metazoa			Chordata	Craniata	Actinopterygii	Actinopteri	Neopterygii	Teleostei
IQEEYYIHLIADNLPVATR	Eukaryota	Metazoa			Chordata	Craniata	Actinopterygii	Actinopteri	Neopterygii	Teleostei
LSDIYSTTIPSVDSAVESWDGSAIDATFSTQAPTGFQASGYSFHSHEWR	Eukaryota	Metazoa			Chordata	Craniata	Actinopterygii	Actinopteri	Neopterygii	Teleostei
LTGHHETSNIHEFSAGVANR	Eukaryota	Metazoa			Chordata	Craniata	Actinopterygii	Actinopteri	Neopterygii	Teleostei
LTGHQALVNEVLFSPDTR	Eukaryota	Metazoa			Chordata	Craniata	Actinopterygii	Actinopteri	Neopterygii	Teleostei
ITSYLIDALEK	Eukaryota	Metazoa			Chordata	Craniata	Actinopterygii	Actinopteri	Neopterygii	Teleostei
LVVNNIAGIEEVNMIK	Eukaryota	Metazoa			Chordata	Craniata	Actinopterygii	Actinopteri	Neopterygii	Teleostei
LYDILGVSPSASENELK	Eukaryota	Metazoa			Chordata	Craniata	Actinopterygii	Actinopteri	Neopterygii	Teleostei
MGLVFDDVVGIVEVINCR	Eukaryota	Metazoa			Chordata	Craniata	Actinopterygii	Actinopteri	Neopterygii	Teleostei
MLVAELNQLR	Eukaryota	Metazoa			Chordata	Craniata	Actinopterygii	Actinopteri	Neopterygii	Teleostei
NSLVNYIEQVHR	Eukaryota	Metazoa			Chordata	Craniata	Actinopterygii	Actinopteri	Neopterygii	Teleostei
NTITWLENELNR	Eukaryota	Metazoa			Chordata	Craniata	Actinopterygii	Actinopteri	Neopterygii	Teleostei
NWISSLQAVALSSDAFFPFR	Eukaryota	Metazoa			Chordata	Craniata	Actinopterygii	Actinopteri	Neopterygii	Teleostei
QFSFTHICAGASAFGK	Eukaryota	Metazoa			Chordata	Craniata	Actinopterygii	Actinopteri	Neopterygii	Teleostei
QLKPYVEEGLHPQTIIR	Eukaryota	Metazoa			Chordata	Craniata	Actinopterygii	Actinopteri	Neopterygii	Teleostei
SDHDQIIATLR	Eukaryota	Metazoa			Chordata	Craniata	Actinopterygii	Actinopteri	Neopterygii	Teleostei
SHILMFVPK	Eukaryota	Metazoa			Chordata	Craniata	Actinopterygii	Actinopteri	Neopterygii	Teleostei
SLAPSIYGSDDLK	Eukaryota	Metazoa			Chordata	Craniata	Actinopterygii	Actinopteri	Neopterygii	Teleostei
SLYHGQELETLGGLK	Eukaryota	Metazoa			Chordata	Craniata	Actinopterygii	Actinopteri	Neopterygii	Teleostei
TAEELQVANYGVGGQYEPHFDFGR	Eukaryota	Metazoa			Chordata	Craniata	Actinopterygii	Actinopteri	Neopterygii	Teleostei
TALHVAAAEGHAEVVR	Eukaryota	Metazoa			Chordata	Craniata	Actinopterygii	Actinopteri	Neopterygii	Teleostei
TALLETLTLLLAK	Eukaryota	Metazoa			Chordata	Craniata	Actinopterygii	Actinopteri	Neopterygii	Teleostei
TLLIVSHDQSFLDDVCTDIIHLDNQK	Eukaryota	Metazoa			Chordata	Craniata	Actinopterygii	Actinopteri	Neopterygii	Teleostei
VATFFGCIGTDHFGEILK	Eukaryota	Metazoa			Chordata	Craniata	Actinopterygii	Actinopteri	Neopterygii	Teleostei
VCDLMAHMASK	Eukaryota	Metazoa			Chordata	Craniata	Actinopterygii	Actinopteri	Neopterygii	Teleostei
VESFPIEEHWIIECNDGVFQR	Eukaryota	Metazoa			Chordata	Craniata	Actinopterygii	Actinopteri	Neopterygii	Teleostei
VHLSICFPDYDGPNTYEDASNYIK	Eukaryota	Metazoa			Chordata	Craniata	Actinopterygii	Actinopteri	Neopterygii	Teleostei
VLFSSLTLISK	Eukaryota	Metazoa			Chordata	Craniata	Actinopterygii	Actinopteri	Neopterygii	Teleostei
VIGLIEGLEYSFR	Eukaryota	Metazoa			Chordata	Craniata	Actinopterygii	Actinopteri	Neopterygii	Teleostei
VLGNAGHPSSLKPIMK	Eukaryota	Metazoa			Chordata	Craniata	Actinopterygii	Actinopteri	Neopterygii	Teleostei
VLNEAVAALLYHTITLSR	Eukaryota	Metazoa			Chordata	Craniata	Actinopterygii	Actinopteri	Neopterygii	Teleostei
VNEQLSDIFYK	Eukaryota	Metazoa			Chordata	Craniata	Actinopterygii	Actinopteri	Neopterygii	Teleostei
VQLLHAQNTSLLNQK	Eukaryota	Metazoa			Chordata	Craniata	Actinopterygii	Actinopteri	Neopterygii	Teleostei
VTVELDSDRPDLAAYLR	Eukaryota	Metazoa			Chordata	Craniata	Actinopterygii	Actinopteri	Neopterygii	Teleostei
WGDEHIPGSPYHITV	Eukaryota	Metazoa			Chordata	Craniata	Actinopterygii	Actinopteri	Neopterygii	Teleostei
YFEITDEAPYVHYLNTFSSK	Eukaryota	Metazoa			Chordata	Craniata	Actinopterygii	Actinopteri	Neopterygii	Teleostei
YGVITNVHVAR	Eukaryota	Metazoa			Chordata	Craniata	Actinopterygii	Actinopteri	Neopterygii	Teleostei
YHEQLSTQSLTELFESFK	Eukaryota	Metazoa			Chordata	Craniata	Actinopterygii	Actinopteri	Neopterygii	Teleostei
YLDLLTSFISLYNTCMK	Eukaryota	Metazoa			Chordata	Craniata	Actinopterygii	Actinopteri	Neopterygii	Teleostei
YIITYKPEEGEAK	Eukaryota	Metazoa			Chordata	Craniata	Actinopterygii	Actinopteri	Neopterygii	Teleostei
YLQEFAALGTGGGIYHFR	Eukaryota	Metazoa			Chordata	Craniata	Actinopterygii	Actinopteri	Neopterygii	Teleostei
YTIQDDSHTEWVSCVR	Eukaryota	Metazoa			Chordata	Craniata	Actinopterygii	Actinopteri	Neopterygii	Teleostei
YVNDLEDSYGQQWTYEQR	Eukaryota	Metazoa			Chordata	Craniata	Actinopterygii	Actinopteri	Neopterygii	Teleostei
AASDIAMTDLQPTHPIR	Eukaryota	Metazoa			Chordata	Craniata	Actinopterygii	Actinopteri	Neopterygii	Teleostei
ADHEYVTQEDFMK	Eukaryota	Metazoa			Chordata	Craniata	Actinopterygii	Actinopteri	Neopterygii	Teleostei
AEIQTALEEAEGTLEHEESK	Eukaryota	Metazoa			Chordata	Craniata	Actinopterygii	Actinopteri	Neopterygii	Teleostei
AFLEVLVNTFDIGPNK	Eukaryota	Metazoa			Chordata	Craniata	Actinopterygii	Actinopteri	Neopterygii	Teleostei
AGPWTPEAAAEHPEAVR	Eukaryota	Metazoa			Chordata	Craniata	Actinopterygii	Actinopteri	Neopterygii	Teleostei
AHIDTTESYTLVVIPECTR	Eukaryota	Metazoa			Chordata	Craniata	Actinopterygii	Actinopteri	Neopterygii	Teleostei
ALECLTGALFQRPPLIAAVK	Eukaryota	Metazoa			Chordata	Craniata	Actinopterygii	Actinopteri	Neopterygii	Teleostei
ALYAIPGLDYVSHEDILPYNSTEQVPIQHELFER	Eukaryota	Metazoa			Chordata	Craniata	Actinopterygii	Actinopteri	Neopterygii	Teleostei
ATNIDILPDTFHFTK	Eukaryota	Metazoa			Chordata	Craniata	Actinopterygii	Actinopteri	Neopterygii	Teleostei
AVVHTHLLNPEWLVNFFGSLSVEDSMECLR	Eukaryota	Metazoa			Chordata	Craniata	Actinopterygii	Actinopteri	Neopterygii	Teleostei
CGLLPISPEALSLGEVAYHDYHGILVDEEENVLIQK	Eukaryota	Metazoa			Chordata	Craniata	Actinopterygii	Actinopteri	Neopterygii	Teleostei
DFLALAQAHSK	Eukaryota	Metazoa			Chordata	Craniata	Actinopterygii	Actinopteri	Neopterygii	Teleostei
DLEDLQVLIK	Eukaryota	Metazoa			Chordata	Craniata	Actinopterygii	Actinopteri	Neopterygii	Teleostei
DLLLDQCSK	Eukaryota	Metazoa			Chordata	Craniata	Actinopterygii	Actinopteri	Neopterygii	Teleostei
DLSELQSLIEAHFIQR	Eukaryota	Metazoa			Chordata	Craniata	Actinopterygii	Actinopteri	Neopterygii	Teleostei
DLSHCQER	Eukaryota	Metazoa			Chordata	Craniata	Actinopterygii	Actinopteri	Neopterygii	Teleostei
DLSSALHLLSK	Eukaryota	Metazoa			Chordata	Craniata	Actinopterygii	Actinopteri	Neopterygii	Teleostei
DQIEAILNKPGLK	Eukaryota	Metazoa			Chordata	Craniata	Actinopterygii	Actinopteri	Neopterygii	Teleostei
DSSSEVFQQHCLSWLR	Eukaryota	Metazoa			Chordata	Craniata	Actinopterygii	Actinopteri	Neopterygii	Teleostei
DTVEHLLLLR	Eukaryota	Metazoa			Chordata	Craniata	Actinopterygii	Actinopteri	Neopterygii	Teleostei
DVTEALIMQLFGQIGPCK	Eukaryota	Metazoa			Chordata	Craniata	Actinopterygii	Actinopteri	Neopterygii	Teleostei
DYVVVTWK	Eukaryota	Metazoa			Chordata	Craniata	Actinopterygii	Actinopteri	Neopterygii	Teleostei
EAEILKPLASVEVVEK	Eukaryota	Metazoa			Chordata	Craniata	Actinopterygii	Actinopteri	Neopterygii	Teleostei
EDGTLLYDDIDYK	Eukaryota	Metazoa			Chordata	Craniata	Actinopterygii	Actinopteri	Neopterygii	Teleostei
EEEELIALR	Eukaryota	Metazoa			Chordata	Craniata	Actinopterygii	Actinopteri	Neopterygii	Teleostei
EFGSHSQTPQIQSIR	Eukaryota	Metazoa			Chordata	Craniata	Actinopterygii	Actinopteri	Neopterygii	Teleostei
EIKPALDLLEPVEQK	Eukaryota	Metazoa			Chordata	Craniata	Actinopterygii	Actinopteri	Neopterygii	Teleostei
ELLLNLIEYLCR	Eukaryota	Metazoa			Chordata	Craniata	Actinopterygii	Actinopteri	Neopterygii	Teleostei
ELLSGPNHINVR	Eukaryota	Metazoa			Chordata	Craniata	Actinopterygii	Actinopteri	Neopterygii	Teleostei
ELPQLIGSIINSESEILHHDK	Eukaryota	Metazoa			Chordata	Craniata	Actinopterygii	Actinopteri	Neopterygii	Teleostei
ELSTLEALQNLK	Eukaryota	Metazoa			Chordata	Craniata	Actinopterygii	Actinopteri	Neopterygii	Teleostei
EMVSDDHYILK	Eukaryota	Metazoa			Chordata	Craniata	Actinopterygii	Actinopteri	Neopterygii	Teleostei
EPWLFGPENTALIR	Eukaryota	Metazoa			Chordata	Craniata	Actinopterygii	Actinopteri	Neopterygii	Teleostei
EVIEVLETDPHFR	Eukaryota	Metazoa			Chordata	Craniata	Actinopterygii	Actinopteri	Neopterygii	Teleostei
FGYVDFASEEELQK	Eukaryota	Metazoa			Chordata	Craniata	Actinopterygii	Actinopteri	Neopterygii	Teleostei
FHHENIIGINDILR	Eukaryota	Metazoa			Chordata	Craniata	Actinopterygii	Actinopteri	Neopterygii	Teleostei
FSVVEQEK	Eukaryota	Metazoa			Chordata	Craniata	Actinopterygii	Actinopteri	Neopterygii	Teleostei
FVLCPECDNPETDLHINPK	Eukaryota	Metazoa			Chordata	Craniata	Actinopterygii	Actinopteri	Neopterygii	Teleostei
GADPEDVIVSAFK	Eukaryota	Metazoa			Chordata	Craniata	Actinopterygii	Actinopteri	Neopterygii	Teleostei
GFGYAEFDDIESLLR	Eukaryota	Metazoa			Chordata	Craniata	Actinopterygii	Actinopteri	Neopterygii	Teleostei
GHAGSVDTIAVDPTR	Eukaryota	Metazoa			Chordata	Craniata	Actinopterygii	Actinopteri	Neopterygii	Teleostei
GHSGWVTQIATTPQFPDMILSASR	Eukaryota	Metazoa			Chordata	Craniata	Actinopterygii	Actinopteri	Neopterygii	Teleostei
GHWANPDLVSSLQYEMLLLTDSIAK	Eukaryota	Metazoa			Chordata	Craniata	Actinopterygii	Actinopteri	Neopterygii	Teleostei
HDDTTISSWLQSLASLCGAVFR	Eukaryota	Metazoa			Chordata	Craniata	Actinopterygii	Actinopteri	Neopterygii	Teleostei
HNNCMASHLTPAVYAK	Eukaryota	Metazoa			Chordata	Craniata	Actinopterygii	Actinopteri	Neopterygii	Teleostei
HSLPGVGLSTSLTPR	Eukaryota	Metazoa			Chordata	Craniata	Actinopterygii	Actinopteri	Neopterygii	Teleostei
LASLVTMTQALCR	Eukaryota	Metazoa			Chordata	Craniata	Actinopterygii	Actinopteri	Neopterygii	Teleostei
LCAGTIGTIVHSK	Eukaryota	Metazoa			Chordata	Craniata	Actinopterygii	Actinopteri	Neopterygii	Teleostei
LCSLVQDLLTNIK	Eukaryota	Metazoa			Chordata	Craniata	Actinopterygii	Actinopteri	Neopterygii	Teleostei
IEALQDEINFLK	Eukaryota	Metazoa			Chordata	Craniata	Actinopterygii	Actinopteri	Neopterygii	Teleostei
LFLDLACELIR	Eukaryota	Metazoa			Chordata	Craniata	Actinopterygii	Actinopteri	Neopterygii	Teleostei
LGFDFLCMPLFHPR	Eukaryota	Metazoa			Chordata	Craniata	Actinopterygii	Actinopteri	Neopterygii	Teleostei
IGYLLGLNSADMLK	Eukaryota	Metazoa			Chordata	Craniata	Actinopterygii	Actinopteri	Neopterygii	Teleostei
LHDEEVADLLK	Eukaryota	Metazoa			Chordata	Craniata	Actinopterygii	Actinopteri	Neopterygii	Teleostei
LLADLEDYLNQLWEDK	Eukaryota	Metazoa			Chordata	Craniata	Actinopterygii	Actinopteri	Neopterygii	Teleostei
LLDGLEVIGR	Eukaryota	Metazoa			Chordata	Craniata	Actinopterygii	Actinopteri	Neopterygii	Teleostei
IMYSIFEHTFR	Eukaryota	Metazoa			Chordata	Craniata	Actinopterygii	Actinopteri	Neopterygii	Teleostei
LNSHNAILEFLLEGTPEIK	Eukaryota	Metazoa			Chordata	Craniata	Actinopterygii	Actinopteri	Neopterygii	Teleostei
LQIPLDGYDICLQDIQLHPDHSLFDQGVK	Eukaryota	Metazoa			Chordata	Craniata	Actinopterygii	Actinopteri	Neopterygii	Teleostei
IRPGEAEQFESTVGFK	Eukaryota	Metazoa			Chordata	Craniata	Actinopterygii	Actinopteri	Neopterygii	Teleostei
ISGSILAELIALVR	Eukaryota	Metazoa			Chordata	Craniata	Actinopterygii	Actinopteri	Neopterygii	Teleostei
LSTEAFDWLLGEIETK	Eukaryota	Metazoa			Chordata	Craniata	Actinopterygii	Actinopteri	Neopterygii	Teleostei
LTPNNWTLDQCIQTGVDNPGHPFIK	Eukaryota	Metazoa			Chordata	Craniata	Actinopterygii	Actinopteri	Neopterygii	Teleostei
IVENYSYTHLSAGDLLR	Eukaryota	Metazoa			Chordata	Craniata	Actinopterygii	Actinopteri	Neopterygii	Teleostei
LVHLTDSIGECENLTELMLTENLLQSLPR	Eukaryota	Metazoa			Chordata	Craniata	Actinopterygii	Actinopteri	Neopterygii	Teleostei
LVIVEGELER	Eukaryota	Metazoa			Chordata	Craniata	Actinopterygii	Actinopteri	Neopterygii	Teleostei
IVNVPAGKPIVLNIPIK	Eukaryota	Metazoa			Chordata	Craniata	Actinopterygii	Actinopteri	Neopterygii	Teleostei
MSADQMLQALLGSK	Eukaryota	Metazoa			Chordata	Craniata	Actinopterygii	Actinopteri	Neopterygii	Teleostei
NASIDILHAIVK	Eukaryota	Metazoa			Chordata	Craniata	Actinopterygii	Actinopteri	Neopterygii	Teleostei
NDIPELTQAPESLLESLETHLNTLEGK	Eukaryota	Metazoa			Chordata	Craniata	Actinopterygii	Actinopteri	Neopterygii	Teleostei
NDPPQEAANFTAQVIILNHPGQISAGYAPVLDCHTAHIACK	Eukaryota	Metazoa			Chordata	Craniata	Actinopterygii	Actinopteri	Neopterygii	Teleostei
NLLHLDIIK	Eukaryota	Metazoa			Chordata	Craniata	Actinopterygii	Actinopteri	Neopterygii	Teleostei
QGCSNPEVLAVLGHELGHWK	Eukaryota	Metazoa			Chordata	Craniata	Actinopterygii	Actinopteri	Neopterygii	Teleostei
QGTFHSQQSLDYGSQLVGGVSPGK	Eukaryota	Metazoa			Chordata	Craniata	Actinopterygii	Actinopteri	Neopterygii	Teleostei
QLILQHGLPLSDLDR	Eukaryota	Metazoa			Chordata	Craniata	Actinopterygii	Actinopteri	Neopterygii	Teleostei
QSVEADIVGLR	Eukaryota	Metazoa			Chordata	Craniata	Actinopterygii	Actinopteri	Neopterygii	Teleostei
QVGHHIGALSVQDDPLLMLALNSAK	Eukaryota	Metazoa			Chordata	Craniata	Actinopterygii	Actinopteri	Neopterygii	Teleostei
QVSSQEVGHDEFSTQTLAR	Eukaryota	Metazoa			Chordata	Craniata	Actinopterygii	Actinopteri	Neopterygii	Teleostei
QYEHQQTYHVIPEVIK	Eukaryota	Metazoa			Chordata	Craniata	Actinopterygii	Actinopteri	Neopterygii	Teleostei
SGDAAIVEMVPGKPMCVESFSTYPPLGR	Eukaryota	Metazoa			Chordata	Craniata	Actinopterygii	Actinopteri	Neopterygii	Teleostei
SLSSLGNVISALAEGSTYVPYR	Eukaryota	Metazoa			Chordata	Craniata	Actinopterygii	Actinopteri	Neopterygii	Teleostei
TAVSTTWLLPYAHTWPK	Eukaryota	Metazoa			Chordata	Craniata	Actinopterygii	Actinopteri	Neopterygii	Teleostei
TEAPPHIFSISDNAYQYMLSDR	Eukaryota	Metazoa			Chordata	Craniata	Actinopterygii	Actinopteri	Neopterygii	Teleostei
TEELVCEQLDLLHLR	Eukaryota	Metazoa			Chordata	Craniata	Actinopterygii	Actinopteri	Neopterygii	Teleostei
TEWHLNAHPTR	Eukaryota	Metazoa			Chordata	Craniata	Actinopterygii	Actinopteri	Neopterygii	Teleostei
TRPTDQELLDLYGLYK	Eukaryota	Metazoa			Chordata	Craniata	Actinopterygii	Actinopteri	Neopterygii	Teleostei
TTTNVLGDSIGAGIIEFLSK	Eukaryota	Metazoa			Chordata	Craniata	Actinopterygii	Actinopteri	Neopterygii	Teleostei
VDFSHVTEEWR	Eukaryota	Metazoa			Chordata	Craniata	Actinopterygii	Actinopteri	Neopterygii	Teleostei
VGEVTYVEHLMDGEGK	Eukaryota	Metazoa			Chordata	Craniata	Actinopterygii	Actinopteri	Neopterygii	Teleostei
VGLLHSQNTSLLNTK	Eukaryota	Metazoa			Chordata	Craniata	Actinopterygii	Actinopteri	Neopterygii	Teleostei
VIQEVADTYAFIAR	Eukaryota	Metazoa			Chordata	Craniata	Actinopterygii	Actinopteri	Neopterygii	Teleostei
VNEDAEDK	Eukaryota	Metazoa			Chordata	Craniata	Actinopterygii	Actinopteri	Neopterygii	Teleostei
VQSLLELICDLK	Eukaryota	Metazoa			Chordata	Craniata	Actinopterygii	Actinopteri	Neopterygii	Teleostei
VSAENQYGIGTPAEHVPIVAK	Eukaryota	Metazoa			Chordata	Craniata	Actinopterygii	Actinopteri	Neopterygii	Teleostei
WFHNEIEIK	Eukaryota	Metazoa			Chordata	Craniata	Actinopterygii	Actinopteri	Neopterygii	Teleostei
WIWTVDRPDFVHAAK	Eukaryota	Metazoa			Chordata	Craniata	Actinopterygii	Actinopteri	Neopterygii	Teleostei
WVGILEGLQSILAK	Eukaryota	Metazoa			Chordata	Craniata	Actinopterygii	Actinopteri	Neopterygii	Teleostei
YGDLTEDQLPSCESLK	Eukaryota	Metazoa			Chordata	Craniata	Actinopterygii	Actinopteri	Neopterygii	Teleostei
YYGGTEHVDELER	Eukaryota	Metazoa			Chordata	Craniata	Actinopterygii	Actinopteri	Neopterygii	Teleostei
AAADLMSYCEQHAR	Eukaryota	Metazoa			Chordata	Craniata	Actinopterygii	Actinopteri	Neopterygii	Teleostei
AEVQNLGGELVVSGLDSAMSLIQAAK	Eukaryota	Metazoa			Chordata	Craniata	Actinopterygii	Actinopteri	Neopterygii	Teleostei
AFAIIDQDNSGFIEEEELK	Eukaryota	Metazoa			Chordata	Craniata	Actinopterygii	Actinopteri	Neopterygii	Teleostei
AFQFVETHGEVCPASWTPK	Eukaryota	Metazoa			Chordata	Craniata	Actinopterygii	Actinopteri	Neopterygii	Teleostei
AYGPGLQSSGLSVGKPAEFTVDAK	Eukaryota	Metazoa			Chordata	Craniata	Actinopterygii	Actinopteri	Neopterygii	Teleostei
CAHVFTTVSQITAIEAEHLLK	Eukaryota	Metazoa			Chordata	Craniata	Actinopterygii	Actinopteri	Neopterygii	Teleostei
DADSTPLAFSHFR	Eukaryota	Metazoa			Chordata	Craniata	Actinopterygii	Actinopteri	Neopterygii	Teleostei
DAQLHLDDAVR	Eukaryota	Metazoa			Chordata	Craniata	Actinopterygii	Actinopteri	Neopterygii	Teleostei
DEEELIALVNR	Eukaryota	Metazoa			Chordata	Craniata	Actinopterygii	Actinopteri	Neopterygii	Teleostei
DLESWFQAK	Eukaryota	Metazoa			Chordata	Craniata	Actinopterygii	Actinopteri	Neopterygii	Teleostei
DLTELQSLIEAHFLQR	Eukaryota	Metazoa			Chordata	Craniata	Actinopterygii	Actinopteri	Neopterygii	Teleostei
DPELWASVLLETNPFR	Eukaryota	Metazoa			Chordata	Craniata	Actinopterygii	Actinopteri	Neopterygii	Teleostei
DSVTILTHCNTGSLATAGYGTALGVVR	Eukaryota	Metazoa			Chordata	Craniata	Actinopterygii	Actinopteri	Neopterygii	Teleostei
EAHEQLAITDAK	Eukaryota	Metazoa			Chordata	Craniata	Actinopterygii	Actinopteri	Neopterygii	Teleostei
EDEVPVLR	Eukaryota	Metazoa			Chordata	Craniata	Actinopterygii	Actinopteri	Neopterygii	Teleostei
EEELQAVLAR	Eukaryota	Metazoa			Chordata	Craniata	Actinopterygii	Actinopteri	Neopterygii	Teleostei
EFLEELLTTQCDR	Eukaryota	Metazoa			Chordata	Craniata	Actinopterygii	Actinopteri	Neopterygii	Teleostei
EICNDVLVLLDK	Eukaryota	Metazoa			Chordata	Craniata	Actinopterygii	Actinopteri	Neopterygii	Teleostei
ELQHFLQDGQELTLWINEK	Eukaryota	Metazoa			Chordata	Craniata	Actinopterygii	Actinopteri	Neopterygii	Teleostei
ELSVLLGMLDPDER	Eukaryota	Metazoa			Chordata	Craniata	Actinopterygii	Actinopteri	Neopterygii	Teleostei
EQPMDEEMK	Eukaryota	Metazoa			Chordata	Craniata	Actinopterygii	Actinopteri	Neopterygii	Teleostei
FAVHLEEHYK	Eukaryota	Metazoa			Chordata	Craniata	Actinopterygii	Actinopteri	Neopterygii	Teleostei
FDILDFSYHLLK	Eukaryota	Metazoa			Chordata	Craniata	Actinopterygii	Actinopteri	Neopterygii	Teleostei
FEALAAHDALVELSGALNTVAVSMMK	Eukaryota	Metazoa			Chordata	Craniata	Actinopterygii	Actinopteri	Neopterygii	Teleostei
FGAQNDDLLPSVLVLMQR	Eukaryota	Metazoa			Chordata	Craniata	Actinopterygii	Actinopteri	Neopterygii	Teleostei
FHAPVIQDNPSGWGPCAVPEK	Eukaryota	Metazoa			Chordata	Craniata	Actinopterygii	Actinopteri	Neopterygii	Teleostei
FPSSYEEIEVLWR	Eukaryota	Metazoa			Chordata	Craniata	Actinopterygii	Actinopteri	Neopterygii	Teleostei
FTGAVLHHGNMK	Eukaryota	Metazoa			Chordata	Craniata	Actinopterygii	Actinopteri	Neopterygii	Teleostei
FVQLVQLLR	Eukaryota	Metazoa			Chordata	Craniata	Actinopterygii	Actinopteri	Neopterygii	Teleostei
FYSAEIVCALEYLHQK	Eukaryota	Metazoa			Chordata	Craniata	Actinopterygii	Actinopteri	Neopterygii	Teleostei
GDVTDLAK	Eukaryota	Metazoa			Chordata	Craniata	Actinopterygii	Actinopteri	Neopterygii	Teleostei
GEGGAGLLAAIEEAIK	Eukaryota	Metazoa			Chordata	Craniata	Actinopterygii	Actinopteri	Neopterygii	Teleostei
GILAIAWSVADPELLLSCGK	Eukaryota	Metazoa			Chordata	Craniata	Actinopterygii	Actinopteri	Neopterygii	Teleostei
GLIEIISNAAEYK	Eukaryota	Metazoa			Chordata	Craniata	Actinopterygii	Actinopteri	Neopterygii	Teleostei
GILSNVAAIEETTDFFK	Eukaryota	Metazoa			Chordata	Craniata	Actinopterygii	Actinopteri	Neopterygii	Teleostei
GPCIIYNEDNGVTR	Eukaryota	Metazoa			Chordata	Craniata	Actinopterygii	Actinopteri	Neopterygii	Teleostei
GVENVYTQHQPLLHDTLDQLIK	Eukaryota	Metazoa			Chordata	Craniata	Actinopterygii	Actinopteri	Neopterygii	Teleostei
HAVQAFFDCLR	Eukaryota	Metazoa			Chordata	Craniata	Actinopterygii	Actinopteri	Neopterygii	Teleostei
HGFSIEVGPQPHGVVR	Eukaryota	Metazoa			Chordata	Craniata	Actinopterygii	Actinopteri	Neopterygii	Teleostei
HLADQLGFEYYEASAK	Eukaryota	Metazoa			Chordata	Craniata	Actinopterygii	Actinopteri	Neopterygii	Teleostei
HLAELGLTEAVDK	Eukaryota	Metazoa			Chordata	Craniata	Actinopterygii	Actinopteri	Neopterygii	Teleostei
HNHGFMWNEHLGFILTCPSNLGTGLR	Eukaryota	Metazoa			Chordata	Craniata	Actinopterygii	Actinopteri	Neopterygii	Teleostei
HTFLEEFITPIVK	Eukaryota	Metazoa			Chordata	Craniata	Actinopterygii	Actinopteri	Neopterygii	Teleostei
ICADGALLSK	Eukaryota	Metazoa			Chordata	Craniata	Actinopterygii	Actinopteri	Neopterygii	Teleostei
ICKPDYLPTEQDVLR	Eukaryota	Metazoa			Chordata	Craniata	Actinopterygii	Actinopteri	Neopterygii	Teleostei
ICLFELSDFK	Eukaryota	Metazoa			Chordata	Craniata	Actinopterygii	Actinopteri	Neopterygii	Teleostei
LDLEAWFPGSQAFR	Eukaryota	Metazoa			Chordata	Craniata	Actinopterygii	Actinopteri	Neopterygii	Teleostei
LDPYAQNLK	Eukaryota	Metazoa			Chordata	Craniata	Actinopterygii	Actinopteri	Neopterygii	Teleostei
LDVSAFDALIIPGGFGVAK	Eukaryota	Metazoa			Chordata	Craniata	Actinopterygii	Actinopteri	Neopterygii	Teleostei
IFDWNLISR	Eukaryota	Metazoa			Chordata	Craniata	Actinopterygii	Actinopteri	Neopterygii	Teleostei
LFYADHPFVFLVK	Eukaryota	Metazoa			Chordata	Craniata	Actinopterygii	Actinopteri	Neopterygii	Teleostei
LGLLALVNEESHFPK	Eukaryota	Metazoa			Chordata	Craniata	Actinopterygii	Actinopteri	Neopterygii	Teleostei
IGNYGAQHILSGVPR	Eukaryota	Metazoa			Chordata	Craniata	Actinopterygii	Actinopteri	Neopterygii	Teleostei
IHATLDQTLSELNSF	Eukaryota	Metazoa			Chordata	Craniata	Actinopterygii	Actinopteri	Neopterygii	Teleostei
IHEYNIVMDTVSR	Eukaryota	Metazoa			Chordata	Craniata	Actinopterygii	Actinopteri	Neopterygii	Teleostei
LHILVSSK	Eukaryota	Metazoa			Chordata	Craniata	Actinopterygii	Actinopteri	Neopterygii	Teleostei
LLGNALVALSDLR	Eukaryota	Metazoa			Chordata	Craniata	Actinopterygii	Actinopteri	Neopterygii	Teleostei
IMDPNIVGTEHYDVAR	Eukaryota	Metazoa			Chordata	Craniata	Actinopterygii	Actinopteri	Neopterygii	Teleostei
ISPLLEEQFLQGK	Eukaryota	Metazoa			Chordata	Craniata	Actinopterygii	Actinopteri	Neopterygii	Teleostei
LTDVIVSEVLHGADGTDIR	Eukaryota	Metazoa			Chordata	Craniata	Actinopterygii	Actinopteri	Neopterygii	Teleostei
LTQENHPEAELILK	Eukaryota	Metazoa			Chordata	Craniata	Actinopterygii	Actinopteri	Neopterygii	Teleostei
LWDYLQELLK	Eukaryota	Metazoa			Chordata	Craniata	Actinopterygii	Actinopteri	Neopterygii	Teleostei
LYLSPSIEHALGGSSALHIPAFPSGGCLIDYVPQVCQLLTNK	Eukaryota	Metazoa			Chordata	Craniata	Actinopterygii	Actinopteri	Neopterygii	Teleostei
MEIQEDDVPTLWAHGFCDR	Eukaryota	Metazoa			Chordata	Craniata	Actinopterygii	Actinopteri	Neopterygii	Teleostei
MFQETQVPHLLEAGFK	Eukaryota	Metazoa			Chordata	Craniata	Actinopterygii	Actinopteri	Neopterygii	Teleostei
NFFFFDGLK	Eukaryota	Metazoa			Chordata	Craniata	Actinopterygii	Actinopteri	Neopterygii	Teleostei
NHGLVSVGETVEEAFYYIHNLVTACEIQVR	Eukaryota	Metazoa			Chordata	Craniata	Actinopterygii	Actinopteri	Neopterygii	Teleostei
NLEVPETHVATFECEVSHFNVPSTWLK	Eukaryota	Metazoa			Chordata	Craniata	Actinopterygii	Actinopteri	Neopterygii	Teleostei
NLFLSEVLNVIR	Eukaryota	Metazoa			Chordata	Craniata	Actinopterygii	Actinopteri	Neopterygii	Teleostei
NLWAAFPPDVAGNVDYK	Eukaryota	Metazoa			Chordata	Craniata	Actinopterygii	Actinopteri	Neopterygii	Teleostei
NNLVEQHIQDVVVHYTFNK	Eukaryota	Metazoa			Chordata	Craniata	Actinopterygii	Actinopteri	Neopterygii	Teleostei
NQLEQELEELTASLFEEAHK	Eukaryota	Metazoa			Chordata	Craniata	Actinopterygii	Actinopteri	Neopterygii	Teleostei
NTYAELSVLHSEK	Eukaryota	Metazoa			Chordata	Craniata	Actinopterygii	Actinopteri	Neopterygii	Teleostei
QAVQLPHGEDLNDWVAVHVVDFFNR	Eukaryota	Metazoa			Chordata	Craniata	Actinopterygii	Actinopteri	Neopterygii	Teleostei
QQDAHEFLLHLINLVER	Eukaryota	Metazoa			Chordata	Craniata	Actinopterygii	Actinopteri	Neopterygii	Teleostei
SDLELQIEGLK	Eukaryota	Metazoa			Chordata	Craniata	Actinopterygii	Actinopteri	Neopterygii	Teleostei
SDLELQIEGLR	Eukaryota	Metazoa			Chordata	Craniata	Actinopterygii	Actinopteri	Neopterygii	Teleostei
STVILGWEKPLHDGGSR	Eukaryota	Metazoa			Chordata	Craniata	Actinopterygii	Actinopteri	Neopterygii	Teleostei
SVDIILDNDLVDAVKPGDR	Eukaryota	Metazoa			Chordata	Craniata	Actinopterygii	Actinopteri	Neopterygii	Teleostei
SVNEALNNLFISEEDYQALR	Eukaryota	Metazoa			Chordata	Craniata	Actinopterygii	Actinopteri	Neopterygii	Teleostei
TCNVLVALEQQSPDIAQGVHVDR	Eukaryota	Metazoa			Chordata	Craniata	Actinopterygii	Actinopteri	Neopterygii	Teleostei
TIHNDPGFVVTLSNR	Eukaryota	Metazoa			Chordata	Craniata	Actinopterygii	Actinopteri	Neopterygii	Teleostei
VDQHLQEFQK	Eukaryota	Metazoa			Chordata	Craniata	Actinopterygii	Actinopteri	Neopterygii	Teleostei
VENQEGAQNLVISDTELK	Eukaryota	Metazoa			Chordata	Craniata	Actinopterygii	Actinopteri	Neopterygii	Teleostei
VGADNHVLPLDCITIQTYLSK	Eukaryota	Metazoa			Chordata	Craniata	Actinopterygii	Actinopteri	Neopterygii	Teleostei
VGDLTEGGIYYFR	Eukaryota	Metazoa			Chordata	Craniata	Actinopterygii	Actinopteri	Neopterygii	Teleostei
VHLYSVQGNTLK	Eukaryota	Metazoa			Chordata	Craniata	Actinopterygii	Actinopteri	Neopterygii	Teleostei
VPSTETEALASSLMGLFEK	Eukaryota	Metazoa			Chordata	Craniata	Actinopterygii	Actinopteri	Neopterygii	Teleostei
VQHELEEAQER	Eukaryota	Metazoa			Chordata	Craniata	Actinopterygii	Actinopteri	Neopterygii	Teleostei
VSLFGTDASAVVNCLHILSR	Eukaryota	Metazoa			Chordata	Craniata	Actinopterygii	Actinopteri	Neopterygii	Teleostei
VTNLTEGNEYEFR	Eukaryota	Metazoa			Chordata	Craniata	Actinopterygii	Actinopteri	Neopterygii	Teleostei
VVHLLNDQHMGVVTAAISLITCLSQK	Eukaryota	Metazoa			Chordata	Craniata	Actinopterygii	Actinopteri	Neopterygii	Teleostei
VYDLQSDAVYK	Eukaryota	Metazoa			Chordata	Craniata	Actinopterygii	Actinopteri	Neopterygii	Teleostei
WLQGLGWVPIGSVDVEK	Eukaryota	Metazoa			Chordata	Craniata	Actinopterygii	Actinopteri	Neopterygii	Teleostei
YGGALQNLSLK	Eukaryota	Metazoa			Chordata	Craniata	Actinopterygii	Actinopteri	Neopterygii	Teleostei
YLLAQNVSTCIDPLEVCLHR	Eukaryota	Metazoa			Chordata	Craniata	Actinopterygii	Actinopteri	Neopterygii	Teleostei
YTAYTMEHLR	Eukaryota	Metazoa			Chordata	Craniata	Actinopterygii	Actinopteri	Neopterygii	Teleostei
YWPTEPGEYAVHVLCK	Eukaryota	Metazoa			Chordata	Craniata	Actinopterygii	Actinopteri	Neopterygii	Teleostei
CNEVIGWLDK	Eukaryota	Metazoa			Chordata	Craniata	Actinopterygii	Actinopteri	Neopterygii	Teleostei
DDPLIVLALNSAK	Eukaryota	Metazoa			Chordata	Craniata	Actinopterygii	Actinopteri	Neopterygii	Teleostei
DDSVPNLIQLITNSVEMHAYTVQR	Eukaryota	Metazoa			Chordata	Craniata	Actinopterygii	Actinopteri	Neopterygii	Teleostei
DPQIDQFLVVAR	Eukaryota	Metazoa			Chordata	Craniata	Actinopterygii	Actinopteri	Neopterygii	Teleostei
DPVGGSVEFHFVPILK	Eukaryota	Metazoa			Chordata	Craniata	Actinopterygii	Actinopteri	Neopterygii	Teleostei
ELLSDIEEHLK	Eukaryota	Metazoa			Chordata	Craniata	Actinopterygii	Actinopteri	Neopterygii	Teleostei
HSTIYPSSEDLEAVQSLVSTVECALK	Eukaryota	Metazoa			Chordata	Craniata	Actinopterygii	Actinopteri	Neopterygii	Teleostei
HYLDQLNHILGVLGSPSQDDLNCIINMK	Eukaryota	Metazoa			Chordata	Craniata	Actinopterygii	Actinopteri	Neopterygii	Teleostei
ILAHITGTEYLQDPDEEALR	Eukaryota	Metazoa			Chordata	Craniata	Actinopterygii	Actinopteri	Neopterygii	Teleostei
LIEQLTAELQALK	Eukaryota	Metazoa			Chordata	Craniata	Actinopterygii	Actinopteri	Neopterygii	Teleostei
ILFIFIDSDVDDNQR	Eukaryota	Metazoa			Chordata	Craniata	Actinopterygii	Actinopteri	Neopterygii	Teleostei
LQSGYVPNIQELFQILDNHLK	Eukaryota	Metazoa			Chordata	Craniata	Actinopterygii	Actinopteri	Neopterygii	Teleostei
LTSFWNLILDEK	Eukaryota	Metazoa			Chordata	Craniata	Actinopterygii	Actinopteri	Neopterygii	Teleostei
MEAPPHIFSVSDNAYQFMLTDR	Eukaryota	Metazoa			Chordata	Craniata	Actinopterygii	Actinopteri	Neopterygii	Teleostei
NHEEELLAVR	Eukaryota	Metazoa			Chordata	Craniata	Actinopterygii	Actinopteri	Neopterygii	Teleostei
QVGHHIGALSVK	Eukaryota	Metazoa			Chordata	Craniata	Actinopterygii	Actinopteri	Neopterygii	Teleostei
SHLMEIQLNGGTISDK	Eukaryota	Metazoa			Chordata	Craniata	Actinopterygii	Actinopteri	Neopterygii	Teleostei
TENHISGEYFATIIK	Eukaryota	Metazoa			Chordata	Craniata	Actinopterygii	Actinopteri	Neopterygii	Teleostei
TVEHGFPHQPSALGFSPSLELLAIGTR	Eukaryota	Metazoa			Chordata	Craniata	Actinopterygii	Actinopteri	Neopterygii	Teleostei
VAIIVTDGRPQDQVEEVSAAAR	Eukaryota	Metazoa			Chordata	Craniata	Actinopterygii	Actinopteri	Neopterygii	Teleostei
VLNETRPGDGILLNACCPGWVR	Eukaryota	Metazoa			Chordata	Craniata	Actinopterygii	Actinopteri	Neopterygii	Teleostei
VLQEGLCQLDSILSALEPLHRPIEVPGGSVLLR	Eukaryota	Metazoa			Chordata	Craniata	Actinopterygii	Actinopteri	Neopterygii	Teleostei
VQISAAHTDEDIDR	Eukaryota	Metazoa			Chordata	Craniata	Actinopterygii	Actinopteri	Neopterygii	Teleostei
VWDPNNQLK	Eukaryota	Metazoa			Chordata	Craniata	Actinopterygii	Actinopteri	Neopterygii	Teleostei
YEEGQAELEGAQK	Eukaryota	Metazoa			Chordata	Craniata	Actinopterygii	Actinopteri	Neopterygii	Teleostei
YIEENVDK	Eukaryota	Metazoa			Chordata	Craniata	Actinopterygii	Actinopteri	Neopterygii	Teleostei
YVFDSAFHPDTGEK	Eukaryota	Metazoa			Chordata	Craniata	Actinopterygii	Actinopteri	Neopterygii	Teleostei
ACADATLSQITANIDPVGR	Eukaryota	Metazoa			Chordata	Craniata
AHVPQTFTVDCSK	Eukaryota	Metazoa			Chordata	Craniata
AIGSASEGAQSSLQEVYHK	Eukaryota	Metazoa			Chordata	Craniata
AILLSVPLLVVDNK	Eukaryota	Metazoa			Chordata	Craniata
AQLNIGNVLPVGTMPEGTIVCCLEEKPGDR	Eukaryota	Metazoa			Chordata	Craniata
ATGISHAIHGNFSGTK	Eukaryota	Metazoa			Chordata	Craniata
AVFDNLIQLEHLNIVK	Eukaryota	Metazoa			Chordata	Craniata
CLIVYPWTQR	Eukaryota	Metazoa			Chordata	Craniata
DGSGFLINLIDSPGHVDFSSEVTAALR	Eukaryota	Metazoa			Chordata	Craniata
DLEESTLQHEATAAALR	Eukaryota	Metazoa			Chordata	Craniata
DLEHWFQSK	Eukaryota	Metazoa			Chordata	Craniata
DITLFHAMDTLQK	Eukaryota	Metazoa			Chordata	Craniata
DPLNESVVQLYQK	Eukaryota	Metazoa			Chordata	Craniata
DVDEAYMNK	Eukaryota	Metazoa			Chordata	Craniata
DVTVGDIVTVGECRPLSK	Eukaryota	Metazoa			Chordata	Craniata
EAFLASDDK	Eukaryota	Metazoa			Chordata	Craniata
EEQAEPDGTEEADK	Eukaryota	Metazoa			Chordata	Craniata
EHPWEVMPDLYFYR	Eukaryota	Metazoa			Chordata	Craniata
EHWNPAIVALVYNVLK	Eukaryota	Metazoa			Chordata	Craniata
ELYYHGDPIPIK	Eukaryota	Metazoa			Chordata	Craniata
ESPEVLLTLDILK	Eukaryota	Metazoa			Chordata	Craniata
ETLINVAR	Eukaryota	Metazoa			Chordata	Craniata
FACNGTVIEHPEYGEVIQLQGDQR	Eukaryota	Metazoa			Chordata	Craniata
FDLGQDVIDFTGHALALYR	Eukaryota	Metazoa			Chordata	Craniata
FDNIGVLGLDLWQVK	Eukaryota	Metazoa			Chordata	Craniata
FDNVLPASLAFDK	Eukaryota	Metazoa			Chordata	Craniata
FDTVEDFWALYNHIQQPSK	Eukaryota	Metazoa			Chordata	Craniata
FEDYVQSVDVAAFNK	Eukaryota	Metazoa			Chordata	Craniata
FHLQNTLYPQYDPVYR	Eukaryota	Metazoa			Chordata	Craniata
FLQDYFDGNLK	Eukaryota	Metazoa			Chordata	Craniata
FNVFHWHIVDDPSFPYQSR	Eukaryota	Metazoa			Chordata	Craniata
FQEHLQLQNLGINPANIGFSTLTMESDK	Eukaryota	Metazoa			Chordata	Craniata
FQEYHIQQNEALAAK	Eukaryota	Metazoa			Chordata	Craniata
FSSVQLLGDLLFHISGVTGK	Eukaryota	Metazoa			Chordata	Craniata
FTSILQHAVEALAPSLPLQEDFVYHWK	Eukaryota	Metazoa			Chordata	Craniata
FVTAIWNLLVTTGQEVK	Eukaryota	Metazoa			Chordata	Craniata
FYFENLLSK	Eukaryota	Metazoa			Chordata	Craniata
GADIMYSGTIDCWR	Eukaryota	Metazoa			Chordata	Craniata
GDSLDSVEALIK	Eukaryota	Metazoa			Chordata	Craniata
HEAFETDFTVHR	Eukaryota	Metazoa			Chordata	Craniata
HECTLSSQEYVHELR	Eukaryota	Metazoa			Chordata	Craniata
HGFSGIPITETGK	Eukaryota	Metazoa			Chordata	Craniata
HLEINPDHPIMETLR	Eukaryota	Metazoa			Chordata	Craniata
HIGVCISVANNR	Eukaryota	Metazoa			Chordata	Craniata
HPEASVNFSEFSK	Eukaryota	Metazoa			Chordata	Craniata
HWVDPLPDVDGR	Eukaryota	Metazoa			Chordata	Craniata
LAELEEFINGPNNAHIQQVGDR	Eukaryota	Metazoa			Chordata	Craniata
IAGEASCLAHYNK	Eukaryota	Metazoa			Chordata	Craniata
IAPVHIDSEAISALVK	Eukaryota	Metazoa			Chordata	Craniata
IAPVHIDTESISALIK	Eukaryota	Metazoa			Chordata	Craniata
LDDVLEDAEK	Eukaryota	Metazoa			Chordata	Craniata
LDEIYLAGLVAHSDLDER	Eukaryota	Metazoa			Chordata	Craniata
LEGDHQLIQEALIFDNK	Eukaryota	Metazoa			Chordata	Craniata
LFADAGLVCITSFISPFTK	Eukaryota	Metazoa			Chordata	Craniata
LFDHVAECLGDFMEK	Eukaryota	Metazoa			Chordata	Craniata
LGGSLTDSYLDEGFLLDK	Eukaryota	Metazoa			Chordata	Craniata
LGIYTILFER	Eukaryota	Metazoa			Chordata	Craniata
LHDSISEEGFHYLVFDLVTGGELFEDIVAR	Eukaryota	Metazoa			Chordata	Craniata
LLEAQIATGGIIDPINSHR	Eukaryota	Metazoa			Chordata	Craniata
ILGVDLLPGYYDPFSGR	Eukaryota	Metazoa			Chordata	Craniata
LLQQVAQIYQSIEFSR	Eukaryota	Metazoa			Chordata	Craniata
IPNFWVTTFVNHPQVSALLGEEDEEALHYLTR	Eukaryota	Metazoa			Chordata	Craniata
LQEAEEQIEAVNSK	Eukaryota	Metazoa			Chordata	Craniata
ISQMPVILTPLHFDR	Eukaryota	Metazoa			Chordata	Craniata
ITGHFYASQLAQR	Eukaryota	Metazoa			Chordata	Craniata
IVATKPLYVALAQR	Eukaryota	Metazoa			Chordata	Craniata
LVLPSLLVALEEESWR	Eukaryota	Metazoa			Chordata	Craniata
LWEYLLELLK	Eukaryota	Metazoa			Chordata	Craniata
MVALLQEK	Eukaryota	Metazoa			Chordata	Craniata
MVCDVVSR	Eukaryota	Metazoa			Chordata	Craniata
NALAHAVQSAR	Eukaryota	Metazoa			Chordata	Craniata
NFEHLIPDAPELIHDFLVNEK	Eukaryota	Metazoa			Chordata	Craniata
NLALGGGLLLLLAESR	Eukaryota	Metazoa			Chordata	Craniata
NLDSLEEDLDFLR	Eukaryota	Metazoa			Chordata	Craniata
NIFHLFYDVVPTYHK	Eukaryota	Metazoa			Chordata	Craniata
NMTEAEQQQLIDDHFLFDKPVSPLLLASGMAR	Eukaryota	Metazoa			Chordata	Craniata
NVVMPAVFR	Eukaryota	Metazoa			Chordata	Craniata
QAFTQQIEELK	Eukaryota	Metazoa			Chordata	Craniata
QILEDAASLIIYHVK	Eukaryota	Metazoa			Chordata	Craniata
QLILEEIFTSLAR	Eukaryota	Metazoa			Chordata	Craniata
QIQELVEAIVLPMNHK	Eukaryota	Metazoa			Chordata	Craniata
QLYHLGVIEAYTGQTK	Eukaryota	Metazoa			Chordata	Craniata
QQISLATQVVK	Eukaryota	Metazoa			Chordata	Craniata
QVGEQFLNIR	Eukaryota	Metazoa			Chordata	Craniata
QYPWGVVQVENESHCDFVK	Eukaryota	Metazoa			Chordata	Craniata
SAEFLLHMLK	Eukaryota	Metazoa			Chordata	Craniata
SFDALLADLTR	Eukaryota	Metazoa			Chordata	Craniata
SLGVIMGYIDDPDK	Eukaryota	Metazoa			Chordata	Craniata
SILGTLTVEQIYQDR	Eukaryota	Metazoa			Chordata	Craniata
TGDFQLHTNVNDGSEFGGSIYQK	Eukaryota	Metazoa			Chordata	Craniata
TGVDIDVGTALYASDR	Eukaryota	Metazoa			Chordata	Craniata
THSFFIPDIEYLVDLR	Eukaryota	Metazoa			Chordata	Craniata
TPLVSVLLEGPPHSGK	Eukaryota	Metazoa			Chordata	Craniata
TTSNDIVEIFTVLGIEAVR	Eukaryota	Metazoa			Chordata	Craniata
TTTNVLGDSIGAGIVEHLSR	Eukaryota	Metazoa			Chordata	Craniata
VDHIQEIVTGNPTVIK	Eukaryota	Metazoa			Chordata	Craniata
VEMLEIIEAIYK	Eukaryota	Metazoa			Chordata	Craniata
VFILGPSHHVPLSR	Eukaryota	Metazoa			Chordata	Craniata
VFNNVLLQQTQHLDSHGEPTITSLYTNWYLETLLR	Eukaryota	Metazoa			Chordata	Craniata
VGWEQLLTTIAR	Eukaryota	Metazoa			Chordata	Craniata
VHAENGELVAEGAR	Eukaryota	Metazoa			Chordata	Craniata
VLCELAELQDK	Eukaryota	Metazoa			Chordata	Craniata
VLEEFSVELVCLAGFMR	Eukaryota	Metazoa			Chordata	Craniata
VPVVLGSPDDVK	Eukaryota	Metazoa			Chordata	Craniata
VQLLHSQNTSLLNQK	Eukaryota	Metazoa			Chordata	Craniata
WALSQSNPSALR	Eukaryota	Metazoa			Chordata	Craniata
WETPYMHSLATVAASK	Eukaryota	Metazoa			Chordata	Craniata
WNSVFDQLTQVVK	Eukaryota	Metazoa			Chordata	Craniata
WSEEACAAHLTQR	Eukaryota	Metazoa			Chordata	Craniata
YAEIVHLTLPDGTK	Eukaryota	Metazoa			Chordata	Craniata
YGAVWTGDNAAEWGHLK	Eukaryota	Metazoa			Chordata	Craniata
YILEQFLQQELLINITEHELVPEHIVMTK	Eukaryota	Metazoa			Chordata	Craniata
AAYLMGLNSADLLK	Eukaryota	Metazoa			Chordata	Craniata
ADDIGHDALSR	Eukaryota	Metazoa			Chordata	Craniata
AEAHFSLVHYAGTVDYNISGWLDK	Eukaryota	Metazoa			Chordata	Craniata
AEFEVHEVYAVDVLVSTGEGK	Eukaryota	Metazoa			Chordata	Craniata
AFLSAGDSDGDGK	Eukaryota	Metazoa			Chordata	Craniata
ALLANALTSALR	Eukaryota	Metazoa			Chordata	Craniata
AINQIAAALFTIHK	Eukaryota	Metazoa			Chordata	Craniata
ANLEAQIAEAEER	Eukaryota	Metazoa			Chordata	Craniata
CYEFLDLLLQEWQTHSLER	Eukaryota	Metazoa			Chordata	Craniata
DEFSHQVQEWNK	Eukaryota	Metazoa			Chordata	Craniata
DFIEQHYVTLK	Eukaryota	Metazoa			Chordata	Craniata
DGALHMIGSLAEILLK	Eukaryota	Metazoa			Chordata	Craniata
DGHNLISLLEVLSGETLPR	Eukaryota	Metazoa			Chordata	Craniata
DHPAVAATLNNLAVLYGK	Eukaryota	Metazoa			Chordata	Craniata
DLEEATLQHEATAATLR	Eukaryota	Metazoa			Chordata	Craniata
DILVEVNHPFIVK	Eukaryota	Metazoa			Chordata	Craniata
DLSTIEPLK	Eukaryota	Metazoa			Chordata	Craniata
DMLLANPHELSLLK	Eukaryota	Metazoa			Chordata	Craniata
DQGTFEDFVEGLR	Eukaryota	Metazoa			Chordata	Craniata
DYTFAYGLGLNHFVPDR	Eukaryota	Metazoa			Chordata	Craniata
EDLVFIFWAPESAPLK	Eukaryota	Metazoa			Chordata	Craniata
EDNTLLYEITAYLEAAGIHNPLNK	Eukaryota	Metazoa			Chordata	Craniata
EELQQLNDR	Eukaryota	Metazoa			Chordata	Craniata
EEQVISLGPQVAEGENVFGVCHIFASFNDTFVHVTDLSGK	Eukaryota	Metazoa			Chordata	Craniata
EGIPALDNFLDK	Eukaryota	Metazoa			Chordata	Craniata
EIAAPELEPLHLR	Eukaryota	Metazoa			Chordata	Craniata
EQAEAEVASLNR	Eukaryota	Metazoa			Chordata	Craniata
EQFEEEQEAK	Eukaryota	Metazoa			Chordata	Craniata
ESPCVLLYIPDGHTK	Eukaryota	Metazoa			Chordata	Craniata
ESYAIYVYK	Eukaryota	Metazoa			Chordata	Craniata
ETSYTLNTDSLDWALYDHLMDFLADR	Eukaryota	Metazoa			Chordata	Craniata
EVPIPEHIDIYHLTR	Eukaryota	Metazoa			Chordata	Craniata
EVVLAEKPLISEETDLIEPTLLDELICHIGTLASVYHKPPSAFVEGSR	Eukaryota	Metazoa			Chordata	Craniata
FAQQLCTALLFLATPELSIIHCDLKPENILLCNPK	Eukaryota	Metazoa			Chordata	Craniata
FCIWTEGAFR	Eukaryota	Metazoa			Chordata	Craniata
FENVNGFTNCCFGFHR	Eukaryota	Metazoa			Chordata	Craniata
FHEFLGNSWGILFSHPR	Eukaryota	Metazoa			Chordata	Craniata
FLEGELIHDLLTIFVSAK	Eukaryota	Metazoa			Chordata	Craniata
FQDNLDFIQWFK	Eukaryota	Metazoa			Chordata	Craniata
FTLDCTHPVEDGIMDAANFEQFLQER	Eukaryota	Metazoa			Chordata	Craniata
FVIHPETNNLILIETDHNAYTEATK	Eukaryota	Metazoa			Chordata	Craniata
FVSDENLVHFLLDEIVGSAAHR	Eukaryota	Metazoa			Chordata	Craniata
GAVLPHFNVLFDGLSK	Eukaryota	Metazoa			Chordata	Craniata
GEMLDLQHGSLFLK	Eukaryota	Metazoa			Chordata	Craniata
GFDALQYQEHLDYEIIQSLNPEFNK	Eukaryota	Metazoa			Chordata	Craniata
GIVWGEDTLMEYLENPK	Eukaryota	Metazoa			Chordata	Craniata
GNTTVHVCWHR	Eukaryota	Metazoa			Chordata	Craniata
GYEEWLLTEIR	Eukaryota	Metazoa			Chordata	Craniata
HEAIETDIAAYEER	Eukaryota	Metazoa			Chordata	Craniata
HELLNLSSSNHLEK	Eukaryota	Metazoa			Chordata	Craniata
HELQIYEEVAR	Eukaryota	Metazoa			Chordata	Craniata
HENFHGGLDAISVGDGLFTILTTLSK	Eukaryota	Metazoa			Chordata	Craniata
HETMITDLEDR	Eukaryota	Metazoa			Chordata	Craniata
HFDADGNGYIEGK	Eukaryota	Metazoa			Chordata	Craniata
HFQEFVPLR	Eukaryota	Metazoa			Chordata	Craniata
HGLLVPNNTTDQELQHIR	Eukaryota	Metazoa			Chordata	Craniata
HLCEPGADGAETFADGVPR	Eukaryota	Metazoa			Chordata	Craniata
HLIIGVSSDR	Eukaryota	Metazoa			Chordata	Craniata
HIYYITGETK	Eukaryota	Metazoa			Chordata	Craniata
IEAQNKPFDAK	Eukaryota	Metazoa			Chordata	Craniata
IEASLQHEITR	Eukaryota	Metazoa			Chordata	Craniata
LEDTHFVQCPSVPSHK	Eukaryota	Metazoa			Chordata	Craniata
LEQQVDDLEGSLEQEK	Eukaryota	Metazoa			Chordata	Craniata
LFIGGLSFETTDDSLR	Eukaryota	Metazoa			Chordata	Craniata
LFIGGLSFETTDESLR	Eukaryota	Metazoa			Chordata	Craniata
IFSAEIIYHLFDAFTK	Eukaryota	Metazoa			Chordata	Craniata
LGVNNISGIEEVNMFTNQGTVIHFNNPK	Eukaryota	Metazoa			Chordata	Craniata
IHEDIFDIIDR	Eukaryota	Metazoa			Chordata	Craniata
LLETIDQLYLEFAK	Eukaryota	Metazoa			Chordata	Craniata
LLGSLDIDHNQYK	Eukaryota	Metazoa			Chordata	Craniata
LLLNNDNLLR	Eukaryota	Metazoa			Chordata	Craniata
INCEIIGASVDSHFCHLAWTK	Eukaryota	Metazoa			Chordata	Craniata
LNEHYVNTTDFLDAIK	Eukaryota	Metazoa			Chordata	Craniata
IQDLSLLYQLFSR	Eukaryota	Metazoa			Chordata	Craniata
IQRPPEDSIQPYEK	Eukaryota	Metazoa			Chordata	Craniata
ITGMLLEIDNSELLHMLESPESLR	Eukaryota	Metazoa			Chordata	Craniata
LVEVGPAGAQFLGPVIVEIPHFGSMR	Eukaryota	Metazoa			Chordata	Craniata
LVKPGNQNTQVTEAWNK	Eukaryota	Metazoa			Chordata	Craniata
IVVVTAGVR	Eukaryota	Metazoa			Chordata	Craniata
LWSHVYAGAPVSSPEYTR	Eukaryota	Metazoa			Chordata	Craniata
LYGPTNFSPIINHVAR	Eukaryota	Metazoa			Chordata	Craniata
MALELLTQEFGIPIER	Eukaryota	Metazoa			Chordata	Craniata
MEGDLNEMEIQLSHANR	Eukaryota	Metazoa			Chordata	Craniata
NFEATLAWLQEHACSR	Eukaryota	Metazoa			Chordata	Craniata
NICYVITHGEEK	Eukaryota	Metazoa			Chordata	Craniata
NLDDGLDDER	Eukaryota	Metazoa			Chordata	Craniata
NLHQSGFSLSGAQVDDNIPR	Eukaryota	Metazoa			Chordata	Craniata
NLIDFFELR	Eukaryota	Metazoa			Chordata	Craniata
NTCQLFIQTDHLFFK	Eukaryota	Metazoa			Chordata	Craniata
NVFDEAILAALEPPETQR	Eukaryota	Metazoa			Chordata	Craniata
NVFSFYLNR	Eukaryota	Metazoa			Chordata	Craniata
QADSVAELGEQIDNLQR	Eukaryota	Metazoa			Chordata	Craniata
QAYTQQIEELK	Eukaryota	Metazoa			Chordata	Craniata
QDLLTAAPASEIAEGLNLHTIR	Eukaryota	Metazoa			Chordata	Craniata
QELEDLTADIK	Eukaryota	Metazoa			Chordata	Craniata
QELIEAFVEHR	Eukaryota	Metazoa			Chordata	Craniata
QMDLLQEFYETTLEALK	Eukaryota	Metazoa			Chordata	Craniata
SALDVLSQLLELATLHDIGK	Eukaryota	Metazoa			Chordata	Craniata
SAQFEHTLLVTETGCEILTR	Eukaryota	Metazoa			Chordata	Craniata
SGILPILVHCLDR	Eukaryota	Metazoa			Chordata	Craniata
SGPFGQVFRPDNFVFGQSGAGNNWAK	Eukaryota	Metazoa			Chordata	Craniata
SHCYVTYSTVEEAVATR	Eukaryota	Metazoa			Chordata	Craniata
SHNNFVAIIDLPEGEHQYK	Eukaryota	Metazoa			Chordata	Craniata
SLQSLEASLHAMESTR	Eukaryota	Metazoa			Chordata	Craniata
SPNIQFEAFHVFK	Eukaryota	Metazoa			Chordata	Craniata
SSFVMDEFK	Eukaryota	Metazoa			Chordata	Craniata
SVNHGFCFNILCVGETGLGK	Eukaryota	Metazoa			Chordata	Craniata
SYDATTHFETTCNDIK	Eukaryota	Metazoa			Chordata	Craniata
TELEDTLDSTAAQQELR	Eukaryota	Metazoa			Chordata	Craniata
TFQECYGGNFLAHWNR	Eukaryota	Metazoa			Chordata	Craniata
TGDLGDIK	Eukaryota	Metazoa			Chordata	Craniata
THYIIGYNLPSYEYLYNLGDQYALK	Eukaryota	Metazoa			Chordata	Craniata
TICSHVQNMIK	Eukaryota	Metazoa			Chordata	Craniata
TSAYAFFVQTCR	Eukaryota	Metazoa			Chordata	Craniata
VECGAWVGFEHSTFNGQQFILEK	Eukaryota	Metazoa			Chordata	Craniata
VESGAWVGYEHHDFQGQQFILER	Eukaryota	Metazoa			Chordata	Craniata
VFAENETGISRPR	Eukaryota	Metazoa			Chordata	Craniata
VHVFYIDYGNR	Eukaryota	Metazoa			Chordata	Craniata
VLDELTMTR	Eukaryota	Metazoa			Chordata	Craniata
VLDLIYWR	Eukaryota	Metazoa			Chordata	Craniata
VLIDWINDVLVGER	Eukaryota	Metazoa			Chordata	Craniata
VLTDAVDDITSIDDFLCVSENHILEDVNK	Eukaryota	Metazoa			Chordata	Craniata
VQASLAANTFTITGHAETK	Eukaryota	Metazoa			Chordata	Craniata
VSIEPNFHSLYSNFLDTLK	Eukaryota	Metazoa			Chordata	Craniata
VTVLFAGQHISK	Eukaryota	Metazoa			Chordata	Craniata
YPDSHQLFVGNLPHDIDESELK	Eukaryota	Metazoa			Chordata	Craniata
YSVLSELYELIGFHR	Eukaryota	Metazoa			Chordata	Craniata
AAHLCAEAALR	Eukaryota	Metazoa			Chordata	Craniata
ADATNVNNWHWTER	Eukaryota	Metazoa			Chordata	Craniata
AGHWIVLDELNLASQSVLEGLNACFDHR	Eukaryota	Metazoa			Chordata	Craniata
AIAHYEQAADYYK	Eukaryota	Metazoa			Chordata	Craniata
AIGTEPDSDVLSEIMHSFAK	Eukaryota	Metazoa			Chordata	Craniata
ALQEAHQQTLDDLQAEEDK	Eukaryota	Metazoa			Chordata	Craniata
ALSDHHVYLEGTLLKPNMVTAGHSCTK	Eukaryota	Metazoa			Chordata	Craniata
AISEELDHALNDMTSI	Eukaryota	Metazoa			Chordata	Craniata
AISHSNVVINLVGR	Eukaryota	Metazoa			Chordata	Craniata
DDELTHLYTLILRPDQTYEVK	Eukaryota	Metazoa			Chordata	Craniata
DFNVGGYIQAVLDR	Eukaryota	Metazoa			Chordata	Craniata
DFSSVFQFLR	Eukaryota	Metazoa			Chordata	Craniata
DKPTYDEIFYTLSPVNGK	Eukaryota	Metazoa			Chordata	Craniata
DILMVVGNEIIEAPMAWR	Eukaryota	Metazoa			Chordata	Craniata
DMIDLEATFEK	Eukaryota	Metazoa			Chordata	Craniata
DNTVEHLLPLFLAQLK	Eukaryota	Metazoa			Chordata	Craniata
DPEFVFYDQLK	Eukaryota	Metazoa			Chordata	Craniata
DWTVHSWIR	Eukaryota	Metazoa			Chordata	Craniata
DYSVTANSR	Eukaryota	Metazoa			Chordata	Craniata
EAFQNAYLELGGLGER	Eukaryota	Metazoa			Chordata	Craniata
ECLQALEFLHANQVIHR	Eukaryota	Metazoa			Chordata	Craniata
EDGAISTLVIR	Eukaryota	Metazoa			Chordata	Craniata
EDLDVIGVSFR	Eukaryota	Metazoa			Chordata	Craniata
EDILNFIAK	Eukaryota	Metazoa			Chordata	Craniata
EEISLLEDLNQVIENR	Eukaryota	Metazoa			Chordata	Craniata
EETDFEHR	Eukaryota	Metazoa			Chordata	Craniata
EFGPVIIDYGK	Eukaryota	Metazoa			Chordata	Craniata
EHEVTIFVR	Eukaryota	Metazoa			Chordata	Craniata
EHFQDDVFNEK	Eukaryota	Metazoa			Chordata	Craniata
EHVEEINELFYDAK	Eukaryota	Metazoa			Chordata	Craniata
ELWAVLNGWK	Eukaryota	Metazoa			Chordata	Craniata
EPFFHGQDNYDQLVR	Eukaryota	Metazoa			Chordata	Craniata
EQSILELGGLLAK	Eukaryota	Metazoa			Chordata	Craniata
FAAGEEMLVTVLSAMGEESAVALKPMTK	Eukaryota	Metazoa			Chordata	Craniata
FGNLYNAAAILGNPMVAAHGK	Eukaryota	Metazoa			Chordata	Craniata
FLDTAFNLDAFK	Eukaryota	Metazoa			Chordata	Craniata
FLVQNVHTLAELK	Eukaryota	Metazoa			Chordata	Craniata
FNNLEGFLEEFADIAK	Eukaryota	Metazoa			Chordata	Craniata
FSMVIPELEAALAEIPGVR	Eukaryota	Metazoa			Chordata	Craniata
GAVDGGLSIPHSTK	Eukaryota	Metazoa			Chordata	Craniata
GEYPDFQHWAGFNDCIR	Eukaryota	Metazoa			Chordata	Craniata
GGENIYPAEIEQFLHTHPK	Eukaryota	Metazoa			Chordata	Craniata
GHEGVMYYVEK	Eukaryota	Metazoa			Chordata	Craniata
GIFEALRPLETLPVEGLIR	Eukaryota	Metazoa			Chordata	Craniata
GLIDQSALDQYR	Eukaryota	Metazoa			Chordata	Craniata
GSQECFQFILPALPHAIDLLR	Eukaryota	Metazoa			Chordata	Craniata
GVSVHISNAEPK	Eukaryota	Metazoa			Chordata	Craniata
HLIPAANSGESK	Eukaryota	Metazoa			Chordata	Craniata
HSQFIGYPITLYVEK	Eukaryota	Metazoa			Chordata	Craniata
HVEEGNVTVQHAALSALR	Eukaryota	Metazoa			Chordata	Craniata
KPLVIVAEDVDGEALSTLVLNR	Eukaryota	Metazoa			Chordata	Craniata
LAQESIMDLENDK	Eukaryota	Metazoa			Chordata	Craniata
LAYLLQQTDEYVANLTELVR	Eukaryota	Metazoa			Chordata	Craniata
IDDLNAGLLNLSELHAFQLR	Eukaryota	Metazoa			Chordata	Craniata
LDILDVLDEIK	Eukaryota	Metazoa			Chordata	Craniata
LDPELHLDIK	Eukaryota	Metazoa			Chordata	Craniata
IDYVLQEKPIESFNEYLFALQSHLCYWESEDTALLLLK	Eukaryota	Metazoa			Chordata	Craniata
LFPLIQNMHPSLAGK	Eukaryota	Metazoa			Chordata	Craniata
LGDAVEQGVINNSVLGYFIGR	Eukaryota	Metazoa			Chordata	Craniata
IGGTNAEVMPAQWEFQIGPCEGIDMGDHLWVAR	Eukaryota	Metazoa			Chordata	Craniata
LGHDYQWIGLNDK	Eukaryota	Metazoa			Chordata	Craniata
LHDAIVEVVTSLLR	Eukaryota	Metazoa			Chordata	Craniata
LLADCLTIVVAAQMGAGFTPEVQAAFQK	Eukaryota	Metazoa			Chordata	Craniata
LLDSSTVTHLFR	Eukaryota	Metazoa			Chordata	Craniata
LLVELVEFISPK	Eukaryota	Metazoa			Chordata	Craniata
LNWLSVDFNNWK	Eukaryota	Metazoa			Chordata	Craniata
IPEELKPWLVDDWDLITR	Eukaryota	Metazoa			Chordata	Craniata
LQNEIEDLMVDVER	Eukaryota	Metazoa			Chordata	Craniata
LTDTTVLGCSGFHGDCLTLTK	Eukaryota	Metazoa			Chordata	Craniata
ITFVDFIMYELLDQHR	Eukaryota	Metazoa			Chordata	Craniata
ITLVDESDLYNWEVAIFGPPNTHYEGGYFK	Eukaryota	Metazoa			Chordata	Craniata
LVEDHLAVQSLIR	Eukaryota	Metazoa			Chordata	Craniata
MWYFGPGEYR	Eukaryota	Metazoa			Chordata	Craniata
NDLGHPFCDNLR	Eukaryota	Metazoa			Chordata	Craniata
NGELLFVHSAEGSEFWSALLEK	Eukaryota	Metazoa			Chordata	Craniata
NNLCIENACIAAHDK	Eukaryota	Metazoa			Chordata	Craniata
NQALNTDNYGHDLASVQALQR	Eukaryota	Metazoa			Chordata	Craniata
NSEQIVDVGEELINEHASK	Eukaryota	Metazoa			Chordata	Craniata
NYDPTLHPFEVPR	Eukaryota	Metazoa			Chordata	Craniata
QAHLCVLAANCDEPMYVK	Eukaryota	Metazoa			Chordata	Craniata
QHDVEVDATLK	Eukaryota	Metazoa			Chordata	Craniata
QNHESVQWCYDNFINYR	Eukaryota	Metazoa			Chordata	Craniata
QPALDVLYDVIK	Eukaryota	Metazoa			Chordata	Craniata
SCTVNILFGTPQEHR	Eukaryota	Metazoa			Chordata	Craniata
SICNDILDVLDK	Eukaryota	Metazoa			Chordata	Craniata
SLHDALCVLAQTVK	Eukaryota	Metazoa			Chordata	Craniata
SNAHYNLQNAFNLAEQHLGLTK	Eukaryota	Metazoa			Chordata	Craniata
SSILLDVKPWDDETDMSK	Eukaryota	Metazoa			Chordata	Craniata
TAGYPNVNIHNFTTSWR	Eukaryota	Metazoa			Chordata	Craniata
TLAGLPLLVAHK	Eukaryota	Metazoa			Chordata	Craniata
TLGVDLVALATR	Eukaryota	Metazoa			Chordata	Craniata
TLHVEEVVPNVIEPSFGIGR	Eukaryota	Metazoa			Chordata	Craniata
TIIQYIDNQFER	Eukaryota	Metazoa			Chordata	Craniata
TSPDAFIQLALQLAHYR	Eukaryota	Metazoa			Chordata	Craniata
TVFETLDIGWQLLR	Eukaryota	Metazoa			Chordata	Craniata
VELSISCNNLLDK	Eukaryota	Metazoa			Chordata	Craniata
VESGSLEEDWDFLPSK	Eukaryota	Metazoa			Chordata	Craniata
VIFHPEFLSSTSPLLPMDYEEFVR	Eukaryota	Metazoa			Chordata	Craniata
VLLSICSLLCDPNPDDPLVPEIAHTYK	Eukaryota	Metazoa			Chordata	Craniata
VLTLSEDSPYETLHSFISNAVAPYFK	Eukaryota	Metazoa			Chordata	Craniata
VSLTSNPVSWVNNFGHEGLGLLLDALER	Eukaryota	Metazoa			Chordata	Craniata
VSVAGHSLGSLILFDLLSNQK	Eukaryota	Metazoa			Chordata	Craniata
VTYHPDGPEGQAYEIDFTPPFR	Eukaryota	Metazoa			Chordata	Craniata
VVGVLLGSWQK	Eukaryota	Metazoa			Chordata	Craniata
WIGLDLVNGKPR	Eukaryota	Metazoa			Chordata	Craniata
WLILQELTK	Eukaryota	Metazoa			Chordata	Craniata
WQALLVQIR	Eukaryota	Metazoa			Chordata	Craniata
WQNVHFHCSGAPAAPLQ	Eukaryota	Metazoa			Chordata	Craniata
YATDTFAGLCHQLTNALVER	Eukaryota	Metazoa			Chordata	Craniata
YGLKPNDQILAEEK	Eukaryota	Metazoa			Chordata	Craniata
YHDCGGQQQSPIDIQR	Eukaryota	Metazoa			Chordata	Craniata
YIAFDFHK	Eukaryota	Metazoa			Chordata	Craniata
ADLWSFGITAIELATGAAPYHK	Eukaryota	Metazoa			Chordata	Craniata
ARPFPDGLAEDIDK	Eukaryota	Metazoa			Chordata	Craniata
CDLVNYSYGEATHWPNSGR	Eukaryota	Metazoa			Chordata	Craniata
DFNIILDDVAITELSFSR	Eukaryota	Metazoa			Chordata	Craniata
DLKPSNILYVDESGNPESIR	Eukaryota	Metazoa			Chordata	Craniata
DPIDPPWAPGKPTVK	Eukaryota	Metazoa			Chordata	Craniata
EASGPINFTVFLTMFGEK	Eukaryota	Metazoa			Chordata	Craniata
EEEELIALK	Eukaryota	Metazoa			Chordata	Craniata
EFNHINLELSLLGK	Eukaryota	Metazoa			Chordata	Craniata
EYLNLLICEENHLK	Eukaryota	Metazoa			Chordata	Craniata
FDLFDFCYHLLK	Eukaryota	Metazoa			Chordata	Craniata
FHTEALTALLSDDSK	Eukaryota	Metazoa			Chordata	Craniata
FYVWEILHSTIR	Eukaryota	Metazoa			Chordata	Craniata
GALQYLVPILTQTLTK	Eukaryota	Metazoa			Chordata	Craniata
GHAAPILYAAWAEAGYIK	Eukaryota	Metazoa			Chordata	Craniata
GIEKPPFELPEFIR	Eukaryota	Metazoa			Chordata	Craniata
GWLYYEAGQR	Eukaryota	Metazoa			Chordata	Craniata
HIADLAGNPDVILPVPAFNVINGGSHAGNK	Eukaryota	Metazoa			Chordata	Craniata
HLEEAFTSEHWLVR	Eukaryota	Metazoa			Chordata	Craniata
HLQEYQDLLNVK	Eukaryota	Metazoa			Chordata	Craniata
LAQQYFLVYQEPIPTGQLVQR	Eukaryota	Metazoa			Chordata	Craniata
LASADIETYLLEK	Eukaryota	Metazoa			Chordata	Craniata
LCDEQLSSQSHYDFGLR	Eukaryota	Metazoa			Chordata	Craniata
LDSASAFQGAIISPHYDSLLVK	Eukaryota	Metazoa			Chordata	Craniata
IHWWENVYGFDMSCIK	Eukaryota	Metazoa			Chordata	Craniata
INFDVNGYIVGANIETYLLEK	Eukaryota	Metazoa			Chordata	Craniata
INPVCPADLVIDHSIQVDFNR	Eukaryota	Metazoa			Chordata	Craniata
LQEAPDAVPHGEMPR	Eukaryota	Metazoa			Chordata	Craniata
LSVQTNEAILLALYEAVHLNR	Eukaryota	Metazoa			Chordata	Craniata
ITVYDQEHFQGR	Eukaryota	Metazoa			Chordata	Craniata
LYDLNHNEIGELIR	Eukaryota	Metazoa			Chordata	Craniata
NDPPMEAANFTSQVIILNHPGQISQGYAPVLDR	Eukaryota	Metazoa			Chordata	Craniata
NMLHITDTGIGMTK	Eukaryota	Metazoa			Chordata	Craniata
NSLHIVDFLVQNSGNLDK	Eukaryota	Metazoa			Chordata	Craniata
NYITAEELR	Eukaryota	Metazoa			Chordata	Craniata
QLLELPLNLTIVSPAHTPNWDLVSDVVNSCSR	Eukaryota	Metazoa			Chordata	Craniata
QTNHCYIAILNIIQGEVDPTQVHK	Eukaryota	Metazoa			Chordata	Craniata
SLDLVESLLR	Eukaryota	Metazoa			Chordata	Craniata
SIIEEYLHINDLK	Eukaryota	Metazoa			Chordata	Craniata
VGYTPDWIFLLR	Eukaryota	Metazoa			Chordata	Craniata
ADELLQLALATPESSEGVEAAR	Bacteria				Gemmatimonadetes			Gemmatimonadetes
ALGASGIGAEVALLSGK	Bacteria				Gemmatimonadetes			Gemmatimonadetes
APGATLQTTGLVHEAYLK	Bacteria				Gemmatimonadetes			Gemmatimonadetes
GAGALLVTIGGR	Bacteria				Gemmatimonadetes			Gemmatimonadetes
MAAGPAIMYLVNTVAGGAFALAFMLR	Bacteria				Gemmatimonadetes			Gemmatimonadetes
TFPNHYTIVTGLYPGDHGIVANTFWDPVR	Bacteria				Gemmatimonadetes			Gemmatimonadetes
AGAAADAALVPVGFVLNTVADATVSR	Bacteria				Gemmatimonadetes			Gemmatimonadetes
LAELAEGGFQPVIPDPR	Bacteria				Gemmatimonadetes			Gemmatimonadetes
ILYACPNLEAVYDVVR	Bacteria				Gemmatimonadetes			Gemmatimonadetes
LSATSAAGAIAASSASLSFR	Bacteria				Gemmatimonadetes			Gemmatimonadetes
ITVNNIAPGAIATPINR	Bacteria				Gemmatimonadetes			Gemmatimonadetes
THATNHPGFLIIDEPQQQHPSLESFGALLR	Bacteria				Gemmatimonadetes			Gemmatimonadetes
TTGHEAAELASMSMELLAAPSLARPVGFYDDDDAR	Bacteria				Gemmatimonadetes			Gemmatimonadetes
VALDASSLDAGAAAILGVLDR	Bacteria				Gemmatimonadetes			Gemmatimonadetes
VPMATTNLFTDPAFK	Bacteria				Gemmatimonadetes			Gemmatimonadetes
WLALAGLDTWLFGDFLR	Bacteria				Gemmatimonadetes			Gemmatimonadetes
ADIAESQVNK	Eukaryota	Metazoa
AFVAIGDYNGHVGLGVK	Eukaryota	Metazoa
AMGIMNSFVNDIFER	Eukaryota	Metazoa
AVGIDLGTTYSCVGVFQHGK	Eukaryota	Metazoa
AYHEQLSVADITNACFEPANQMVK	Eukaryota	Metazoa
DFTLEFSR	Eukaryota	Metazoa
DLISSLTSGLLTIGDR	Eukaryota	Metazoa
DVATVAFCDAQSTQEIHEK	Eukaryota	Metazoa
ECPADECGAGVFMASHFDR	Eukaryota	Metazoa
EGNDLYHEMIESGVINLK	Eukaryota	Metazoa
EHLELFWSR	Eukaryota	Metazoa
ESELLEPLMPAIR	Eukaryota	Metazoa
FAPQFSGYQQQDSQELLAFLLDGLHEDLNR	Eukaryota	Metazoa
FDDGVVQSDMK	Eukaryota	Metazoa
GAGAFGYFEVTHDITR	Eukaryota	Metazoa
GHALLILRPEELGFLR	Eukaryota	Metazoa
GLCGAIHSSVAK	Eukaryota	Metazoa
GIPDFWLTIFK	Eukaryota	Metazoa
GISDLAQHYLMK	Eukaryota	Metazoa
GSYVSIHSSGFR	Eukaryota	Metazoa
HAFEIIHLLTGENPLQILVNAIINSGPR	Eukaryota	Metazoa
HAFQAEVNR	Eukaryota	Metazoa
HCILDVSGNAIK	Eukaryota	Metazoa
HHCPNTPIILVGTK	Eukaryota	Metazoa
HIADLAGNPEVILPVPAFNVINGGSHAGNK	Eukaryota	Metazoa
HTYLPLEVCNIVAGQR	Eukaryota	Metazoa
LDIFEFLNHVEDGLK	Eukaryota	Metazoa
IEEGHVGVYYR	Eukaryota	Metazoa
IEITFPAEYPFKPPK	Eukaryota	Metazoa
LEPHQIQGLDFIHIFPVVQWLVK	Eukaryota	Metazoa
LEVEANNAFDQYR	Eukaryota	Metazoa
LFDLLDVLEFNQVVIFVK	Eukaryota	Metazoa
IFHTVTTTDDPVIR	Eukaryota	Metazoa
IFLSWEPPK	Eukaryota	Metazoa
[truncated: 798 more rows]

## Sheet: Infected Immersion - Immersion
Immersion
peptide	superkingdom	kingdom	subkingdom	superphylum	phylum	subphylum	superclass	class_	subclass	infraclass	superorder	order	suborder	infraorder	parvorder	superfamily	family	subfamily	tribe	subtribe	genus	subgenus	species_group	species_subgroup	species	subspecies	varietas	forma
AADIECHLQPTVIDCMR	Eukaryota	Metazoa			Chordata	Craniata	Actinopterygii	Actinopteri	Neopterygii	Teleostei	Cypriniphysae	Cypriniformes				Cyprinoidea	Cyprinidae				Danio				Danio rerio
AAILLVDVLNIFCK	Eukaryota	Metazoa			Chordata	Craniata	Actinopterygii	Actinopteri	Neopterygii	Teleostei	Cypriniphysae	Cypriniformes				Cyprinoidea	Cyprinidae				Danio				Danio rerio
AAVPSIQHCLDNCAK	Eukaryota	Metazoa			Chordata	Craniata	Actinopterygii	Actinopteri	Neopterygii	Teleostei	Cypriniphysae	Cypriniformes				Cyprinoidea	Cyprinidae				Danio				Danio rerio
ADQGLPVLGHVAAVLLCFEPSGSGVYGSK	Eukaryota	Metazoa			Chordata	Craniata	Actinopterygii	Actinopteri	Neopterygii	Teleostei	Cypriniphysae	Cypriniformes				Cyprinoidea	Cyprinidae				Danio				Danio rerio
AEARPSIAIHK	Eukaryota	Metazoa			Chordata	Craniata	Actinopterygii	Actinopteri	Neopterygii	Teleostei	Cypriniphysae	Cypriniformes				Cyprinoidea	Cyprinidae				Danio				Danio rerio
AELGWITVTSILR	Eukaryota	Metazoa			Chordata	Craniata	Actinopterygii	Actinopteri	Neopterygii	Teleostei	Cypriniphysae	Cypriniformes				Cyprinoidea	Cyprinidae				Danio				Danio rerio
AENNSWVTPIADQFQLGISHVFEYIR	Eukaryota	Metazoa			Chordata	Craniata	Actinopterygii	Actinopteri	Neopterygii	Teleostei	Cypriniphysae	Cypriniformes				Cyprinoidea	Cyprinidae				Danio				Danio rerio
AEYEGDGEPTIFVAVAGR	Eukaryota	Metazoa			Chordata	Craniata	Actinopterygii	Actinopteri	Neopterygii	Teleostei	Cypriniphysae	Cypriniformes				Cyprinoidea	Cyprinidae				Danio				Danio rerio
AFSDPFVQNLKPSLVYDLAQMPSGTTGLK	Eukaryota	Metazoa			Chordata	Craniata	Actinopterygii	Actinopteri	Neopterygii	Teleostei	Cypriniphysae	Cypriniformes				Cyprinoidea	Cyprinidae				Danio				Danio rerio
AGGDLDPLFVVEVLVHCSK	Eukaryota	Metazoa			Chordata	Craniata	Actinopterygii	Actinopteri	Neopterygii	Teleostei	Cypriniphysae	Cypriniformes				Cyprinoidea	Cyprinidae				Danio				Danio rerio
AGVLALANLLK	Eukaryota	Metazoa			Chordata	Craniata	Actinopterygii	Actinopteri	Neopterygii	Teleostei	Cypriniphysae	Cypriniformes				Cyprinoidea	Cyprinidae				Danio				Danio rerio
AGVTHWHAGLIEAAHGLICR	Eukaryota	Metazoa			Chordata	Craniata	Actinopterygii	Actinopteri	Neopterygii	Teleostei	Cypriniphysae	Cypriniformes				Cyprinoidea	Cyprinidae				Danio				Danio rerio
AHDGGIYAVSWSPDSTQLISASGDR	Eukaryota	Metazoa			Chordata	Craniata	Actinopterygii	Actinopteri	Neopterygii	Teleostei	Cypriniphysae	Cypriniformes				Cyprinoidea	Cyprinidae				Danio				Danio rerio
AHIVFNFHQAVDGIQEQLR	Eukaryota	Metazoa			Chordata	Craniata	Actinopterygii	Actinopteri	Neopterygii	Teleostei	Cypriniphysae	Cypriniformes				Cyprinoidea	Cyprinidae				Danio				Danio rerio
AHYMTQPLAYHTPDCSCQGFIDLPEFPFALEPR	Eukaryota	Metazoa			Chordata	Craniata	Actinopterygii	Actinopteri	Neopterygii	Teleostei	Cypriniphysae	Cypriniformes				Cyprinoidea	Cyprinidae				Danio				Danio rerio
AIEQFGAVIEELLLK	Eukaryota	Metazoa			Chordata	Craniata	Actinopterygii	Actinopteri	Neopterygii	Teleostei	Cypriniphysae	Cypriniformes				Cyprinoidea	Cyprinidae				Danio				Danio rerio
ALPTDKPLASAYLK	Eukaryota	Metazoa			Chordata	Craniata	Actinopterygii	Actinopteri	Neopterygii	Teleostei	Cypriniphysae	Cypriniformes				Cyprinoidea	Cyprinidae				Danio				Danio rerio
ALQEGVAFQYAKPLLAAEVR	Eukaryota	Metazoa			Chordata	Craniata	Actinopterygii	Actinopteri	Neopterygii	Teleostei	Cypriniphysae	Cypriniformes				Cyprinoidea	Cyprinidae				Danio				Danio rerio
AISALCAVYEHWVPK	Eukaryota	Metazoa			Chordata	Craniata	Actinopterygii	Actinopteri	Neopterygii	Teleostei	Cypriniphysae	Cypriniformes				Cyprinoidea	Cyprinidae				Danio				Danio rerio
AISHLNNNFLFNQK	Eukaryota	Metazoa			Chordata	Craniata	Actinopterygii	Actinopteri	Neopterygii	Teleostei	Cypriniphysae	Cypriniformes				Cyprinoidea	Cyprinidae				Danio				Danio rerio
ALSLPFIDEFPFDLQHMK	Eukaryota	Metazoa			Chordata	Craniata	Actinopterygii	Actinopteri	Neopterygii	Teleostei	Cypriniphysae	Cypriniformes				Cyprinoidea	Cyprinidae				Danio				Danio rerio
ALVAEFLEQNYDAVFDNYEK	Eukaryota	Metazoa			Chordata	Craniata	Actinopterygii	Actinopteri	Neopterygii	Teleostei	Cypriniphysae	Cypriniformes				Cyprinoidea	Cyprinidae				Danio				Danio rerio
AMGSLFSLVCSLYK	Eukaryota	Metazoa			Chordata	Craniata	Actinopterygii	Actinopteri	Neopterygii	Teleostei	Cypriniphysae	Cypriniformes				Cyprinoidea	Cyprinidae				Danio				Danio rerio
ANSFIIGLEEELAPHLAFVGASVK	Eukaryota	Metazoa			Chordata	Craniata	Actinopterygii	Actinopteri	Neopterygii	Teleostei	Cypriniphysae	Cypriniformes				Cyprinoidea	Cyprinidae				Danio				Danio rerio
AQELYEWIK	Eukaryota	Metazoa			Chordata	Craniata	Actinopterygii	Actinopteri	Neopterygii	Teleostei	Cypriniphysae	Cypriniformes				Cyprinoidea	Cyprinidae				Danio				Danio rerio
AQLTLQIIELPGPPASVK	Eukaryota	Metazoa			Chordata	Craniata	Actinopterygii	Actinopteri	Neopterygii	Teleostei	Cypriniphysae	Cypriniformes				Cyprinoidea	Cyprinidae				Danio				Danio rerio
ASASLHLGR	Eukaryota	Metazoa			Chordata	Craniata	Actinopterygii	Actinopteri	Neopterygii	Teleostei	Cypriniphysae	Cypriniformes				Cyprinoidea	Cyprinidae				Danio				Danio rerio
ASDGHVLTEVNEAPTANDKPK	Eukaryota	Metazoa			Chordata	Craniata	Actinopterygii	Actinopteri	Neopterygii	Teleostei	Cypriniphysae	Cypriniformes				Cyprinoidea	Cyprinidae				Danio				Danio rerio
ATELWQWLMTLEAEK	Eukaryota	Metazoa			Chordata	Craniata	Actinopterygii	Actinopteri	Neopterygii	Teleostei	Cypriniphysae	Cypriniformes				Cyprinoidea	Cyprinidae				Danio				Danio rerio
AVSAAAGIVTQALSDLLTHVR	Eukaryota	Metazoa			Chordata	Craniata	Actinopterygii	Actinopteri	Neopterygii	Teleostei	Cypriniphysae	Cypriniformes				Cyprinoidea	Cyprinidae				Danio				Danio rerio
CEEWTIAVPGPPHDLQVQEVR	Eukaryota	Metazoa			Chordata	Craniata	Actinopterygii	Actinopteri	Neopterygii	Teleostei	Cypriniphysae	Cypriniformes				Cyprinoidea	Cyprinidae				Danio				Danio rerio
CEHGTFGFDSCTGCR	Eukaryota	Metazoa			Chordata	Craniata	Actinopterygii	Actinopteri	Neopterygii	Teleostei	Cypriniphysae	Cypriniformes				Cyprinoidea	Cyprinidae				Danio				Danio rerio
CELMACEFAHK	Eukaryota	Metazoa			Chordata	Craniata	Actinopterygii	Actinopteri	Neopterygii	Teleostei	Cypriniphysae	Cypriniformes				Cyprinoidea	Cyprinidae				Danio				Danio rerio
CIDLVIQELINTFR	Eukaryota	Metazoa			Chordata	Craniata	Actinopterygii	Actinopteri	Neopterygii	Teleostei	Cypriniphysae	Cypriniformes				Cyprinoidea	Cyprinidae				Danio				Danio rerio
CIGGVIFFHETLYQNTDDGTNFAQLIK	Eukaryota	Metazoa			Chordata	Craniata	Actinopterygii	Actinopteri	Neopterygii	Teleostei	Cypriniphysae	Cypriniformes				Cyprinoidea	Cyprinidae				Danio				Danio rerio
CSANISVHEEALK	Eukaryota	Metazoa			Chordata	Craniata	Actinopterygii	Actinopteri	Neopterygii	Teleostei	Cypriniphysae	Cypriniformes				Cyprinoidea	Cyprinidae				Danio				Danio rerio
CTFIDDFAPYHK	Eukaryota	Metazoa			Chordata	Craniata	Actinopterygii	Actinopteri	Neopterygii	Teleostei	Cypriniphysae	Cypriniformes				Cyprinoidea	Cyprinidae				Danio				Danio rerio
DAADIEWYHAANSK	Eukaryota	Metazoa			Chordata	Craniata	Actinopterygii	Actinopteri	Neopterygii	Teleostei	Cypriniphysae	Cypriniformes				Cyprinoidea	Cyprinidae				Danio				Danio rerio
DAIQLIIQIAAANGIGR	Eukaryota	Metazoa			Chordata	Craniata	Actinopterygii	Actinopteri	Neopterygii	Teleostei	Cypriniphysae	Cypriniformes				Cyprinoidea	Cyprinidae				Danio				Danio rerio
DATIEIITLDKPGPPTGPVR	Eukaryota	Metazoa			Chordata	Craniata	Actinopterygii	Actinopteri	Neopterygii	Teleostei	Cypriniphysae	Cypriniformes				Cyprinoidea	Cyprinidae				Danio				Danio rerio
DAVDKPDGLAVVGVFLK	Eukaryota	Metazoa			Chordata	Craniata	Actinopterygii	Actinopteri	Neopterygii	Teleostei	Cypriniphysae	Cypriniformes				Cyprinoidea	Cyprinidae				Danio				Danio rerio
DELFVLEQSHPQVVLTAGNDR	Eukaryota	Metazoa			Chordata	Craniata	Actinopterygii	Actinopteri	Neopterygii	Teleostei	Cypriniphysae	Cypriniformes				Cyprinoidea	Cyprinidae				Danio				Danio rerio
DELLPHLLPVLK	Eukaryota	Metazoa			Chordata	Craniata	Actinopterygii	Actinopteri	Neopterygii	Teleostei	Cypriniphysae	Cypriniformes				Cyprinoidea	Cyprinidae				Danio				Danio rerio
DEQLHSGLSELLTEVSNPK	Eukaryota	Metazoa			Chordata	Craniata	Actinopterygii	Actinopteri	Neopterygii	Teleostei	Cypriniphysae	Cypriniformes				Cyprinoidea	Cyprinidae				Danio				Danio rerio
DETEIAADCNHLLWNYK	Eukaryota	Metazoa			Chordata	Craniata	Actinopterygii	Actinopteri	Neopterygii	Teleostei	Cypriniphysae	Cypriniformes				Cyprinoidea	Cyprinidae				Danio				Danio rerio
DGELLFVHSAEK	Eukaryota	Metazoa			Chordata	Craniata	Actinopterygii	Actinopteri	Neopterygii	Teleostei	Cypriniphysae	Cypriniformes				Cyprinoidea	Cyprinidae				Danio				Danio rerio
DGNQTIGTGLVTDILTITK	Eukaryota	Metazoa			Chordata	Craniata	Actinopterygii	Actinopteri	Neopterygii	Teleostei	Cypriniphysae	Cypriniformes				Cyprinoidea	Cyprinidae				Danio				Danio rerio
DGYGDIIPPDSILHFDVLMLDIWNK	Eukaryota	Metazoa			Chordata	Craniata	Actinopterygii	Actinopteri	Neopterygii	Teleostei	Cypriniphysae	Cypriniformes				Cyprinoidea	Cyprinidae				Danio				Danio rerio
DHIFDALTNSYNQAR	Eukaryota	Metazoa			Chordata	Craniata	Actinopterygii	Actinopteri	Neopterygii	Teleostei	Cypriniphysae	Cypriniformes				Cyprinoidea	Cyprinidae				Danio				Danio rerio
DLDGFLVGGASLKPEFIDIINAK	Eukaryota	Metazoa			Chordata	Craniata	Actinopterygii	Actinopteri	Neopterygii	Teleostei	Cypriniphysae	Cypriniformes				Cyprinoidea	Cyprinidae				Danio				Danio rerio
DLEIERPVAGSHINAR	Eukaryota	Metazoa			Chordata	Craniata	Actinopterygii	Actinopteri	Neopterygii	Teleostei	Cypriniphysae	Cypriniformes				Cyprinoidea	Cyprinidae				Danio				Danio rerio
DLLELTVSALSGASISPLGPLR	Eukaryota	Metazoa			Chordata	Craniata	Actinopterygii	Actinopteri	Neopterygii	Teleostei	Cypriniphysae	Cypriniformes				Cyprinoidea	Cyprinidae				Danio				Danio rerio
DLLVHPVTEEGSR	Eukaryota	Metazoa			Chordata	Craniata	Actinopterygii	Actinopteri	Neopterygii	Teleostei	Cypriniphysae	Cypriniformes				Cyprinoidea	Cyprinidae				Danio				Danio rerio
DINEDEWTVCTPPTGVQATHFTVK	Eukaryota	Metazoa			Chordata	Craniata	Actinopterygii	Actinopteri	Neopterygii	Teleostei	Cypriniphysae	Cypriniformes				Cyprinoidea	Cyprinidae				Danio				Danio rerio
DIQPDIQHLLLFHNAASLGDVSR	Eukaryota	Metazoa			Chordata	Craniata	Actinopterygii	Actinopteri	Neopterygii	Teleostei	Cypriniphysae	Cypriniformes				Cyprinoidea	Cyprinidae				Danio				Danio rerio
DLTEFFSQFGMIEK	Eukaryota	Metazoa			Chordata	Craniata	Actinopterygii	Actinopteri	Neopterygii	Teleostei	Cypriniphysae	Cypriniformes				Cyprinoidea	Cyprinidae				Danio				Danio rerio
DIYLPVTVPINPDGTFSINEDFLSWIHK	Eukaryota	Metazoa			Chordata	Craniata	Actinopterygii	Actinopteri	Neopterygii	Teleostei	Cypriniphysae	Cypriniformes				Cyprinoidea	Cyprinidae				Danio				Danio rerio
DMVHDDAPLK	Eukaryota	Metazoa			Chordata	Craniata	Actinopterygii	Actinopteri	Neopterygii	Teleostei	Cypriniphysae	Cypriniformes				Cyprinoidea	Cyprinidae				Danio				Danio rerio
DPNTYLFDHLLALKPVR	Eukaryota	Metazoa			Chordata	Craniata	Actinopterygii	Actinopteri	Neopterygii	Teleostei	Cypriniphysae	Cypriniformes				Cyprinoidea	Cyprinidae				Danio				Danio rerio
DPYYQWDHPDLR	Eukaryota	Metazoa			Chordata	Craniata	Actinopterygii	Actinopteri	Neopterygii	Teleostei	Cypriniphysae	Cypriniformes				Cyprinoidea	Cyprinidae				Danio				Danio rerio
DSHITLQQAEYEFLSFIR	Eukaryota	Metazoa			Chordata	Craniata	Actinopterygii	Actinopteri	Neopterygii	Teleostei	Cypriniphysae	Cypriniformes				Cyprinoidea	Cyprinidae				Danio				Danio rerio
DSLQSELVGQLYKPALLDDLLTESEDMAQR	Eukaryota	Metazoa			Chordata	Craniata	Actinopterygii	Actinopteri	Neopterygii	Teleostei	Cypriniphysae	Cypriniformes				Cyprinoidea	Cyprinidae				Danio				Danio rerio
DSVIGWIEEMLER	Eukaryota	Metazoa			Chordata	Craniata	Actinopterygii	Actinopteri	Neopterygii	Teleostei	Cypriniphysae	Cypriniformes				Cyprinoidea	Cyprinidae				Danio				Danio rerio
DVYNDSALVIWNRPR	Eukaryota	Metazoa			Chordata	Craniata	Actinopterygii	Actinopteri	Neopterygii	Teleostei	Cypriniphysae	Cypriniformes				Cyprinoidea	Cyprinidae				Danio				Danio rerio
DWGSHCQTPQIQSIR	Eukaryota	Metazoa			Chordata	Craniata	Actinopterygii	Actinopteri	Neopterygii	Teleostei	Cypriniphysae	Cypriniformes				Cyprinoidea	Cyprinidae				Danio				Danio rerio
DYFGAHTYELLSNPGTFIHTNWTGHGGK	Eukaryota	Metazoa			Chordata	Craniata	Actinopterygii	Actinopteri	Neopterygii	Teleostei	Cypriniphysae	Cypriniformes				Cyprinoidea	Cyprinidae				Danio				Danio rerio
EACASFEPGSIQYRPVGIALDTK	Eukaryota	Metazoa			Chordata	Craniata	Actinopterygii	Actinopteri	Neopterygii	Teleostei	Cypriniphysae	Cypriniformes				Cyprinoidea	Cyprinidae				Danio				Danio rerio
EATTAEQLRPLFQQADAK	Eukaryota	Metazoa			Chordata	Craniata	Actinopterygii	Actinopteri	Neopterygii	Teleostei	Cypriniphysae	Cypriniformes				Cyprinoidea	Cyprinidae				Danio				Danio rerio
EAVDDLLLTLNEAASEVGMVSGMVDSIADSMGK	Eukaryota	Metazoa			Chordata	Craniata	Actinopterygii	Actinopteri	Neopterygii	Teleostei	Cypriniphysae	Cypriniformes				Cyprinoidea	Cyprinidae				Danio				Danio rerio
EDFHSVFSDHAQIK	Eukaryota	Metazoa			Chordata	Craniata	Actinopterygii	Actinopteri	Neopterygii	Teleostei	Cypriniphysae	Cypriniformes				Cyprinoidea	Cyprinidae				Danio				Danio rerio
EEATEEVLQILDLYAR	Eukaryota	Metazoa			Chordata	Craniata	Actinopterygii	Actinopteri	Neopterygii	Teleostei	Cypriniphysae	Cypriniformes				Cyprinoidea	Cyprinidae				Danio				Danio rerio
EEDAAQLK	Eukaryota	Metazoa			Chordata	Craniata	Actinopterygii	Actinopteri	Neopterygii	Teleostei	Cypriniphysae	Cypriniformes				Cyprinoidea	Cyprinidae				Danio				Danio rerio
EELEEIIEEVDEDGSGSIDFEEFLVMMVR	Eukaryota	Metazoa			Chordata	Craniata	Actinopterygii	Actinopteri	Neopterygii	Teleostei	Cypriniphysae	Cypriniformes				Cyprinoidea	Cyprinidae				Danio				Danio rerio
EEQLTSMEAELTQLR	Eukaryota	Metazoa			Chordata	Craniata	Actinopterygii	Actinopteri	Neopterygii	Teleostei	Cypriniphysae	Cypriniformes				Cyprinoidea	Cyprinidae				Danio				Danio rerio
EHHTDQYSGDQLIIR	Eukaryota	Metazoa			Chordata	Craniata	Actinopterygii	Actinopteri	Neopterygii	Teleostei	Cypriniphysae	Cypriniformes				Cyprinoidea	Cyprinidae				Danio				Danio rerio
EHPDVQGQPIEDLYESVNDR	Eukaryota	Metazoa			Chordata	Craniata	Actinopterygii	Actinopteri	Neopterygii	Teleostei	Cypriniphysae	Cypriniformes				Cyprinoidea	Cyprinidae				Danio				Danio rerio
ELEEIHGIHCNMTLLFSFAQAVACAEAR	Eukaryota	Metazoa			Chordata	Craniata	Actinopterygii	Actinopteri	Neopterygii	Teleostei	Cypriniphysae	Cypriniformes				Cyprinoidea	Cyprinidae				Danio				Danio rerio
EILKPEIAIGLLEAQAATGFIVDPVR	Eukaryota	Metazoa			Chordata	Craniata	Actinopterygii	Actinopteri	Neopterygii	Teleostei	Cypriniphysae	Cypriniformes				Cyprinoidea	Cyprinidae				Danio				Danio rerio
ENHLTPGTALCLLEAQAATGFIIDPIQAK	Eukaryota	Metazoa			Chordata	Craniata	Actinopterygii	Actinopteri	Neopterygii	Teleostei	Cypriniphysae	Cypriniformes				Cyprinoidea	Cyprinidae				Danio				Danio rerio
EPDPFSLTIGK	Eukaryota	Metazoa			Chordata	Craniata	Actinopterygii	Actinopteri	Neopterygii	Teleostei	Cypriniphysae	Cypriniformes				Cyprinoidea	Cyprinidae				Danio				Danio rerio
EQLLQAVPLLVSHLQAESIVQHTYAAHALER	Eukaryota	Metazoa			Chordata	Craniata	Actinopterygii	Actinopteri	Neopterygii	Teleostei	Cypriniphysae	Cypriniformes				Cyprinoidea	Cyprinidae				Danio				Danio rerio
ESHMSENCPPLDLPGSVQELQDLCK	Eukaryota	Metazoa			Chordata	Craniata	Actinopterygii	Actinopteri	Neopterygii	Teleostei	Cypriniphysae	Cypriniformes				Cyprinoidea	Cyprinidae				Danio				Danio rerio
ETSGSLQEILLAVVK	Eukaryota	Metazoa			Chordata	Craniata	Actinopterygii	Actinopteri	Neopterygii	Teleostei	Cypriniphysae	Cypriniformes				Cyprinoidea	Cyprinidae				Danio				Danio rerio
EVFNQDDFLLLESIILK	Eukaryota	Metazoa			Chordata	Craniata	Actinopterygii	Actinopteri	Neopterygii	Teleostei	Cypriniphysae	Cypriniformes				Cyprinoidea	Cyprinidae				Danio				Danio rerio
EVHEVLLPGLQTLHDALAAK	Eukaryota	Metazoa			Chordata	Craniata	Actinopterygii	Actinopteri	Neopterygii	Teleostei	Cypriniphysae	Cypriniformes				Cyprinoidea	Cyprinidae				Danio				Danio rerio
EVLEALGETLVNKPK	Eukaryota	Metazoa			Chordata	Craniata	Actinopterygii	Actinopteri	Neopterygii	Teleostei	Cypriniphysae	Cypriniformes				Cyprinoidea	Cyprinidae				Danio				Danio rerio
EVLNTINALLGQLGNIDK	Eukaryota	Metazoa			Chordata	Craniata	Actinopterygii	Actinopteri	Neopterygii	Teleostei	Cypriniphysae	Cypriniformes				Cyprinoidea	Cyprinidae				Danio				Danio rerio
EWNNYSIVTDTPVYVTAILGHTWASELNYR	Eukaryota	Metazoa			Chordata	Craniata	Actinopterygii	Actinopteri	Neopterygii	Teleostei	Cypriniphysae	Cypriniformes				Cyprinoidea	Cyprinidae				Danio				Danio rerio
EWTVAVPGPPHGLR	Eukaryota	Metazoa			Chordata	Craniata	Actinopterygii	Actinopteri	Neopterygii	Teleostei	Cypriniphysae	Cypriniformes				Cyprinoidea	Cyprinidae				Danio				Danio rerio
EYGCHAQTPQIQSIR	Eukaryota	Metazoa			Chordata	Craniata	Actinopterygii	Actinopteri	Neopterygii	Teleostei	Cypriniphysae	Cypriniformes				Cyprinoidea	Cyprinidae				Danio				Danio rerio
EYPSPEDPHEGIVHLVEESFR	Eukaryota	Metazoa			Chordata	Craniata	Actinopterygii	Actinopteri	Neopterygii	Teleostei	Cypriniphysae	Cypriniformes				Cyprinoidea	Cyprinidae				Danio				Danio rerio
FAAVGFAESVALELLSAGK	Eukaryota	Metazoa			Chordata	Craniata	Actinopterygii	Actinopteri	Neopterygii	Teleostei	Cypriniphysae	Cypriniformes				Cyprinoidea	Cyprinidae				Danio				Danio rerio
FAHSVEDLLQEGEEADDDDIYNVLSTLK	Eukaryota	Metazoa			Chordata	Craniata	Actinopterygii	Actinopteri	Neopterygii	Teleostei	Cypriniphysae	Cypriniformes				Cyprinoidea	Cyprinidae				Danio				Danio rerio
FALFDLAEDK	Eukaryota	Metazoa			Chordata	Craniata	Actinopterygii	Actinopteri	Neopterygii	Teleostei	Cypriniphysae	Cypriniformes				Cyprinoidea	Cyprinidae				Danio				Danio rerio
FAVMGVNTAFIQAAVMAR	Eukaryota	Metazoa			Chordata	Craniata	Actinopterygii	Actinopteri	Neopterygii	Teleostei	Cypriniphysae	Cypriniformes				Cyprinoidea	Cyprinidae				Danio				Danio rerio
FDNLFFIEVPK	Eukaryota	Metazoa			Chordata	Craniata	Actinopterygii	Actinopteri	Neopterygii	Teleostei	Cypriniphysae	Cypriniformes				Cyprinoidea	Cyprinidae				Danio				Danio rerio
FEAIWAQFK	Eukaryota	Metazoa			Chordata	Craniata	Actinopterygii	Actinopteri	Neopterygii	Teleostei	Cypriniphysae	Cypriniformes				Cyprinoidea	Cyprinidae				Danio				Danio rerio
FFPDSDATTYAQHVFR	Eukaryota	Metazoa			Chordata	Craniata	Actinopterygii	Actinopteri	Neopterygii	Teleostei	Cypriniphysae	Cypriniformes				Cyprinoidea	Cyprinidae				Danio				Danio rerio
FGAVFLWDTGSSVGEIVGHSK	Eukaryota	Metazoa			Chordata	Craniata	Actinopterygii	Actinopteri	Neopterygii	Teleostei	Cypriniphysae	Cypriniformes				Cyprinoidea	Cyprinidae				Danio				Danio rerio
FLEVQYLTGGLIEPDVTGR	Eukaryota	Metazoa			Chordata	Craniata	Actinopterygii	Actinopteri	Neopterygii	Teleostei	Cypriniphysae	Cypriniformes				Cyprinoidea	Cyprinidae				Danio				Danio rerio
FLGVIGDLR	Eukaryota	Metazoa			Chordata	Craniata	Actinopterygii	Actinopteri	Neopterygii	Teleostei	Cypriniphysae	Cypriniformes				Cyprinoidea	Cyprinidae				Danio				Danio rerio
FIQDSAAHSFLAEHK	Eukaryota	Metazoa			Chordata	Craniata	Actinopterygii	Actinopteri	Neopterygii	Teleostei	Cypriniphysae	Cypriniformes				Cyprinoidea	Cyprinidae				Danio				Danio rerio
FSHDVSELGLDGSSGELPLVGIR	Eukaryota	Metazoa			Chordata	Craniata	Actinopterygii	Actinopteri	Neopterygii	Teleostei	Cypriniphysae	Cypriniformes				Cyprinoidea	Cyprinidae				Danio				Danio rerio
FSSALWENEGVLEEFLK	Eukaryota	Metazoa			Chordata	Craniata	Actinopterygii	Actinopteri	Neopterygii	Teleostei	Cypriniphysae	Cypriniformes				Cyprinoidea	Cyprinidae				Danio				Danio rerio
GAAIEIPAEIVGLPLPTFEWTK	Eukaryota	Metazoa			Chordata	Craniata	Actinopterygii	Actinopteri	Neopterygii	Teleostei	Cypriniphysae	Cypriniformes				Cyprinoidea	Cyprinidae				Danio				Danio rerio
GAHVFFTDAIPDSLFNLLSK	Eukaryota	Metazoa			Chordata	Craniata	Actinopterygii	Actinopteri	Neopterygii	Teleostei	Cypriniphysae	Cypriniformes				Cyprinoidea	Cyprinidae				Danio				Danio rerio
GDLLPSALIWITSR	Eukaryota	Metazoa			Chordata	Craniata	Actinopterygii	Actinopteri	Neopterygii	Teleostei	Cypriniphysae	Cypriniformes				Cyprinoidea	Cyprinidae				Danio				Danio rerio
GEAVWFGCDVGK	Eukaryota	Metazoa			Chordata	Craniata	Actinopterygii	Actinopteri	Neopterygii	Teleostei	Cypriniphysae	Cypriniformes				Cyprinoidea	Cyprinidae				Danio				Danio rerio
GEIGVLVCCGNMLVTGSNTK	Eukaryota	Metazoa			Chordata	Craniata	Actinopterygii	Actinopteri	Neopterygii	Teleostei	Cypriniphysae	Cypriniformes				Cyprinoidea	Cyprinidae				Danio				Danio rerio
GEYYFFIDEHTK	Eukaryota	Metazoa			Chordata	Craniata	Actinopterygii	Actinopteri	Neopterygii	Teleostei	Cypriniphysae	Cypriniformes				Cyprinoidea	Cyprinidae				Danio				Danio rerio
GGHFAAFEEPQLLAQDIIQFAEK	Eukaryota	Metazoa			Chordata	Craniata	Actinopterygii	Actinopteri	Neopterygii	Teleostei	Cypriniphysae	Cypriniformes				Cyprinoidea	Cyprinidae				Danio				Danio rerio
GGLLTLSELHAFMLR	Eukaryota	Metazoa			Chordata	Craniata	Actinopterygii	Actinopteri	Neopterygii	Teleostei	Cypriniphysae	Cypriniformes				Cyprinoidea	Cyprinidae				Danio				Danio rerio
GHFAELESLLELLNTSQFSSR	Eukaryota	Metazoa			Chordata	Craniata	Actinopterygii	Actinopteri	Neopterygii	Teleostei	Cypriniphysae	Cypriniformes				Cyprinoidea	Cyprinidae				Danio				Danio rerio
GHYIGSYEDIFTVHCHR	Eukaryota	Metazoa			Chordata	Craniata	Actinopterygii	Actinopteri	Neopterygii	Teleostei	Cypriniphysae	Cypriniformes				Cyprinoidea	Cyprinidae				Danio				Danio rerio
GLEAVNIWLDK	Eukaryota	Metazoa			Chordata	Craniata	Actinopterygii	Actinopteri	Neopterygii	Teleostei	Cypriniphysae	Cypriniformes				Cyprinoidea	Cyprinidae				Danio				Danio rerio
GLFEEVPEPLSEVEK	Eukaryota	Metazoa			Chordata	Craniata	Actinopterygii	Actinopteri	Neopterygii	Teleostei	Cypriniphysae	Cypriniformes				Cyprinoidea	Cyprinidae				Danio				Danio rerio
GLGTNEAVLSEILGTR	Eukaryota	Metazoa			Chordata	Craniata	Actinopterygii	Actinopteri	Neopterygii	Teleostei	Cypriniphysae	Cypriniformes				Cyprinoidea	Cyprinidae				Danio				Danio rerio
GLLSSGLDFLR	Eukaryota	Metazoa			Chordata	Craniata	Actinopterygii	Actinopteri	Neopterygii	Teleostei	Cypriniphysae	Cypriniformes				Cyprinoidea	Cyprinidae				Danio				Danio rerio
GLLTQFPEFFSFGLFSK	Eukaryota	Metazoa			Chordata	Craniata	Actinopterygii	Actinopteri	Neopterygii	Teleostei	Cypriniphysae	Cypriniformes				Cyprinoidea	Cyprinidae				Danio				Danio rerio
GLSPVAAYLHIPDIIK	Eukaryota	Metazoa			Chordata	Craniata	Actinopterygii	Actinopteri	Neopterygii	Teleostei	Cypriniphysae	Cypriniformes				Cyprinoidea	Cyprinidae				Danio				Danio rerio
GLWEEVAPTLPDNHFDGILYDTYPLSEETWHTHQFNFIK	Eukaryota	Metazoa			Chordata	Craniata	Actinopterygii	Actinopteri	Neopterygii	Teleostei	Cypriniphysae	Cypriniformes				Cyprinoidea	Cyprinidae				Danio				Danio rerio
GNYCGHNEWQAQNPHIQSIR	Eukaryota	Metazoa			Chordata	Craniata	Actinopterygii	Actinopteri	Neopterygii	Teleostei	Cypriniphysae	Cypriniformes				Cyprinoidea	Cyprinidae				Danio				Danio rerio
GSDHAASLEPEELAELVR	Eukaryota	Metazoa			Chordata	Craniata	Actinopterygii	Actinopteri	Neopterygii	Teleostei	Cypriniphysae	Cypriniformes				Cyprinoidea	Cyprinidae				Danio				Danio rerio
GVDACHLLAPHNADFAFSLYK	Eukaryota	Metazoa			Chordata	Craniata	Actinopterygii	Actinopteri	Neopterygii	Teleostei	Cypriniphysae	Cypriniformes				Cyprinoidea	Cyprinidae				Danio				Danio rerio
HAVVGSTGHQLPLFTSVDAQGILGADGR	Eukaryota	Metazoa			Chordata	Craniata	Actinopterygii	Actinopteri	Neopterygii	Teleostei	Cypriniphysae	Cypriniformes				Cyprinoidea	Cyprinidae				Danio				Danio rerio
HCTAVPTCPAELLRPIHEIATEAISK	Eukaryota	Metazoa			Chordata	Craniata	Actinopterygii	Actinopteri	Neopterygii	Teleostei	Cypriniphysae	Cypriniformes				Cyprinoidea	Cyprinidae				Danio				Danio rerio
HCVAVPSCPAELLKPIHEITAEAISK	Eukaryota	Metazoa			Chordata	Craniata	Actinopterygii	Actinopteri	Neopterygii	Teleostei	Cypriniphysae	Cypriniformes				Cyprinoidea	Cyprinidae				Danio				Danio rerio
HCVAVPTCPAELLRPIHETATEAISK	Eukaryota	Metazoa			Chordata	Craniata	Actinopterygii	Actinopteri	Neopterygii	Teleostei	Cypriniphysae	Cypriniformes				Cyprinoidea	Cyprinidae				Danio				Danio rerio
HELLHNVNDIVAVGTESFYATNDHYFTNDILK	Eukaryota	Metazoa			Chordata	Craniata	Actinopterygii	Actinopteri	Neopterygii	Teleostei	Cypriniphysae	Cypriniformes				Cyprinoidea	Cyprinidae				Danio				Danio rerio
HELLHSVNDIVAVGTESFYATNDHYFTNDILK	Eukaryota	Metazoa			Chordata	Craniata	Actinopterygii	Actinopteri	Neopterygii	Teleostei	Cypriniphysae	Cypriniformes				Cyprinoidea	Cyprinidae				Danio				Danio rerio
HFSAIINPPQACILAVGGSEK	Eukaryota	Metazoa			Chordata	Craniata	Actinopterygii	Actinopteri	Neopterygii	Teleostei	Cypriniphysae	Cypriniformes				Cyprinoidea	Cyprinidae				Danio				Danio rerio
HGAIPPLLALLAVPDLSVFPAGYLR	Eukaryota	Metazoa			Chordata	Craniata	Actinopterygii	Actinopteri	Neopterygii	Teleostei	Cypriniphysae	Cypriniformes				Cyprinoidea	Cyprinidae				Danio				Danio rerio
HGIDGEGIILFR	Eukaryota	Metazoa			Chordata	Craniata	Actinopterygii	Actinopteri	Neopterygii	Teleostei	Cypriniphysae	Cypriniformes				Cyprinoidea	Cyprinidae				Danio				Danio rerio
HGTTVINGVLTAVGLMDDLK	Eukaryota	Metazoa			Chordata	Craniata	Actinopterygii	Actinopteri	Neopterygii	Teleostei	Cypriniphysae	Cypriniformes				Cyprinoidea	Cyprinidae				Danio				Danio rerio
HHTSSLEIFSPAVADSGEYTCK	Eukaryota	Metazoa			Chordata	Craniata	Actinopterygii	Actinopteri	Neopterygii	Teleostei	Cypriniphysae	Cypriniformes				Cyprinoidea	Cyprinidae				Danio				Danio rerio
HLEWETALTNTTGCLR	Eukaryota	Metazoa			Chordata	Craniata	Actinopterygii	Actinopteri	Neopterygii	Teleostei	Cypriniphysae	Cypriniformes				Cyprinoidea	Cyprinidae				Danio				Danio rerio
HLTSSPLTLSTSR	Eukaryota	Metazoa			Chordata	Craniata	Actinopterygii	Actinopteri	Neopterygii	Teleostei	Cypriniphysae	Cypriniformes				Cyprinoidea	Cyprinidae				Danio				Danio rerio
HLTTLVDDIWYYAGDR	Eukaryota	Metazoa			Chordata	Craniata	Actinopterygii	Actinopteri	Neopterygii	Teleostei	Cypriniphysae	Cypriniformes				Cyprinoidea	Cyprinidae				Danio				Danio rerio
HMDLNDLEEK	Eukaryota	Metazoa			Chordata	Craniata	Actinopterygii	Actinopteri	Neopterygii	Teleostei	Cypriniphysae	Cypriniformes				Cyprinoidea	Cyprinidae				Danio				Danio rerio
HPELDVAIDGADEVDTALTLIK	Eukaryota	Metazoa			Chordata	Craniata	Actinopterygii	Actinopteri	Neopterygii	Teleostei	Cypriniphysae	Cypriniformes				Cyprinoidea	Cyprinidae				Danio				Danio rerio
HPFDPPSEPLNCCVNK	Eukaryota	Metazoa			Chordata	Craniata	Actinopterygii	Actinopteri	Neopterygii	Teleostei	Cypriniphysae	Cypriniformes				Cyprinoidea	Cyprinidae				Danio				Danio rerio
HPFNAPGAPAPPVVVSIR	Eukaryota	Metazoa			Chordata	Craniata	Actinopterygii	Actinopteri	Neopterygii	Teleostei	Cypriniphysae	Cypriniformes				Cyprinoidea	Cyprinidae				Danio				Danio rerio
HSQAFDELNEQLEQVK	Eukaryota	Metazoa			Chordata	Craniata	Actinopterygii	Actinopteri	Neopterygii	Teleostei	Cypriniphysae	Cypriniformes				Cyprinoidea	Cyprinidae				Danio				Danio rerio
HTIVGLNPGTEYQIGVQAIK	Eukaryota	Metazoa			Chordata	Craniata	Actinopterygii	Actinopteri	Neopterygii	Teleostei	Cypriniphysae	Cypriniformes				Cyprinoidea	Cyprinidae				Danio				Danio rerio
HTPELSQMIVNVGGVAAVIDYLGDSK	Eukaryota	Metazoa			Chordata	Craniata	Actinopterygii	Actinopteri	Neopterygii	Teleostei	Cypriniphysae	Cypriniformes				Cyprinoidea	Cyprinidae				Danio				Danio rerio
HTVLLLPGALGSGETDFGPQLSALDSSR	Eukaryota	Metazoa			Chordata	Craniata	Actinopterygii	Actinopteri	Neopterygii	Teleostei	Cypriniphysae	Cypriniformes				Cyprinoidea	Cyprinidae				Danio				Danio rerio
HVSVEALDFIDR	Eukaryota	Metazoa			Chordata	Craniata	Actinopterygii	Actinopteri	Neopterygii	Teleostei	Cypriniphysae	Cypriniformes				Cyprinoidea	Cyprinidae				Danio				Danio rerio
HVTLEFITVGQDNGPLELSTLECLANAADGVR	Eukaryota	Metazoa			Chordata	Craniata	Actinopterygii	Actinopteri	Neopterygii	Teleostei	Cypriniphysae	Cypriniformes				Cyprinoidea	Cyprinidae				Danio				Danio rerio
KPLNPSENVIIENTESYTHLVIR	Eukaryota	Metazoa			Chordata	Craniata	Actinopterygii	Actinopteri	Neopterygii	Teleostei	Cypriniphysae	Cypriniformes				Cyprinoidea	Cyprinidae				Danio				Danio rerio
KPPPVLPEFQTR	Eukaryota	Metazoa			Chordata	Craniata	Actinopterygii	Actinopteri	Neopterygii	Teleostei	Cypriniphysae	Cypriniformes				Cyprinoidea	Cyprinidae				Danio				Danio rerio
LAEQFDEASVHLWELLEGR	Eukaryota	Metazoa			Chordata	Craniata	Actinopterygii	Actinopteri	Neopterygii	Teleostei	Cypriniphysae	Cypriniformes				Cyprinoidea	Cyprinidae				Danio				Danio rerio
IAGGLASELEPVVDK	Eukaryota	Metazoa			Chordata	Craniata	Actinopterygii	Actinopteri	Neopterygii	Teleostei	Cypriniphysae	Cypriniformes				Cyprinoidea	Cyprinidae				Danio				Danio rerio
LAQDYLHIVDSLEIPTPDPQYLQDLVK	Eukaryota	Metazoa			Chordata	Craniata	Actinopterygii	Actinopteri	Neopterygii	Teleostei	Cypriniphysae	Cypriniformes				Cyprinoidea	Cyprinidae				Danio				Danio rerio
LAWVSHDSTVTVVDPTISSTPSQLK	Eukaryota	Metazoa			Chordata	Craniata	Actinopterygii	Actinopteri	Neopterygii	Teleostei	Cypriniphysae	Cypriniformes				Cyprinoidea	Cyprinidae				Danio				Danio rerio
ICILHENFTTVRPEDPFEDFITKPPVR	Eukaryota	Metazoa			Chordata	Craniata	Actinopterygii	Actinopteri	Neopterygii	Teleostei	Cypriniphysae	Cypriniformes				Cyprinoidea	Cyprinidae				Danio				Danio rerio
LDGSEDQVLITEHGDLGHGR	Eukaryota	Metazoa			Chordata	Craniata	Actinopterygii	Actinopteri	Neopterygii	Teleostei	Cypriniphysae	Cypriniformes				Cyprinoidea	Cyprinidae				Danio				Danio rerio
LDGSEESVLITEHGDLGQGR	Eukaryota	Metazoa			Chordata	Craniata	Actinopterygii	Actinopteri	Neopterygii	Teleostei	Cypriniphysae	Cypriniformes				Cyprinoidea	Cyprinidae				Danio				Danio rerio
IDLRPILTEGIPVLGSFLR	Eukaryota	Metazoa			Chordata	Craniata	Actinopterygii	Actinopteri	Neopterygii	Teleostei	Cypriniphysae	Cypriniformes				Cyprinoidea	Cyprinidae				Danio				Danio rerio
IEGLHEEIAFLR	Eukaryota	Metazoa			Chordata	Craniata	Actinopterygii	Actinopteri	Neopterygii	Teleostei	Cypriniphysae	Cypriniformes				Cyprinoidea	Cyprinidae				Danio				Danio rerio
LEQALQSLLESLTCPPYTPTQHLER	Eukaryota	Metazoa			Chordata	Craniata	Actinopterygii	Actinopteri	Neopterygii	Teleostei	Cypriniphysae	Cypriniformes				Cyprinoidea	Cyprinidae				Danio				Danio rerio
IFLDLLIPDQHVQFINR	Eukaryota	Metazoa			Chordata	Craniata	Actinopterygii	Actinopteri	Neopterygii	Teleostei	Cypriniphysae	Cypriniformes				Cyprinoidea	Cyprinidae				Danio				Danio rerio
LFLHNNVVYHEQHVER	Eukaryota	Metazoa			Chordata	Craniata	Actinopterygii	Actinopteri	Neopterygii	Teleostei	Cypriniphysae	Cypriniformes				Cyprinoidea	Cyprinidae				Danio				Danio rerio
LFNHVNDDTGFK	Eukaryota	Metazoa			Chordata	Craniata	Actinopterygii	Actinopteri	Neopterygii	Teleostei	Cypriniphysae	Cypriniformes				Cyprinoidea	Cyprinidae				Danio				Danio rerio
LFPNMEEYR	Eukaryota	Metazoa			Chordata	Craniata	Actinopterygii	Actinopteri	Neopterygii	Teleostei	Cypriniphysae	Cypriniformes				Cyprinoidea	Cyprinidae				Danio				Danio rerio
LFSDANLCAIHAK	Eukaryota	Metazoa			Chordata	Craniata	Actinopterygii	Actinopteri	Neopterygii	Teleostei	Cypriniphysae	Cypriniformes				Cyprinoidea	Cyprinidae				Danio				Danio rerio
LGGTVLDTVTDWIR	Eukaryota	Metazoa			Chordata	Craniata	Actinopterygii	Actinopteri	Neopterygii	Teleostei	Cypriniphysae	Cypriniformes				Cyprinoidea	Cyprinidae				Danio				Danio rerio
IGVDEFALLVK	Eukaryota	Metazoa			Chordata	Craniata	Actinopterygii	Actinopteri	Neopterygii	Teleostei	Cypriniphysae	Cypriniformes				Cyprinoidea	Cyprinidae				Danio				Danio rerio
IGVELIAASTDSHFSHLAWINTPR	Eukaryota	Metazoa			Chordata	Craniata	Actinopterygii	Actinopteri	Neopterygii	Teleostei	Cypriniphysae	Cypriniformes				Cyprinoidea	Cyprinidae				Danio				Danio rerio
LHGLDQHQAMVK	Eukaryota	Metazoa			Chordata	Craniata	Actinopterygii	Actinopteri	Neopterygii	Teleostei	Cypriniphysae	Cypriniformes				Cyprinoidea	Cyprinidae				Danio				Danio rerio
IHGLIVQLPLDSIHTINTER	Eukaryota	Metazoa			Chordata	Craniata	Actinopterygii	Actinopteri	Neopterygii	Teleostei	Cypriniphysae	Cypriniformes				Cyprinoidea	Cyprinidae				Danio				Danio rerio
LHPKPEGLTLQYGTAGFR	Eukaryota	Metazoa			Chordata	Craniata	Actinopterygii	Actinopteri	Neopterygii	Teleostei	Cypriniphysae	Cypriniformes				Cyprinoidea	Cyprinidae				Danio				Danio rerio
IHPVVLASIVDSYER	Eukaryota	Metazoa			Chordata	Craniata	Actinopterygii	Actinopteri	Neopterygii	Teleostei	Cypriniphysae	Cypriniformes				Cyprinoidea	Cyprinidae				Danio				Danio rerio
IHWEILDSIPALSNAK	Eukaryota	Metazoa			Chordata	Craniata	Actinopterygii	Actinopteri	Neopterygii	Teleostei	Cypriniphysae	Cypriniformes				Cyprinoidea	Cyprinidae				Danio				Danio rerio
LKPDLVDFTFEGK	Eukaryota	Metazoa			Chordata	Craniata	Actinopterygii	Actinopteri	Neopterygii	Teleostei	Cypriniphysae	Cypriniformes				Cyprinoidea	Cyprinidae				Danio				Danio rerio
LLDCQYATGGIIDPVNSHHVPVQLACTQGQLDEDLSK	Eukaryota	Metazoa			Chordata	Craniata	Actinopterygii	Actinopteri	Neopterygii	Teleostei	Cypriniphysae	Cypriniformes				Cyprinoidea	Cyprinidae				Danio				Danio rerio
IIDEDNSGFIEEAELK	Eukaryota	Metazoa			Chordata	Craniata	Actinopterygii	Actinopteri	Neopterygii	Teleostei	Cypriniphysae	Cypriniformes				Cyprinoidea	Cyprinidae				Danio				Danio rerio
IIIGVAFPTAR	Eukaryota	Metazoa			Chordata	Craniata	Actinopterygii	Actinopteri	Neopterygii	Teleostei	Cypriniphysae	Cypriniformes				Cyprinoidea	Cyprinidae				Danio				Danio rerio
IINHNLLVSLAMMFPDDFTPEVHVSVDK	Eukaryota	Metazoa			Chordata	Craniata	Actinopterygii	Actinopteri	Neopterygii	Teleostei	Cypriniphysae	Cypriniformes				Cyprinoidea	Cyprinidae				Danio				Danio rerio
IITLPPFLGYGENGDGSDIPAQASLVFDVVLLDLHNPK	Eukaryota	Metazoa			Chordata	Craniata	Actinopterygii	Actinopteri	Neopterygii	Teleostei	Cypriniphysae	Cypriniformes				Cyprinoidea	Cyprinidae				Danio				Danio rerio
LLWTVVEPK	Eukaryota	Metazoa			Chordata	Craniata	Actinopterygii	Actinopteri	Neopterygii	Teleostei	Cypriniphysae	Cypriniformes				Cyprinoidea	Cyprinidae				Danio				Danio rerio
LMELHGEGGSTSAAAKPAEGDTGAK	Eukaryota	Metazoa			Chordata	Craniata	Actinopterygii	Actinopteri	Neopterygii	Teleostei	Cypriniphysae	Cypriniformes				Cyprinoidea	Cyprinidae				Danio				Danio rerio
LNATISDLIMGNTYIFR	Eukaryota	Metazoa			Chordata	Craniata	Actinopterygii	Actinopteri	Neopterygii	Teleostei	Cypriniphysae	Cypriniformes				Cyprinoidea	Cyprinidae				Danio				Danio rerio
INELEGALSHEK	Eukaryota	Metazoa			Chordata	Craniata	Actinopterygii	Actinopteri	Neopterygii	Teleostei	Cypriniphysae	Cypriniformes				Cyprinoidea	Cyprinidae				Danio				Danio rerio
INGLEVPISSLPYQHPSGSIQIR	Eukaryota	Metazoa			Chordata	Craniata	Actinopterygii	Actinopteri	Neopterygii	Teleostei	Cypriniphysae	Cypriniformes				Cyprinoidea	Cyprinidae				Danio				Danio rerio
LNSALAAQLQTPIK	Eukaryota	Metazoa			Chordata	Craniata	Actinopterygii	Actinopteri	Neopterygii	Teleostei	Cypriniphysae	Cypriniformes				Cyprinoidea	Cyprinidae				Danio				Danio rerio
LNVEGEIESLK	Eukaryota	Metazoa			Chordata	Craniata	Actinopterygii	Actinopteri	Neopterygii	Teleostei	Cypriniphysae	Cypriniformes				Cyprinoidea	Cyprinidae				Danio				Danio rerio
LQLVDAGLVECLLEVVAQTVNSER	Eukaryota	Metazoa			Chordata	Craniata	Actinopterygii	Actinopteri	Neopterygii	Teleostei	Cypriniphysae	Cypriniformes				Cyprinoidea	Cyprinidae				Danio				Danio rerio
ISELPPVSSEHVGGYR	Eukaryota	Metazoa			Chordata	Craniata	Actinopterygii	Actinopteri	Neopterygii	Teleostei	Cypriniphysae	Cypriniformes				Cyprinoidea	Cyprinidae				Danio				Danio rerio
LSGYQHQVTVLEEQIVQLR	Eukaryota	Metazoa			Chordata	Craniata	Actinopterygii	Actinopteri	Neopterygii	Teleostei	Cypriniphysae	Cypriniformes				Cyprinoidea	Cyprinidae				Danio				Danio rerio
ISHLEEDSSQMR	Eukaryota	Metazoa			Chordata	Craniata	Actinopterygii	Actinopteri	Neopterygii	Teleostei	Cypriniphysae	Cypriniformes				Cyprinoidea	Cyprinidae				Danio				Danio rerio
LTPNNWSVDQCIQTGVDNPGHPFIK	Eukaryota	Metazoa			Chordata	Craniata	Actinopterygii	Actinopteri	Neopterygii	Teleostei	Cypriniphysae	Cypriniformes				Cyprinoidea	Cyprinidae				Danio				Danio rerio
LVDHVYDDQVIDQLTVR	Eukaryota	Metazoa			Chordata	Craniata	Actinopterygii	Actinopteri	Neopterygii	Teleostei	Cypriniphysae	Cypriniformes				Cyprinoidea	Cyprinidae				Danio				Danio rerio
LVQPIALQLVLDR	Eukaryota	Metazoa			Chordata	Craniata	Actinopterygii	Actinopteri	Neopterygii	Teleostei	Cypriniphysae	Cypriniformes				Cyprinoidea	Cyprinidae				Danio				Danio rerio
LVTELDTYVVEIEK	Eukaryota	Metazoa			Chordata	Craniata	Actinopterygii	Actinopteri	Neopterygii	Teleostei	Cypriniphysae	Cypriniformes				Cyprinoidea	Cyprinidae				Danio				Danio rerio
LYNLDVFQYELHNPMALYGAVPVLISHSTER	Eukaryota	Metazoa			Chordata	Craniata	Actinopterygii	Actinopteri	Neopterygii	Teleostei	Cypriniphysae	Cypriniformes				Cyprinoidea	Cyprinidae				Danio				Danio rerio
LYTIENLMPGHEYIFR	Eukaryota	Metazoa			Chordata	Craniata	Actinopterygii	Actinopteri	Neopterygii	Teleostei	Cypriniphysae	Cypriniformes				Cyprinoidea	Cyprinidae				Danio				Danio rerio
IYTLNLLDFKPK	Eukaryota	Metazoa			Chordata	Craniata	Actinopterygii	Actinopteri	Neopterygii	Teleostei	Cypriniphysae	Cypriniformes				Cyprinoidea	Cyprinidae				Danio				Danio rerio
NAFACFDEEGTGFIHEDYLR	Eukaryota	Metazoa			Chordata	Craniata	Actinopterygii	Actinopteri	Neopterygii	Teleostei	Cypriniphysae	Cypriniformes				Cyprinoidea	Cyprinidae				Danio				Danio rerio
NALLIVTMVSLAGR	Eukaryota	Metazoa			Chordata	Craniata	Actinopterygii	Actinopteri	Neopterygii	Teleostei	Cypriniphysae	Cypriniformes				Cyprinoidea	Cyprinidae				Danio				Danio rerio
NALVSNVNIELYNALHYHMVNK	Eukaryota	Metazoa			Chordata	Craniata	Actinopterygii	Actinopteri	Neopterygii	Teleostei	Cypriniphysae	Cypriniformes				Cyprinoidea	Cyprinidae				Danio				Danio rerio
NAVAHTFSLDNNLSCLINLIEFHAK	Eukaryota	Metazoa			Chordata	Craniata	Actinopterygii	Actinopteri	Neopterygii	Teleostei	Cypriniphysae	Cypriniformes				Cyprinoidea	Cyprinidae				Danio				Danio rerio
NDLQLAVASESENLSDAEER	Eukaryota	Metazoa			Chordata	Craniata	Actinopterygii	Actinopteri	Neopterygii	Teleostei	Cypriniphysae	Cypriniformes				Cyprinoidea	Cyprinidae				Danio				Danio rerio
NIASVCLQIGYPTLASIPHTIINGYK	Eukaryota	Metazoa			Chordata	Craniata	Actinopterygii	Actinopteri	Neopterygii	Teleostei	Cypriniphysae	Cypriniformes				Cyprinoidea	Cyprinidae				Danio				Danio rerio
NLHDLEEATAMIR	Eukaryota	Metazoa			Chordata	Craniata	Actinopterygii	Actinopteri	Neopterygii	Teleostei	Cypriniphysae	Cypriniformes				Cyprinoidea	Cyprinidae				Danio				Danio rerio
NLHLDIEEISELVNGLHQTLNHQDLR	Eukaryota	Metazoa			Chordata	Craniata	Actinopterygii	Actinopteri	Neopterygii	Teleostei	Cypriniphysae	Cypriniformes				Cyprinoidea	Cyprinidae				Danio				Danio rerio
NNIQHAGVQYILDSVIDQLQK	Eukaryota	Metazoa			Chordata	Craniata	Actinopterygii	Actinopteri	Neopterygii	Teleostei	Cypriniphysae	Cypriniformes				Cyprinoidea	Cyprinidae				Danio				Danio rerio
NQLISLIHDYTISIDDLDAYAER	Eukaryota	Metazoa			Chordata	Craniata	Actinopterygii	Actinopteri	Neopterygii	Teleostei	Cypriniphysae	Cypriniformes				Cyprinoidea	Cyprinidae				Danio				Danio rerio
NSLVFDCHFPEDEVGHGDGEEESDIFTIR	Eukaryota	Metazoa			Chordata	Craniata	Actinopterygii	Actinopteri	Neopterygii	Teleostei	Cypriniphysae	Cypriniformes				Cyprinoidea	Cyprinidae				Danio				Danio rerio
NVTIWGNHSSTQYPDVHHAIVTR	Eukaryota	Metazoa			Chordata	Craniata	Actinopterygii	Actinopteri	Neopterygii	Teleostei	Cypriniphysae	Cypriniformes				Cyprinoidea	Cyprinidae				Danio				Danio rerio
QATVAVCNPYLDPYCLYAIRPK	Eukaryota	Metazoa			Chordata	Craniata	Actinopterygii	Actinopteri	Neopterygii	Teleostei	Cypriniphysae	Cypriniformes				Cyprinoidea	Cyprinidae				Danio				Danio rerio
QDLASLPTELIAQIGNR	Eukaryota	Metazoa			Chordata	Craniata	Actinopterygii	Actinopteri	Neopterygii	Teleostei	Cypriniphysae	Cypriniformes				Cyprinoidea	Cyprinidae				Danio				Danio rerio
QETALIEILLCTIR	Eukaryota	Metazoa			Chordata	Craniata	Actinopterygii	Actinopteri	Neopterygii	Teleostei	Cypriniphysae	Cypriniformes				Cyprinoidea	Cyprinidae				Danio				Danio rerio
QFVANFDQEK	Eukaryota	Metazoa			Chordata	Craniata	Actinopterygii	Actinopteri	Neopterygii	Teleostei	Cypriniphysae	Cypriniformes				Cyprinoidea	Cyprinidae				Danio				Danio rerio
QGPHFVEYLSFEVTPECDVHLK	Eukaryota	Metazoa			Chordata	Craniata	Actinopterygii	Actinopteri	Neopterygii	Teleostei	Cypriniphysae	Cypriniformes				Cyprinoidea	Cyprinidae				Danio				Danio rerio
QHFPATQLLDYALEVEK	Eukaryota	Metazoa			Chordata	Craniata	Actinopterygii	Actinopteri	Neopterygii	Teleostei	Cypriniphysae	Cypriniformes				Cyprinoidea	Cyprinidae				Danio				Danio rerio
QLAFLEEAEGGFDHFTR	Eukaryota	Metazoa			Chordata	Craniata	Actinopterygii	Actinopteri	Neopterygii	Teleostei	Cypriniphysae	Cypriniformes				Cyprinoidea	Cyprinidae				Danio				Danio rerio
QLESAVLHCLCLLELALQK	Eukaryota	Metazoa			Chordata	Craniata	Actinopterygii	Actinopteri	Neopterygii	Teleostei	Cypriniphysae	Cypriniformes				Cyprinoidea	Cyprinidae				Danio				Danio rerio
QILANPFQDYVNTHPVSHAHR	Eukaryota	Metazoa			Chordata	Craniata	Actinopterygii	Actinopteri	Neopterygii	Teleostei	Cypriniphysae	Cypriniformes				Cyprinoidea	Cyprinidae				Danio				Danio rerio
QSDFLAICCALTPETHGICNWNLFSK	Eukaryota	Metazoa			Chordata	Craniata	Actinopterygii	Actinopteri	Neopterygii	Teleostei	Cypriniphysae	Cypriniformes				Cyprinoidea	Cyprinidae				Danio				Danio rerio
QVGNVTKPTIVISHEGDK	Eukaryota	Metazoa			Chordata	Craniata	Actinopterygii	Actinopteri	Neopterygii	Teleostei	Cypriniphysae	Cypriniformes				Cyprinoidea	Cyprinidae				Danio				Danio rerio
QVVTFTQLLEDQSAK	Eukaryota	Metazoa			Chordata	Craniata	Actinopterygii	Actinopteri	Neopterygii	Teleostei	Cypriniphysae	Cypriniformes				Cyprinoidea	Cyprinidae				Danio				Danio rerio
QWIEGDLLHLEIHCQDK	Eukaryota	Metazoa			Chordata	Craniata	Actinopterygii	Actinopteri	Neopterygii	Teleostei	Cypriniphysae	Cypriniformes				Cyprinoidea	Cyprinidae				Danio				Danio rerio
SAHGWQTHPPTTPALTEDSHSPSR	Eukaryota	Metazoa			Chordata	Craniata	Actinopterygii	Actinopteri	Neopterygii	Teleostei	Cypriniphysae	Cypriniformes				Cyprinoidea	Cyprinidae				Danio				Danio rerio
SCAALLGLVLESAFK	Eukaryota	Metazoa			Chordata	Craniata	Actinopterygii	Actinopteri	Neopterygii	Teleostei	Cypriniphysae	Cypriniformes				Cyprinoidea	Cyprinidae				Danio				Danio rerio
SDASANLDEHTASHMCSLSLTR	Eukaryota	Metazoa			Chordata	Craniata	Actinopterygii	Actinopteri	Neopterygii	Teleostei	Cypriniphysae	Cypriniformes				Cyprinoidea	Cyprinidae				Danio				Danio rerio
SDELNCFKPDDDCAHR	Eukaryota	Metazoa			Chordata	Craniata	Actinopterygii	Actinopteri	Neopterygii	Teleostei	Cypriniphysae	Cypriniformes				Cyprinoidea	Cyprinidae				Danio				Danio rerio
SDSEIAHIALETLEGHQR	Eukaryota	Metazoa			Chordata	Craniata	Actinopterygii	Actinopteri	Neopterygii	Teleostei	Cypriniphysae	Cypriniformes				Cyprinoidea	Cyprinidae				Danio				Danio rerio
SENSAFNFDTALTHVQQSLTHLETLSHSFLLSLK	Eukaryota	Metazoa			Chordata	Craniata	Actinopterygii	Actinopteri	Neopterygii	Teleostei	Cypriniphysae	Cypriniformes				Cyprinoidea	Cyprinidae				Danio				Danio rerio
SEVSGQLETTLLALCQATRPEGYNIDDALAHTDAK	Eukaryota	Metazoa			Chordata	Craniata	Actinopterygii	Actinopteri	Neopterygii	Teleostei	Cypriniphysae	Cypriniformes				Cyprinoidea	Cyprinidae				Danio				Danio rerio
SFLTLVECLENK	Eukaryota	Metazoa			Chordata	Craniata	Actinopterygii	Actinopteri	Neopterygii	Teleostei	Cypriniphysae	Cypriniformes				Cyprinoidea	Cyprinidae				Danio				Danio rerio
SFLTVAEELFR	Eukaryota	Metazoa			Chordata	Craniata	Actinopterygii	Actinopteri	Neopterygii	Teleostei	Cypriniphysae	Cypriniformes				Cyprinoidea	Cyprinidae				Danio				Danio rerio
SHQNTIEILSPFLFHLSVGGIQHPR	Eukaryota	Metazoa			Chordata	Craniata	Actinopterygii	Actinopteri	Neopterygii	Teleostei	Cypriniphysae	Cypriniformes				Cyprinoidea	Cyprinidae				Danio				Danio rerio
SIFLLWEPPR	Eukaryota	Metazoa			Chordata	Craniata	Actinopterygii	Actinopteri	Neopterygii	Teleostei	Cypriniphysae	Cypriniformes				Cyprinoidea	Cyprinidae				Danio				Danio rerio
SIFVPNIGWASQLTTGEVWVQFNDGSQLMVQVGVSCITFTSPEGHITR	Eukaryota	Metazoa			Chordata	Craniata	Actinopterygii	Actinopteri	Neopterygii	Teleostei	Cypriniphysae	Cypriniformes				Cyprinoidea	Cyprinidae				Danio				Danio rerio
SLIETANYNYIIKPSDSGALIAEATVK	Eukaryota	Metazoa			Chordata	Craniata	Actinopterygii	Actinopteri	Neopterygii	Teleostei	Cypriniphysae	Cypriniformes				Cyprinoidea	Cyprinidae				Danio				Danio rerio
SLLHGEYVNLHNSPTSLAFLR	Eukaryota	Metazoa			Chordata	Craniata	Actinopterygii	Actinopteri	Neopterygii	Teleostei	Cypriniphysae	Cypriniformes				Cyprinoidea	Cyprinidae				Danio				Danio rerio
SIMGHISLDLVTFLDPNNLEQQVWAIDLDLGYSNQLAMTQLMLMMTR	Eukaryota	Metazoa			Chordata	Craniata	Actinopterygii	Actinopteri	Neopterygii	Teleostei	Cypriniphysae	Cypriniformes				Cyprinoidea	Cyprinidae				Danio				Danio rerio
SIQDDPLLVHYMHVAK	Eukaryota	Metazoa			Chordata	Craniata	Actinopterygii	Actinopteri	Neopterygii	Teleostei	Cypriniphysae	Cypriniformes				Cyprinoidea	Cyprinidae				Danio				Danio rerio
SIQHLSSMLAGHSSDSETSEPNQQELLSSVQQNPCSPVQQSEAVSQLR	Eukaryota	Metazoa			Chordata	Craniata	Actinopterygii	Actinopteri	Neopterygii	Teleostei	Cypriniphysae	Cypriniformes				Cyprinoidea	Cyprinidae				Danio				Danio rerio
SIQLDGLVWGQSK	Eukaryota	Metazoa			Chordata	Craniata	Actinopterygii	Actinopteri	Neopterygii	Teleostei	Cypriniphysae	Cypriniformes				Cyprinoidea	Cyprinidae				Danio				Danio rerio
SLSAVFAQMATLMFINR	Eukaryota	Metazoa			Chordata	Craniata	Actinopterygii	Actinopteri	Neopterygii	Teleostei	Cypriniphysae	Cypriniformes				Cyprinoidea	Cyprinidae				Danio				Danio rerio
SLVSEPSFDAEFQHFLR	Eukaryota	Metazoa			Chordata	Craniata	Actinopterygii	Actinopteri	Neopterygii	Teleostei	Cypriniphysae	Cypriniformes				Cyprinoidea	Cyprinidae				Danio				Danio rerio
SQEPVSLDQWHR	Eukaryota	Metazoa			Chordata	Craniata	Actinopterygii	Actinopteri	Neopterygii	Teleostei	Cypriniphysae	Cypriniformes				Cyprinoidea	Cyprinidae				Danio				Danio rerio
SSCGSAAVPPELALVFGDTHTHTLSLLFSR	Eukaryota	Metazoa			Chordata	Craniata	Actinopterygii	Actinopteri	Neopterygii	Teleostei	Cypriniphysae	Cypriniformes				Cyprinoidea	Cyprinidae				Danio				Danio rerio
SSHAQSVGLIALMESINK	Eukaryota	Metazoa			Chordata	Craniata	Actinopterygii	Actinopteri	Neopterygii	Teleostei	Cypriniphysae	Cypriniformes				Cyprinoidea	Cyprinidae				Danio				Danio rerio
SSVQSLEIELQSLLAMK	Eukaryota	Metazoa			Chordata	Craniata	Actinopterygii	Actinopteri	Neopterygii	Teleostei	Cypriniphysae	Cypriniformes				Cyprinoidea	Cyprinidae				Danio				Danio rerio
STAFQDNLIHVAELAYK	Eukaryota	Metazoa			Chordata	Craniata	Actinopterygii	Actinopteri	Neopterygii	Teleostei	Cypriniphysae	Cypriniformes				Cyprinoidea	Cyprinidae				Danio				Danio rerio
SWLNAGEQEHILYLCYEDMISDLK	Eukaryota	Metazoa			Chordata	Craniata	Actinopterygii	Actinopteri	Neopterygii	Teleostei	Cypriniphysae	Cypriniformes				Cyprinoidea	Cyprinidae				Danio				Danio rerio
TCEDYQLCIIAVLPHILDTGASGR	Eukaryota	Metazoa			Chordata	Craniata	Actinopterygii	Actinopteri	Neopterygii	Teleostei	Cypriniphysae	Cypriniformes				Cyprinoidea	Cyprinidae				Danio				Danio rerio
TEDLGILYSNR	Eukaryota	Metazoa			Chordata	Craniata	Actinopterygii	Actinopteri	Neopterygii	Teleostei	Cypriniphysae	Cypriniformes				Cyprinoidea	Cyprinidae				Danio				Danio rerio
TFAEFYQDVEK	Eukaryota	Metazoa			Chordata	Craniata	Actinopterygii	Actinopteri	Neopterygii	Teleostei	Cypriniphysae	Cypriniformes				Cyprinoidea	Cyprinidae				Danio				Danio rerio
TGDVASEIATLQETVNILGR	Eukaryota	Metazoa			Chordata	Craniata	Actinopterygii	Actinopteri	Neopterygii	Teleostei	Cypriniphysae	Cypriniformes				Cyprinoidea	Cyprinidae				Danio				Danio rerio
TGGSDITGFLVEYQEEGEK	Eukaryota	Metazoa			Chordata	Craniata	Actinopterygii	Actinopteri	Neopterygii	Teleostei	Cypriniphysae	Cypriniformes				Cyprinoidea	Cyprinidae				Danio				Danio rerio
TGIFANDVK	Eukaryota	Metazoa			Chordata	Craniata	Actinopterygii	Actinopteri	Neopterygii	Teleostei	Cypriniphysae	Cypriniformes				Cyprinoidea	Cyprinidae				Danio				Danio rerio
THLHQWTCHPEQNDAIR	Eukaryota	Metazoa			Chordata	Craniata	Actinopterygii	Actinopteri	Neopterygii	Teleostei	Cypriniphysae	Cypriniformes				Cyprinoidea	Cyprinidae				Danio				Danio rerio
THPVCNLITSLPLWCPDPLSPGTGR	Eukaryota	Metazoa			Chordata	Craniata	Actinopterygii	Actinopteri	Neopterygii	Teleostei	Cypriniphysae	Cypriniformes				Cyprinoidea	Cyprinidae				Danio				Danio rerio
TLGYQPGVFEVFDVFSEQR	Eukaryota	Metazoa			Chordata	Craniata	Actinopterygii	Actinopteri	Neopterygii	Teleostei	Cypriniphysae	Cypriniformes				Cyprinoidea	Cyprinidae				Danio				Danio rerio
TIIEEAIPMVSGPKPR	Eukaryota	Metazoa			Chordata	Craniata	Actinopterygii	Actinopteri	Neopterygii	Teleostei	Cypriniphysae	Cypriniformes				Cyprinoidea	Cyprinidae				Danio				Danio rerio
TLLNLTDAGYQAVLNEVFR	Eukaryota	Metazoa			Chordata	Craniata	Actinopterygii	Actinopteri	Neopterygii	Teleostei	Cypriniphysae	Cypriniformes				Cyprinoidea	Cyprinidae				Danio				Danio rerio
TLQSLQIELQSQLSMK	Eukaryota	Metazoa			Chordata	Craniata	Actinopterygii	Actinopteri	Neopterygii	Teleostei	Cypriniphysae	Cypriniformes				Cyprinoidea	Cyprinidae				Danio				Danio rerio
TLTLLQGYDK	Eukaryota	Metazoa			Chordata	Craniata	Actinopterygii	Actinopteri	Neopterygii	Teleostei	Cypriniphysae	Cypriniformes				Cyprinoidea	Cyprinidae				Danio				Danio rerio
TMLEPYVQEYK	Eukaryota	Metazoa			Chordata	Craniata	Actinopterygii	Actinopteri	Neopterygii	Teleostei	Cypriniphysae	Cypriniformes				Cyprinoidea	Cyprinidae				Danio				Danio rerio
TNEQIHALVAAYSDAYGR	Eukaryota	Metazoa			Chordata	Craniata	Actinopterygii	Actinopteri	Neopterygii	Teleostei	Cypriniphysae	Cypriniformes				Cyprinoidea	Cyprinidae				Danio				Danio rerio
TNIPDVFAAGDVVSFPLTLVGHK	Eukaryota	Metazoa			Chordata	Craniata	Actinopterygii	Actinopteri	Neopterygii	Teleostei	Cypriniphysae	Cypriniformes				Cyprinoidea	Cyprinidae				Danio				Danio rerio
TPIGAFNGTLSSVPLHELGTLVIK	Eukaryota	Metazoa			Chordata	Craniata	Actinopterygii	Actinopteri	Neopterygii	Teleostei	Cypriniphysae	Cypriniformes				Cyprinoidea	Cyprinidae				Danio				Danio rerio
TSAFLNVEPPFVEFSKPLHDVEVK	Eukaryota	Metazoa			Chordata	Craniata	Actinopterygii	Actinopteri	Neopterygii	Teleostei	Cypriniphysae	Cypriniformes				Cyprinoidea	Cyprinidae				Danio				Danio rerio
TSITLGWVKPVYDGGSEITSYVIEQR	Eukaryota	Metazoa			Chordata	Craniata	Actinopterygii	Actinopteri	Neopterygii	Teleostei	Cypriniphysae	Cypriniformes				Cyprinoidea	Cyprinidae				Danio				Danio rerio
TSRPDTAVIYNPEEK	Eukaryota	Metazoa			Chordata	Craniata	Actinopterygii	Actinopteri	Neopterygii	Teleostei	Cypriniphysae	Cypriniformes				Cyprinoidea	Cyprinidae				Danio				Danio rerio
TTTQHQTEIAQDIFWR	Eukaryota	Metazoa			Chordata	Craniata	Actinopterygii	Actinopteri	Neopterygii	Teleostei	Cypriniphysae	Cypriniformes				Cyprinoidea	Cyprinidae				Danio				Danio rerio
TVLQIDWNIPAAHDGVNR	Eukaryota	Metazoa			Chordata	Craniata	Actinopterygii	Actinopteri	Neopterygii	Teleostei	Cypriniphysae	Cypriniformes				Cyprinoidea	Cyprinidae				Danio				Danio rerio
TVLSAASVK	Eukaryota	Metazoa			Chordata	Craniata	Actinopterygii	Actinopteri	Neopterygii	Teleostei	Cypriniphysae	Cypriniformes				Cyprinoidea	Cyprinidae				Danio				Danio rerio
TVVAVPDVTEAASGADFLIFVIPHQFIVR	Eukaryota	Metazoa			Chordata	Craniata	Actinopterygii	Actinopteri	Neopterygii	Teleostei	Cypriniphysae	Cypriniformes				Cyprinoidea	Cyprinidae				Danio				Danio rerio
TYYIQPHLNAAFLK	Eukaryota	Metazoa			Chordata	Craniata	Actinopterygii	Actinopteri	Neopterygii	Teleostei	Cypriniphysae	Cypriniformes				Cyprinoidea	Cyprinidae				Danio				Danio rerio
VAFTGSTDVGHLIQR	Eukaryota	Metazoa			Chordata	Craniata	Actinopterygii	Actinopteri	Neopterygii	Teleostei	Cypriniphysae	Cypriniformes				Cyprinoidea	Cyprinidae				Danio				Danio rerio
VAVPSTIHCDHLIEAQTGGAQDLQK	Eukaryota	Metazoa			Chordata	Craniata	Actinopterygii	Actinopteri	Neopterygii	Teleostei	Cypriniphysae	Cypriniformes				Cyprinoidea	Cyprinidae				Danio				Danio rerio
VEEIILEAIESCK	Eukaryota	Metazoa			Chordata	Craniata	Actinopterygii	Actinopteri	Neopterygii	Teleostei	Cypriniphysae	Cypriniformes				Cyprinoidea	Cyprinidae				Danio				Danio rerio
VEIQDKPLLPEGPVVVDALLK	Eukaryota	Metazoa			Chordata	Craniata	Actinopterygii	Actinopteri	Neopterygii	Teleostei	Cypriniphysae	Cypriniformes				Cyprinoidea	Cyprinidae				Danio				Danio rerio
VENAHGFATASCDVNVLDKPGPPVNFGFDEIR	Eukaryota	Metazoa			Chordata	Craniata	Actinopterygii	Actinopteri	Neopterygii	Teleostei	Cypriniphysae	Cypriniformes				Cyprinoidea	Cyprinidae				Danio				Danio rerio
VEQADLIIFQYPLYWFTIPAIMK	Eukaryota	Metazoa			Chordata	Craniata	Actinopterygii	Actinopteri	Neopterygii	Teleostei	Cypriniphysae	Cypriniformes				Cyprinoidea	Cyprinidae				Danio				Danio rerio
VETLPVELPEHIASASFETLAVVR	Eukaryota	Metazoa			Chordata	Craniata	Actinopterygii	Actinopteri	Neopterygii	Teleostei	Cypriniphysae	Cypriniformes				Cyprinoidea	Cyprinidae				Danio				Danio rerio
VGHNINVVGYVK	Eukaryota	Metazoa			Chordata	Craniata	Actinopterygii	Actinopteri	Neopterygii	Teleostei	Cypriniphysae	Cypriniformes				Cyprinoidea	Cyprinidae				Danio				Danio rerio
VHIMPDNPEILLAK	Eukaryota	Metazoa			Chordata	Craniata	Actinopterygii	Actinopteri	Neopterygii	Teleostei	Cypriniphysae	Cypriniformes				Cyprinoidea	Cyprinidae				Danio				Danio rerio
VLAVTVETDYTFPLAEK	Eukaryota	Metazoa			Chordata	Craniata	Actinopterygii	Actinopteri	Neopterygii	Teleostei	Cypriniphysae	Cypriniformes				Cyprinoidea	Cyprinidae				Danio				Danio rerio
VLLSAATENTFLLK	Eukaryota	Metazoa			Chordata	Craniata	Actinopterygii	Actinopteri	Neopterygii	Teleostei	Cypriniphysae	Cypriniformes				Cyprinoidea	Cyprinidae				Danio				Danio rerio
VLNHLHTQLQNVGFQIETIGK	Eukaryota	Metazoa			Chordata	Craniata	Actinopterygii	Actinopteri	Neopterygii	Teleostei	Cypriniphysae	Cypriniformes				Cyprinoidea	Cyprinidae				Danio				Danio rerio
VLQQLTHLQEDEPQLEVLYDK	Eukaryota	Metazoa			Chordata	Craniata	Actinopterygii	Actinopteri	Neopterygii	Teleostei	Cypriniphysae	Cypriniformes				Cyprinoidea	Cyprinidae				Danio				Danio rerio
VISGVQDLEYTVTDVIEGK	Eukaryota	Metazoa			Chordata	Craniata	Actinopterygii	Actinopteri	Neopterygii	Teleostei	Cypriniphysae	Cypriniformes				Cyprinoidea	Cyprinidae				Danio				Danio rerio
VMGNAGHPSSLKPIMK	Eukaryota	Metazoa			Chordata	Craniata	Actinopterygii	Actinopteri	Neopterygii	Teleostei	Cypriniphysae	Cypriniformes				Cyprinoidea	Cyprinidae				Danio				Danio rerio
VNYSQKPDGPAPIIDVVR	Eukaryota	Metazoa			Chordata	Craniata	Actinopterygii	Actinopteri	Neopterygii	Teleostei	Cypriniphysae	Cypriniformes				Cyprinoidea	Cyprinidae				Danio				Danio rerio
VPQEDGGDPITHYIVER	Eukaryota	Metazoa			Chordata	Craniata	Actinopterygii	Actinopteri	Neopterygii	Teleostei	Cypriniphysae	Cypriniformes				Cyprinoidea	Cyprinidae				Danio				Danio rerio
VRPDDVDVTELSNEGLK	Eukaryota	Metazoa			Chordata	Craniata	Actinopterygii	Actinopteri	Neopterygii	Teleostei	Cypriniphysae	Cypriniformes				Cyprinoidea	Cyprinidae				Danio				Danio rerio
VSAILSSQKPVVVR	Eukaryota	Metazoa			Chordata	Craniata	Actinopterygii	Actinopteri	Neopterygii	Teleostei	Cypriniphysae	Cypriniformes				Cyprinoidea	Cyprinidae				Danio				Danio rerio
VSPFEGEQYHIAPK	Eukaryota	Metazoa			Chordata	Craniata	Actinopterygii	Actinopteri	Neopterygii	Teleostei	Cypriniphysae	Cypriniformes				Cyprinoidea	Cyprinidae				Danio				Danio rerio
VTVQALSGLK	Eukaryota	Metazoa			Chordata	Craniata	Actinopterygii	Actinopteri	Neopterygii	Teleostei	Cypriniphysae	Cypriniformes				Cyprinoidea	Cyprinidae				Danio				Danio rerio
VVEFIHQGIQIGQDVK	Eukaryota	Metazoa			Chordata	Craniata	Actinopterygii	Actinopteri	Neopterygii	Teleostei	Cypriniphysae	Cypriniformes				Cyprinoidea	Cyprinidae				Danio				Danio rerio
VYLIYEGYQGLVDGGDHIK	Eukaryota	Metazoa			Chordata	Craniata	Actinopterygii	Actinopteri	Neopterygii	Teleostei	Cypriniphysae	Cypriniformes				Cyprinoidea	Cyprinidae				Danio				Danio rerio
WDGGTPIK	Eukaryota	Metazoa			Chordata	Craniata	Actinopterygii	Actinopteri	Neopterygii	Teleostei	Cypriniphysae	Cypriniformes				Cyprinoidea	Cyprinidae				Danio				Danio rerio
WEDLQNYLHSVNAER	Eukaryota	Metazoa			Chordata	Craniata	Actinopterygii	Actinopteri	Neopterygii	Teleostei	Cypriniphysae	Cypriniformes				Cyprinoidea	Cyprinidae				Danio				Danio rerio
WEEAVDQFWNHVSELTTR	Eukaryota	Metazoa			Chordata	Craniata	Actinopterygii	Actinopteri	Neopterygii	Teleostei	Cypriniphysae	Cypriniformes				Cyprinoidea	Cyprinidae				Danio				Danio rerio
WLGLLGEEPVPHAETILAAVAK	Eukaryota	Metazoa			Chordata	Craniata	Actinopterygii	Actinopteri	Neopterygii	Teleostei	Cypriniphysae	Cypriniformes				Cyprinoidea	Cyprinidae				Danio				Danio rerio
WLLDTLPAVATPVVLK	Eukaryota	Metazoa			Chordata	Craniata	Actinopterygii	Actinopteri	Neopterygii	Teleostei	Cypriniphysae	Cypriniformes				Cyprinoidea	Cyprinidae				Danio				Danio rerio
WVESQFNLLETLAQIR	Eukaryota	Metazoa			Chordata	Craniata	Actinopterygii	Actinopteri	Neopterygii	Teleostei	Cypriniphysae	Cypriniformes				Cyprinoidea	Cyprinidae				Danio				Danio rerio
YAALMDGLVLQGFYQLLEPK	Eukaryota	Metazoa			Chordata	Craniata	Actinopterygii	Actinopteri	Neopterygii	Teleostei	Cypriniphysae	Cypriniformes				Cyprinoidea	Cyprinidae				Danio				Danio rerio
YCVAVPTCPAELLRPIHEIATEAISK	Eukaryota	Metazoa			Chordata	Craniata	Actinopterygii	Actinopteri	Neopterygii	Teleostei	Cypriniphysae	Cypriniformes				Cyprinoidea	Cyprinidae				Danio				Danio rerio
YDAEEIEAEVSSDVTTEIHNIITTDAIK	Eukaryota	Metazoa			Chordata	Craniata	Actinopterygii	Actinopteri	Neopterygii	Teleostei	Cypriniphysae	Cypriniformes				Cyprinoidea	Cyprinidae				Danio				Danio rerio
YDTTHFLVNTGSLLSVLLPK	Eukaryota	Metazoa			Chordata	Craniata	Actinopterygii	Actinopteri	Neopterygii	Teleostei	Cypriniphysae	Cypriniformes				Cyprinoidea	Cyprinidae				Danio				Danio rerio
YEALLLSGIVQEGLAK	Eukaryota	Metazoa			Chordata	Craniata	Actinopterygii	Actinopteri	Neopterygii	Teleostei	Cypriniphysae	Cypriniformes				Cyprinoidea	Cyprinidae				Danio				Danio rerio
YEQTGNQDLAEALSR	Eukaryota	Metazoa			Chordata	Craniata	Actinopterygii	Actinopteri	Neopterygii	Teleostei	Cypriniphysae	Cypriniformes				Cyprinoidea	Cyprinidae				Danio				Danio rerio
YFGGFGNLYNTEAIMANPK	Eukaryota	Metazoa			Chordata	Craniata	Actinopterygii	Actinopteri	Neopterygii	Teleostei	Cypriniphysae	Cypriniformes				Cyprinoidea	Cyprinidae				Danio				Danio rerio
YGYLESFNLVDGR	Eukaryota	Metazoa			Chordata	Craniata	Actinopterygii	Actinopteri	Neopterygii	Teleostei	Cypriniphysae	Cypriniformes				Cyprinoidea	Cyprinidae				Danio				Danio rerio
YHGAQAGAGGAAGHHVYPGAQGDGR	Eukaryota	Metazoa			Chordata	Craniata	Actinopterygii	Actinopteri	Neopterygii	Teleostei	Cypriniphysae	Cypriniformes				Cyprinoidea	Cyprinidae				Danio				Danio rerio
YLEQHFPQLNVENRPDILK	Eukaryota	Metazoa			Chordata	Craniata	Actinopterygii	Actinopteri	Neopterygii	Teleostei	Cypriniphysae	Cypriniformes				Cyprinoidea	Cyprinidae				Danio				Danio rerio
YLGLPSEGPFKPDHYR	Eukaryota	Metazoa			Chordata	Craniata	Actinopterygii	Actinopteri	Neopterygii	Teleostei	Cypriniphysae	Cypriniformes				Cyprinoidea	Cyprinidae				Danio				Danio rerio
YLSPFHDIPMFADEAQNIFHMVVEVPR	Eukaryota	Metazoa			Chordata	Craniata	Actinopterygii	Actinopteri	Neopterygii	Teleostei	Cypriniphysae	Cypriniformes				Cyprinoidea	Cyprinidae				Danio				Danio rerio
YITELTVSSKPHQVK	Eukaryota	Metazoa			Chordata	Craniata	Actinopterygii	Actinopteri	Neopterygii	Teleostei	Cypriniphysae	Cypriniformes				Cyprinoidea	Cyprinidae				Danio				Danio rerio
YPALTKPENQDINWGLLEGETR	Eukaryota	Metazoa			Chordata	Craniata	Actinopterygii	Actinopteri	Neopterygii	Teleostei	Cypriniphysae	Cypriniformes				Cyprinoidea	Cyprinidae				Danio				Danio rerio
YTLTLDNTFFR	Eukaryota	Metazoa			Chordata	Craniata	Actinopterygii	Actinopteri	Neopterygii	Teleostei	Cypriniphysae	Cypriniformes				Cyprinoidea	Cyprinidae				Danio				Danio rerio
YTNMLNGYQFQVSSLEEQLIQLR	Eukaryota	Metazoa			Chordata	Craniata	Actinopterygii	Actinopteri	Neopterygii	Teleostei	Cypriniphysae	Cypriniformes				Cyprinoidea	Cyprinidae				Danio				Danio rerio
AAAQIGITAVHIK	Eukaryota	Metazoa			Chordata	Craniata	Actinopterygii	Actinopteri	Neopterygii	Teleostei	Cypriniphysae	Cypriniformes				Cyprinoidea	Cyprinidae				Danio				Danio rerio
AALAGGTTIIVDHVVPEPGTSLISAFNQWR	Eukaryota	Metazoa			Chordata	Craniata	Actinopterygii	Actinopteri	Neopterygii	Teleostei	Cypriniphysae	Cypriniformes				Cyprinoidea	Cyprinidae				Danio				Danio rerio
AAQIELLHALAGIAAENNLGEGILVK	Eukaryota	Metazoa			Chordata	Craniata	Actinopterygii	Actinopteri	Neopterygii	Teleostei	Cypriniphysae	Cypriniformes				Cyprinoidea	Cyprinidae				Danio				Danio rerio
AEYTSCHLEVPSCLHADAGQYK	Eukaryota	Metazoa			Chordata	Craniata	Actinopterygii	Actinopteri	Neopterygii	Teleostei	Cypriniphysae	Cypriniformes				Cyprinoidea	Cyprinidae				Danio				Danio rerio
AFAEFLTEEIK	Eukaryota	Metazoa			Chordata	Craniata	Actinopterygii	Actinopteri	Neopterygii	Teleostei	Cypriniphysae	Cypriniformes				Cyprinoidea	Cyprinidae				Danio				Danio rerio
AGLGSGLTLQGTVHPELNHSGELTVK	Eukaryota	Metazoa			Chordata	Craniata	Actinopterygii	Actinopteri	Neopterygii	Teleostei	Cypriniphysae	Cypriniformes				Cyprinoidea	Cyprinidae				Danio				Danio rerio
AHNQDLGLPGSCLPHFSTIPFLYCTANEICYYASR	Eukaryota	Metazoa			Chordata	Craniata	Actinopterygii	Actinopteri	Neopterygii	Teleostei	Cypriniphysae	Cypriniformes				Cyprinoidea	Cyprinidae				Danio				Danio rerio
AHPNVLVEFYAPWCGHCK	Eukaryota	Metazoa			Chordata	Craniata	Actinopterygii	Actinopteri	Neopterygii	Teleostei	Cypriniphysae	Cypriniformes				Cyprinoidea	Cyprinidae				Danio				Danio rerio
ALDLDALDNSHPIEVDVGHPSEVDEIFDAISYSK	Eukaryota	Metazoa			Chordata	Craniata	Actinopterygii	Actinopteri	Neopterygii	Teleostei	Cypriniphysae	Cypriniformes				Cyprinoidea	Cyprinidae				Danio				Danio rerio
ALFPHVLCHNCTVEFNFGQNETPFFPK	Eukaryota	Metazoa			Chordata	Craniata	Actinopterygii	Actinopteri	Neopterygii	Teleostei	Cypriniphysae	Cypriniformes				Cyprinoidea	Cyprinidae				Danio				Danio rerio
ALLVELQLLESK	Eukaryota	Metazoa			Chordata	Craniata	Actinopterygii	Actinopteri	Neopterygii	Teleostei	Cypriniphysae	Cypriniformes				Cyprinoidea	Cyprinidae				Danio				Danio rerio
ALVWESLAFK	Eukaryota	Metazoa			Chordata	Craniata	Actinopterygii	Actinopteri	Neopterygii	Teleostei	Cypriniphysae	Cypriniformes				Cyprinoidea	Cyprinidae				Danio				Danio rerio
APEPISLHLAELTASQFLDIWNK	Eukaryota	Metazoa			Chordata	Craniata	Actinopterygii	Actinopteri	Neopterygii	Teleostei	Cypriniphysae	Cypriniformes				Cyprinoidea	Cyprinidae				Danio				Danio rerio
APHSVQDIVLNLFVQK	Eukaryota	Metazoa			Chordata	Craniata	Actinopterygii	Actinopteri	Neopterygii	Teleostei	Cypriniphysae	Cypriniformes				Cyprinoidea	Cyprinidae				Danio				Danio rerio
AQVDEFLSWQHTNIR	Eukaryota	Metazoa			Chordata	Craniata	Actinopterygii	Actinopteri	Neopterygii	Teleostei	Cypriniphysae	Cypriniformes				Cyprinoidea	Cyprinidae				Danio				Danio rerio
ASNGDAWLEVHGK	Eukaryota	Metazoa			Chordata	Craniata	Actinopterygii	Actinopteri	Neopterygii	Teleostei	Cypriniphysae	Cypriniformes				Cyprinoidea	Cyprinidae				Danio				Danio rerio
ASVLEGELEIIDSDIK	Eukaryota	Metazoa			Chordata	Craniata	Actinopterygii	Actinopteri	Neopterygii	Teleostei	Cypriniphysae	Cypriniformes				Cyprinoidea	Cyprinidae				Danio				Danio rerio
ATGKPVAATLCIGPDGDMHGVTPGECAVR	Eukaryota	Metazoa			Chordata	Craniata	Actinopterygii	Actinopteri	Neopterygii	Teleostei	Cypriniphysae	Cypriniformes				Cyprinoidea	Cyprinidae				Danio				Danio rerio
AVIAELVSVAELAHPLENGNHFPLFLLCLQQASK	Eukaryota	Metazoa			Chordata	Craniata	Actinopterygii	Actinopteri	Neopterygii	Teleostei	Cypriniphysae	Cypriniformes				Cyprinoidea	Cyprinidae				Danio				Danio rerio
AVSHLNNTMLFGQK	Eukaryota	Metazoa			Chordata	Craniata	Actinopterygii	Actinopteri	Neopterygii	Teleostei	Cypriniphysae	Cypriniformes				Cyprinoidea	Cyprinidae				Danio				Danio rerio
CHEEIVQVLGYDR	Eukaryota	Metazoa			Chordata	Craniata	Actinopterygii	Actinopteri	Neopterygii	Teleostei	Cypriniphysae	Cypriniformes				Cyprinoidea	Cyprinidae				Danio				Danio rerio
CLEDLQHFIAELDEVVR	Eukaryota	Metazoa			Chordata	Craniata	Actinopterygii	Actinopteri	Neopterygii	Teleostei	Cypriniphysae	Cypriniformes				Cyprinoidea	Cyprinidae				Danio				Danio rerio
CQFTLKPLSDTVGVFLQQLQAEDR	Eukaryota	Metazoa			Chordata	Craniata	Actinopterygii	Actinopteri	Neopterygii	Teleostei	Cypriniphysae	Cypriniformes				Cyprinoidea	Cyprinidae				Danio				Danio rerio
CVCYEGYTGHDCSQLTCPNDCK	Eukaryota	Metazoa			Chordata	Craniata	Actinopterygii	Actinopteri	Neopterygii	Teleostei	Cypriniphysae	Cypriniformes				Cyprinoidea	Cyprinidae				Danio				Danio rerio
DADADVAGAPGAPLDVHCLDANK	Eukaryota	Metazoa			Chordata	Craniata	Actinopterygii	Actinopteri	Neopterygii	Teleostei	Cypriniphysae	Cypriniformes				Cyprinoidea	Cyprinidae				Danio				Danio rerio
DAQHYYNSEAFGVDFSKPEIAAAEINK	Eukaryota	Metazoa			Chordata	Craniata	Actinopterygii	Actinopteri	Neopterygii	Teleostei	Cypriniphysae	Cypriniformes				Cyprinoidea	Cyprinidae				Danio				Danio rerio
DAVIGIFADLFPQFSR	Eukaryota	Metazoa			Chordata	Craniata	Actinopterygii	Actinopteri	Neopterygii	Teleostei	Cypriniphysae	Cypriniformes				Cyprinoidea	Cyprinidae				Danio				Danio rerio
DCAAADSFNYK	Eukaryota	Metazoa			Chordata	Craniata	Actinopterygii	Actinopteri	Neopterygii	Teleostei	Cypriniphysae	Cypriniformes				Cyprinoidea	Cyprinidae				Danio				Danio rerio
DDALSELSGIPECIFVHAGGFIGGNK	Eukaryota	Metazoa			Chordata	Craniata	Actinopterygii	Actinopteri	Neopterygii	Teleostei	Cypriniphysae	Cypriniformes				Cyprinoidea	Cyprinidae				Danio				Danio rerio
DDANNDPQWSEEQLLAAGFDLAGLTIGR	Eukaryota	Metazoa			Chordata	Craniata	Actinopterygii	Actinopteri	Neopterygii	Teleostei	Cypriniphysae	Cypriniformes				Cyprinoidea	Cyprinidae				Danio				Danio rerio
DDEHAAVALSSLIR	Eukaryota	Metazoa			Chordata	Craniata	Actinopterygii	Actinopteri	Neopterygii	Teleostei	Cypriniphysae	Cypriniformes				Cyprinoidea	Cyprinidae				Danio				Danio rerio
DDPLIMLALNSGK	Eukaryota	Metazoa			Chordata	Craniata	Actinopterygii	Actinopteri	Neopterygii	Teleostei	Cypriniphysae	Cypriniformes				Cyprinoidea	Cyprinidae				Danio				Danio rerio
DDTVTFGLK	Eukaryota	Metazoa			Chordata	Craniata	Actinopterygii	Actinopteri	Neopterygii	Teleostei	Cypriniphysae	Cypriniformes				Cyprinoidea	Cyprinidae				Danio				Danio rerio
DFFHGLGIESIR	Eukaryota	Metazoa			Chordata	Craniata	Actinopterygii	Actinopteri	Neopterygii	Teleostei	Cypriniphysae	Cypriniformes				Cyprinoidea	Cyprinidae				Danio				Danio rerio
DFLSWIHK	Eukaryota	Metazoa			Chordata	Craniata	Actinopterygii	Actinopteri	Neopterygii	Teleostei	Cypriniphysae	Cypriniformes				Cyprinoidea	Cyprinidae				Danio				Danio rerio
DHTSPLALITGMQYPLAQLIR	Eukaryota	Metazoa			Chordata	Craniata	Actinopterygii	Actinopteri	Neopterygii	Teleostei	Cypriniphysae	Cypriniformes				Cyprinoidea	Cyprinidae				Danio				Danio rerio
DLHSGVFGGSVHEAMTDLIALMGTLVDNK	Eukaryota	Metazoa			Chordata	Craniata	Actinopterygii	Actinopteri	Neopterygii	Teleostei	Cypriniphysae	Cypriniformes				Cyprinoidea	Cyprinidae				Danio				Danio rerio
DLLFSVDDSISESIGGVILFHETLYQK	Eukaryota	Metazoa			Chordata	Craniata	Actinopterygii	Actinopteri	Neopterygii	Teleostei	Cypriniphysae	Cypriniformes				Cyprinoidea	Cyprinidae				Danio				Danio rerio
DILLRPELEEIMANHPTR	Eukaryota	Metazoa			Chordata	Craniata	Actinopterygii	Actinopteri	Neopterygii	Teleostei	Cypriniphysae	Cypriniformes				Cyprinoidea	Cyprinidae				Danio				Danio rerio
DLLVPDSGCHYDQLIEINLDELKPHINGPFTPDLAHPVSDIGSVAEK	Eukaryota	Metazoa			Chordata	Craniata	Actinopterygii	Actinopteri	Neopterygii	Teleostei	Cypriniphysae	Cypriniformes				Cyprinoidea	Cyprinidae				Danio				Danio rerio
DLMQLVSSLAR	Eukaryota	Metazoa			Chordata	Craniata	Actinopterygii	Actinopteri	Neopterygii	Teleostei	Cypriniphysae	Cypriniformes				Cyprinoidea	Cyprinidae				Danio				Danio rerio
DLPITEAVFNSLVVGHAR	Eukaryota	Metazoa			Chordata	Craniata	Actinopterygii	Actinopteri	Neopterygii	Teleostei	Cypriniphysae	Cypriniformes				Cyprinoidea	Cyprinidae				Danio				Danio rerio
DIVATNGVIHLIDEVLMPDSAK	Eukaryota	Metazoa			Chordata	Craniata	Actinopterygii	Actinopteri	Neopterygii	Teleostei	Cypriniphysae	Cypriniformes				Cyprinoidea	Cyprinidae				Danio				Danio rerio
DNTSDDIGWVTVTSTHK	Eukaryota	Metazoa			Chordata	Craniata	Actinopterygii	Actinopteri	Neopterygii	Teleostei	Cypriniphysae	Cypriniformes				Cyprinoidea	Cyprinidae				Danio				Danio rerio
DPLQLNLPIQQIDTSK	Eukaryota	Metazoa			Chordata	Craniata	Actinopterygii	Actinopteri	Neopterygii	Teleostei	Cypriniphysae	Cypriniformes				Cyprinoidea	Cyprinidae				Danio				Danio rerio
DQLISLYDSFTK	Eukaryota	Metazoa			Chordata	Craniata	Actinopterygii	Actinopteri	Neopterygii	Teleostei	Cypriniphysae	Cypriniformes				Cyprinoidea	Cyprinidae				Danio				Danio rerio
DQSPLNIGLLLNLEHALSVLER	Eukaryota	Metazoa			Chordata	Craniata	Actinopterygii	Actinopteri	Neopterygii	Teleostei	Cypriniphysae	Cypriniformes				Cyprinoidea	Cyprinidae				Danio				Danio rerio
DSKPEDWDER	Eukaryota	Metazoa			Chordata	Craniata	Actinopterygii	Actinopteri	Neopterygii	Teleostei	Cypriniphysae	Cypriniformes				Cyprinoidea	Cyprinidae				Danio				Danio rerio
DSIFQHPALHVLICK	Eukaryota	Metazoa			Chordata	Craniata	Actinopterygii	Actinopteri	Neopterygii	Teleostei	Cypriniphysae	Cypriniformes				Cyprinoidea	Cyprinidae				Danio				Danio rerio
DTEFLVLHLDPHVDHLFR	Eukaryota	Metazoa			Chordata	Craniata	Actinopterygii	Actinopteri	Neopterygii	Teleostei	Cypriniphysae	Cypriniformes				Cyprinoidea	Cyprinidae				Danio				Danio rerio
DTSGENIAESLVAEGLAMVR	Eukaryota	Metazoa			Chordata	Craniata	Actinopterygii	Actinopteri	Neopterygii	Teleostei	Cypriniphysae	Cypriniformes				Cyprinoidea	Cyprinidae				Danio				Danio rerio
DVTEALILQVFSQIGPCK	Eukaryota	Metazoa			Chordata	Craniata	Actinopterygii	Actinopteri	Neopterygii	Teleostei	Cypriniphysae	Cypriniformes				Cyprinoidea	Cyprinidae				Danio				Danio rerio
DYSAYYATISDLQAK	Eukaryota	Metazoa			Chordata	Craniata	Actinopterygii	Actinopteri	Neopterygii	Teleostei	Cypriniphysae	Cypriniformes				Cyprinoidea	Cyprinidae				Danio				Danio rerio
DYVIVAWK	Eukaryota	Metazoa			Chordata	Craniata	Actinopterygii	Actinopteri	Neopterygii	Teleostei	Cypriniphysae	Cypriniformes				Cyprinoidea	Cyprinidae				Danio				Danio rerio
DYYFALSHTVR	Eukaryota	Metazoa			Chordata	Craniata	Actinopterygii	Actinopteri	Neopterygii	Teleostei	Cypriniphysae	Cypriniformes				Cyprinoidea	Cyprinidae				Danio				Danio rerio
EEALVLDSSK	Eukaryota	Metazoa			Chordata	Craniata	Actinopterygii	Actinopteri	Neopterygii	Teleostei	Cypriniphysae	Cypriniformes				Cyprinoidea	Cyprinidae				Danio				Danio rerio
EGATVYATGTHAHLEDGK	Eukaryota	Metazoa			Chordata	Craniata	Actinopterygii	Actinopteri	Neopterygii	Teleostei	Cypriniphysae	Cypriniformes				Cyprinoidea	Cyprinidae				Danio				Danio rerio
EGGLGEAVLSAVGEEPGIVVHR	Eukaryota	Metazoa			Chordata	Craniata	Actinopterygii	Actinopteri	Neopterygii	Teleostei	Cypriniphysae	Cypriniformes				Cyprinoidea	Cyprinidae				Danio				Danio rerio
EHAIPLLDAQVATGGIIDPVNSHR	Eukaryota	Metazoa			Chordata	Craniata	Actinopterygii	Actinopteri	Neopterygii	Teleostei	Cypriniphysae	Cypriniformes				Cyprinoidea	Cyprinidae				Danio				Danio rerio
EHLIANEVSILR	Eukaryota	Metazoa			Chordata	Craniata	Actinopterygii	Actinopteri	Neopterygii	Teleostei	Cypriniphysae	Cypriniformes				Cyprinoidea	Cyprinidae				Danio				Danio rerio
EIASEPIADHYFYTADFK	Eukaryota	Metazoa			Chordata	Craniata	Actinopterygii	Actinopteri	Neopterygii	Teleostei	Cypriniphysae	Cypriniformes				Cyprinoidea	Cyprinidae				Danio				Danio rerio
ELFDPVISDR	Eukaryota	Metazoa			Chordata	Craniata	Actinopterygii	Actinopteri	Neopterygii	Teleostei	Cypriniphysae	Cypriniformes				Cyprinoidea	Cyprinidae				Danio				Danio rerio
ELTDAISHVDR	Eukaryota	Metazoa			Chordata	Craniata	Actinopterygii	Actinopteri	Neopterygii	Teleostei	Cypriniphysae	Cypriniformes				Cyprinoidea	Cyprinidae				Danio				Danio rerio
ELWDWLYSLEAEK	Eukaryota	Metazoa			Chordata	Craniata	Actinopterygii	Actinopteri	Neopterygii	Teleostei	Cypriniphysae	Cypriniformes				Cyprinoidea	Cyprinidae				Danio				Danio rerio
ELWQAALSSLNPNPTDSCPLYLSHAAVAALPSR	Eukaryota	Metazoa			Chordata	Craniata	Actinopterygii	Actinopteri	Neopterygii	Teleostei	Cypriniphysae	Cypriniformes				Cyprinoidea	Cyprinidae				Danio				Danio rerio
ENVLSEILGTR	Eukaryota	Metazoa			Chordata	Craniata	Actinopterygii	Actinopteri	Neopterygii	Teleostei	Cypriniphysae	Cypriniformes				Cyprinoidea	Cyprinidae				Danio				Danio rerio
EPLPSLEAIYLITPTDK	Eukaryota	Metazoa			Chordata	Craniata	Actinopterygii	Actinopteri	Neopterygii	Teleostei	Cypriniphysae	Cypriniformes				Cyprinoidea	Cyprinidae				Danio				Danio rerio
ESAAVSSMHESFTSK	Eukaryota	Metazoa			Chordata	Craniata	Actinopterygii	Actinopteri	Neopterygii	Teleostei	Cypriniphysae	Cypriniformes				Cyprinoidea	Cyprinidae				Danio				Danio rerio
ESGDLWLGCHPNAFK	Eukaryota	Metazoa			Chordata	Craniata	Actinopterygii	Actinopteri	Neopterygii	Teleostei	Cypriniphysae	Cypriniformes				Cyprinoidea	Cyprinidae				Danio				Danio rerio
EVGVELFDEAHK	Eukaryota	Metazoa			Chordata	Craniata	Actinopterygii	Actinopteri	Neopterygii	Teleostei	Cypriniphysae	Cypriniformes				Cyprinoidea	Cyprinidae				Danio				Danio rerio
EVNQEVYSFLASAGAK	Eukaryota	Metazoa			Chordata	Craniata	Actinopterygii	Actinopteri	Neopterygii	Teleostei	Cypriniphysae	Cypriniformes				Cyprinoidea	Cyprinidae				Danio				Danio rerio
EVVGSIELCR	Eukaryota	Metazoa			Chordata	Craniata	Actinopterygii	Actinopteri	Neopterygii	Teleostei	Cypriniphysae	Cypriniformes				Cyprinoidea	Cyprinidae				Danio				Danio rerio
EVYPHVPTVISICLK	Eukaryota	Metazoa			Chordata	Craniata	Actinopterygii	Actinopteri	Neopterygii	Teleostei	Cypriniphysae	Cypriniformes				Cyprinoidea	Cyprinidae				Danio				Danio rerio
EYVVSLSGPLTHR	Eukaryota	Metazoa			Chordata	Craniata	Actinopterygii	Actinopteri	Neopterygii	Teleostei	Cypriniphysae	Cypriniformes				Cyprinoidea	Cyprinidae				Danio				Danio rerio
FAEAEHWLDYFPPLAVEDLK	Eukaryota	Metazoa			Chordata	Craniata	Actinopterygii	Actinopteri	Neopterygii	Teleostei	Cypriniphysae	Cypriniformes				Cyprinoidea	Cyprinidae				Danio				Danio rerio
FAIEIHPTGEVSSYTATADYAYDGK	Eukaryota	Metazoa			Chordata	Craniata	Actinopterygii	Actinopteri	Neopterygii	Teleostei	Cypriniphysae	Cypriniformes				Cyprinoidea	Cyprinidae				Danio				Danio rerio
FALIHPSLVEGLVLINVDPCAEGWIDWAASK	Eukaryota	Metazoa			Chordata	Craniata	Actinopterygii	Actinopteri	Neopterygii	Teleostei	Cypriniphysae	Cypriniformes				Cyprinoidea	Cyprinidae				Danio				Danio rerio
FANQILSYGSELDADHPGFTDTVYR	Eukaryota	Metazoa			Chordata	Craniata	Actinopterygii	Actinopteri	Neopterygii	Teleostei	Cypriniphysae	Cypriniformes				Cyprinoidea	Cyprinidae				Danio				Danio rerio
FAVDEEFPDLSQHNNHMSK	Eukaryota	Metazoa			Chordata	Craniata	Actinopterygii	Actinopteri	Neopterygii	Teleostei	Cypriniphysae	Cypriniformes				Cyprinoidea	Cyprinidae				Danio				Danio rerio
FDPYEHEAVFHAPVEGK	Eukaryota	Metazoa			Chordata	Craniata	Actinopterygii	Actinopteri	Neopterygii	Teleostei	Cypriniphysae	Cypriniformes				Cyprinoidea	Cyprinidae				Danio				Danio rerio
FEQGFITDPVVLSPHHTVGDVLEAK	Eukaryota	Metazoa			Chordata	Craniata	Actinopterygii	Actinopteri	Neopterygii	Teleostei	Cypriniphysae	Cypriniformes				Cyprinoidea	Cyprinidae				Danio				Danio rerio
FGQITPMEIDILFQLSGLHSQTGR	Eukaryota	Metazoa			Chordata	Craniata	Actinopterygii	Actinopteri	Neopterygii	Teleostei	Cypriniphysae	Cypriniformes				Cyprinoidea	Cyprinidae				Danio				Danio rerio
FHLPVDLLSLELAK	Eukaryota	Metazoa			Chordata	Craniata	Actinopterygii	Actinopteri	Neopterygii	Teleostei	Cypriniphysae	Cypriniformes				Cyprinoidea	Cyprinidae				Danio				Danio rerio
FHTPDHWFPADLQK	Eukaryota	Metazoa			Chordata	Craniata	Actinopterygii	Actinopteri	Neopterygii	Teleostei	Cypriniphysae	Cypriniformes				Cyprinoidea	Cyprinidae				Danio				Danio rerio
FLAGEFTTPEFIQTLVIALQR	Eukaryota	Metazoa			Chordata	Craniata	Actinopterygii	Actinopteri	Neopterygii	Teleostei	Cypriniphysae	Cypriniformes				Cyprinoidea	Cyprinidae				Danio				Danio rerio
FICHVVGITYQNIEYR	Eukaryota	Metazoa			Chordata	Craniata	Actinopterygii	Actinopteri	Neopterygii	Teleostei	Cypriniphysae	Cypriniformes				Cyprinoidea	Cyprinidae				Danio				Danio rerio
FLQDSVEHCIIGVTILSQLTNEINQADSTHPLTK	Eukaryota	Metazoa			Chordata	Craniata	Actinopterygii	Actinopteri	Neopterygii	Teleostei	Cypriniphysae	Cypriniformes				Cyprinoidea	Cyprinidae				Danio				Danio rerio
FITAEVVEQYFQHLIR	Eukaryota	Metazoa			Chordata	Craniata	Actinopterygii	Actinopteri	Neopterygii	Teleostei	Cypriniphysae	Cypriniformes				Cyprinoidea	Cyprinidae				Danio				Danio rerio
FNLPVDMVAFEHAK	Eukaryota	Metazoa			Chordata	Craniata	Actinopterygii	Actinopteri	Neopterygii	Teleostei	Cypriniphysae	Cypriniformes				Cyprinoidea	Cyprinidae				Danio				Danio rerio
FQLSPFNHSHQVAK	Eukaryota	Metazoa			Chordata	Craniata	Actinopterygii	Actinopteri	Neopterygii	Teleostei	Cypriniphysae	Cypriniformes				Cyprinoidea	Cyprinidae				Danio				Danio rerio
FSCVPVDFEVVHVNSSSTSEDDISNAIMAIR	Eukaryota	Metazoa			Chordata	Craniata	Actinopterygii	Actinopteri	Neopterygii	Teleostei	Cypriniphysae	Cypriniformes				Cyprinoidea	Cyprinidae				Danio				Danio rerio
FVDPLFYEYAGTWPK	Eukaryota	Metazoa			Chordata	Craniata	Actinopterygii	Actinopteri	Neopterygii	Teleostei	Cypriniphysae	Cypriniformes				Cyprinoidea	Cyprinidae				Danio				Danio rerio
FYFEHLLSK	Eukaryota	Metazoa			Chordata	Craniata	Actinopterygii	Actinopteri	Neopterygii	Teleostei	Cypriniphysae	Cypriniformes				Cyprinoidea	Cyprinidae				Danio				Danio rerio
GETVSCWYTGTLEDGTVFDTNIPATAK	Eukaryota	Metazoa			Chordata	Craniata	Actinopterygii	Actinopteri	Neopterygii	Teleostei	Cypriniphysae	Cypriniformes				Cyprinoidea	Cyprinidae				Danio				Danio rerio
GEYPIESVLTQHLIAR	Eukaryota	Metazoa			Chordata	Craniata	Actinopterygii	Actinopteri	Neopterygii	Teleostei	Cypriniphysae	Cypriniformes				Cyprinoidea	Cyprinidae				Danio				Danio rerio
GFGFIEYEKPQSSLDAVSSMNLFDLGGQYLR	Eukaryota	Metazoa			Chordata	Craniata	Actinopterygii	Actinopteri	Neopterygii	Teleostei	Cypriniphysae	Cypriniformes				Cyprinoidea	Cyprinidae				Danio				Danio rerio
GFGGPQGLTIIESVLHEVAVK	Eukaryota	Metazoa			Chordata	Craniata	Actinopterygii	Actinopteri	Neopterygii	Teleostei	Cypriniphysae	Cypriniformes				Cyprinoidea	Cyprinidae				Danio				Danio rerio
GHLDNISNNLLIGAVNIENDGVNK	Eukaryota	Metazoa			Chordata	Craniata	Actinopterygii	Actinopteri	Neopterygii	Teleostei	Cypriniphysae	Cypriniformes				Cyprinoidea	Cyprinidae				Danio				Danio rerio
GHIKPDAVGMSLIK	Eukaryota	Metazoa			Chordata	Craniata	Actinopterygii	Actinopteri	Neopterygii	Teleostei	Cypriniphysae	Cypriniformes				Cyprinoidea	Cyprinidae				Danio				Danio rerio
GLDHLTLAEFVK	Eukaryota	Metazoa			Chordata	Craniata	Actinopterygii	Actinopteri	Neopterygii	Teleostei	Cypriniphysae	Cypriniformes				Cyprinoidea	Cyprinidae				Danio				Danio rerio
GLEYNVLHLIEGAEYK	Eukaryota	Metazoa			Chordata	Craniata	Actinopterygii	Actinopteri	Neopterygii	Teleostei	Cypriniphysae	Cypriniformes				Cyprinoidea	Cyprinidae				Danio				Danio rerio
GLLNLIWDSK	Eukaryota	Metazoa			Chordata	Craniata	Actinopterygii	Actinopteri	Neopterygii	Teleostei	Cypriniphysae	Cypriniformes				Cyprinoidea	Cyprinidae				Danio				Danio rerio
GPPPSHLDITPQSDATPTSFHLTNGDAVQSQSSAMK	Eukaryota	Metazoa			Chordata	Craniata	Actinopterygii	Actinopteri	Neopterygii	Teleostei	Cypriniphysae	Cypriniformes				Cyprinoidea	Cyprinidae				Danio				Danio rerio
GSSLFEALNLLQDK	Eukaryota	Metazoa			Chordata	Craniata	Actinopterygii	Actinopteri	Neopterygii	Teleostei	Cypriniphysae	Cypriniformes				Cyprinoidea	Cyprinidae				Danio				Danio rerio
GYHETIYDILNDAIFDEDHEELVIVK	Eukaryota	Metazoa			Chordata	Craniata	Actinopterygii	Actinopteri	Neopterygii	Teleostei	Cypriniphysae	Cypriniformes				Cyprinoidea	Cyprinidae				Danio				Danio rerio
GYIFLEYSAPSHAHEAVK	Eukaryota	Metazoa			Chordata	Craniata	Actinopterygii	Actinopteri	Neopterygii	Teleostei	Cypriniphysae	Cypriniformes				Cyprinoidea	Cyprinidae				Danio				Danio rerio
GYIVEVQDEGSHEWK	Eukaryota	Metazoa			Chordata	Craniata	Actinopterygii	Actinopteri	Neopterygii	Teleostei	Cypriniphysae	Cypriniformes				Cyprinoidea	Cyprinidae				Danio				Danio rerio
GYNALQYYENLSELK	Eukaryota	Metazoa			Chordata	Craniata	Actinopterygii	Actinopteri	Neopterygii	Teleostei	Cypriniphysae	Cypriniformes				Cyprinoidea	Cyprinidae				Danio				Danio rerio
HADSVSDLGEQIDNLQR	Eukaryota	Metazoa			Chordata	Craniata	Actinopterygii	Actinopteri	Neopterygii	Teleostei	Cypriniphysae	Cypriniformes				Cyprinoidea	Cyprinidae				Danio				Danio rerio
HAITSSESLSELAQK	Eukaryota	Metazoa			Chordata	Craniata	Actinopterygii	Actinopteri	Neopterygii	Teleostei	Cypriniphysae	Cypriniformes				Cyprinoidea	Cyprinidae				Danio				Danio rerio
HFVISHTSGYSDPAILQR	Eukaryota	Metazoa			Chordata	Craniata	Actinopterygii	Actinopteri	Neopterygii	Teleostei	Cypriniphysae	Cypriniformes				Cyprinoidea	Cyprinidae				Danio				Danio rerio
HGVSLAALK	Eukaryota	Metazoa			Chordata	Craniata	Actinopterygii	Actinopteri	Neopterygii	Teleostei	Cypriniphysae	Cypriniformes				Cyprinoidea	Cyprinidae				Danio				Danio rerio
HIDIEPQNTHILDGNASNLQTECESFEQK	Eukaryota	Metazoa			Chordata	Craniata	Actinopterygii	Actinopteri	Neopterygii	Teleostei	Cypriniphysae	Cypriniformes				Cyprinoidea	Cyprinidae				Danio				Danio rerio
HLFSLSLDAVTK	Eukaryota	Metazoa			Chordata	Craniata	Actinopterygii	Actinopteri	Neopterygii	Teleostei	Cypriniphysae	Cypriniformes				Cyprinoidea	Cyprinidae				Danio				Danio rerio
HLLDPIDELFTAASTIAGITTTGIGDGGNELGMGK	Eukaryota	Metazoa			Chordata	Craniata	Actinopterygii	Actinopteri	Neopterygii	Teleostei	Cypriniphysae	Cypriniformes				Cyprinoidea	Cyprinidae				Danio				Danio rerio
HQALQAEISGHEPR	Eukaryota	Metazoa			Chordata	Craniata	Actinopterygii	Actinopteri	Neopterygii	Teleostei	Cypriniphysae	Cypriniformes				Cyprinoidea	Cyprinidae				Danio				Danio rerio
HQFEAPGHPGKPVASDLSEDALTLGWTMPLFDGGSPISGYIIER	Eukaryota	Metazoa			Chordata	Craniata	Actinopterygii	Actinopteri	Neopterygii	Teleostei	Cypriniphysae	Cypriniformes				Cyprinoidea	Cyprinidae				Danio				Danio rerio
HSDSFLQQVSGTLESHSEQLLQLK	Eukaryota	Metazoa			Chordata	Craniata	Actinopterygii	Actinopteri	Neopterygii	Teleostei	Cypriniphysae	Cypriniformes				Cyprinoidea	Cyprinidae				Danio				Danio rerio
HSIIPSGVVEEINELFVPENR	Eukaryota	Metazoa			Chordata	Craniata	Actinopterygii	Actinopteri	Neopterygii	Teleostei	Cypriniphysae	Cypriniformes				Cyprinoidea	Cyprinidae				Danio				Danio rerio
HVASFAYSHIK	Eukaryota	Metazoa			Chordata	Craniata	Actinopterygii	Actinopteri	Neopterygii	Teleostei	Cypriniphysae	Cypriniformes				Cyprinoidea	Cyprinidae				Danio				Danio rerio
HVGDLGNVTADASGVAK	Eukaryota	Metazoa			Chordata	Craniata	Actinopterygii	Actinopteri	Neopterygii	Teleostei	Cypriniphysae	Cypriniformes				Cyprinoidea	Cyprinidae				Danio				Danio rerio
HYCVVLNPAVR	Eukaryota	Metazoa			Chordata	Craniata	Actinopterygii	Actinopteri	Neopterygii	Teleostei	Cypriniphysae	Cypriniformes				Cyprinoidea	Cyprinidae				Danio				Danio rerio
HYNEFCAFQPQIQSVR	Eukaryota	Metazoa			Chordata	Craniata	Actinopterygii	Actinopteri	Neopterygii	Teleostei	Cypriniphysae	Cypriniformes				Cyprinoidea	Cyprinidae				Danio				Danio rerio
IALLLTDGFFHPR	Eukaryota	Metazoa			Chordata	Craniata	Actinopterygii	Actinopteri	Neopterygii	Teleostei	Cypriniphysae	Cypriniformes				Cyprinoidea	Cyprinidae				Danio				Danio rerio
LDFNLADAINQDFLNTR	Eukaryota	Metazoa			Chordata	Craniata	Actinopterygii	Actinopteri	Neopterygii	Teleostei	Cypriniphysae	Cypriniformes				Cyprinoidea	Cyprinidae				Danio				Danio rerio
LDNNEALLGSYHVDDDCR	Eukaryota	Metazoa			Chordata	Craniata	Actinopterygii	Actinopteri	Neopterygii	Teleostei	Cypriniphysae	Cypriniformes				Cyprinoidea	Cyprinidae				Danio				Danio rerio
LDPNTPDHLIGLLGNDIINVVASDHR	Eukaryota	Metazoa			Chordata	Craniata	Actinopterygii	Actinopteri	Neopterygii	Teleostei	Cypriniphysae	Cypriniformes				Cyprinoidea	Cyprinidae				Danio				Danio rerio
LDTLLAVQELLEDGALELFHR	Eukaryota	Metazoa			Chordata	Craniata	Actinopterygii	Actinopteri	Neopterygii	Teleostei	Cypriniphysae	Cypriniformes				Cyprinoidea	Cyprinidae				Danio				Danio rerio
IDVQSPSCSPTAVVWHPQHSSTIAYGDELGR	Eukaryota	Metazoa			Chordata	Craniata	Actinopterygii	Actinopteri	Neopterygii	Teleostei	Cypriniphysae	Cypriniformes				Cyprinoidea	Cyprinidae				Danio				Danio rerio
LEEAPVSIPNPFSNGHK	Eukaryota	Metazoa			Chordata	Craniata	Actinopterygii	Actinopteri	Neopterygii	Teleostei	Cypriniphysae	Cypriniformes				Cyprinoidea	Cyprinidae				Danio				Danio rerio
LEELSVNDDK	Eukaryota	Metazoa			Chordata	Craniata	Actinopterygii	Actinopteri	Neopterygii	Teleostei	Cypriniphysae	Cypriniformes				Cyprinoidea	Cyprinidae				Danio				Danio rerio
LEPLMDDIR	Eukaryota	Metazoa			Chordata	Craniata	Actinopterygii	Actinopteri	Neopterygii	Teleostei	Cypriniphysae	Cypriniformes				Cyprinoidea	Cyprinidae				Danio				Danio rerio
LESSSGILEVLHCILNESPESLNIIQK	Eukaryota	Metazoa			Chordata	Craniata	Actinopterygii	Actinopteri	Neopterygii	Teleostei	Cypriniphysae	Cypriniformes				Cyprinoidea	Cyprinidae				Danio				Danio rerio
IETELQDICSDVLGLLEK	Eukaryota	Metazoa			Chordata	Craniata	Actinopterygii	Actinopteri	Neopterygii	Teleostei	Cypriniphysae	Cypriniformes				Cyprinoidea	Cyprinidae				Danio				Danio rerio
LEVGNHHWTQCNDTPVK	Eukaryota	Metazoa			Chordata	Craniata	Actinopterygii	Actinopteri	Neopterygii	Teleostei	Cypriniphysae	Cypriniformes				Cyprinoidea	Cyprinidae				Danio				Danio rerio
IFLFDQENFQGR	Eukaryota	Metazoa			Chordata	Craniata	Actinopterygii	Actinopteri	Neopterygii	Teleostei	Cypriniphysae	Cypriniformes				Cyprinoidea	Cyprinidae				Danio				Danio rerio
LFLNAEGAAK	Eukaryota	Metazoa			Chordata	Craniata	Actinopterygii	Actinopteri	Neopterygii	Teleostei	Cypriniphysae	Cypriniformes				Cyprinoidea	Cyprinidae				Danio				Danio rerio
LFQNDGQPISLLFTLWK	Eukaryota	Metazoa			Chordata	Craniata	Actinopterygii	Actinopteri	Neopterygii	Teleostei	Cypriniphysae	Cypriniformes				Cyprinoidea	Cyprinidae				Danio				Danio rerio
LFSEVFQWLPLAQCINDK	Eukaryota	Metazoa			Chordata	Craniata	Actinopterygii	Actinopteri	Neopterygii	Teleostei	Cypriniphysae	Cypriniformes				Cyprinoidea	Cyprinidae				Danio				Danio rerio
LFTLDSVIGLK	Eukaryota	Metazoa			Chordata	Craniata	Actinopterygii	Actinopteri	Neopterygii	Teleostei	Cypriniphysae	Cypriniformes				Cyprinoidea	Cyprinidae				Danio				Danio rerio
LFTWVEWVK	Eukaryota	Metazoa			Chordata	Craniata	Actinopterygii	Actinopteri	Neopterygii	Teleostei	Cypriniphysae	Cypriniformes				Cyprinoidea	Cyprinidae				Danio				Danio rerio
IGAEEFAALVK	Eukaryota	Metazoa			Chordata	Craniata	Actinopterygii	Actinopteri	Neopterygii	Teleostei	Cypriniphysae	Cypriniformes				Cyprinoidea	Cyprinidae				Danio				Danio rerio
IGQITTEQMHTFVQNNFTSAR	Eukaryota	Metazoa			Chordata	Craniata	Actinopterygii	Actinopteri	Neopterygii	Teleostei	Cypriniphysae	Cypriniformes				Cyprinoidea	Cyprinidae				Danio				Danio rerio
IGSVHSGVPEQNPCFTGR	Eukaryota	Metazoa			Chordata	Craniata	Actinopterygii	Actinopteri	Neopterygii	Teleostei	Cypriniphysae	Cypriniformes				Cyprinoidea	Cyprinidae				Danio				Danio rerio
IGTHNGTFHCDEVLACFLLR	Eukaryota	Metazoa			Chordata	Craniata	Actinopterygii	Actinopteri	Neopterygii	Teleostei	Cypriniphysae	Cypriniformes				Cyprinoidea	Cyprinidae				Danio				Danio rerio
IGTVVSVLIDVLTTR	Eukaryota	Metazoa			Chordata	Craniata	Actinopterygii	Actinopteri	Neopterygii	Teleostei	Cypriniphysae	Cypriniformes				Cyprinoidea	Cyprinidae				Danio				Danio rerio
LGVVKPGLTEDALWR	Eukaryota	Metazoa			Chordata	Craniata	Actinopterygii	Actinopteri	Neopterygii	Teleostei	Cypriniphysae	Cypriniformes				Cyprinoidea	Cyprinidae				Danio				Danio rerio
IHELTNTPTQYEAR	Eukaryota	Metazoa			Chordata	Craniata	Actinopterygii	Actinopteri	Neopterygii	Teleostei	Cypriniphysae	Cypriniformes				Cyprinoidea	Cyprinidae				Danio				Danio rerio
IHFLGTSYLQDGPEGNDIR	Eukaryota	Metazoa			Chordata	Craniata	Actinopterygii	Actinopteri	Neopterygii	Teleostei	Cypriniphysae	Cypriniformes				Cyprinoidea	Cyprinidae				Danio				Danio rerio
LLCIPTQLYSQHFQK	Eukaryota	Metazoa			Chordata	Craniata	Actinopterygii	Actinopteri	Neopterygii	Teleostei	Cypriniphysae	Cypriniformes				Cyprinoidea	Cyprinidae				Danio				Danio rerio
LLDGEASSVTTSSSTTR	Eukaryota	Metazoa			Chordata	Craniata	Actinopterygii	Actinopteri	Neopterygii	Teleostei	Cypriniphysae	Cypriniformes				Cyprinoidea	Cyprinidae				Danio				Danio rerio
IIEDISEAVIFGFSIPAIK	Eukaryota	Metazoa			Chordata	Craniata	Actinopterygii	Actinopteri	Neopterygii	Teleostei	Cypriniphysae	Cypriniformes				Cyprinoidea	Cyprinidae				Danio				Danio rerio
ILHATGVNGGIYLSIDNAK	Eukaryota	Metazoa			Chordata	Craniata	Actinopterygii	Actinopteri	Neopterygii	Teleostei	Cypriniphysae	Cypriniformes				Cyprinoidea	Cyprinidae				Danio				Danio rerio
LIHEPSAALLAYDIGQDSPLGK	Eukaryota	Metazoa			Chordata	Craniata	Actinopterygii	Actinopteri	Neopterygii	Teleostei	Cypriniphysae	Cypriniformes				Cyprinoidea	Cyprinidae				Danio				Danio rerio
LLHLYLAHNELEAVPLIPETVR	Eukaryota	Metazoa			Chordata	Craniata	Actinopterygii	Actinopteri	Neopterygii	Teleostei	Cypriniphysae	Cypriniformes				Cyprinoidea	Cyprinidae				Danio				Danio rerio
IIHTAAAPAAIGPYSQAVLVDR	Eukaryota	Metazoa			Chordata	Craniata	Actinopterygii	Actinopteri	Neopterygii	Teleostei	Cypriniphysae	Cypriniformes				Cyprinoidea	Cyprinidae				Danio				Danio rerio
LLPEFPGVPVGLQEDNGVQYLFEVYESIK	Eukaryota	Metazoa			Chordata	Craniata	Actinopterygii	Actinopteri	Neopterygii	Teleostei	Cypriniphysae	Cypriniformes				Cyprinoidea	Cyprinidae				Danio				Danio rerio
ILQMEEEYVQQICEDIIR	Eukaryota	Metazoa			Chordata	Craniata	Actinopterygii	Actinopteri	Neopterygii	Teleostei	Cypriniphysae	Cypriniformes				Cyprinoidea	Cyprinidae				Danio				Danio rerio
ILSESEVDTHLVSLSER	Eukaryota	Metazoa			Chordata	Craniata	Actinopterygii	Actinopteri	Neopterygii	Teleostei	Cypriniphysae	Cypriniformes				Cyprinoidea	Cyprinidae				Danio				Danio rerio
LLSSLGGSSLAHGLLAELR	Eukaryota	Metazoa			Chordata	Craniata	Actinopterygii	Actinopteri	Neopterygii	Teleostei	Cypriniphysae	Cypriniformes				Cyprinoidea	Cyprinidae				Danio				Danio rerio
LISVSNSLYSVTGTEIK	Eukaryota	Metazoa			Chordata	Craniata	Actinopterygii	Actinopteri	Neopterygii	Teleostei	Cypriniphysae	Cypriniformes				Cyprinoidea	Cyprinidae				Danio				Danio rerio
IITITGTQDQIQNAQYLLQNSALHLLGR	Eukaryota	Metazoa			Chordata	Craniata	Actinopterygii	Actinopteri	Neopterygii	Teleostei	Cypriniphysae	Cypriniformes				Cyprinoidea	Cyprinidae				Danio				Danio rerio
LITVQTWLTGR	Eukaryota	Metazoa			Chordata	Craniata	Actinopterygii	Actinopteri	Neopterygii	Teleostei	Cypriniphysae	Cypriniformes				Cyprinoidea	Cyprinidae				Danio				Danio rerio
LLVLEMPLAHK	Eukaryota	Metazoa			Chordata	Craniata	Actinopterygii	Actinopteri	Neopterygii	Teleostei	Cypriniphysae	Cypriniformes				Cyprinoidea	Cyprinidae				Danio				Danio rerio
LLWTILAENVIDCHFVANK	Eukaryota	Metazoa			Chordata	Craniata	Actinopterygii	Actinopteri	Neopterygii	Teleostei	Cypriniphysae	Cypriniformes				Cyprinoidea	Cyprinidae				Danio				Danio rerio
INADIAGRPLPVASWTK	Eukaryota	Metazoa			Chordata	Craniata	Actinopterygii	Actinopteri	Neopterygii	Teleostei	Cypriniphysae	Cypriniformes				Cyprinoidea	Cyprinidae				Danio				Danio rerio
LNENFLVDFGAEPEGPALAHELR	Eukaryota	Metazoa			Chordata	Craniata	Actinopterygii	Actinopteri	Neopterygii	Teleostei	Cypriniphysae	Cypriniformes				Cyprinoidea	Cyprinidae				Danio				Danio rerio
LPIIVTTYAK	Eukaryota	Metazoa			Chordata	Craniata	Actinopterygii	Actinopteri	Neopterygii	Teleostei	Cypriniphysae	Cypriniformes				Cyprinoidea	Cyprinidae				Danio				Danio rerio
IPNLLEEIQNNLFK	Eukaryota	Metazoa			Chordata	Craniata	Actinopterygii	Actinopteri	Neopterygii	Teleostei	Cypriniphysae	Cypriniformes				Cyprinoidea	Cyprinidae				Danio				Danio rerio
LQEVVEELGNK	Eukaryota	Metazoa			Chordata	Craniata	Actinopterygii	Actinopteri	Neopterygii	Teleostei	Cypriniphysae	Cypriniformes				Cyprinoidea	Cyprinidae				Danio				Danio rerio
LQQELDDMLVDQDHLR	Eukaryota	Metazoa			Chordata	Craniata	Actinopterygii	Actinopteri	Neopterygii	Teleostei	Cypriniphysae	Cypriniformes				Cyprinoidea	Cyprinidae				Danio				Danio rerio
ISDATAQIVEVLTHLVANNK	Eukaryota	Metazoa			Chordata	Craniata	Actinopterygii	Actinopteri	Neopterygii	Teleostei	Cypriniphysae	Cypriniformes				Cyprinoidea	Cyprinidae				Danio				Danio rerio
LSFTGQQINEAACDLAR	Eukaryota	Metazoa			Chordata	Craniata	Actinopterygii	Actinopteri	Neopterygii	Teleostei	Cypriniphysae	Cypriniformes				Cyprinoidea	Cyprinidae				Danio				Danio rerio
ISISLPLLLGGK	Eukaryota	Metazoa			Chordata	Craniata	Actinopterygii	Actinopteri	Neopterygii	Teleostei	Cypriniphysae	Cypriniformes				Cyprinoidea	Cyprinidae				Danio				Danio rerio
LSLSTTISTELPLTHLR	Eukaryota	Metazoa			Chordata	Craniata	Actinopterygii	Actinopteri	Neopterygii	Teleostei	Cypriniphysae	Cypriniformes				Cyprinoidea	Cyprinidae				Danio				Danio rerio
LSNLTDLLLCLSSVSFSVM	Eukaryota	Metazoa			Chordata	Craniata	Actinopterygii	Actinopteri	Neopterygii	Teleostei	Cypriniphysae	Cypriniformes				Cyprinoidea	Cyprinidae				Danio				Danio rerio
LSPGEYVIIPSSYEPHQEGEFILR	Eukaryota	Metazoa			Chordata	Craniata	Actinopterygii	Actinopteri	Neopterygii	Teleostei	Cypriniphysae	Cypriniformes				Cyprinoidea	Cyprinidae				Danio				Danio rerio
LSSGTDELK	Eukaryota	Metazoa			Chordata	Craniata	Actinopterygii	Actinopteri	Neopterygii	Teleostei	Cypriniphysae	Cypriniformes				Cyprinoidea	Cyprinidae				Danio				Danio rerio
LSYLEFGQFLQELQLEHAR	Eukaryota	Metazoa			Chordata	Craniata	Actinopterygii	Actinopteri	Neopterygii	Teleostei	Cypriniphysae	Cypriniformes				Cyprinoidea	Cyprinidae				Danio				Danio rerio
ISYLLGSNSAELLK	Eukaryota	Metazoa			Chordata	Craniata	Actinopterygii	Actinopteri	Neopterygii	Teleostei	Cypriniphysae	Cypriniformes				Cyprinoidea	Cyprinidae				Danio				Danio rerio
LTHLNFDQWIVVLK	Eukaryota	Metazoa			Chordata	Craniata	Actinopterygii	Actinopteri	Neopterygii	Teleostei	Cypriniphysae	Cypriniformes				Cyprinoidea	Cyprinidae				Danio				Danio rerio
LTHLNTEQWFVVLK	Eukaryota	Metazoa			Chordata	Craniata	Actinopterygii	Actinopteri	Neopterygii	Teleostei	Cypriniphysae	Cypriniformes				Cyprinoidea	Cyprinidae				Danio				Danio rerio
ITIDTKPGHSTLSIAK	Eukaryota	Metazoa			Chordata	Craniata	Actinopterygii	Actinopteri	Neopterygii	Teleostei	Cypriniphysae	Cypriniformes				Cyprinoidea	Cyprinidae				Danio				Danio rerio
LTWTKPANDGGSDILGYLVECK	Eukaryota	Metazoa			Chordata	Craniata	Actinopterygii	Actinopteri	Neopterygii	Teleostei	Cypriniphysae	Cypriniformes				Cyprinoidea	Cyprinidae				Danio				Danio rerio
IVDITNCQQPASLYR	Eukaryota	Metazoa			Chordata	Craniata	Actinopterygii	Actinopteri	Neopterygii	Teleostei	Cypriniphysae	Cypriniformes				Cyprinoidea	Cyprinidae				Danio				Danio rerio
LVFDHQNDGTTQALGTCLR	Eukaryota	Metazoa			Chordata	Craniata	Actinopterygii	Actinopteri	Neopterygii	Teleostei	Cypriniphysae	Cypriniformes				Cyprinoidea	Cyprinidae				Danio				Danio rerio
LYESELHFIEACLK	Eukaryota	Metazoa			Chordata	Craniata	Actinopterygii	Actinopteri	Neopterygii	Teleostei	Cypriniphysae	Cypriniformes				Cyprinoidea	Cyprinidae				Danio				Danio rerio
MNLPILTANANHQLTADNK	Eukaryota	Metazoa			Chordata	Craniata	Actinopterygii	Actinopteri	Neopterygii	Teleostei	Cypriniphysae	Cypriniformes				Cyprinoidea	Cyprinidae				Danio				Danio rerio
NAVPHFTTAAEMFK	Eukaryota	Metazoa			Chordata	Craniata	Actinopterygii	Actinopteri	Neopterygii	Teleostei	Cypriniphysae	Cypriniformes				Cyprinoidea	Cyprinidae				Danio				Danio rerio
NEFLLTHLK	Eukaryota	Metazoa			Chordata	Craniata	Actinopterygii	Actinopteri	Neopterygii	Teleostei	Cypriniphysae	Cypriniformes				Cyprinoidea	Cyprinidae				Danio				Danio rerio
NFLLEWLSFLCR	Eukaryota	Metazoa			Chordata	Craniata	Actinopterygii	Actinopteri	Neopterygii	Teleostei	Cypriniphysae	Cypriniformes				Cyprinoidea	Cyprinidae				Danio				Danio rerio
NGPIEDAWTTLAPTNELIR	Eukaryota	Metazoa			Chordata	Craniata	Actinopterygii	Actinopteri	Neopterygii	Teleostei	Cypriniphysae	Cypriniformes				Cyprinoidea	Cyprinidae				Danio				Danio rerio
NHDHEVLLTNTFCK	Eukaryota	Metazoa			Chordata	Craniata	Actinopterygii	Actinopteri	Neopterygii	Teleostei	Cypriniphysae	Cypriniformes				Cyprinoidea	Cyprinidae				Danio				Danio rerio
NHTGIYILTVSNSAGSK	Eukaryota	Metazoa			Chordata	Craniata	Actinopterygii	Actinopteri	Neopterygii	Teleostei	Cypriniphysae	Cypriniformes				Cyprinoidea	Cyprinidae				Danio				Danio rerio
NLHFDWFHDDFLFGTSADVYMLQNESPIPTK	Eukaryota	Metazoa			Chordata	Craniata	Actinopterygii	Actinopteri	Neopterygii	Teleostei	Cypriniphysae	Cypriniformes				Cyprinoidea	Cyprinidae				Danio				Danio rerio
NLHHVDADK	Eukaryota	Metazoa			Chordata	Craniata	Actinopterygii	Actinopteri	Neopterygii	Teleostei	Cypriniphysae	Cypriniformes				Cyprinoidea	Cyprinidae				Danio				Danio rerio
NILAILEDLPSLNPPIDHLCELLPR	Eukaryota	Metazoa			Chordata	Craniata	Actinopterygii	Actinopteri	Neopterygii	Teleostei	Cypriniphysae	Cypriniformes				Cyprinoidea	Cyprinidae				Danio				Danio rerio
NLLCHFYVHDLQSR	Eukaryota	Metazoa			Chordata	Craniata	Actinopterygii	Actinopteri	Neopterygii	Teleostei	Cypriniphysae	Cypriniformes				Cyprinoidea	Cyprinidae				Danio				Danio rerio
NLLQNPSPYGVNHTVPPPEPHR	Eukaryota	Metazoa			Chordata	Craniata	Actinopterygii	Actinopteri	Neopterygii	Teleostei	Cypriniphysae	Cypriniformes				Cyprinoidea	Cyprinidae				Danio				Danio rerio
NINAEEVAVGDLVEVK	Eukaryota	Metazoa			Chordata	Craniata	Actinopterygii	Actinopteri	Neopterygii	Teleostei	Cypriniphysae	Cypriniformes				Cyprinoidea	Cyprinidae				Danio				Danio rerio
NPEILAITPILLDALTDPSHR	Eukaryota	Metazoa			Chordata	Craniata	Actinopterygii	Actinopteri	Neopterygii	Teleostei	Cypriniphysae	Cypriniformes				Cyprinoidea	Cyprinidae				Danio				Danio rerio
NPELQSLLLDSFFSK	Eukaryota	Metazoa			Chordata	Craniata	Actinopterygii	Actinopteri	Neopterygii	Teleostei	Cypriniphysae	Cypriniformes				Cyprinoidea	Cyprinidae				Danio				Danio rerio
NPFDPPDAPEKPEIK	Eukaryota	Metazoa			Chordata	Craniata	Actinopterygii	Actinopteri	Neopterygii	Teleostei	Cypriniphysae	Cypriniformes				Cyprinoidea	Cyprinidae				Danio				Danio rerio
NQLWEYNQSGPAIHQELQELGGLK	Eukaryota	Metazoa			Chordata	Craniata	Actinopterygii	Actinopteri	Neopterygii	Teleostei	Cypriniphysae	Cypriniformes				Cyprinoidea	Cyprinidae				Danio				Danio rerio
NSFVVSWKPPLSDGGSK	Eukaryota	Metazoa			Chordata	Craniata	Actinopterygii	Actinopteri	Neopterygii	Teleostei	Cypriniphysae	Cypriniformes				Cyprinoidea	Cyprinidae				Danio				Danio rerio
NSIIGNSQEAYK	Eukaryota	Metazoa			Chordata	Craniata	Actinopterygii	Actinopteri	Neopterygii	Teleostei	Cypriniphysae	Cypriniformes				Cyprinoidea	Cyprinidae				Danio				Danio rerio
NSITIVWTKPEYDGGSK	Eukaryota	Metazoa			Chordata	Craniata	Actinopterygii	Actinopteri	Neopterygii	Teleostei	Cypriniphysae	Cypriniformes				Cyprinoidea	Cyprinidae				Danio				Danio rerio
NSPLVSELSLFDIAHTPGVAADLSHIETR	Eukaryota	Metazoa			Chordata	Craniata	Actinopterygii	Actinopteri	Neopterygii	Teleostei	Cypriniphysae	Cypriniformes				Cyprinoidea	Cyprinidae				Danio				Danio rerio
NSTLFYIIGHHSVR	Eukaryota	Metazoa			Chordata	Craniata	Actinopterygii	Actinopteri	Neopterygii	Teleostei	Cypriniphysae	Cypriniformes				Cyprinoidea	Cyprinidae				Danio				Danio rerio
NVPEASLIGLAK	Eukaryota	Metazoa			Chordata	Craniata	Actinopterygii	Actinopteri	Neopterygii	Teleostei	Cypriniphysae	Cypriniformes				Cyprinoidea	Cyprinidae				Danio				Danio rerio
NYLDLSATNNHFIDEYAR	Eukaryota	Metazoa			Chordata	Craniata	Actinopterygii	Actinopteri	Neopterygii	Teleostei	Cypriniphysae	Cypriniformes				Cyprinoidea	Cyprinidae				Danio				Danio rerio
QDIATDVVLNR	Eukaryota	Metazoa			Chordata	Craniata	Actinopterygii	Actinopteri	Neopterygii	Teleostei	Cypriniphysae	Cypriniformes				Cyprinoidea	Cyprinidae				Danio				Danio rerio
QDYQLVGIIDGYLSLMK	Eukaryota	Metazoa			Chordata	Craniata	Actinopterygii	Actinopteri	Neopterygii	Teleostei	Cypriniphysae	Cypriniformes				Cyprinoidea	Cyprinidae				Danio				Danio rerio
QHPDTVPFTAIDDHPLQLQAK	Eukaryota	Metazoa			Chordata	Craniata	Actinopterygii	Actinopteri	Neopterygii	Teleostei	Cypriniphysae	Cypriniformes				Cyprinoidea	Cyprinidae				Danio				Danio rerio
QIDDILSVASIKPTVLQVESHPYLAQVELLSHCR	Eukaryota	Metazoa			Chordata	Craniata	Actinopterygii	Actinopteri	Neopterygii	Teleostei	Cypriniphysae	Cypriniformes				Cyprinoidea	Cyprinidae				Danio				Danio rerio
QIFEILDEPGHVLVQSK	Eukaryota	Metazoa			Chordata	Craniata	Actinopterygii	Actinopteri	Neopterygii	Teleostei	Cypriniphysae	Cypriniformes				Cyprinoidea	Cyprinidae				Danio				Danio rerio
QIGVQHVVVYINK	Eukaryota	Metazoa			Chordata	Craniata	Actinopterygii	Actinopteri	Neopterygii	Teleostei	Cypriniphysae	Cypriniformes				Cyprinoidea	Cyprinidae				Danio				Danio rerio
QLHLTELVLELAAQVLEEK	Eukaryota	Metazoa			Chordata	Craniata	Actinopterygii	Actinopteri	Neopterygii	Teleostei	Cypriniphysae	Cypriniformes				Cyprinoidea	Cyprinidae				Danio				Danio rerio
QLLATASCSQKPSDPVLNALLAPVSK	Eukaryota	Metazoa			Chordata	Craniata	Actinopterygii	Actinopteri	Neopterygii	Teleostei	Cypriniphysae	Cypriniformes				Cyprinoidea	Cyprinidae				Danio				Danio rerio
QQGHHIGALSIK	Eukaryota	Metazoa			Chordata	Craniata	Actinopterygii	Actinopteri	Neopterygii	Teleostei	Cypriniphysae	Cypriniformes				Cyprinoidea	Cyprinidae				Danio				Danio rerio
QSLILLPFKPELK	Eukaryota	Metazoa			Chordata	Craniata	Actinopterygii	Actinopteri	Neopterygii	Teleostei	Cypriniphysae	Cypriniformes				Cyprinoidea	Cyprinidae				Danio				Danio rerio
QTVAEQVLVGSYCAFSNQGGLVHAK	Eukaryota	Metazoa			Chordata	Craniata	Actinopterygii	Actinopteri	Neopterygii	Teleostei	Cypriniphysae	Cypriniformes				Cyprinoidea	Cyprinidae				Danio				Danio rerio
QTVVNSCGTVGLVHAVANNQDSIDFDNNSALK	Eukaryota	Metazoa			Chordata	Craniata	Actinopterygii	Actinopteri	Neopterygii	Teleostei	Cypriniphysae	Cypriniformes				Cyprinoidea	Cyprinidae				Danio				Danio rerio
SAEISVIVLDKPGPPGAIK	Eukaryota	Metazoa			Chordata	Craniata	Actinopterygii	Actinopteri	Neopterygii	Teleostei	Cypriniphysae	Cypriniformes				Cyprinoidea	Cyprinidae				Danio				Danio rerio
SAILSQAPFTFR	Eukaryota	Metazoa			Chordata	Craniata	Actinopterygii	Actinopteri	Neopterygii	Teleostei	Cypriniphysae	Cypriniformes				Cyprinoidea	Cyprinidae				Danio				Danio rerio
SARPHKPSPSSTHVPR	Eukaryota	Metazoa			Chordata	Craniata	Actinopterygii	Actinopteri	Neopterygii	Teleostei	Cypriniphysae	Cypriniformes				Cyprinoidea	Cyprinidae				Danio				Danio rerio
SEFEALCEDLFDR	Eukaryota	Metazoa			Chordata	Craniata	Actinopterygii	Actinopteri	Neopterygii	Teleostei	Cypriniphysae	Cypriniformes				Cyprinoidea	Cyprinidae				Danio				Danio rerio
SEHTSILQSLTETLR	Eukaryota	Metazoa			Chordata	Craniata	Actinopterygii	Actinopteri	Neopterygii	Teleostei	Cypriniphysae	Cypriniformes				Cyprinoidea	Cyprinidae				Danio				Danio rerio
SELTGHFEELVLAMLK	Eukaryota	Metazoa			Chordata	Craniata	Actinopterygii	Actinopteri	Neopterygii	Teleostei	Cypriniphysae	Cypriniformes				Cyprinoidea	Cyprinidae				Danio				Danio rerio
SFTNIHNDIFYWVLPQNFR	Eukaryota	Metazoa			Chordata	Craniata	Actinopterygii	Actinopteri	Neopterygii	Teleostei	Cypriniphysae	Cypriniformes				Cyprinoidea	Cyprinidae				Danio				Danio rerio
SGHYNLSPSIFFCATPPDDGNLCR	Eukaryota	Metazoa			Chordata	Craniata	Actinopterygii	Actinopteri	Neopterygii	Teleostei	Cypriniphysae	Cypriniformes				Cyprinoidea	Cyprinidae				Danio				Danio rerio
SGVTLPVHFR	Eukaryota	Metazoa			Chordata	Craniata	Actinopterygii	Actinopteri	Neopterygii	Teleostei	Cypriniphysae	Cypriniformes				Cyprinoidea	Cyprinidae				Danio				Danio rerio
SGVYQHMSGSPVGGHAIK	Eukaryota	Metazoa			Chordata	Craniata	Actinopterygii	Actinopteri	Neopterygii	Teleostei	Cypriniphysae	Cypriniformes				Cyprinoidea	Cyprinidae				Danio				Danio rerio
SIESFALDICEHFLTAFNHVTR	Eukaryota	Metazoa			Chordata	Craniata	Actinopterygii	Actinopteri	Neopterygii	Teleostei	Cypriniphysae	Cypriniformes				Cyprinoidea	Cyprinidae				Danio				Danio rerio
SLLLQIAHGLLEEEAAAAEEEK	Eukaryota	Metazoa			Chordata	Craniata	Actinopterygii	Actinopteri	Neopterygii	Teleostei	Cypriniphysae	Cypriniformes				Cyprinoidea	Cyprinidae				Danio				Danio rerio
SLQDDPLLVHYMNVAK	Eukaryota	Metazoa			Chordata	Craniata	Actinopterygii	Actinopteri	Neopterygii	Teleostei	Cypriniphysae	Cypriniformes				Cyprinoidea	Cyprinidae				Danio				Danio rerio
SQESEHYLAFQEAAEQFQPFIK	Eukaryota	Metazoa			Chordata	Craniata	Actinopterygii	Actinopteri	Neopterygii	Teleostei	Cypriniphysae	Cypriniformes				Cyprinoidea	Cyprinidae				Danio				Danio rerio
SSVLQHTIVSLTENEQYLFR	Eukaryota	Metazoa			Chordata	Craniata	Actinopterygii	Actinopteri	Neopterygii	Teleostei	Cypriniphysae	Cypriniformes				Cyprinoidea	Cyprinidae				Danio				Danio rerio
SSVSLSWTKPEYDGGAK	Eukaryota	Metazoa			Chordata	Craniata	Actinopterygii	Actinopteri	Neopterygii	Teleostei	Cypriniphysae	Cypriniformes				Cyprinoidea	Cyprinidae				Danio				Danio rerio
SSVTLTWVKPAHDGGSK	Eukaryota	Metazoa			Chordata	Craniata	Actinopterygii	Actinopteri	Neopterygii	Teleostei	Cypriniphysae	Cypriniformes				Cyprinoidea	Cyprinidae				Danio				Danio rerio
STFPELVLACDVCLCPYTSHGHCGILR	Eukaryota	Metazoa			Chordata	Craniata	Actinopterygii	Actinopteri	Neopterygii	Teleostei	Cypriniphysae	Cypriniformes				Cyprinoidea	Cyprinidae				Danio				Danio rerio
SVFETKPFER	Eukaryota	Metazoa			Chordata	Craniata	Actinopterygii	Actinopteri	Neopterygii	Teleostei	Cypriniphysae	Cypriniformes				Cyprinoidea	Cyprinidae				Danio				Danio rerio
SVFSSILDDLGVGQAPWR	Eukaryota	Metazoa			Chordata	Craniata	Actinopterygii	Actinopteri	Neopterygii	Teleostei	Cypriniphysae	Cypriniformes				Cyprinoidea	Cyprinidae				Danio				Danio rerio
SYADLVWTKPSR	Eukaryota	Metazoa			Chordata	Craniata	Actinopterygii	Actinopteri	Neopterygii	Teleostei	Cypriniphysae	Cypriniformes				Cyprinoidea	Cyprinidae				Danio				Danio rerio
SYFPESWLWEEHLSK	Eukaryota	Metazoa			Chordata	Craniata	Actinopterygii	Actinopteri	Neopterygii	Teleostei	Cypriniphysae	Cypriniformes				Cyprinoidea	Cyprinidae				Danio				Danio rerio
TAADLAVVLFETATLR	Eukaryota	Metazoa			Chordata	Craniata	Actinopterygii	Actinopteri	Neopterygii	Teleostei	Cypriniphysae	Cypriniformes				Cyprinoidea	Cyprinidae				Danio				Danio rerio
TACYVVDDK	Eukaryota	Metazoa			Chordata	Craniata	Actinopterygii	Actinopteri	Neopterygii	Teleostei	Cypriniphysae	Cypriniformes				Cyprinoidea	Cyprinidae				Danio				Danio rerio
TAFQNIEQSELGTK	Eukaryota	Metazoa			Chordata	Craniata	Actinopterygii	Actinopteri	Neopterygii	Teleostei	Cypriniphysae	Cypriniformes				Cyprinoidea	Cyprinidae				Danio				Danio rerio
TCTSIAFTQTNPEDK	Eukaryota	Metazoa			Chordata	Craniata	Actinopterygii	Actinopteri	Neopterygii	Teleostei	Cypriniphysae	Cypriniformes				Cyprinoidea	Cyprinidae				Danio				Danio rerio
TCYLGLPSLPCLHSFPLR	Eukaryota	Metazoa			Chordata	Craniata	Actinopterygii	Actinopteri	Neopterygii	Teleostei	Cypriniphysae	Cypriniformes				Cyprinoidea	Cyprinidae				Danio				Danio rerio
TEPNMHVSSFAYSHIK	Eukaryota	Metazoa			Chordata	Craniata	Actinopterygii	Actinopteri	Neopterygii	Teleostei	Cypriniphysae	Cypriniformes				Cyprinoidea	Cyprinidae				Danio				Danio rerio
TEVWLQWEWPDR	Eukaryota	Metazoa			Chordata	Craniata	Actinopterygii	Actinopteri	Neopterygii	Teleostei	Cypriniphysae	Cypriniformes				Cyprinoidea	Cyprinidae				Danio				Danio rerio
TFEQLHTTIGHQALDDILPALLK	Eukaryota	Metazoa			Chordata	Craniata	Actinopterygii	Actinopteri	Neopterygii	Teleostei	Cypriniphysae	Cypriniformes				Cyprinoidea	Cyprinidae				Danio				Danio rerio
TGLELASIENIWSVYDTLFCEAQHGK	Eukaryota	Metazoa			Chordata	Craniata	Actinopterygii	Actinopteri	Neopterygii	Teleostei	Cypriniphysae	Cypriniformes				Cyprinoidea	Cyprinidae				Danio				Danio rerio
TGLHLNEDILNLMVVR	Eukaryota	Metazoa			Chordata	Craniata	Actinopterygii	Actinopteri	Neopterygii	Teleostei	Cypriniphysae	Cypriniformes				Cyprinoidea	Cyprinidae				Danio				Danio rerio
THHSAAEYNVFEGMELR	Eukaryota	Metazoa			Chordata	Craniata	Actinopterygii	Actinopteri	Neopterygii	Teleostei	Cypriniphysae	Cypriniformes				Cyprinoidea	Cyprinidae				Danio				Danio rerio
TLAMLQEETTVSLHTVDSIDSFISDINNGQWDIVLLAIQYLK	Eukaryota	Metazoa			Chordata	Craniata	Actinopterygii	Actinopteri	Neopterygii	Teleostei	Cypriniphysae	Cypriniformes				Cyprinoidea	Cyprinidae				Danio				Danio rerio
TLGQCGIICIEDLIHEIYTVGK	Eukaryota	Metazoa			Chordata	Craniata	Actinopterygii	Actinopteri	Neopterygii	Teleostei	Cypriniphysae	Cypriniformes				Cyprinoidea	Cyprinidae				Danio				Danio rerio
TIIEEAIPMVAGPKPR	Eukaryota	Metazoa			Chordata	Craniata	Actinopterygii	Actinopteri	Neopterygii	Teleostei	Cypriniphysae	Cypriniformes				Cyprinoidea	Cyprinidae				Danio				Danio rerio
TLITAAELVPAVLEVLPSLR	Eukaryota	Metazoa			Chordata	Craniata	Actinopterygii	Actinopteri	Neopterygii	Teleostei	Cypriniphysae	Cypriniformes				Cyprinoidea	Cyprinidae				Danio				Danio rerio
TLYDHVDEVTCLSFHPTEQILASGSR	Eukaryota	Metazoa			Chordata	Craniata	Actinopterygii	Actinopteri	Neopterygii	Teleostei	Cypriniphysae	Cypriniformes				Cyprinoidea	Cyprinidae				Danio				Danio rerio
TPLHDGGAEVSHYIVER	Eukaryota	Metazoa			Chordata	Craniata	Actinopterygii	Actinopteri	Neopterygii	Teleostei	Cypriniphysae	Cypriniformes				Cyprinoidea	Cyprinidae				Danio				Danio rerio
TQNIYELQEAGAQGVCK	Eukaryota	Metazoa			Chordata	Craniata	Actinopterygii	Actinopteri	Neopterygii	Teleostei	Cypriniphysae	Cypriniformes				Cyprinoidea	Cyprinidae				Danio				Danio rerio
TVDGQQTIIACIEGHK	Eukaryota	Metazoa			Chordata	Craniata	Actinopterygii	Actinopteri	Neopterygii	Teleostei	Cypriniphysae	Cypriniformes				Cyprinoidea	Cyprinidae				Danio				Danio rerio
TVEGIWHTGIVAYGEEFFFGGGGVTSCYPGCTILGMPDSTVDLGNTEVPR	Eukaryota	Metazoa			Chordata	Craniata	Actinopterygii	Actinopteri	Neopterygii	Teleostei	Cypriniphysae	Cypriniformes				Cyprinoidea	Cyprinidae				Danio				Danio rerio
TVVSGLVAYITEEQLQDR	Eukaryota	Metazoa			Chordata	Craniata	Actinopterygii	Actinopteri	Neopterygii	Teleostei	Cypriniphysae	Cypriniformes				Cyprinoidea	Cyprinidae				Danio				Danio rerio
TYLAGAAADVIEFGVR	Eukaryota	Metazoa			Chordata	Craniata	Actinopterygii	Actinopteri	Neopterygii	Teleostei	Cypriniphysae	Cypriniformes				Cyprinoidea	Cyprinidae				Danio				Danio rerio
VAFIAFGPHEGK	Eukaryota	Metazoa			Chordata	Craniata	Actinopterygii	Actinopteri	Neopterygii	Teleostei	Cypriniphysae	Cypriniformes				Cyprinoidea	Cyprinidae				Danio				Danio rerio
VAHDEEEGEEVPTYDSYR	Eukaryota	Metazoa			Chordata	Craniata	Actinopterygii	Actinopteri	Neopterygii	Teleostei	Cypriniphysae	Cypriniformes				Cyprinoidea	Cyprinidae				Danio				Danio rerio
VALEEFLASAVHLLSR	Eukaryota	Metazoa			Chordata	Craniata	Actinopterygii	Actinopteri	Neopterygii	Teleostei	Cypriniphysae	Cypriniformes				Cyprinoidea	Cyprinidae				Danio				Danio rerio
VCLIQGTVEALNNVHDFIAEK	Eukaryota	Metazoa			Chordata	Craniata	Actinopterygii	Actinopteri	Neopterygii	Teleostei	Cypriniphysae	Cypriniformes				Cyprinoidea	Cyprinidae				Danio				Danio rerio
VDALPVELPEHIASASFETYAVVR	Eukaryota	Metazoa			Chordata	Craniata	Actinopterygii	Actinopteri	Neopterygii	Teleostei	Cypriniphysae	Cypriniformes				Cyprinoidea	Cyprinidae				Danio				Danio rerio
VDLSNNPVAIEHIHMK	Eukaryota	Metazoa			Chordata	Craniata	Actinopterygii	Actinopteri	Neopterygii	Teleostei	Cypriniphysae	Cypriniformes				Cyprinoidea	Cyprinidae				Danio				Danio rerio
VEHSSLTLQPVFR	Eukaryota	Metazoa			Chordata	Craniata	Actinopterygii	Actinopteri	Neopterygii	Teleostei	Cypriniphysae	Cypriniformes				Cyprinoidea	Cyprinidae				Danio				Danio rerio
VEYTAYEDGVHLIEVLYDDVPVPK	Eukaryota	Metazoa			Chordata	Craniata	Actinopterygii	Actinopteri	Neopterygii	Teleostei	Cypriniphysae	Cypriniformes				Cyprinoidea	Cyprinidae				Danio				Danio rerio
VFIAVPAGSTGLCIVNDELFVR	Eukaryota	Metazoa			Chordata	Craniata	Actinopterygii	Actinopteri	Neopterygii	Teleostei	Cypriniphysae	Cypriniformes				Cyprinoidea	Cyprinidae				Danio				Danio rerio
VFVSHGGTNGVFEAIYHGVPIVGLPLVFDQDYNLLK	Eukaryota	Metazoa			Chordata	Craniata	Actinopterygii	Actinopteri	Neopterygii	Teleostei	Cypriniphysae	Cypriniformes				Cyprinoidea	Cyprinidae				Danio				Danio rerio
VGAYLPGAHEEVVDIVSAFILTDK	Eukaryota	Metazoa			Chordata	Craniata	Actinopterygii	Actinopteri	Neopterygii	Teleostei	Cypriniphysae	Cypriniformes				Cyprinoidea	Cyprinidae				Danio				Danio rerio
VGDVTHHPVGESTPPAAYTVTDLVEYGIVIEMLSGGK	Eukaryota	Metazoa			Chordata	Craniata	Actinopterygii	Actinopteri	Neopterygii	Teleostei	Cypriniphysae	Cypriniformes				Cyprinoidea	Cyprinidae				Danio				Danio rerio
VHGALAQSVVLPCR	Eukaryota	Metazoa			Chordata	Craniata	Actinopterygii	Actinopteri	Neopterygii	Teleostei	Cypriniphysae	Cypriniformes				Cyprinoidea	Cyprinidae				Danio				Danio rerio
VLAENEHGVGLPADIADPLK	Eukaryota	Metazoa			Chordata	Craniata	Actinopterygii	Actinopteri	Neopterygii	Teleostei	Cypriniphysae	Cypriniformes				Cyprinoidea	Cyprinidae				Danio				Danio rerio
VLGFCHLFLSPSQFPR	Eukaryota	Metazoa			Chordata	Craniata	Actinopterygii	Actinopteri	Neopterygii	Teleostei	Cypriniphysae	Cypriniformes				Cyprinoidea	Cyprinidae				Danio				Danio rerio
VNGRPLEMIEPVTLQYK	Eukaryota	Metazoa			Chordata	Craniata	Actinopterygii	Actinopteri	Neopterygii	Teleostei	Cypriniphysae	Cypriniformes				Cyprinoidea	Cyprinidae				Danio				Danio rerio
VSADLETIQMTASLAMHEK	Eukaryota	Metazoa			Chordata	Craniata	Actinopterygii	Actinopteri	Neopterygii	Teleostei	Cypriniphysae	Cypriniformes				Cyprinoidea	Cyprinidae				Danio				Danio rerio
VSDTPVEFIVEHLLK	Eukaryota	Metazoa			Chordata	Craniata	Actinopterygii	Actinopteri	Neopterygii	Teleostei	Cypriniphysae	Cypriniformes				Cyprinoidea	Cyprinidae				Danio				Danio rerio
VSYGEHHWHAEPQCFQCAGCSK	Eukaryota	Metazoa			Chordata	Craniata	Actinopterygii	Actinopteri	Neopterygii	Teleostei	Cypriniphysae	Cypriniformes				Cyprinoidea	Cyprinidae				Danio				Danio rerio
VTIPIFNMR	Eukaryota	Metazoa			Chordata	Craniata	Actinopterygii	Actinopteri	Neopterygii	Teleostei	Cypriniphysae	Cypriniformes				Cyprinoidea	Cyprinidae				Danio				Danio rerio
WTPFDFLSGLVK	Eukaryota	Metazoa			Chordata	Craniata	Actinopterygii	Actinopteri	Neopterygii	Teleostei	Cypriniphysae	Cypriniformes				Cyprinoidea	Cyprinidae				Danio				Danio rerio
WVIDGEEIK	Eukaryota	Metazoa			Chordata	Craniata	Actinopterygii	Actinopteri	Neopterygii	Teleostei	Cypriniphysae	Cypriniformes				Cyprinoidea	Cyprinidae				Danio				Danio rerio
YALDNHFQTSSGSR	Eukaryota	Metazoa			Chordata	Craniata	Actinopterygii	Actinopteri	Neopterygii	Teleostei	Cypriniphysae	Cypriniformes				Cyprinoidea	Cyprinidae				Danio				Danio rerio
YDLSSILAAAECTLHIASK	Eukaryota	Metazoa			Chordata	Craniata	Actinopterygii	Actinopteri	Neopterygii	Teleostei	Cypriniphysae	Cypriniformes				Cyprinoidea	Cyprinidae				Danio				Danio rerio
YEGLVQVGR	Eukaryota	Metazoa			Chordata	Craniata	Actinopterygii	Actinopteri	Neopterygii	Teleostei	Cypriniphysae	Cypriniformes				Cyprinoidea	Cyprinidae				Danio				Danio rerio
YEPFSFPDDLGSNNSGYYELQAVLTHQGR	Eukaryota	Metazoa			Chordata	Craniata	Actinopterygii	Actinopteri	Neopterygii	Teleostei	Cypriniphysae	Cypriniformes				Cyprinoidea	Cyprinidae				Danio				Danio rerio
YFQETEAPRPADFLSK	Eukaryota	Metazoa			Chordata	Craniata	Actinopterygii	Actinopteri	Neopterygii	Teleostei	Cypriniphysae	Cypriniformes				Cyprinoidea	Cyprinidae				Danio				Danio rerio
YGAVWTGDNAADWGHLK	Eukaryota	Metazoa			Chordata	Craniata	Actinopterygii	Actinopteri	Neopterygii	Teleostei	Cypriniphysae	Cypriniformes				Cyprinoidea	Cyprinidae				Danio				Danio rerio
YGCLSDVQVSCVVSGPCAAHSLIITTEGK	Eukaryota	Metazoa			Chordata	Craniata	Actinopterygii	Actinopteri	Neopterygii	Teleostei	Cypriniphysae	Cypriniformes				Cyprinoidea	Cyprinidae				Danio				Danio rerio
YGIICLEDLIHEIYSAGK	Eukaryota	Metazoa			Chordata	Craniata	Actinopterygii	Actinopteri	Neopterygii	Teleostei	Cypriniphysae	Cypriniformes				Cyprinoidea	Cyprinidae				Danio				Danio rerio
YNHLQPGDHLTDVVLNLSGR	Eukaryota	Metazoa			Chordata	Craniata	Actinopterygii	Actinopteri	Neopterygii	Teleostei	Cypriniphysae	Cypriniformes				Cyprinoidea	Cyprinidae				Danio				Danio rerio
YSDSTLVHINTVIK	Eukaryota	Metazoa			Chordata	Craniata	Actinopterygii	Actinopteri	Neopterygii	Teleostei	Cypriniphysae	Cypriniformes				Cyprinoidea	Cyprinidae				Danio				Danio rerio
YSSFDETGFPTHDAEGK	Eukaryota	Metazoa			Chordata	Craniata	Actinopterygii	Actinopteri	Neopterygii	Teleostei	Cypriniphysae	Cypriniformes				Cyprinoidea	Cyprinidae				Danio				Danio rerio
YSSILNHIPSQPVSIR	Eukaryota	Metazoa			Chordata	Craniata	Actinopterygii	Actinopteri	Neopterygii	Teleostei	Cypriniphysae	Cypriniformes				Cyprinoidea	Cyprinidae				Danio				Danio rerio
YTSSGPLLAMVWEGLNVIK	Eukaryota	Metazoa			Chordata	Craniata	Actinopterygii	Actinopteri	Neopterygii	Teleostei	Cypriniphysae	Cypriniformes				Cyprinoidea	Cyprinidae				Danio				Danio rerio
AAGFPLTDQLFQMIIR	Eukaryota	Metazoa			Chordata	Craniata	Actinopterygii	Actinopteri	Neopterygii	Teleostei	Cypriniphysae	Cypriniformes				Cyprinoidea	Cyprinidae				Danio				Danio rerio
ACNELGITLVHTNIR	Eukaryota	Metazoa			Chordata	Craniata	Actinopterygii	Actinopteri	Neopterygii	Teleostei	Cypriniphysae	Cypriniformes				Cyprinoidea	Cyprinidae				Danio				Danio rerio
AFHMDYYYTPLMIGAAGSAYMINDAATILPR	Eukaryota	Metazoa			Chordata	Craniata	Actinopterygii	Actinopteri	Neopterygii	Teleostei	Cypriniphysae	Cypriniformes				Cyprinoidea	Cyprinidae				Danio				Danio rerio
AFQLDFYHTPLMIGAAGSAYMINDAATILPR	Eukaryota	Metazoa			Chordata	Craniata	Actinopterygii	Actinopteri	Neopterygii	Teleostei	Cypriniphysae	Cypriniformes				Cyprinoidea	Cyprinidae				Danio				Danio rerio
AFVHQSLAVMHLPAEIGDYTDFYSSR	Eukaryota	Metazoa			Chordata	Craniata	Actinopterygii	Actinopteri	Neopterygii	Teleostei	Cypriniphysae	Cypriniformes				Cyprinoidea	Cyprinidae				Danio				Danio rerio
AGQIINLVTR	Eukaryota	Metazoa			Chordata	Craniata	Actinopterygii	Actinopteri	Neopterygii	Teleostei	Cypriniphysae	Cypriniformes				Cyprinoidea	Cyprinidae				Danio				Danio rerio
ALESYFALESPLYFSSSNLVCR	Eukaryota	Metazoa			Chordata	Craniata	Actinopterygii	Actinopteri	Neopterygii	Teleostei	Cypriniphysae	Cypriniformes				Cyprinoidea	Cyprinidae				Danio				Danio rerio
ALFDLLVPLR	Eukaryota	Metazoa			Chordata	Craniata	Actinopterygii	Actinopteri	Neopterygii	Teleostei	Cypriniphysae	Cypriniformes				Cyprinoidea	Cyprinidae				Danio				Danio rerio
ALPTDKPLASAYVK	Eukaryota	Metazoa			Chordata	Craniata	Actinopterygii	Actinopteri	Neopterygii	Teleostei	Cypriniphysae	Cypriniformes				Cyprinoidea	Cyprinidae				Danio				Danio rerio
ALPTDRPLASAYVK	Eukaryota	Metazoa			Chordata	Craniata	Actinopterygii	Actinopteri	Neopterygii	Teleostei	Cypriniphysae	Cypriniformes				Cyprinoidea	Cyprinidae				Danio				Danio rerio
ANNVDAIHPGYGFLSER	Eukaryota	Metazoa			Chordata	Craniata	Actinopterygii	Actinopteri	Neopterygii	Teleostei	Cypriniphysae	Cypriniformes				Cyprinoidea	Cyprinidae				Danio				Danio rerio
ANSDDGTYVHDFSLQLQPYSTSLK	Eukaryota	Metazoa			Chordata	Craniata	Actinopterygii	Actinopteri	Neopterygii	Teleostei	Cypriniphysae	Cypriniformes				Cyprinoidea	Cyprinidae				Danio				Danio rerio
ASHSVQDIVLNLFVQK	Eukaryota	Metazoa			Chordata	Craniata	Actinopterygii	Actinopteri	Neopterygii	Teleostei	Cypriniphysae	Cypriniformes				Cyprinoidea	Cyprinidae				Danio				Danio rerio
AVDLVLNNAQLIPVLGNLR	Eukaryota	Metazoa			Chordata	Craniata	Actinopterygii	Actinopteri	Neopterygii	Teleostei	Cypriniphysae	Cypriniformes				Cyprinoidea	Cyprinidae				Danio				Danio rerio
AVMFCLSDDK	Eukaryota	Metazoa			Chordata	Craniata	Actinopterygii	Actinopteri	Neopterygii	Teleostei	Cypriniphysae	Cypriniformes				Cyprinoidea	Cyprinidae				Danio				Danio rerio
AVVPNVYLDDDTIYHLQPSGR	Eukaryota	Metazoa			Chordata	Craniata	Actinopterygii	Actinopteri	Neopterygii	Teleostei	Cypriniphysae	Cypriniformes				Cyprinoidea	Cyprinidae				Danio				Danio rerio
AYLAGAAADVIEFGVR	Eukaryota	Metazoa			Chordata	Craniata	Actinopterygii	Actinopteri	Neopterygii	Teleostei	Cypriniphysae	Cypriniformes				Cyprinoidea	Cyprinidae				Danio				Danio rerio
CEAFGFNTYVVDGHDVEELCK	Eukaryota	Metazoa			Chordata	Craniata	Actinopterygii	Actinopteri	Neopterygii	Teleostei	Cypriniphysae	Cypriniformes				Cyprinoidea	Cyprinidae				Danio				Danio rerio
CEDLAALLYLNESSVMHSLR	Eukaryota	Metazoa			Chordata	Craniata	Actinopterygii	Actinopteri	Neopterygii	Teleostei	Cypriniphysae	Cypriniformes				Cyprinoidea	Cyprinidae				Danio				Danio rerio
CFLDHFESLEK	Eukaryota	Metazoa			Chordata	Craniata	Actinopterygii	Actinopteri	Neopterygii	Teleostei	Cypriniphysae	Cypriniformes				Cyprinoidea	Cyprinidae				Danio				Danio rerio
DAPAQIVEVLK	Eukaryota	Metazoa			Chordata	Craniata	Actinopterygii	Actinopteri	Neopterygii	Teleostei	Cypriniphysae	Cypriniformes				Cyprinoidea	Cyprinidae				Danio				Danio rerio
DAVDAIVEGFGFK	Eukaryota	Metazoa			Chordata	Craniata	Actinopterygii	Actinopteri	Neopterygii	Teleostei	Cypriniphysae	Cypriniformes				Cyprinoidea	Cyprinidae				Danio				Danio rerio
DEDVAAALK	Eukaryota	Metazoa			Chordata	Craniata	Actinopterygii	Actinopteri	Neopterygii	Teleostei	Cypriniphysae	Cypriniformes				Cyprinoidea	Cyprinidae				Danio				Danio rerio
DGNGYIDEHELDALLR	Eukaryota	Metazoa			Chordata	Craniata	Actinopterygii	Actinopteri	Neopterygii	Teleostei	Cypriniphysae	Cypriniformes				Cyprinoidea	Cyprinidae				Danio				Danio rerio
DHIDTVMEYLINVTTAPEFR	Eukaryota	Metazoa			Chordata	Craniata	Actinopterygii	Actinopteri	Neopterygii	Teleostei	Cypriniphysae	Cypriniformes				Cyprinoidea	Cyprinidae				Danio				Danio rerio
DICDFTNATKPASIQESLQTLVEVLSR	Eukaryota	Metazoa			Chordata	Craniata	Actinopterygii	Actinopteri	Neopterygii	Teleostei	Cypriniphysae	Cypriniformes				Cyprinoidea	Cyprinidae				Danio				Danio rerio
DLGDVSTLADSSVIEHLFENR	Eukaryota	Metazoa			Chordata	Craniata	Actinopterygii	Actinopteri	Neopterygii	Teleostei	Cypriniphysae	Cypriniformes				Cyprinoidea	Cyprinidae				Danio				Danio rerio
DLLNFHILK	Eukaryota	Metazoa			Chordata	Craniata	Actinopterygii	Actinopteri	Neopterygii	Teleostei	Cypriniphysae	Cypriniformes				Cyprinoidea	Cyprinidae				Danio				Danio rerio
DLLTAAVHTILDLHR	Eukaryota	Metazoa			Chordata	Craniata	Actinopterygii	Actinopteri	Neopterygii	Teleostei	Cypriniphysae	Cypriniformes				Cyprinoidea	Cyprinidae				Danio				Danio rerio
DLNLQIEALTEELAYMK	Eukaryota	Metazoa			Chordata	Craniata	Actinopterygii	Actinopteri	Neopterygii	Teleostei	Cypriniphysae	Cypriniformes				Cyprinoidea	Cyprinidae				Danio				Danio rerio
DLQTAFYELCWHAIQGSLK	Eukaryota	Metazoa			Chordata	Craniata	Actinopterygii	Actinopteri	Neopterygii	Teleostei	Cypriniphysae	Cypriniformes				Cyprinoidea	Cyprinidae				Danio				Danio rerio
DLSGWCVEQILQHIQR	Eukaryota	Metazoa			Chordata	Craniata	Actinopterygii	Actinopteri	Neopterygii	Teleostei	Cypriniphysae	Cypriniformes				Cyprinoidea	Cyprinidae				Danio				Danio rerio
DIYLPVAVPINPDGTFSIETYEDFLAWIQK	Eukaryota	Metazoa			Chordata	Craniata	Actinopterygii	Actinopteri	Neopterygii	Teleostei	Cypriniphysae	Cypriniformes				Cyprinoidea	Cyprinidae				Danio				Danio rerio
DIYLPVTVPINPDGTFTIDK	Eukaryota	Metazoa			Chordata	Craniata	Actinopterygii	Actinopteri	Neopterygii	Teleostei	Cypriniphysae	Cypriniformes				Cyprinoidea	Cyprinidae				Danio				Danio rerio
DPVTHSQLSEFGEYVAEILPK	Eukaryota	Metazoa			Chordata	Craniata	Actinopterygii	Actinopteri	Neopterygii	Teleostei	Cypriniphysae	Cypriniformes				Cyprinoidea	Cyprinidae				Danio				Danio rerio
DQHDTFFISDPALAHEFPR	Eukaryota	Metazoa			Chordata	Craniata	Actinopterygii	Actinopteri	Neopterygii	Teleostei	Cypriniphysae	Cypriniformes				Cyprinoidea	Cyprinidae				Danio				Danio rerio
DWILPADYDHAEAEAK	Eukaryota	Metazoa			Chordata	Craniata	Actinopterygii	Actinopteri	Neopterygii	Teleostei	Cypriniphysae	Cypriniformes				Cyprinoidea	Cyprinidae				Danio				Danio rerio
DYAFVHFNDR	Eukaryota	Metazoa			Chordata	Craniata	Actinopterygii	Actinopteri	Neopterygii	Teleostei	Cypriniphysae	Cypriniformes				Cyprinoidea	Cyprinidae				Danio				Danio rerio
DYQDPLK	Eukaryota	Metazoa			Chordata	Craniata	Actinopterygii	Actinopteri	Neopterygii	Teleostei	Cypriniphysae	Cypriniformes				Cyprinoidea	Cyprinidae				Danio				Danio rerio
DYVDHVDVVDAVEGAVK	Eukaryota	Metazoa			Chordata	Craniata	Actinopterygii	Actinopteri	Neopterygii	Teleostei	Cypriniphysae	Cypriniformes				Cyprinoidea	Cyprinidae				Danio				Danio rerio
EAFDDAIGHLDNLNEDSYK	Eukaryota	Metazoa			Chordata	Craniata	Actinopterygii	Actinopteri	Neopterygii	Teleostei	Cypriniphysae	Cypriniformes				Cyprinoidea	Cyprinidae				Danio				Danio rerio
EEEAIQLDGLNTSQLK	Eukaryota	Metazoa			Chordata	Craniata	Actinopterygii	Actinopteri	Neopterygii	Teleostei	Cypriniphysae	Cypriniformes				Cyprinoidea	Cyprinidae				Danio				Danio rerio
EGESEWHPANTDLVER	Eukaryota	Metazoa			Chordata	Craniata	Actinopterygii	Actinopteri	Neopterygii	Teleostei	Cypriniphysae	Cypriniformes				Cyprinoidea	Cyprinidae				Danio				Danio rerio
EHISEFTSEANK	Eukaryota	Metazoa			Chordata	Craniata	Actinopterygii	Actinopteri	Neopterygii	Teleostei	Cypriniphysae	Cypriniformes				Cyprinoidea	Cyprinidae				Danio				Danio rerio
ELEAMTDLK	Eukaryota	Metazoa			Chordata	Craniata	Actinopterygii	Actinopteri	Neopterygii	Teleostei	Cypriniphysae	Cypriniformes				Cyprinoidea	Cyprinidae				Danio				Danio rerio
ELLSAELGDIFGK	Eukaryota	Metazoa			Chordata	Craniata	Actinopterygii	Actinopteri	Neopterygii	Teleostei	Cypriniphysae	Cypriniformes				Cyprinoidea	Cyprinidae				Danio				Danio rerio
ESDHIHIIALAQALNVPVLVEYMDR	Eukaryota	Metazoa			Chordata	Craniata	Actinopterygii	Actinopteri	Neopterygii	Teleostei	Cypriniphysae	Cypriniformes				Cyprinoidea	Cyprinidae				Danio				Danio rerio
ESDLLTAFFNVDYLR	Eukaryota	Metazoa			Chordata	Craniata	Actinopterygii	Actinopteri	Neopterygii	Teleostei	Cypriniphysae	Cypriniformes				Cyprinoidea	Cyprinidae				Danio				Danio rerio
ESHMSENCPALDLPGSVQELQDLCK	Eukaryota	Metazoa			Chordata	Craniata	Actinopterygii	Actinopteri	Neopterygii	Teleostei	Cypriniphysae	Cypriniformes				Cyprinoidea	Cyprinidae				Danio				Danio rerio
EVDLEQYFQNPLPLHCTTK	Eukaryota	Metazoa			Chordata	Craniata	Actinopterygii	Actinopteri	Neopterygii	Teleostei	Cypriniphysae	Cypriniformes				Cyprinoidea	Cyprinidae				Danio				Danio rerio
EVLQSENPTQHPAYWDVVTSLVLQGR	Eukaryota	Metazoa			Chordata	Craniata	Actinopterygii	Actinopteri	Neopterygii	Teleostei	Cypriniphysae	Cypriniformes				Cyprinoidea	Cyprinidae				Danio				Danio rerio
EVVVIHQDPEALTDIQSLQNYILEELNVR	Eukaryota	Metazoa			Chordata	Craniata	Actinopterygii	Actinopteri	Neopterygii	Teleostei	Cypriniphysae	Cypriniformes				Cyprinoidea	Cyprinidae				Danio				Danio rerio
FCADGVLLSK	Eukaryota	Metazoa			Chordata	Craniata	Actinopterygii	Actinopteri	Neopterygii	Teleostei	Cypriniphysae	Cypriniformes				Cyprinoidea	Cyprinidae				Danio				Danio rerio
FEHMEK	Eukaryota	Metazoa			Chordata	Craniata	Actinopterygii	Actinopteri	Neopterygii	Teleostei	Cypriniphysae	Cypriniformes				Cyprinoidea	Cyprinidae				Danio				Danio rerio
FEMEGFNSLLGSHNDK	Eukaryota	Metazoa			Chordata	Craniata	Actinopterygii	Actinopteri	Neopterygii	Teleostei	Cypriniphysae	Cypriniformes				Cyprinoidea	Cyprinidae				Danio				Danio rerio
FIQDNIFGICAHMTEDNK	Eukaryota	Metazoa			Chordata	Craniata	Actinopterygii	Actinopteri	Neopterygii	Teleostei	Cypriniphysae	Cypriniformes				Cyprinoidea	Cyprinidae				Danio				Danio rerio
FIQEVEFHLLK	Eukaryota	Metazoa			Chordata	Craniata	Actinopterygii	Actinopteri	Neopterygii	Teleostei	Cypriniphysae	Cypriniformes				Cyprinoidea	Cyprinidae				Danio				Danio rerio
FNDEHIPDSPFVVPVASPSDDAR	Eukaryota	Metazoa			Chordata	Craniata	Actinopterygii	Actinopteri	Neopterygii	Teleostei	Cypriniphysae	Cypriniformes				Cyprinoidea	Cyprinidae				Danio				Danio rerio
FSDIVDSVVFIDTEALIEDLR	Eukaryota	Metazoa			Chordata	Craniata	Actinopterygii	Actinopteri	Neopterygii	Teleostei	Cypriniphysae	Cypriniformes				Cyprinoidea	Cyprinidae				Danio				Danio rerio
GEFDESLPSPR	Eukaryota	Metazoa			Chordata	Craniata	Actinopterygii	Actinopteri	Neopterygii	Teleostei	Cypriniphysae	Cypriniformes				Cyprinoidea	Cyprinidae				Danio				Danio rerio
GESQTDIEIAR	Eukaryota	Metazoa			Chordata	Craniata	Actinopterygii	Actinopteri	Neopterygii	Teleostei	Cypriniphysae	Cypriniformes				Cyprinoidea	Cyprinidae				Danio				Danio rerio
GIAGLGDVAEIK	Eukaryota	Metazoa			Chordata	Craniata	Actinopterygii	Actinopteri	Neopterygii	Teleostei	Cypriniphysae	Cypriniformes				Cyprinoidea	Cyprinidae				Danio				Danio rerio
GICNVIWETDELVAHLQSNPWTPGATVLTR	Eukaryota	Metazoa			Chordata	Craniata	Actinopterygii	Actinopteri	Neopterygii	Teleostei	Cypriniphysae	Cypriniformes				Cyprinoidea	Cyprinidae				Danio				Danio rerio
GLDTVVHLLSDAVLQPR	Eukaryota	Metazoa			Chordata	Craniata	Actinopterygii	Actinopteri	Neopterygii	Teleostei	Cypriniphysae	Cypriniformes				Cyprinoidea	Cyprinidae				Danio				Danio rerio
GIESLSVEALGALDGDLK	Eukaryota	Metazoa			Chordata	Craniata	Actinopterygii	Actinopteri	Neopterygii	Teleostei	Cypriniphysae	Cypriniformes				Cyprinoidea	Cyprinidae				Danio				Danio rerio
GLHTAIDASQSTDLVFASILAAFSAATCK	Eukaryota	Metazoa			Chordata	Craniata	Actinopterygii	Actinopteri	Neopterygii	Teleostei	Cypriniphysae	Cypriniformes				Cyprinoidea	Cyprinidae				Danio				Danio rerio
GMLALATDTPDFLR	Eukaryota	Metazoa			Chordata	Craniata	Actinopterygii	Actinopteri	Neopterygii	Teleostei	Cypriniphysae	Cypriniformes				Cyprinoidea	Cyprinidae				Danio				Danio rerio
GQYFSFLEEYGTHFTK	Eukaryota	Metazoa			Chordata	Craniata	Actinopterygii	Actinopteri	Neopterygii	Teleostei	Cypriniphysae	Cypriniformes				Cyprinoidea	Cyprinidae				Danio				Danio rerio
GRPEAHFALVHYAGTVDYNISNWLVK	Eukaryota	Metazoa			Chordata	Craniata	Actinopterygii	Actinopteri	Neopterygii	Teleostei	Cypriniphysae	Cypriniformes				Cyprinoidea	Cyprinidae				Danio				Danio rerio
HAVEADISGLR	Eukaryota	Metazoa			Chordata	Craniata	Actinopterygii	Actinopteri	Neopterygii	Teleostei	Cypriniphysae	Cypriniformes				Cyprinoidea	Cyprinidae				Danio				Danio rerio
HCEDINECLLGPHHCVTGER	Eukaryota	Metazoa			Chordata	Craniata	Actinopterygii	Actinopteri	Neopterygii	Teleostei	Cypriniphysae	Cypriniformes				Cyprinoidea	Cyprinidae				Danio				Danio rerio
HCIAVPTCPAELLRPIHEIATEAVSK	Eukaryota	Metazoa			Chordata	Craniata	Actinopterygii	Actinopteri	Neopterygii	Teleostei	Cypriniphysae	Cypriniformes				Cyprinoidea	Cyprinidae				Danio				Danio rerio
HGAETIDSPVFELK	Eukaryota	Metazoa			Chordata	Craniata	Actinopterygii	Actinopteri	Neopterygii	Teleostei	Cypriniphysae	Cypriniformes				Cyprinoidea	Cyprinidae				Danio				Danio rerio
HGAQQLCGILGVSPSELSEGGEDGGFWDALGGK	Eukaryota	Metazoa			Chordata	Craniata	Actinopterygii	Actinopteri	Neopterygii	Teleostei	Cypriniphysae	Cypriniformes				Cyprinoidea	Cyprinidae				Danio				Danio rerio
HGTGEAFINLDVIDVPGPVK	Eukaryota	Metazoa			Chordata	Craniata	Actinopterygii	Actinopteri	Neopterygii	Teleostei	Cypriniphysae	Cypriniformes				Cyprinoidea	Cyprinidae				Danio				Danio rerio
HLFIPFSHEGQYGISSEVK	Eukaryota	Metazoa			Chordata	Craniata	Actinopterygii	Actinopteri	Neopterygii	Teleostei	Cypriniphysae	Cypriniformes				Cyprinoidea	Cyprinidae				Danio				Danio rerio
HLLGGEVDHSHTTGSSTAHDHTK	Eukaryota	Metazoa			Chordata	Craniata	Actinopterygii	Actinopteri	Neopterygii	Teleostei	Cypriniphysae	Cypriniformes				Cyprinoidea	Cyprinidae				Danio				Danio rerio
HILGLNIAEYMR	Eukaryota	Metazoa			Chordata	Craniata	Actinopterygii	Actinopteri	Neopterygii	Teleostei	Cypriniphysae	Cypriniformes				Cyprinoidea	Cyprinidae				Danio				Danio rerio
HIIMEQGQEILQGDEGDPYLK	Eukaryota	Metazoa			Chordata	Craniata	Actinopterygii	Actinopteri	Neopterygii	Teleostei	Cypriniphysae	Cypriniformes				Cyprinoidea	Cyprinidae				Danio				Danio rerio
HLNVFGNDYSTPDGTGVR	Eukaryota	Metazoa			Chordata	Craniata	Actinopterygii	Actinopteri	Neopterygii	Teleostei	Cypriniphysae	Cypriniformes				Cyprinoidea	Cyprinidae				Danio				Danio rerio
HLSAEISQPIIFEFFK	Eukaryota	Metazoa			Chordata	Craniata	Actinopterygii	Actinopteri	Neopterygii	Teleostei	Cypriniphysae	Cypriniformes				Cyprinoidea	Cyprinidae				Danio				Danio rerio
HLSAEISQPIIFEYSK	Eukaryota	Metazoa			Chordata	Craniata	Actinopterygii	Actinopteri	Neopterygii	Teleostei	Cypriniphysae	Cypriniformes				Cyprinoidea	Cyprinidae				Danio				Danio rerio
HTLVLSQQQLQR	Eukaryota	Metazoa			Chordata	Craniata	Actinopterygii	Actinopteri	Neopterygii	Teleostei	Cypriniphysae	Cypriniformes				Cyprinoidea	Cyprinidae				Danio				Danio rerio
HVTAQSAPLPLTAAEEELR	Eukaryota	Metazoa			Chordata	Craniata	Actinopterygii	Actinopteri	Neopterygii	Teleostei	Cypriniphysae	Cypriniformes				Cyprinoidea	Cyprinidae				Danio				Danio rerio
HWNEYDQNK	Eukaryota	Metazoa			Chordata	Craniata	Actinopterygii	Actinopteri	Neopterygii	Teleostei	Cypriniphysae	Cypriniformes				Cyprinoidea	Cyprinidae				Danio				Danio rerio
HYDCTGDCGDFSSYMSR	Eukaryota	Metazoa			Chordata	Craniata	Actinopterygii	Actinopteri	Neopterygii	Teleostei	Cypriniphysae	Cypriniformes				Cyprinoidea	Cyprinidae				Danio				Danio rerio
KPPTFTDASIIATELLNSGYEFDQGSIVYNR	Eukaryota	Metazoa			Chordata	Craniata	Actinopterygii	Actinopteri	Neopterygii	Teleostei	Cypriniphysae	Cypriniformes				Cyprinoidea	Cyprinidae				Danio				Danio rerio
LAEGEFIQGILENEDAIHLIQFEHQK	Eukaryota	Metazoa			Chordata	Craniata	Actinopterygii	Actinopteri	Neopterygii	Teleostei	Cypriniphysae	Cypriniformes				Cyprinoidea	Cyprinidae				Danio				Danio rerio
IAHGWQIEEADDWLR	Eukaryota	Metazoa			Chordata	Craniata	Actinopterygii	Actinopteri	Neopterygii	Teleostei	Cypriniphysae	Cypriniformes				Cyprinoidea	Cyprinidae				Danio				Danio rerio
IALFCHQLNICSK	Eukaryota	Metazoa			Chordata	Craniata	Actinopterygii	Actinopteri	Neopterygii	Teleostei	Cypriniphysae	Cypriniformes				Cyprinoidea	Cyprinidae				Danio				Danio rerio
ICNPSDTECLQYHLR	Eukaryota	Metazoa			Chordata	Craniata	Actinopterygii	Actinopteri	Neopterygii	Teleostei	Cypriniphysae	Cypriniformes				Cyprinoidea	Cyprinidae				Danio				Danio rerio
LDALTATAVQDPEGFLGHPVNAFK	Eukaryota	Metazoa			Chordata	Craniata	Actinopterygii	Actinopteri	Neopterygii	Teleostei	Cypriniphysae	Cypriniformes				Cyprinoidea	Cyprinidae				Danio				Danio rerio
IDDDAFFGLPSLEELILR	Eukaryota	Metazoa			Chordata	Craniata	Actinopterygii	Actinopteri	Neopterygii	Teleostei	Cypriniphysae	Cypriniformes				Cyprinoidea	Cyprinidae				Danio				Danio rerio
IDDLTAGLLNLSELHAFQLR	Eukaryota	Metazoa			Chordata	Craniata	Actinopterygii	Actinopteri	Neopterygii	Teleostei	Cypriniphysae	Cypriniformes				Cyprinoidea	Cyprinidae				Danio				Danio rerio
LDFTQDQMEDYR	Eukaryota	Metazoa			Chordata	Craniata	Actinopterygii	Actinopteri	Neopterygii	Teleostei	Cypriniphysae	Cypriniformes				Cyprinoidea	Cyprinidae				Danio				Danio rerio
IDGNELDLSLSNLTEVPVK	Eukaryota	Metazoa			Chordata	Craniata	Actinopterygii	Actinopteri	Neopterygii	Teleostei	Cypriniphysae	Cypriniformes				Cyprinoidea	Cyprinidae				Danio				Danio rerio
IDTAEWGIDLPTVESQLGSHR	Eukaryota	Metazoa			Chordata	Craniata	Actinopterygii	Actinopteri	Neopterygii	Teleostei	Cypriniphysae	Cypriniformes				Cyprinoidea	Cyprinidae				Danio				Danio rerio
LDYQVELQNLHR	Eukaryota	Metazoa			Chordata	Craniata	Actinopterygii	Actinopteri	Neopterygii	Teleostei	Cypriniphysae	Cypriniformes				Cyprinoidea	Cyprinidae				Danio				Danio rerio
LEADLVQIQGEMEDVVQEAR	Eukaryota	Metazoa			Chordata	Craniata	Actinopterygii	Actinopteri	Neopterygii	Teleostei	Cypriniphysae	Cypriniformes				Cyprinoidea	Cyprinidae				Danio				Danio rerio
IEAIWSQFK	Eukaryota	Metazoa			Chordata	Craniata	Actinopterygii	Actinopteri	Neopterygii	Teleostei	Cypriniphysae	Cypriniformes				Cyprinoidea	Cyprinidae				Danio				Danio rerio
LEFEVQVGPR	Eukaryota	Metazoa			Chordata	Craniata	Actinopterygii	Actinopteri	Neopterygii	Teleostei	Cypriniphysae	Cypriniformes				Cyprinoidea	Cyprinidae				Danio				Danio rerio
IEGDAIVCAAYSHELPK	Eukaryota	Metazoa			Chordata	Craniata	Actinopterygii	Actinopteri	Neopterygii	Teleostei	Cypriniphysae	Cypriniformes				Cyprinoidea	Cyprinidae				Danio				Danio rerio
LEPSPSHLPLTPEFNGDAYYLAIGGGVAQHNWSHIQSVLQDQGFR	Eukaryota	Metazoa			Chordata	Craniata	Actinopterygii	Actinopteri	Neopterygii	Teleostei	Cypriniphysae	Cypriniformes				Cyprinoidea	Cyprinidae				Danio				Danio rerio
LFDIGLLSK	Eukaryota	Metazoa			Chordata	Craniata	Actinopterygii	Actinopteri	Neopterygii	Teleostei	Cypriniphysae	Cypriniformes				Cyprinoidea	Cyprinidae				Danio				Danio rerio
LGAIPQIHEEGNALFK	Eukaryota	Metazoa			Chordata	Craniata	Actinopterygii	Actinopteri	Neopterygii	Teleostei	Cypriniphysae	Cypriniformes				Cyprinoidea	Cyprinidae				Danio				Danio rerio
IGEDFLTDLFQLR	Eukaryota	Metazoa			Chordata	Craniata	Actinopterygii	Actinopteri	Neopterygii	Teleostei	Cypriniphysae	Cypriniformes				Cyprinoidea	Cyprinidae				Danio				Danio rerio
LGFLNEQQFEEWVRPHDMLGPK	Eukaryota	Metazoa			Chordata	Craniata	Actinopterygii	Actinopteri	Neopterygii	Teleostei	Cypriniphysae	Cypriniformes				Cyprinoidea	Cyprinidae				Danio				Danio rerio
IGIFSDDEDVTGR	Eukaryota	Metazoa			Chordata	Craniata	Actinopterygii	Actinopteri	Neopterygii	Teleostei	Cypriniphysae	Cypriniformes				Cyprinoidea	Cyprinidae				Danio				Danio rerio
LGIHASSFNGYILGEHGDTSVPVWSGANVAGVSLQK	Eukaryota	Metazoa			Chordata	Craniata	Actinopterygii	Actinopteri	Neopterygii	Teleostei	Cypriniphysae	Cypriniformes				Cyprinoidea	Cyprinidae				Danio				Danio rerio
IGLVEALCGFQFMLTHLDGR	Eukaryota	Metazoa			Chordata	Craniata	Actinopterygii	Actinopteri	Neopterygii	Teleostei	Cypriniphysae	Cypriniformes				Cyprinoidea	Cyprinidae				Danio				Danio rerio
LGTNGVVHYINELLIPDSAK	Eukaryota	Metazoa			Chordata	Craniata	Actinopterygii	Actinopteri	Neopterygii	Teleostei	Cypriniphysae	Cypriniformes				Cyprinoidea	Cyprinidae				Danio				Danio rerio
IHESAGLPFFEVFVNAPLEVCESR	Eukaryota	Metazoa			Chordata	Craniata	Actinopterygii	Actinopteri	Neopterygii	Teleostei	Cypriniphysae	Cypriniformes				Cyprinoidea	Cyprinidae				Danio				Danio rerio
LHILPVDSQVESTDTTSVVTVPVSLR	Eukaryota	Metazoa			Chordata	Craniata	Actinopterygii	Actinopteri	Neopterygii	Teleostei	Cypriniphysae	Cypriniformes				Cyprinoidea	Cyprinidae				Danio				Danio rerio
LHYDGIHYLEITDCK	Eukaryota	Metazoa			Chordata	Craniata	Actinopterygii	Actinopteri	Neopterygii	Teleostei	Cypriniphysae	Cypriniformes				Cyprinoidea	Cyprinidae				Danio				Danio rerio
ILAAIQLNNTVHLSIDNSSLAADDFR	Eukaryota	Metazoa			Chordata	Craniata	Actinopterygii	Actinopteri	Neopterygii	Teleostei	Cypriniphysae	Cypriniformes				Cyprinoidea	Cyprinidae				Danio				Danio rerio
LIEGLGEEVIVAAACGR	Eukaryota	Metazoa			Chordata	Craniata	Actinopterygii	Actinopteri	Neopterygii	Teleostei	Cypriniphysae	Cypriniformes				Cyprinoidea	Cyprinidae				Danio				Danio rerio
ILIDDIDIATLGLHDLR	Eukaryota	Metazoa			Chordata	Craniata	Actinopterygii	Actinopteri	Neopterygii	Teleostei	Cypriniphysae	Cypriniformes				Cyprinoidea	Cyprinidae				Danio				Danio rerio
LLMEEDEECYK	Eukaryota	Metazoa			Chordata	Craniata	Actinopterygii	Actinopteri	Neopterygii	Teleostei	Cypriniphysae	Cypriniformes				Cyprinoidea	Cyprinidae				Danio				Danio rerio
LISLLPEYVVPYAIHLLVHDPDYVK	Eukaryota	Metazoa			Chordata	Craniata	Actinopterygii	Actinopteri	Neopterygii	Teleostei	Cypriniphysae	Cypriniformes				Cyprinoidea	Cyprinidae				Danio				Danio rerio
IITTEEIIAIILK	Eukaryota	Metazoa			Chordata	Craniata	Actinopterygii	Actinopteri	Neopterygii	Teleostei	Cypriniphysae	Cypriniformes				Cyprinoidea	Cyprinidae				Danio				Danio rerio
IIVENLYYPVSLEVLHQIFSK	Eukaryota	Metazoa			Chordata	Craniata	Actinopterygii	Actinopteri	Neopterygii	Teleostei	Cypriniphysae	Cypriniformes				Cyprinoidea	Cyprinidae				Danio				Danio rerio
ILVTGGGGYIGSHCVVELIEAGFHPVVIDNFSNAVR	Eukaryota	Metazoa			Chordata	Craniata	Actinopterygii	Actinopteri	Neopterygii	Teleostei	Cypriniphysae	Cypriniformes				Cyprinoidea	Cyprinidae				Danio				Danio rerio
LMPILEAIR	Eukaryota	Metazoa			Chordata	Craniata	Actinopterygii	Actinopteri	Neopterygii	Teleostei	Cypriniphysae	Cypriniformes				Cyprinoidea	Cyprinidae				Danio				Danio rerio
LMVDEFVTHTLPFAQINEAFDLMHAGK	Eukaryota	Metazoa			Chordata	Craniata	Actinopterygii	Actinopteri	Neopterygii	Teleostei	Cypriniphysae	Cypriniformes				Cyprinoidea	Cyprinidae				Danio				Danio rerio
INAGQIEEVIAQAEAELSLSR	Eukaryota	Metazoa			Chordata	Craniata	Actinopterygii	Actinopteri	Neopterygii	Teleostei	Cypriniphysae	Cypriniformes				Cyprinoidea	Cyprinidae				Danio				Danio rerio
LPVDMLAFELAK	Eukaryota	Metazoa			Chordata	Craniata	Actinopterygii	Actinopteri	Neopterygii	Teleostei	Cypriniphysae	Cypriniformes				Cyprinoidea	Cyprinidae				Danio				Danio rerio
IQAISSAVYHLDQVELPLR	Eukaryota	Metazoa			Chordata	Craniata	Actinopterygii	Actinopteri	Neopterygii	Teleostei	Cypriniphysae	Cypriniformes				Cyprinoidea	Cyprinidae				Danio				Danio rerio
LSAEEFEAIFNYYDK	Eukaryota	Metazoa			Chordata	Craniata	Actinopterygii	Actinopteri	Neopterygii	Teleostei	Cypriniphysae	Cypriniformes				Cyprinoidea	Cyprinidae				Danio				Danio rerio
ISASLAWDKPEDDGGSR	Eukaryota	Metazoa			Chordata	Craniata	Actinopterygii	Actinopteri	Neopterygii	Teleostei	Cypriniphysae	Cypriniformes				Cyprinoidea	Cyprinidae				Danio				Danio rerio
ISEKPPPGYPGLETMLPLLFTAVSEGR	Eukaryota	Metazoa			Chordata	Craniata	Actinopterygii	Actinopteri	Neopterygii	Teleostei	Cypriniphysae	Cypriniformes				Cyprinoidea	Cyprinidae				Danio				Danio rerio
LSFPSGGAIELGQHLFK	Eukaryota	Metazoa			Chordata	Craniata	Actinopterygii	Actinopteri	Neopterygii	Teleostei	Cypriniphysae	Cypriniformes				Cyprinoidea	Cyprinidae				Danio				Danio rerio
ISHDVSTGIIQMTIEHFTK	Eukaryota	Metazoa			Chordata	Craniata	Actinopterygii	Actinopteri	Neopterygii	Teleostei	Cypriniphysae	Cypriniformes				Cyprinoidea	Cyprinidae				Danio				Danio rerio
LSNLTSSLSDQIISHLFSQQELSANTELIQTHR	Eukaryota	Metazoa			Chordata	Craniata	Actinopterygii	Actinopteri	Neopterygii	Teleostei	Cypriniphysae	Cypriniformes				Cyprinoidea	Cyprinidae				Danio				Danio rerio
LSPIFISVNYSLADSQNAVLHGQSVAVGQTR	Eukaryota	Metazoa			Chordata	Craniata	Actinopterygii	Actinopteri	Neopterygii	Teleostei	Cypriniphysae	Cypriniformes				Cyprinoidea	Cyprinidae				Danio				Danio rerio
ISVAGVTSGNVEYLAHAIHQVTK	Eukaryota	Metazoa			Chordata	Craniata	Actinopterygii	Actinopteri	Neopterygii	Teleostei	Cypriniphysae	Cypriniformes				Cyprinoidea	Cyprinidae				Danio				Danio rerio
ISWLDYLYYFSYIK	Eukaryota	Metazoa			Chordata	Craniata	Actinopterygii	Actinopteri	Neopterygii	Teleostei	Cypriniphysae	Cypriniformes				Cyprinoidea	Cyprinidae				Danio				Danio rerio
ITAEIQLANHGSSR	Eukaryota	Metazoa			Chordata	Craniata	Actinopterygii	Actinopteri	Neopterygii	Teleostei	Cypriniphysae	Cypriniformes				Cyprinoidea	Cyprinidae				Danio				Danio rerio
ITEAGLIEILEK	Eukaryota	Metazoa			Chordata	Craniata	Actinopterygii	Actinopteri	Neopterygii	Teleostei	Cypriniphysae	Cypriniformes				Cyprinoidea	Cyprinidae				Danio				Danio rerio
ITGIEECDLLLLIGTNPR	Eukaryota	Metazoa			Chordata	Craniata	Actinopterygii	Actinopteri	Neopterygii	Teleostei	Cypriniphysae	Cypriniformes				Cyprinoidea	Cyprinidae				Danio				Danio rerio
ITQLQNLDGLHNLTVLSIQSNR	Eukaryota	Metazoa			Chordata	Craniata	Actinopterygii	Actinopteri	Neopterygii	Teleostei	Cypriniphysae	Cypriniformes				Cyprinoidea	Cyprinidae				Danio				Danio rerio
LVELNEDVRPYIR	Eukaryota	Metazoa			Chordata	Craniata	Actinopterygii	Actinopteri	Neopterygii	Teleostei	Cypriniphysae	Cypriniformes				Cyprinoidea	Cyprinidae				Danio				Danio rerio
LVLASGPVGIMQAVLDHAIPYLHVR	Eukaryota	Metazoa			Chordata	Craniata	Actinopterygii	Actinopteri	Neopterygii	Teleostei	Cypriniphysae	Cypriniformes				Cyprinoidea	Cyprinidae				Danio				Danio rerio
LVNSHSMHETSSVLVDPVTR	Eukaryota	Metazoa			Chordata	Craniata	Actinopterygii	Actinopteri	Neopterygii	Teleostei	Cypriniphysae	Cypriniformes				Cyprinoidea	Cyprinidae				Danio				Danio rerio
IVPVQITINLLR	Eukaryota	Metazoa			Chordata	Craniata	Actinopterygii	Actinopteri	Neopterygii	Teleostei	Cypriniphysae	Cypriniformes				Cyprinoidea	Cyprinidae				Danio				Danio rerio
MDYYYTPLMIGAAGSAYMINDAATILPR	Eukaryota	Metazoa			Chordata	Craniata	Actinopterygii	Actinopteri	Neopterygii	Teleostei	Cypriniphysae	Cypriniformes				Cyprinoidea	Cyprinidae				Danio				Danio rerio
MTASLATHEK	Eukaryota	Metazoa			Chordata	Craniata	Actinopterygii	Actinopteri	Neopterygii	Teleostei	Cypriniphysae	Cypriniformes				Cyprinoidea	Cyprinidae				Danio				Danio rerio
NAITFIEQGHIR	Eukaryota	Metazoa			Chordata	Craniata	Actinopterygii	Actinopteri	Neopterygii	Teleostei	Cypriniphysae	Cypriniformes				Cyprinoidea	Cyprinidae				Danio				Danio rerio
NDNGQVAFVCHHAIPESER	Eukaryota	Metazoa			Chordata	Craniata	Actinopterygii	Actinopteri	Neopterygii	Teleostei	Cypriniphysae	Cypriniformes				Cyprinoidea	Cyprinidae				Danio				Danio rerio
NHSYLDLVR	Eukaryota	Metazoa			Chordata	Craniata	Actinopterygii	Actinopteri	Neopterygii	Teleostei	Cypriniphysae	Cypriniformes				Cyprinoidea	Cyprinidae				Danio				Danio rerio
NILESHHVPELVK	Eukaryota	Metazoa			Chordata	Craniata	Actinopterygii	Actinopteri	Neopterygii	Teleostei	Cypriniphysae	Cypriniformes				Cyprinoidea	Cyprinidae				Danio				Danio rerio
NNEDVDAIKPLFSVNVDHR	Eukaryota	Metazoa			Chordata	Craniata	Actinopterygii	Actinopteri	Neopterygii	Teleostei	Cypriniphysae	Cypriniformes				Cyprinoidea	Cyprinidae				Danio				Danio rerio
NSTLFYIIGQHSAR	Eukaryota	Metazoa			Chordata	Craniata	Actinopterygii	Actinopteri	Neopterygii	Teleostei	Cypriniphysae	Cypriniformes				Cyprinoidea	Cyprinidae				Danio				Danio rerio
QAGEVTFADAHRPNLNEGVVEFASHSDLK	Eukaryota	Metazoa			Chordata	Craniata	Actinopterygii	Actinopteri	Neopterygii	Teleostei	Cypriniphysae	Cypriniformes				Cyprinoidea	Cyprinidae				Danio				Danio rerio
QDIITTNSK	Eukaryota	Metazoa			Chordata	Craniata	Actinopterygii	Actinopteri	Neopterygii	Teleostei	Cypriniphysae	Cypriniformes				Cyprinoidea	Cyprinidae				Danio				Danio rerio
QENVLADTHIYYLR	Eukaryota	Metazoa			Chordata	Craniata	Actinopterygii	Actinopteri	Neopterygii	Teleostei	Cypriniphysae	Cypriniformes				Cyprinoidea	Cyprinidae				Danio				Danio rerio
QEVVASTETLQTSK	Eukaryota	Metazoa			Chordata	Craniata	Actinopterygii	Actinopteri	Neopterygii	Teleostei	Cypriniphysae	Cypriniformes				Cyprinoidea	Cyprinidae				Danio				Danio rerio
QHAFWVGLAR	Eukaryota	Metazoa			Chordata	Craniata	Actinopterygii	Actinopteri	Neopterygii	Teleostei	Cypriniphysae	Cypriniformes				Cyprinoidea	Cyprinidae				Danio				Danio rerio
QHEDFIWLHDAIVETEEYAGLIIPPAPPKPDFEGPR	Eukaryota	Metazoa			Chordata	Craniata	Actinopterygii	Actinopteri	Neopterygii	Teleostei	Cypriniphysae	Cypriniformes				Cyprinoidea	Cyprinidae				Danio				Danio rerio
QLVIVITRPQDVGEYTYQVANSK	Eukaryota	Metazoa			Chordata	Craniata	Actinopterygii	Actinopteri	Neopterygii	Teleostei	Cypriniphysae	Cypriniformes				Cyprinoidea	Cyprinidae				Danio				Danio rerio
QSMPPSFSNSSNLYQGESK	Eukaryota	Metazoa			Chordata	Craniata	Actinopterygii	Actinopteri	Neopterygii	Teleostei	Cypriniphysae	Cypriniformes				Cyprinoidea	Cyprinidae				Danio				Danio rerio
QVGAAATGVTQALNELLQHIR	Eukaryota	Metazoa			Chordata	Craniata	Actinopterygii	Actinopteri	Neopterygii	Teleostei	Cypriniphysae	Cypriniformes				Cyprinoidea	Cyprinidae				Danio				Danio rerio
QWWFGGGTDLTPVYIDLEDATHFHK	Eukaryota	Metazoa			Chordata	Craniata	Actinopterygii	Actinopteri	Neopterygii	Teleostei	Cypriniphysae	Cypriniformes				Cyprinoidea	Cyprinidae				Danio				Danio rerio
RPSLMAAMMAEELK	Eukaryota	Metazoa			Chordata	Craniata	Actinopterygii	Actinopteri	Neopterygii	Teleostei	Cypriniphysae	Cypriniformes				Cyprinoidea	Cyprinidae				Danio				Danio rerio
SADPFITLLTEWYLTR	Eukaryota	Metazoa			Chordata	Craniata	Actinopterygii	Actinopteri	Neopterygii	Teleostei	Cypriniphysae	Cypriniformes				Cyprinoidea	Cyprinidae				Danio				Danio rerio
SDGLYDPLEYENHPELYTSHFR	Eukaryota	Metazoa			Chordata	Craniata	Actinopterygii	Actinopteri	Neopterygii	Teleostei	Cypriniphysae	Cypriniformes				Cyprinoidea	Cyprinidae				Danio				Danio rerio
SDHYHEYEDAAEEFHPHIK	Eukaryota	Metazoa			Chordata	Craniata	Actinopterygii	Actinopteri	Neopterygii	Teleostei	Cypriniphysae	Cypriniformes				Cyprinoidea	Cyprinidae				Danio				Danio rerio
SEFGEHEEIALAHNR	Eukaryota	Metazoa			Chordata	Craniata	Actinopterygii	Actinopteri	Neopterygii	Teleostei	Cypriniphysae	Cypriniformes				Cyprinoidea	Cyprinidae				Danio				Danio rerio
SEIHHDHHQYFSSAEIK	Eukaryota	Metazoa			Chordata	Craniata	Actinopterygii	Actinopteri	Neopterygii	Teleostei	Cypriniphysae	Cypriniformes				Cyprinoidea	Cyprinidae				Danio				Danio rerio
SEQSDQHIEHTTDGENQIVFTHR	Eukaryota	Metazoa			Chordata	Craniata	Actinopterygii	Actinopteri	Neopterygii	Teleostei	Cypriniphysae	Cypriniformes				Cyprinoidea	Cyprinidae				Danio				Danio rerio
SFFLMPGEHLENGIQDVYVLSEEEGLVLR	Eukaryota	Metazoa			Chordata	Craniata	Actinopterygii	Actinopteri	Neopterygii	Teleostei	Cypriniphysae	Cypriniformes				Cyprinoidea	Cyprinidae				Danio				Danio rerio
SFLDHFESLEK	Eukaryota	Metazoa			Chordata	Craniata	Actinopterygii	Actinopteri	Neopterygii	Teleostei	Cypriniphysae	Cypriniformes				Cyprinoidea	Cyprinidae				Danio				Danio rerio
SGLDWCNAGWLSDGTVQYPITKPR	Eukaryota	Metazoa			Chordata	Craniata	Actinopterygii	Actinopteri	Neopterygii	Teleostei	Cypriniphysae	Cypriniformes				Cyprinoidea	Cyprinidae				Danio				Danio rerio
SHILNVDITSQTFTDVNLR	Eukaryota	Metazoa			Chordata	Craniata	Actinopterygii	Actinopteri	Neopterygii	Teleostei	Cypriniphysae	Cypriniformes				Cyprinoidea	Cyprinidae				Danio				Danio rerio
SLAVAQALADDLDFHVFPIQEFGK	Eukaryota	Metazoa			Chordata	Craniata	Actinopterygii	Actinopteri	Neopterygii	Teleostei	Cypriniphysae	Cypriniformes				Cyprinoidea	Cyprinidae				Danio				Danio rerio
SLGNAAHLSSIK	Eukaryota	Metazoa			Chordata	Craniata	Actinopterygii	Actinopteri	Neopterygii	Teleostei	Cypriniphysae	Cypriniformes				Cyprinoidea	Cyprinidae				Danio				Danio rerio
SLGNIISVLDR	Eukaryota	Metazoa			Chordata	Craniata	Actinopterygii	Actinopteri	Neopterygii	Teleostei	Cypriniphysae	Cypriniformes				Cyprinoidea	Cyprinidae				Danio				Danio rerio
SLIDSLHEQGSLLPEAYAHSPQVEGR	Eukaryota	Metazoa			Chordata	Craniata	Actinopterygii	Actinopteri	Neopterygii	Teleostei	Cypriniphysae	Cypriniformes				Cyprinoidea	Cyprinidae				Danio				Danio rerio
SLLNMFPTDFLR	Eukaryota	Metazoa			Chordata	Craniata	Actinopterygii	Actinopteri	Neopterygii	Teleostei	Cypriniphysae	Cypriniformes				Cyprinoidea	Cyprinidae				Danio				Danio rerio
SLQDVQIWFQPNQGDSSSLFMPQSGSQDGFSFSDPLADLNVEAMSSDK	Eukaryota	Metazoa			Chordata	Craniata	Actinopterygii	Actinopteri	Neopterygii	Teleostei	Cypriniphysae	Cypriniformes				Cyprinoidea	Cyprinidae				Danio				Danio rerio
SLVLSIAFNLLDAEAK	Eukaryota	Metazoa			Chordata	Craniata	Actinopterygii	Actinopteri	Neopterygii	Teleostei	Cypriniphysae	Cypriniformes				Cyprinoidea	Cyprinidae				Danio				Danio rerio
STDIAIVVLDKPSPPASVK	Eukaryota	Metazoa			Chordata	Craniata	Actinopterygii	Actinopteri	Neopterygii	Teleostei	Cypriniphysae	Cypriniformes				Cyprinoidea	Cyprinidae				Danio				Danio rerio
SVSGLEETFHR	Eukaryota	Metazoa			Chordata	Craniata	Actinopterygii	Actinopteri	Neopterygii	Teleostei	Cypriniphysae	Cypriniformes				Cyprinoidea	Cyprinidae				Danio				Danio rerio
SVTELFSVSSNVYAVSR	Eukaryota	Metazoa			Chordata	Craniata	Actinopterygii	Actinopteri	Neopterygii	Teleostei	Cypriniphysae	Cypriniformes				Cyprinoidea	Cyprinidae				Danio				Danio rerio
TAEIQAVSLYNSVQEVTQR	Eukaryota	Metazoa			Chordata	Craniata	Actinopterygii	Actinopteri	Neopterygii	Teleostei	Cypriniphysae	Cypriniformes				Cyprinoidea	Cyprinidae				Danio				Danio rerio
TAVEPALEGSPTAGSLK	Eukaryota	Metazoa			Chordata	Craniata	Actinopterygii	Actinopteri	Neopterygii	Teleostei	Cypriniphysae	Cypriniformes				Cyprinoidea	Cyprinidae				Danio				Danio rerio
TDGEGFSLFLGNLNNNK	Eukaryota	Metazoa			Chordata	Craniata	Actinopterygii	Actinopteri	Neopterygii	Teleostei	Cypriniphysae	Cypriniformes				Cyprinoidea	Cyprinidae				Danio				Danio rerio
TDHGIYQITGTNPSGTK	Eukaryota	Metazoa			Chordata	Craniata	Actinopterygii	Actinopteri	Neopterygii	Teleostei	Cypriniphysae	Cypriniformes				Cyprinoidea	Cyprinidae				Danio				Danio rerio
TGTYSQLFHPEQLITGK	Eukaryota	Metazoa			Chordata	Craniata	Actinopterygii	Actinopteri	Neopterygii	Teleostei	Cypriniphysae	Cypriniformes				Cyprinoidea	Cyprinidae				Danio				Danio rerio
TLGVSHIVTGLLEGAIYQFR	Eukaryota	Metazoa			Chordata	Craniata	Actinopterygii	Actinopteri	Neopterygii	Teleostei	Cypriniphysae	Cypriniformes				Cyprinoidea	Cyprinidae				Danio				Danio rerio
TIIEEAIPMATGPKPR	Eukaryota	Metazoa			Chordata	Craniata	Actinopterygii	Actinopteri	Neopterygii	Teleostei	Cypriniphysae	Cypriniformes				Cyprinoidea	Cyprinidae				Danio				Danio rerio
TLPSLVVHVR	Eukaryota	Metazoa			Chordata	Craniata	Actinopterygii	Actinopteri	Neopterygii	Teleostei	Cypriniphysae	Cypriniformes				Cyprinoidea	Cyprinidae				Danio				Danio rerio
[truncated: 1,541 more rows]

## Sheet: Control Injection - Injection C
Injection Control
[truncated: 2,765 more rows]

## Sheet: Infected Injection - Injection
Injection
[truncated: 4,894 more rows]

## Sheet: Infected Injection - Tabla 1
Tabla 1
